# Supplementary material for: A Multi-Omics Analysis Pipeline for the Metabolic Pathway Reconstruction in the Orphan Species Quercus ilex
Source: Front Plant Sci. 2018 Jul 11;9:935. doi: 10.3389/fpls.2018.00935 (PMC6050436; doi:10.3389/fpls.2018.00935)
Supplement: TABLE S4 — Comparison of KEGG pathways of different species. [file Table_4.XLSX]

## Sheet: Table S4 | Comparison_EC_Specie
Table S4 | Comparison of KEGG pathways of different species
	Metabolic pathway (Arabidopsis thaliana (thale cress))	Arabidopsis	Eucalyptus	Oryza	Populus	Quercus	Quercus_Sma3S
Environmental adaptation	Circadian rhythm (ath04712)	3	2	3	2	2	2
	Plant-pathogen interaction (ath04626)	9	3	5	3	2	10
Transport and catabolism	Autophagy - other (ath04136)	3	2	2	2	2	3
	Endocytosis (ath04144)	5	3	3	3	1	4
	Peroxisome (ath04146)	18	5	8	5	5	20
	Phagosome (ath04145)	3	1	1	1	1	3
Signal transduction	Phosphatidylinositol signaling system (ath04070)	24	11	13	11	3	24
	Plant hormone signal transduction (ath04075)	7	4	6	4	3	7
	MAPK signaling pathway (ath04016)	13	5	9	6	6	12
Membrane transport	ABC transporters (ath02010)	1					1
Replication and repair	Base excision repair (ath03410)	8	5	5	5		9
	DNA replication (ath03030)	4	3	3	3		4
	Homologous recombination (ath03440)	4	4	4	4	2	4
	Mismatch repair (ath03430)	2	2	2	2		2
	Non-homologous end-joining (ath03450)	2	2	2	2		2
	Nucleotide excision repair (ath03420)	5	3	5	3	1	5
Folding, sorting and degradation	Proteasome (ath03050)	1	1	1	1	1	1
	Protein export (ath03060)	1	1	1	1		2
	Protein processing in endoplasmic reticulum (ath04141)	9	4	7	4	2	10
	RNA degradation (ath03018)	8	3	5	3	1	7
	SNARE interactions in vesicular transport (ath04130)
	Sulfur relay system (ath04122)	8	3	3	3		6
	Ubiquitin mediated proteolysis (ath04120)	25	2	3	2	1	5
Translation	Aminoacyl-tRNA biosynthesis (ath00970)	21	4	7	4	4	23
	mRNA surveillance pathway (ath03015)	4	3	3	3	1	6
	Ribosome (ath03010)
	Ribosome biogenesis in eukaryotes (ath03008)	3	3	2	2	2	4
	RNA transport (ath03013)	4	3	2	2		4
Transcription	Basal transcription factors (ath03022)	3	1	3	1		3
	RNA polymerase (ath03020)	1	1	1	1	1	1
	Spliceosome (ath03040)	3	3	3	3	1	2
Biosynthesis of other secondary metabolites	Anthocyanin biosynthesis (ath00942)	1				4	2
	Caffeine metabolism (ath00232)	2	1	2	1	1	3
	Flavone and flavonol biosynthesis (ath00944)	2		1		6	2
	Flavonoid biosynthesis (ath00941)	12		5		7	13
	Glucosinolate biosynthesis (ath00966)	13	2	2	2	1	6
	Indole alkaloid biosynthesis (ath00901)	1				9	2
	Isoquinoline alkaloid biosynthesis (ath00950)	6	1	2	1	2	7
	Monobactam biosynthesis (ath00261)	6	4	5	3	1	7
	Phenylpropanoid biosynthesis (ath00940)	14	3	9	4	7	17
	Stilbenoid, diarylheptanoid and gingerol biosynthesis (ath00945)	3				1	4
	Tropane, piperidine and pyridine alkaloid biosynthesis (ath00960)	6	1	1	1	2	7
Metabolism of terpenoids and polyketides	Brassinosteroid biosynthesis (ath00905)	2				1	2
	Carotenoid biosynthesis (ath00906)	20	2	9	2	5	16
	Diterpenoid biosynthesis (ath00904)	7		4		11	7
	Sesquiterpenoid and triterpenoid biosynthesis (ath00909)	18				5	15
	Zeatin biosynthesis (ath00908)	4		2		4	4
Glycan biosynthesis and metabolism	Glycosaminoglycan degradation (ath00531)	3	2	2	2	1	4
	Glycosphingolipid biosynthesis - ganglio series (ath00604)	2	2	2	2	1	2
	Glycosphingolipid biosynthesis - globo and isoglobo series (ath00603)	2	2	2	2	1	3
	Glycosphingolipid biosynthesis - lacto and neolacto series (ath00601)					3	1
	Glycosylphosphatidylinositol (GPI)-anchor biosynthesis (ath00563)	1
	N-Glycan biosynthesis (ath00510)	17	1	2	1	3	25
	Other glycan degradation (ath00511)	6	3	4	3	1	7
	Other types of O-glycan biosynthesis (ath00514)	2		1		2	2
Metabolism of other amino acids	beta-Alanine metabolism (ath00410)	13	1	4	1	5	18
	Cyanoamino acid metabolism (ath00460)	12	3	5	3	5	12
	Glutathione metabolism (ath00480)	17	5	13	5	10	18
	Phosphonate and phosphinate metabolism (ath00440)	3				2	3
	Selenocompound metabolism (ath00450)	11	3	5	3	3	11
	Taurine and hypotaurine metabolism (ath00430)	3	1	1	1	1	5
Nucleotide metabolism	Purine metabolism (ath00230)	41	15	27	13	13	49
	Pyrimidine metabolism (ath00240)	26	9	20	9	4	30
Amino acid metabolism	Alanine, aspartate and glutamate metabolism (ath00250)	23	7	14	7	9	27
	Arginine and proline metabolism (ath00330)	21	6	14	7	7	23
	Arginine biosynthesis (ath00220)	18	5	9	5	8	20
	Cysteine and methionine metabolism (ath00270)	35	16	25	16	10	37
	Glycine, serine and threonine metabolism (ath00260)	27	10	11	10	11	31
	Histidine metabolism (ath00340)	12	4	5	4	4	14
	Lysine biosynthesis (ath00300)	7	3	7	2	10	8
	Lysine degradation (ath00310)	8	1	2	1	2	11
	Phenylalanine metabolism (ath00360)	12	2	4	2	4	14
	Phenylalanine, tyrosine and tryptophan biosynthesis (ath00400)	21	7	9	7	4	21
	Tryptophan metabolism (ath00380)	15	1	4	1	4	15
	Tyrosine metabolism (ath00350)	13	2	7	2	3	15
	Valine, leucine and isoleucine biosynthesis (ath00290)	8	5	5	5	4	9
	Valine, leucine and isoleucine degradation (ath00280)	16	4	7	4	4	21
Lipid metabolism	alpha-Linolenic acid metabolism (ath00592)	15	1	10	1	4	17
	Arachidonic acid metabolism (ath00590)	7	1	3	1	1	10
	Biosynthesis of unsaturated fatty acids (ath01040)	9	1	2	1	3	13
	Cutin, suberine and wax biosynthesis (ath00073)	5	1	3	1		5
	Ether lipid metabolism (ath00565)	7	2	7	2	1	8
	Fatty acid biosynthesis (ath00061)	9		4	2	4	15
	Fatty acid degradation (ath00071)	10	1	5	1	5	13
	Fatty acid elongation (ath00062)	4	1	1	1	2	8
	Glycerolipid metabolism (ath00561)	20	4	9	4	5	27
	Glycerophospholipid metabolism (ath00564)	28	9	16	9	2	32
	Linoleic acid metabolism (ath00591)	5	1	4	1	1	6
	Sphingolipid metabolism (ath00600)	11	3	8	3	2	11
	Steroid biosynthesis (ath00100)	18	1	6	1		19
	Synthesis and degradation of ketone bodies (ath00072)	3	1	1	1		3
Energy metabolism	Carbon fixation in photosynthetic organisms (ath00710)	23	7	12	7	20	23
	Nitrogen metabolism (ath00910)	10	3	9	3	6	14
	Oxidative phosphorylation (ath00190)	8	7	8	6	5	8
	Photosynthesis - antenna proteins (ath00196)
	Photosynthesis (ath00195)	4	3	4	4	3	4
	Sulfur metabolism (ath00920)	14	2	5	2	1	14
Carbohydrate metabolism	Amino sugar and nucleotide sugar metabolism (ath00520)	35	8	20	9	12	38
	Ascorbate and aldarate metabolism (ath00053)	17	3	11	2	9	19
	Butanoate metabolism (ath00650)	8	3	5	3	2	9
	C5-Branched dibasic acid metabolism (ath00660)	3	2	2	2	2	4
	Citrate cycle (TCA cycle) (ath00020)	13	8	9	8	9	16
	Fructose and mannose metabolism (ath00051)	19	6	15	6	8	22
	Galactose metabolism (ath00052)	12	4	10	4	9	15
	Glycolysis / Gluconeogenesis (ath00010)	27	13	22	14	20	30
	Glyoxylate and dicarboxylate metabolism (ath00630)	27	12	14	11	16	27
	Inositol phosphate metabolism (ath00562)	27	10	15	9	5	29
	Pentose and glucuronate interconversions (ath00040)	11	5	6	5	7	12
	Pentose phosphate pathway (ath00030)	16	10	12	9	10	17
	Propanoate metabolism (ath00640)	11	3	6	6	4	15
	Pyruvate metabolism (ath00620)	25	9	15	11	17	26
	Starch and sucrose metabolism (ath00500)	25	11	21	11	18	26
Global and overview maps	2-Oxocarboxylic acid metabolism (ath01210)	30	10	11	10	10	27
	Biosynthesis of amino acids (ath01230)	92	37	52	36	34	99
	Biosynthesis of secondary metabolites (ath01110)	356	96	197	98	100	382
	Carbon metabolism (ath01200)	79	35	50	36	49	88
	Fatty acid metabolism (ath01212)	18	1	7	3	6	30
	Metabolic pathways (ath01100)	577	162	327	166	160	658
Endocrine and metabolic diseases	AGE-RAGE signaling pathway in diabetic complications (ath04933)	2	2	2	2	1	2
Metabolism of cofactors and vitamins	Biotin metabolism (ath00780)	8		3		2	13
	Folate biosynthesis (ath00790)	19	4	9	4	1	18
	Lipoic acid metabolism (ath00785)	2	1	1	1		2
	Nicotinate and nicotinamide metabolism (ath00760)	10	4	8	5	4	11
	One carbon pool by folate (ath00670)	9	4	6	4	19	12
	Pantothenate and CoA biosynthesis (ath00770)	13	5	9	5	2	13
	Porphyrin and chlorophyll metabolism (ath00860)	28	7	19	7	8	28
	Riboflavin metabolism (ath00740)	11	2	5	2	1	10
	Thiamine metabolism (ath00730)	9	2	5	2	1	10
	Ubiquinone and other terpenoid-quinone biosynthesis (ath00130)	20	3	10	4	1	23
	Vitamin B6 metabolism (ath00750)	7	2	3	2	3	8
Metabolism of terpenoids and polyketides	Monoterpenoid biosynthesis (ath00902)	4		1		10	4
	Terpenoid backbone biosynthesis (ath00900)	26	6	17	6	2	27
Drug resistance: Antimicrobial	Vancomycin resistance (ath01502)						1
Others		245	42	121	42	18	1217
	Betalain biosynthesis ( ath00965)						1
	ec:4.1.1.28 aromatic-L-amino-acid decarboxylase; DOPA decarboxylase; tryptophan decarboxylase; hydroxytryptophan decarboxylase; L-DOPA decarboxylase; aromatic amino acid decarboxylase; 5-hydroxytryptophan decarboxylase; aromatic-L-amino-acid carboxy-lyase (tryptamine-forming)
