# Supplementary material for: A Multi-Omics Analysis Pipeline for the Metabolic Pathway Reconstruction in the Orphan Species Quercus ilex
Source: Front Plant Sci. 2018 Jul 11;9:935. doi: 10.3389/fpls.2018.00935 (PMC6050436; doi:10.3389/fpls.2018.00935)
Supplement: TABLE S5 — Bins of transcripts. [file Table_5.XLSX]

## Sheet: Table S5 | ME_Bins_Transcripts
Table S5 | Bins of Transcripts		Table S5 | Bins of Proteins		Table S5 | Bins of Proteins		Table S5 | Bins of Proteins		Table S5 | Bins of Proteins		Table S5 | Bins of Proteins		Table S5 | Bins of Proteins		Table S5 | Bins of Proteins		Table S5 | Bins of Proteins		Table S5 | Bins of Proteins		Table S5 | Bins of Proteins		Table S5 | Bins of Proteins		Table S5 | Bins of Proteins		Table S5 | Bins of Proteins		Table S5 | Bins of Proteins		Table S5 | Bins of Proteins		Table S5 | Bins of Proteins		Table S5 | Bins of Proteins		Table S5 | Bins of Proteins		Table S5 | Bins of Proteins		Table S5 | Bins of Proteins		Table S5 | Bins of Proteins		Table S5 | Bins of Proteins		Table S5 | Bins of Proteins		Table S5 | Bins of Proteins
Name	Identifier
1. PS
Bin: 1.3.13	PS.calvin cycle.rubisco interacting
	Id: seq_41
	(q40281|rca_maldo : 620.0) Ribulose bisphosphate carboxylase/oxygenase activase, chloroplast precursor (RuBisCO activase) (RA) - Malus domestica (Apple) (Malus sylvestris) & (at2g39730 : 589.0) Rubisco activase, a nuclear-encoded chloroplast protein that consists of two isoforms arising from alternative splicing in most plants. Required for the light activation of rubisco.; rubisco activase (RCA)…
Bin: 1.3.13	PS.calvin cycle.rubisco interacting
	Id: seq_478
	(p93431|rca_orysa : 189.0) Ribulose bisphosphate carboxylase/oxygenase activase, chloroplast precursor (RuBisCO activase) (RA) - Oryza sativa (Rice) & (at2g39730 : 186.0) Rubisco activase, a nuclear-encoded chloroplast protein that consists of two isoforms arising from alternative splicing in most plants. Required for the light activation of rubisco.; rubisco activase (RCA); FUNCTIONS IN: enzyme …
Bin: 1.3.13	PS.calvin cycle.rubisco interacting
	Id: seq_939
	(q40281|rca_maldo : 221.0) Ribulose bisphosphate carboxylase/oxygenase activase, chloroplast precursor (RuBisCO activase) (RA) - Malus domestica (Apple) (Malus sylvestris) & (at2g39730 : 204.0) Rubisco activase, a nuclear-encoded chloroplast protein that consists of two isoforms arising from alternative splicing in most plants. Required for the light activation of rubisco.; rubisco activase (RCA)…
Bin: 1.3.13	PS.calvin cycle.rubisco interacting
	Id: seq_3389
	(q40281|rca_maldo : 230.0) Ribulose bisphosphate carboxylase/oxygenase activase, chloroplast precursor (RuBisCO activase) (RA) - Malus domestica (Apple) (Malus sylvestris) & (at2g39730 : 200.0) Rubisco activase, a nuclear-encoded chloroplast protein that consists of two isoforms arising from alternative splicing in most plants. Required for the light activation of rubisco.; rubisco activase (RCA)…
Bin: 1.3.13	PS.calvin cycle.rubisco interacting
	Id: seq_7577
	(p94026|rbcmt_tobac : 655.0) Ribulose-1,5 bisphosphate carboxylase/oxygenase large subunit N-methyltransferase, chloroplast precursor (EC 2.1.1.127) ([Ribulose-bisphosphate carboxylase]-lysine N-methyltransferase) (RuBisCO methyltransferase) (RuBisCO LSMT) (rbcMT) & (at1g14030 : 619.0) Rubisco methyltransferase family protein; FUNCTIONS IN: [ribulose-bisphosphate carboxylase]-lysine N-methyltrans…
Bin: 1.3.13	PS.calvin cycle.rubisco interacting
	Id: seq_8949
	(p08926|ruba_pea : 892.0) RuBisCO large subunit-binding protein subunit alpha, chloroplast precursor (60 kDa chaperonin subunit alpha) (CPN-60 alpha) - Pisum sativum (Garden pea) & (at2g28000 : 876.0) Encodes chaperonin-60 alpha, a molecular chaperone involved in Rubisco folding. Mutants display aberrant chloroplast and embryo development.; chaperonin-60alpha (CPN60A); FUNCTIONS IN: ATP binding; …
Bin: 1.3.13	PS.calvin cycle.rubisco interacting
	Id: seq_10935
	(p08824|ruba_ricco : 141.0) RuBisCO large subunit-binding protein subunit alpha (60 kDa chaperonin subunit alpha) (CPN-60 alpha) (Fragment) - Ricinus communis (Castor bean) & (at2g28000 : 124.0) Encodes chaperonin-60 alpha, a molecular chaperone involved in Rubisco folding. Mutants display aberrant chloroplast and embryo development.; chaperonin-60alpha (CPN60A); FUNCTIONS IN: ATP binding; INVOLV…
Bin: 1.3.13	PS.calvin cycle.rubisco interacting
	Id: seq_16791
	(p93431|rca_orysa : 162.0) Ribulose bisphosphate carboxylase/oxygenase activase, chloroplast precursor (RuBisCO activase) (RA) - Oryza sativa (Rice) & (at2g39730 : 156.0) Rubisco activase, a nuclear-encoded chloroplast protein that consists of two isoforms arising from alternative splicing in most plants. Required for the light activation of rubisco.; rubisco activase (RCA); FUNCTIONS IN: enzyme …
Bin: 1.3.13	PS.calvin cycle.rubisco interacting
	Id: seq_19506
	(at3g13470 : 155.0) TCP-1/cpn60 chaperonin family protein; FUNCTIONS IN: ATP binding; INVOLVED IN: protein folding, protein refolding, cellular protein metabolic process; LOCATED IN: in 7 components; EXPRESSED IN: 26 plant structures; EXPRESSED DURING: 14 growth stages; CONTAINS InterPro DOMAIN/s: Chaperonin Cpn60/TCP-1 (InterPro:IPR002423), Chaperonin Cpn60, conserved site (InterPro:IPR018370), …
Bin: 1.3.13	PS.calvin cycle.rubisco interacting
	Id: seq_19524
	(at4g20130 : 670.0) plastid transcriptionally active 14 (PTAC14); LOCATED IN: plastid chromosome, chloroplast, nucleoid; EXPRESSED IN: 22 plant structures; EXPRESSED DURING: 13 growth stages; CONTAINS InterPro DOMAIN/s: SET domain (InterPro:IPR001214), Rubisco LSMT substrate-binding (InterPro:IPR015353); BEST Arabidopsis thaliana protein match is: Rubisco methyltransferase family protein (TAIR:AT…
Bin: 1.3.13	PS.calvin cycle.rubisco interacting
	Id: seq_19910
	(q40281|rca_maldo : 166.0) Ribulose bisphosphate carboxylase/oxygenase activase, chloroplast precursor (RuBisCO activase) (RA) - Malus domestica (Apple) (Malus sylvestris) & (at2g39730 : 147.0) Rubisco activase, a nuclear-encoded chloroplast protein that consists of two isoforms arising from alternative splicing in most plants. Required for the light activation of rubisco.; rubisco activase (RCA)…
Bin: 1.3.13	PS.calvin cycle.rubisco interacting
	Id: seq_20297
	(p93431|rca_orysa : 158.0) Ribulose bisphosphate carboxylase/oxygenase activase, chloroplast precursor (RuBisCO activase) (RA) - Oryza sativa (Rice) & (at2g39730 : 155.0) Rubisco activase, a nuclear-encoded chloroplast protein that consists of two isoforms arising from alternative splicing in most plants. Required for the light activation of rubisco.; rubisco activase (RCA); FUNCTIONS IN: enzyme …
Bin: 1.3.13	PS.calvin cycle.rubisco interacting
	Id: seq_21401
	(p08824|ruba_ricco : 308.0) RuBisCO large subunit-binding protein subunit alpha (60 kDa chaperonin subunit alpha) (CPN-60 alpha) (Fragment) - Ricinus communis (Castor bean) & (at2g28000 : 302.0) Encodes chaperonin-60 alpha, a molecular chaperone involved in Rubisco folding. Mutants display aberrant chloroplast and embryo development.; chaperonin-60alpha (CPN60A); FUNCTIONS IN: ATP binding; INVOLV…
Bin: 1.3.13	PS.calvin cycle.rubisco interacting
	Id: seq_21893
	(at1g73110 : 588.0) P-loop containing nucleoside triphosphate hydrolases superfamily protein; FUNCTIONS IN: ATPase activity, ATP binding; LOCATED IN: chloroplast thylakoid membrane, chloroplast; EXPRESSED IN: 21 plant structures; EXPRESSED DURING: 13 growth stages; CONTAINS InterPro DOMAIN/s: ATPase, AAA-type, core (InterPro:IPR003959); BEST Arabidopsis thaliana protein match is: rubisco activase…
Bin: 1.3.13	PS.calvin cycle.rubisco interacting
	Id: seq_24801
	(at5g18820 : 174.0) embryo defective 3007 (EMB3007); FUNCTIONS IN: ATP binding; INVOLVED IN: embryo development ending in seed dormancy; LOCATED IN: chloroplast, cytoplasm; EXPRESSED IN: 14 plant structures; EXPRESSED DURING: 8 growth stages; CONTAINS InterPro DOMAIN/s: Chaperonin Cpn60/TCP-1 (InterPro:IPR002423), Chaperonin Cpn60 (InterPro:IPR001844); BEST Arabidopsis thaliana protein match is: …
Bin: 1.3.13	PS.calvin cycle.rubisco interacting
	Id: seq_25657
	(q40281|rca_maldo : 92.8) Ribulose bisphosphate carboxylase/oxygenase activase, chloroplast precursor (RuBisCO activase) (RA) - Malus domestica (Apple) (Malus sylvestris) & (at2g39730 : 82.8) Rubisco activase, a nuclear-encoded chloroplast protein that consists of two isoforms arising from alternative splicing in most plants. Required for the light activation of rubisco.; rubisco activase (RCA); …
Bin: 1.3.13	PS.calvin cycle.rubisco interacting
	Id: seq_29712
	(q43088|rbcmt_pea : 224.0) Ribulose-1,5 bisphosphate carboxylase/oxygenase large subunit N-methyltransferase, chloroplast precursor (EC 2.1.1.127) ([Ribulose-bisphosphate carboxylase]-lysine N-methyltransferase) (RuBisCO methyltransferase) (RuBisCO LSMT) (rbcMT) - & (at1g14030 : 207.0) Rubisco methyltransferase family protein; FUNCTIONS IN: [ribulose-bisphosphate carboxylase]-lysine N-methyltrans…
Bin: 1.3.13	PS.calvin cycle.rubisco interacting
	Id: seq_34410
	(at4g20130 : 121.0) plastid transcriptionally active 14 (PTAC14); LOCATED IN: plastid chromosome, chloroplast, nucleoid; EXPRESSED IN: 22 plant structures; EXPRESSED DURING: 13 growth stages; CONTAINS InterPro DOMAIN/s: SET domain (InterPro:IPR001214), Rubisco LSMT substrate-binding (InterPro:IPR015353); BEST Arabidopsis thaliana protein match is: Rubisco methyltransferase family protein (TAIR:AT…
Bin: 1.3.13	PS.calvin cycle.rubisco interacting
	Id: seq_44894
	(p08927|rubb_pea : 159.0) RuBisCO large subunit-binding protein subunit beta, chloroplast precursor (60 kDa chaperonin subunit beta) (CPN-60 beta) - Pisum sativum (Garden pea) & (at3g13470 : 157.0) TCP-1/cpn60 chaperonin family protein; FUNCTIONS IN: ATP binding; INVOLVED IN: protein folding, protein refolding, cellular protein metabolic process; LOCATED IN: in 7 components; EXPRESSED IN: 26 plan…
Bin: 1.3.13	PS.calvin cycle.rubisco interacting
	Id: seq_47595
	(at5g18820 : 110.0) embryo defective 3007 (EMB3007); FUNCTIONS IN: ATP binding; INVOLVED IN: embryo development ending in seed dormancy; LOCATED IN: chloroplast, cytoplasm; EXPRESSED IN: 14 plant structures; EXPRESSED DURING: 8 growth stages; CONTAINS InterPro DOMAIN/s: Chaperonin Cpn60/TCP-1 (InterPro:IPR002423), Chaperonin Cpn60 (InterPro:IPR001844); BEST Arabidopsis thaliana protein match is: …
Bin: 1.3.13	PS.calvin cycle.rubisco interacting
	Id: seq_49207
	(at1g26230 : 111.0) TCP-1/cpn60 chaperonin family protein; FUNCTIONS IN: ATP binding; INVOLVED IN: protein refolding, cellular protein metabolic process; EXPRESSED IN: 22 plant structures; EXPRESSED DURING: 13 growth stages; CONTAINS InterPro DOMAIN/s: Chaperonin Cpn60/TCP-1 (InterPro:IPR002423), Chaperonin Cpn60 (InterPro:IPR001844); BEST Arabidopsis thaliana protein match is: chaperonin 60 beta…
Bin: 1.3.13	PS.calvin cycle.rubisco interacting
	Id: seq_53728
	(at5g18820 : 171.0) embryo defective 3007 (EMB3007); FUNCTIONS IN: ATP binding; INVOLVED IN: embryo development ending in seed dormancy; LOCATED IN: chloroplast, cytoplasm; EXPRESSED IN: 14 plant structures; EXPRESSED DURING: 8 growth stages; CONTAINS InterPro DOMAIN/s: Chaperonin Cpn60/TCP-1 (InterPro:IPR002423), Chaperonin Cpn60 (InterPro:IPR001844); BEST Arabidopsis thaliana protein match is: …
Bin: 1.3.13	PS.calvin cycle.rubisco interacting
	Id: seq_55045
	(at5g18820 : 158.0) embryo defective 3007 (EMB3007); FUNCTIONS IN: ATP binding; INVOLVED IN: embryo development ending in seed dormancy; LOCATED IN: chloroplast, cytoplasm; EXPRESSED IN: 14 plant structures; EXPRESSED DURING: 8 growth stages; CONTAINS InterPro DOMAIN/s: Chaperonin Cpn60/TCP-1 (InterPro:IPR002423), Chaperonin Cpn60 (InterPro:IPR001844); BEST Arabidopsis thaliana protein match is: …
Bin: 1.3.13	PS.calvin cycle.rubisco interacting
	Id: seq_61443
	(p08927|rubb_pea : 205.0) RuBisCO large subunit-binding protein subunit beta, chloroplast precursor (60 kDa chaperonin subunit beta) (CPN-60 beta) - Pisum sativum (Garden pea) & (at3g13470 : 200.0) TCP-1/cpn60 chaperonin family protein; FUNCTIONS IN: ATP binding; INVOLVED IN: protein folding, protein refolding, cellular protein metabolic process; LOCATED IN: in 7 components; EXPRESSED IN: 26 plan…
Bin: 1.3.13	PS.calvin cycle.rubisco interacting
	Id: seq_64334
	(at1g73110 : 188.0) P-loop containing nucleoside triphosphate hydrolases superfamily protein; FUNCTIONS IN: ATPase activity, ATP binding; LOCATED IN: chloroplast thylakoid membrane, chloroplast; EXPRESSED IN: 21 plant structures; EXPRESSED DURING: 13 growth stages; CONTAINS InterPro DOMAIN/s: ATPase, AAA-type, core (InterPro:IPR003959); BEST Arabidopsis thaliana protein match is: rubisco activase…
Bin: 1.3.13	PS.calvin cycle.rubisco interacting
	Id: seq_73947
	(q40281|rca_maldo : 116.0) Ribulose bisphosphate carboxylase/oxygenase activase, chloroplast precursor (RuBisCO activase) (RA) - Malus domestica (Apple) (Malus sylvestris) & (at2g39730 : 114.0) Rubisco activase, a nuclear-encoded chloroplast protein that consists of two isoforms arising from alternative splicing in most plants. Required for the light activation of rubisco.; rubisco activase (RCA)…
Bin: 1.3.13	PS.calvin cycle.rubisco interacting
	Id: seq_77664
	(p93431|rca_orysa : 207.0) Ribulose bisphosphate carboxylase/oxygenase activase, chloroplast precursor (RuBisCO activase) (RA) - Oryza sativa (Rice) & (at2g39730 : 202.0) Rubisco activase, a nuclear-encoded chloroplast protein that consists of two isoforms arising from alternative splicing in most plants. Required for the light activation of rubisco.; rubisco activase (RCA); FUNCTIONS IN: enzyme …
Bin: 1.3.13	PS.calvin cycle.rubisco interacting
	Id: seq_79213
	(at1g73110 : 214.0) P-loop containing nucleoside triphosphate hydrolases superfamily protein; FUNCTIONS IN: ATPase activity, ATP binding; LOCATED IN: chloroplast thylakoid membrane, chloroplast; EXPRESSED IN: 21 plant structures; EXPRESSED DURING: 13 growth stages; CONTAINS InterPro DOMAIN/s: ATPase, AAA-type, core (InterPro:IPR003959); BEST Arabidopsis thaliana protein match is: rubisco activase…
Bin: 1.3.13	PS.calvin cycle.rubisco interacting
	Id: seq_79609
	(at1g73110 : 314.0) P-loop containing nucleoside triphosphate hydrolases superfamily protein; FUNCTIONS IN: ATPase activity, ATP binding; LOCATED IN: chloroplast thylakoid membrane, chloroplast; EXPRESSED IN: 21 plant structures; EXPRESSED DURING: 13 growth stages; CONTAINS InterPro DOMAIN/s: ATPase, AAA-type, core (InterPro:IPR003959); BEST Arabidopsis thaliana protein match is: rubisco activase…
Bin: 1.3.13	PS.calvin cycle.rubisco interacting
	Id: seq_81520
	(q40281|rca_maldo : 192.0) Ribulose bisphosphate carboxylase/oxygenase activase, chloroplast precursor (RuBisCO activase) (RA) - Malus domestica (Apple) (Malus sylvestris) & (at2g39730 : 172.0) Rubisco activase, a nuclear-encoded chloroplast protein that consists of two isoforms arising from alternative splicing in most plants. Required for the light activation of rubisco.; rubisco activase (RCA)…
Bin: 1.3.13	PS.calvin cycle.rubisco interacting
	Id: seq_87023
	(o98997|rca_phaau : 192.0) Ribulose bisphosphate carboxylase/oxygenase activase, chloroplast precursor (RuBisCO activase) (RA) - Phaseolus aureus (Mung bean) (Vigna radiata) & (at2g39730 : 174.0) Rubisco activase, a nuclear-encoded chloroplast protein that consists of two isoforms arising from alternative splicing in most plants. Required for the light activation of rubisco.; rubisco activase (RC…
Bin: 1.3.13	PS.calvin cycle.rubisco interacting
	Id: seq_90710
	(p21239|rub1_brana : 104.0) RuBisCO large subunit-binding protein subunit alpha, chloroplast precursor (60 kDa chaperonin subunit alpha) (CPN-60 alpha) (Fragment) - Brassica napus (Rape) & (at2g28000 : 103.0) Encodes chaperonin-60 alpha, a molecular chaperone involved in Rubisco folding. Mutants display aberrant chloroplast and embryo development.; chaperonin-60alpha (CPN60A); FUNCTIONS IN: ATP b…
Bin: 1.3.13	PS.calvin cycle.rubisco interacting
	Id: seq_99282
	(at5g18820 : 99.4) embryo defective 3007 (EMB3007); FUNCTIONS IN: ATP binding; INVOLVED IN: embryo development ending in seed dormancy; LOCATED IN: chloroplast, cytoplasm; EXPRESSED IN: 14 plant structures; EXPRESSED DURING: 8 growth stages; CONTAINS InterPro DOMAIN/s: Chaperonin Cpn60/TCP-1 (InterPro:IPR002423), Chaperonin Cpn60 (InterPro:IPR001844); BEST Arabidopsis thaliana protein match is: c…
Bin: 1.3.13	PS.calvin cycle.rubisco interacting
	Id: seq_108509
	(q40281|rca_maldo : 137.0) Ribulose bisphosphate carboxylase/oxygenase activase, chloroplast precursor (RuBisCO activase) (RA) - Malus domestica (Apple) (Malus sylvestris) & (at2g39730 : 116.0) Rubisco activase, a nuclear-encoded chloroplast protein that consists of two isoforms arising from alternative splicing in most plants. Required for the light activation of rubisco.; rubisco activase (RCA)…
Bin: 1.3.13	PS.calvin cycle.rubisco interacting
	Id: seq_118120
	(p94026|rbcmt_tobac : 114.0) Ribulose-1,5 bisphosphate carboxylase/oxygenase large subunit N-methyltransferase, chloroplast precursor (EC 2.1.1.127) ([Ribulose-bisphosphate carboxylase]-lysine N-methyltransferase) (RuBisCO methyltransferase) (RuBisCO LSMT) (rbcMT) & (at1g14030 : 112.0) Rubisco methyltransferase family protein; FUNCTIONS IN: [ribulose-bisphosphate carboxylase]-lysine N-methyltrans…
Bin: 1.3.12	PS.calvin cycle.PRK
	Id: seq_9607
	(p27774|kppr_mescr : 672.0) Phosphoribulokinase, chloroplast precursor (EC 2.7.1.19) (Phosphopentokinase) (PRKase) (PRK) - Mesembryanthemum crystallinum (Common ice plant) & (at1g32060 : 657.0) phosphoribulokinase (PRK); FUNCTIONS IN: protein binding, phosphoribulokinase activity, ATP binding; INVOLVED IN: response to cold, defense response to bacterium, biosynthetic process, peptidyl-cysteine S-…
Bin: 1.3.12	PS.calvin cycle.PRK
	Id: seq_25807
	(p26302|kppr_wheat : 246.0) Phosphoribulokinase, chloroplast precursor (EC 2.7.1.19) (Phosphopentokinase) (PRKase) (PRK) - Triticum aestivum (Wheat) & (at1g32060 : 238.0) phosphoribulokinase (PRK); FUNCTIONS IN: protein binding, phosphoribulokinase activity, ATP binding; INVOLVED IN: response to cold, defense response to bacterium, biosynthetic process, peptidyl-cysteine S-nitrosylation; LOCATED …
Bin: 1.3.11	PS.calvin cycle.RPE
	Id: seq_56
	(q43157|rpe_spiol : 443.0) Ribulose-phosphate 3-epimerase, chloroplast precursor (EC 5.1.3.1) (Pentose-5-phosphate 3-epimerase) (PPE) (RPE) (R5P3E) - Spinacia oleracea (Spinach) & (at5g61410 : 435.0) Arabidopsis thaliana ribulose-5-phosphate-3-epimerase mRNA; D-ribulose-5-phosphate-3-epimerase (RPE); FUNCTIONS IN: ribulose-phosphate 3-epimerase activity, catalytic activity; INVOLVED IN: response …
Bin: 1.3.11	PS.calvin cycle.RPE
	Id: seq_57
	(q43157|rpe_spiol : 148.0) Ribulose-phosphate 3-epimerase, chloroplast precursor (EC 5.1.3.1) (Pentose-5-phosphate 3-epimerase) (PPE) (RPE) (R5P3E) - Spinacia oleracea (Spinach) & (at5g61410 : 138.0) Arabidopsis thaliana ribulose-5-phosphate-3-epimerase mRNA; D-ribulose-5-phosphate-3-epimerase (RPE); FUNCTIONS IN: ribulose-phosphate 3-epimerase activity, catalytic activity; INVOLVED IN: response …
Bin: 1.3.11	PS.calvin cycle.RPE
	Id: seq_11018
	(q9ztp5|rpe_orysa : 148.0) Ribulose-phosphate 3-epimerase, chloroplast precursor (EC 5.1.3.1) (Pentose-5-phosphate 3-epimerase) (PPE) (RPE) (R5P3E) - Oryza sativa (Rice) & (at5g61410 : 146.0) Arabidopsis thaliana ribulose-5-phosphate-3-epimerase mRNA; D-ribulose-5-phosphate-3-epimerase (RPE); FUNCTIONS IN: ribulose-phosphate 3-epimerase activity, catalytic activity; INVOLVED IN: response to cold,…
Bin: 1.3.11	PS.calvin cycle.RPE
	Id: seq_25869
	(q43157|rpe_spiol : 134.0) Ribulose-phosphate 3-epimerase, chloroplast precursor (EC 5.1.3.1) (Pentose-5-phosphate 3-epimerase) (PPE) (RPE) (R5P3E) - Spinacia oleracea (Spinach) & (at5g61410 : 128.0) Arabidopsis thaliana ribulose-5-phosphate-3-epimerase mRNA; D-ribulose-5-phosphate-3-epimerase (RPE); FUNCTIONS IN: ribulose-phosphate 3-epimerase activity, catalytic activity; INVOLVED IN: response …
Bin: 1.3.11	PS.calvin cycle.RPE
	Id: seq_26309
	(at5g61410 : 180.0) Arabidopsis thaliana ribulose-5-phosphate-3-epimerase mRNA; D-ribulose-5-phosphate-3-epimerase (RPE); FUNCTIONS IN: ribulose-phosphate 3-epimerase activity, catalytic activity; INVOLVED IN: response to cold, carbohydrate metabolic process, response to nematode, embryo development ending in seed dormancy; LOCATED IN: thylakoid, apoplast, stromule, chloroplast, chloroplast envel…
Bin: 1.3.11	PS.calvin cycle.RPE
	Id: seq_31231
	(q43843|rpe_soltu : 206.0) Ribulose-phosphate 3-epimerase, chloroplast precursor (EC 5.1.3.1) (Pentose-5-phosphate 3-epimerase) (PPE) (RPE) (R5P3E) (Fragment) - Solanum tuberosum (Potato) & (at5g61410 : 202.0) Arabidopsis thaliana ribulose-5-phosphate-3-epimerase mRNA; D-ribulose-5-phosphate-3-epimerase (RPE); FUNCTIONS IN: ribulose-phosphate 3-epimerase activity, catalytic activity; INVOLVED IN:…
Bin: 1.3.10	PS.calvin cycle.Rib5P Isomerase
	Id: seq_21159
	(at5g44520 : 149.0) NagB/RpiA/CoA transferase-like superfamily protein; FUNCTIONS IN: ribose-5-phosphate isomerase activity; INVOLVED IN: glucose catabolic process to lactate and acetate, 5-phosphoribose 1-diphosphate biosynthetic process, reductive pentose-phosphate cycle, D-ribose catabolic process, pentose-phosphate shunt, non-oxidative branch; LOCATED IN: chloroplast; EXPRESSED IN: 24 plant s…
Bin: 1.3.10	PS.calvin cycle.Rib5P Isomerase
	Id: seq_24264
	(at5g44520 : 90.1) NagB/RpiA/CoA transferase-like superfamily protein; FUNCTIONS IN: ribose-5-phosphate isomerase activity; INVOLVED IN: glucose catabolic process to lactate and acetate, 5-phosphoribose 1-diphosphate biosynthetic process, reductive pentose-phosphate cycle, D-ribose catabolic process, pentose-phosphate shunt, non-oxidative branch; LOCATED IN: chloroplast; EXPRESSED IN: 24 plant st…
Bin: 1.3.10	PS.calvin cycle.Rib5P Isomerase
	Id: seq_40185
	(at5g44520 : 98.6) NagB/RpiA/CoA transferase-like superfamily protein; FUNCTIONS IN: ribose-5-phosphate isomerase activity; INVOLVED IN: glucose catabolic process to lactate and acetate, 5-phosphoribose 1-diphosphate biosynthetic process, reductive pentose-phosphate cycle, D-ribose catabolic process, pentose-phosphate shunt, non-oxidative branch; LOCATED IN: chloroplast; EXPRESSED IN: 24 plant st…
Bin: 1.3.9	PS.calvin cycle.seduheptulose bisphosphatase
	Id: seq_3932
	(o20252|s17p_spiol : 625.0) Sedoheptulose-1,7-bisphosphatase, chloroplast precursor (EC 3.1.3.37) (Sedoheptulose-bisphosphatase) (SBPase) (SED(1,7)P2ase) - Spinacia oleracea (Spinach) & (at3g55800 : 617.0) Encodes the chloroplast enzyme sedoheptulose-1,7-bisphosphatase (SBPase), involved in the carbon reduction of the Calvin cycle. Increase in SBPase activity in transgenic lines accumulate up to …
Bin: 1.3.9	PS.calvin cycle.seduheptulose bisphosphatase
	Id: seq_17342
	(p46285|s17p_wheat : 155.0) Sedoheptulose-1,7-bisphosphatase, chloroplast precursor (EC 3.1.3.37) (Sedoheptulose-bisphosphatase) (SBPase) (SED(1,7)P2ase) - Triticum aestivum (Wheat) & (at3g55800 : 148.0) Encodes the chloroplast enzyme sedoheptulose-1,7-bisphosphatase (SBPase), involved in the carbon reduction of the Calvin cycle. Increase in SBPase activity in transgenic lines accumulate up to 50…
Bin: 1.3.9	PS.calvin cycle.seduheptulose bisphosphatase
	Id: seq_17590
	(p46285|s17p_wheat : 214.0) Sedoheptulose-1,7-bisphosphatase, chloroplast precursor (EC 3.1.3.37) (Sedoheptulose-bisphosphatase) (SBPase) (SED(1,7)P2ase) - Triticum aestivum (Wheat) & (at3g55800 : 211.0) Encodes the chloroplast enzyme sedoheptulose-1,7-bisphosphatase (SBPase), involved in the carbon reduction of the Calvin cycle. Increase in SBPase activity in transgenic lines accumulate up to 50…
Bin: 1.3.9	PS.calvin cycle.seduheptulose bisphosphatase
	Id: seq_56684
	(o20252|s17p_spiol : 102.0) Sedoheptulose-1,7-bisphosphatase, chloroplast precursor (EC 3.1.3.37) (Sedoheptulose-bisphosphatase) (SBPase) (SED(1,7)P2ase) - Spinacia oleracea (Spinach) & (at3g55800 : 101.0) Encodes the chloroplast enzyme sedoheptulose-1,7-bisphosphatase (SBPase), involved in the carbon reduction of the Calvin cycle. Increase in SBPase activity in transgenic lines accumulate up to …
Bin: 1.3.8	PS.calvin cycle.transketolase
	Id: seq_84
	(q7sic9|tktc_maize : 485.0) Transketolase, chloroplast (EC 2.2.1.1) (TK) - Zea mays (Maize) & (at2g45290 : 469.0) Transketolase; FUNCTIONS IN: catalytic activity, transketolase activity; INVOLVED IN: response to cadmium ion; LOCATED IN: chloroplast stroma, chloroplast; EXPRESSED IN: 25 plant structures; EXPRESSED DURING: 16 growth stages; CONTAINS InterPro DOMAIN/s: Transketolase, bacterial-like …
Bin: 1.3.8	PS.calvin cycle.transketolase
	Id: seq_1899
	(at3g60750 : 205.0) Transketolase; FUNCTIONS IN: catalytic activity, transketolase activity; EXPRESSED IN: 24 plant structures; EXPRESSED DURING: 16 growth stages; CONTAINS InterPro DOMAIN/s: Transketolase, N-terminal (InterPro:IPR005474), Transketolase, C-terminal (InterPro:IPR005476), Transketolase, C-terminal/Pyruvate-ferredoxin oxidoreductase, domain II (InterPro:IPR009014), Transketolase-lik…
Bin: 1.3.8	PS.calvin cycle.transketolase
	Id: seq_2332
	(q7sic9|tktc_maize : 186.0) Transketolase, chloroplast (EC 2.2.1.1) (TK) - Zea mays (Maize) & (at3g60750 : 180.0) Transketolase; FUNCTIONS IN: catalytic activity, transketolase activity; EXPRESSED IN: 24 plant structures; EXPRESSED DURING: 16 growth stages; CONTAINS InterPro DOMAIN/s: Transketolase, N-terminal (InterPro:IPR005474), Transketolase, C-terminal (InterPro:IPR005476), Transketolase, C-…
Bin: 1.3.8	PS.calvin cycle.transketolase
	Id: seq_12715
	(q43848|tktc_soltu : 236.0) Transketolase, chloroplast precursor (EC 2.2.1.1) (TK) - Solanum tuberosum (Potato) & (at2g45290 : 231.0) Transketolase; FUNCTIONS IN: catalytic activity, transketolase activity; INVOLVED IN: response to cadmium ion; LOCATED IN: chloroplast stroma, chloroplast; EXPRESSED IN: 25 plant structures; EXPRESSED DURING: 16 growth stages; CONTAINS InterPro DOMAIN/s: Transketol…
Bin: 1.3.8	PS.calvin cycle.transketolase
	Id: seq_14373
	(at2g45290 : 165.0) Transketolase; FUNCTIONS IN: catalytic activity, transketolase activity; INVOLVED IN: response to cadmium ion; LOCATED IN: chloroplast stroma, chloroplast; EXPRESSED IN: 25 plant structures; EXPRESSED DURING: 16 growth stages; CONTAINS InterPro DOMAIN/s: Transketolase, bacterial-like (InterPro:IPR005478), Transketolase, N-terminal (InterPro:IPR005474), Transketolase, C-termina…
Bin: 1.3.8	PS.calvin cycle.transketolase
	Id: seq_19611
	(q7sic9|tktc_maize : 116.0) Transketolase, chloroplast (EC 2.2.1.1) (TK) - Zea mays (Maize) & (at2g45290 : 114.0) Transketolase; FUNCTIONS IN: catalytic activity, transketolase activity; INVOLVED IN: response to cadmium ion; LOCATED IN: chloroplast stroma, chloroplast; EXPRESSED IN: 25 plant structures; EXPRESSED DURING: 16 growth stages; CONTAINS InterPro DOMAIN/s: Transketolase, bacterial-like …
Bin: 1.3.8	PS.calvin cycle.transketolase
	Id: seq_20139
	(q7sic9|tktc_maize : 137.0) Transketolase, chloroplast (EC 2.2.1.1) (TK) - Zea mays (Maize) & (at2g45290 : 134.0) Transketolase; FUNCTIONS IN: catalytic activity, transketolase activity; INVOLVED IN: response to cadmium ion; LOCATED IN: chloroplast stroma, chloroplast; EXPRESSED IN: 25 plant structures; EXPRESSED DURING: 16 growth stages; CONTAINS InterPro DOMAIN/s: Transketolase, bacterial-like …
Bin: 1.3.8	PS.calvin cycle.transketolase
	Id: seq_20196
	(at3g60750 : 135.0) Transketolase; FUNCTIONS IN: catalytic activity, transketolase activity; EXPRESSED IN: 24 plant structures; EXPRESSED DURING: 16 growth stages; CONTAINS InterPro DOMAIN/s: Transketolase, N-terminal (InterPro:IPR005474), Transketolase, C-terminal (InterPro:IPR005476), Transketolase, C-terminal/Pyruvate-ferredoxin oxidoreductase, domain II (InterPro:IPR009014), Transketolase-lik…
Bin: 1.3.8	PS.calvin cycle.transketolase
	Id: seq_20374
	(q7sic9|tktc_maize : 167.0) Transketolase, chloroplast (EC 2.2.1.1) (TK) - Zea mays (Maize) & (at3g60750 : 165.0) Transketolase; FUNCTIONS IN: catalytic activity, transketolase activity; EXPRESSED IN: 24 plant structures; EXPRESSED DURING: 16 growth stages; CONTAINS InterPro DOMAIN/s: Transketolase, N-terminal (InterPro:IPR005474), Transketolase, C-terminal (InterPro:IPR005476), Transketolase, C-…
Bin: 1.3.8	PS.calvin cycle.transketolase
	Id: seq_21745
	(at3g60750 : 186.0) Transketolase; FUNCTIONS IN: catalytic activity, transketolase activity; EXPRESSED IN: 24 plant structures; EXPRESSED DURING: 16 growth stages; CONTAINS InterPro DOMAIN/s: Transketolase, N-terminal (InterPro:IPR005474), Transketolase, C-terminal (InterPro:IPR005476), Transketolase, C-terminal/Pyruvate-ferredoxin oxidoreductase, domain II (InterPro:IPR009014), Transketolase-lik…
Bin: 1.3.8	PS.calvin cycle.transketolase
	Id: seq_21982
	(q43848|tktc_soltu : 125.0) Transketolase, chloroplast precursor (EC 2.2.1.1) (TK) - Solanum tuberosum (Potato) & (at3g60750 : 123.0) Transketolase; FUNCTIONS IN: catalytic activity, transketolase activity; EXPRESSED IN: 24 plant structures; EXPRESSED DURING: 16 growth stages; CONTAINS InterPro DOMAIN/s: Transketolase, N-terminal (InterPro:IPR005474), Transketolase, C-terminal (InterPro:IPR005476…
Bin: 1.3.8	PS.calvin cycle.transketolase
	Id: seq_22140
	(at2g45290 : 147.0) Transketolase; FUNCTIONS IN: catalytic activity, transketolase activity; INVOLVED IN: response to cadmium ion; LOCATED IN: chloroplast stroma, chloroplast; EXPRESSED IN: 25 plant structures; EXPRESSED DURING: 16 growth stages; CONTAINS InterPro DOMAIN/s: Transketolase, bacterial-like (InterPro:IPR005478), Transketolase, N-terminal (InterPro:IPR005474), Transketolase, C-termina…
Bin: 1.3.8	PS.calvin cycle.transketolase
	Id: seq_62379
	(at2g45290 : 149.0) Transketolase; FUNCTIONS IN: catalytic activity, transketolase activity; INVOLVED IN: response to cadmium ion; LOCATED IN: chloroplast stroma, chloroplast; EXPRESSED IN: 25 plant structures; EXPRESSED DURING: 16 growth stages; CONTAINS InterPro DOMAIN/s: Transketolase, bacterial-like (InterPro:IPR005478), Transketolase, N-terminal (InterPro:IPR005474), Transketolase, C-termina…
Bin: 1.3.8	PS.calvin cycle.transketolase
	Id: seq_100156
	(q7sic9|tktc_maize : 88.2) Transketolase, chloroplast (EC 2.2.1.1) (TK) - Zea mays (Maize) & (at3g60750 : 86.3) Transketolase; FUNCTIONS IN: catalytic activity, transketolase activity; EXPRESSED IN: 24 plant structures; EXPRESSED DURING: 16 growth stages; CONTAINS InterPro DOMAIN/s: Transketolase, N-terminal (InterPro:IPR005474), Transketolase, C-terminal (InterPro:IPR005476), Transketolase, C-te…
Bin: 1.3.7	PS.calvin cycle.FBPase
	Id: seq_552
	(p46275|f16p1_pea : 605.0) Fructose-1,6-bisphosphatase, chloroplast precursor (EC 3.1.3.11) (D-fructose-1,6-bisphosphate 1-phosphohydrolase) (FBPase) - Pisum sativum (Garden pea) & (at3g54050 : 593.0) Encodes HCEF1 (High Cyclic Electron Flow 1). Mutant phenotype: constitutively elevated electron flow (CEFI).; high cyclic electron flow 1 (HCEF1); FUNCTIONS IN: fructose 1,6-bisphosphate 1-phosphata…
Bin: 1.3.7	PS.calvin cycle.FBPase
	Id: seq_8425
	(at5g64380 : 563.0) Inositol monophosphatase family protein; FUNCTIONS IN: phosphoric ester hydrolase activity; INVOLVED IN: carbohydrate metabolic process; LOCATED IN: chloroplast; EXPRESSED IN: 21 plant structures; EXPRESSED DURING: 13 growth stages; CONTAINS InterPro DOMAIN/s: Fructose-1,6-bisphosphatase (InterPro:IPR000146); BEST Arabidopsis thaliana protein match is: high cyclic electron flo…
Bin: 1.3.7	PS.calvin cycle.FBPase
	Id: seq_10911
	(p22418|f16p1_spiol : 524.0) Fructose-1,6-bisphosphatase, chloroplast precursor (EC 3.1.3.11) (D-fructose-1,6-bisphosphate 1-phosphohydrolase) (FBPase) - Spinacia oleracea (Spinach) & (at3g54050 : 517.0) Encodes HCEF1 (High Cyclic Electron Flow 1). Mutant phenotype: constitutively elevated electron flow (CEFI).; high cyclic electron flow 1 (HCEF1); FUNCTIONS IN: fructose 1,6-bisphosphate 1-phosph…
Bin: 1.3.7	PS.calvin cycle.FBPase
	Id: seq_16108
	(q07204|f16p1_brana : 117.0) Fructose-1,6-bisphosphatase, chloroplast precursor (EC 3.1.3.11) (D-fructose-1,6-bisphosphate 1-phosphohydrolase) (FBPase) - Brassica napus (Rape) & (at3g54050 : 116.0) Encodes HCEF1 (High Cyclic Electron Flow 1). Mutant phenotype: constitutively elevated electron flow (CEFI).; high cyclic electron flow 1 (HCEF1); FUNCTIONS IN: fructose 1,6-bisphosphate 1-phosphatase …
Bin: 1.3.7	PS.calvin cycle.FBPase
	Id: seq_26651
	(o64422|f16p1_orysa : 189.0) Fructose-1,6-bisphosphatase, chloroplast precursor (EC 3.1.3.11) (D-fructose-1,6-bisphosphate 1-phosphohydrolase) (FBPase) - Oryza sativa (Rice) & (at3g54050 : 183.0) Encodes HCEF1 (High Cyclic Electron Flow 1). Mutant phenotype: constitutively elevated electron flow (CEFI).; high cyclic electron flow 1 (HCEF1); FUNCTIONS IN: fructose 1,6-bisphosphate 1-phosphatase ac…
Bin: 1.3.7	PS.calvin cycle.FBPase
	Id: seq_40597
	(at5g64380 : 84.0) Inositol monophosphatase family protein; FUNCTIONS IN: phosphoric ester hydrolase activity; INVOLVED IN: carbohydrate metabolic process; LOCATED IN: chloroplast; EXPRESSED IN: 21 plant structures; EXPRESSED DURING: 13 growth stages; CONTAINS InterPro DOMAIN/s: Fructose-1,6-bisphosphatase (InterPro:IPR000146); BEST Arabidopsis thaliana protein match is: high cyclic electron flow…
Bin: 1.3.7	PS.calvin cycle.FBPase
	Id: seq_43081
	(p22418|f16p1_spiol : 101.0) Fructose-1,6-bisphosphatase, chloroplast precursor (EC 3.1.3.11) (D-fructose-1,6-bisphosphate 1-phosphohydrolase) (FBPase) - Spinacia oleracea (Spinach) & (at3g54050 : 90.1) Encodes HCEF1 (High Cyclic Electron Flow 1). Mutant phenotype: constitutively elevated electron flow (CEFI).; high cyclic electron flow 1 (HCEF1); FUNCTIONS IN: fructose 1,6-bisphosphate 1-phospha…
Bin: 1.3.7	PS.calvin cycle.FBPase
	Id: seq_77553
	(at5g64380 : 102.0) Inositol monophosphatase family protein; FUNCTIONS IN: phosphoric ester hydrolase activity; INVOLVED IN: carbohydrate metabolic process; LOCATED IN: chloroplast; EXPRESSED IN: 21 plant structures; EXPRESSED DURING: 13 growth stages; CONTAINS InterPro DOMAIN/s: Fructose-1,6-bisphosphatase (InterPro:IPR000146); BEST Arabidopsis thaliana protein match is: high cyclic electron flo…
Bin: 1.3.7	PS.calvin cycle.FBPase
	Id: seq_110425
	(at5g64380 : 92.0) Inositol monophosphatase family protein; FUNCTIONS IN: phosphoric ester hydrolase activity; INVOLVED IN: carbohydrate metabolic process; LOCATED IN: chloroplast; EXPRESSED IN: 21 plant structures; EXPRESSED DURING: 13 growth stages; CONTAINS InterPro DOMAIN/s: Fructose-1,6-bisphosphatase (InterPro:IPR000146); BEST Arabidopsis thaliana protein match is: high cyclic electron flow…
Bin: 1.3.6	PS.calvin cycle.aldolase
	Id: seq_413
	(at2g36460 : 591.0) Aldolase superfamily protein; FUNCTIONS IN: copper ion binding; INVOLVED IN: response to salt stress, pentose-phosphate shunt; LOCATED IN: mitochondrion, plasma membrane, membrane; EXPRESSED IN: 24 plant structures; EXPRESSED DURING: 14 growth stages; CONTAINS InterPro DOMAIN/s: Aldolase-type TIM barrel (InterPro:IPR013785), Fructose-bisphosphate aldolase, class-I (InterPro:IP…
Bin: 1.3.6	PS.calvin cycle.aldolase
	Id: seq_455
	(at4g38970 : 678.0) Protein is tyrosine-phosphorylated and its phosphorylation state is modulated in response to ABA in Arabidopsis thaliana seeds.; fructose-bisphosphate aldolase 2 (FBA2); FUNCTIONS IN: fructose-bisphosphate aldolase activity, catalytic activity; INVOLVED IN: response to cadmium ion, pentose-phosphate shunt, response to abscisic acid stimulus; LOCATED IN: in 6 components; EXPRES…
Bin: 1.3.6	PS.calvin cycle.aldolase
	Id: seq_1583
	(at2g01140 : 657.0) Aldolase superfamily protein; FUNCTIONS IN: fructose-bisphosphate aldolase activity; INVOLVED IN: response to oxidative stress, response to cadmium ion, pentose-phosphate shunt; LOCATED IN: mitochondrion, chloroplast, plastoglobule; EXPRESSED IN: 25 plant structures; EXPRESSED DURING: 15 growth stages; CONTAINS InterPro DOMAIN/s: Aldolase-type TIM barrel (InterPro:IPR013785), …
Bin: 1.3.6	PS.calvin cycle.aldolase
	Id: seq_2834
	(at4g38970 : 87.4) Protein is tyrosine-phosphorylated and its phosphorylation state is modulated in response to ABA in Arabidopsis thaliana seeds.; fructose-bisphosphate aldolase 2 (FBA2); FUNCTIONS IN: fructose-bisphosphate aldolase activity, catalytic activity; INVOLVED IN: response to cadmium ion, pentose-phosphate shunt, response to abscisic acid stimulus; LOCATED IN: in 6 components; EXPRESS…
Bin: 1.3.6	PS.calvin cycle.aldolase
	Id: seq_3937
	(at2g01140 : 246.0) Aldolase superfamily protein; FUNCTIONS IN: fructose-bisphosphate aldolase activity; INVOLVED IN: response to oxidative stress, response to cadmium ion, pentose-phosphate shunt; LOCATED IN: mitochondrion, chloroplast, plastoglobule; EXPRESSED IN: 25 plant structures; EXPRESSED DURING: 15 growth stages; CONTAINS InterPro DOMAIN/s: Aldolase-type TIM barrel (InterPro:IPR013785), …
Bin: 1.3.6	PS.calvin cycle.aldolase
	Id: seq_6409
	(p46256|alf1_pea : 354.0) Fructose-bisphosphate aldolase, cytoplasmic isozyme 1 (EC 4.1.2.13) - Pisum sativum (Garden pea) & (at4g26530 : 340.0) Aldolase superfamily protein; FUNCTIONS IN: fructose-bisphosphate aldolase activity; INVOLVED IN: glycolysis, metabolic process; EXPRESSED IN: 17 plant structures; EXPRESSED DURING: 11 growth stages; CONTAINS InterPro DOMAIN/s: Aldolase-type TIM barrel (…
Bin: 1.3.6	PS.calvin cycle.aldolase
	Id: seq_10081
	(q40677|alfc_orysa : 181.0) Fructose-bisphosphate aldolase, chloroplast precursor (EC 4.1.2.13) (ALDP) - Oryza sativa (Rice) & (at4g38970 : 171.0) Protein is tyrosine-phosphorylated and its phosphorylation state is modulated in response to ABA in Arabidopsis thaliana seeds.; fructose-bisphosphate aldolase 2 (FBA2); FUNCTIONS IN: fructose-bisphosphate aldolase activity, catalytic activity; INVOLVE…
Bin: 1.3.6	PS.calvin cycle.aldolase
	Id: seq_13961
	(p46257|alf2_pea : 289.0) Fructose-bisphosphate aldolase, cytoplasmic isozyme 2 (EC 4.1.2.13) - Pisum sativum (Garden pea) & (at2g36460 : 287.0) Aldolase superfamily protein; FUNCTIONS IN: copper ion binding; INVOLVED IN: response to salt stress, pentose-phosphate shunt; LOCATED IN: mitochondrion, plasma membrane, membrane; EXPRESSED IN: 24 plant structures; EXPRESSED DURING: 14 growth stages; CO…
Bin: 1.3.6	PS.calvin cycle.aldolase
	Id: seq_18314
	(at2g01140 : 145.0) Aldolase superfamily protein; FUNCTIONS IN: fructose-bisphosphate aldolase activity; INVOLVED IN: response to oxidative stress, response to cadmium ion, pentose-phosphate shunt; LOCATED IN: mitochondrion, chloroplast, plastoglobule; EXPRESSED IN: 25 plant structures; EXPRESSED DURING: 15 growth stages; CONTAINS InterPro DOMAIN/s: Aldolase-type TIM barrel (InterPro:IPR013785), …
Bin: 1.3.6	PS.calvin cycle.aldolase
	Id: seq_19446
	(at4g26530 : 307.0) Aldolase superfamily protein; FUNCTIONS IN: fructose-bisphosphate aldolase activity; INVOLVED IN: glycolysis, metabolic process; EXPRESSED IN: 17 plant structures; EXPRESSED DURING: 11 growth stages; CONTAINS InterPro DOMAIN/s: Aldolase-type TIM barrel (InterPro:IPR013785), Fructose-bisphosphate aldolase, class-I (InterPro:IPR000741); BEST Arabidopsis thaliana protein match is…
Bin: 1.3.6	PS.calvin cycle.aldolase
	Id: seq_21453
	(p46256|alf1_pea : 131.0) Fructose-bisphosphate aldolase, cytoplasmic isozyme 1 (EC 4.1.2.13) - Pisum sativum (Garden pea) & (at4g26530 : 121.0) Aldolase superfamily protein; FUNCTIONS IN: fructose-bisphosphate aldolase activity; INVOLVED IN: glycolysis, metabolic process; EXPRESSED IN: 17 plant structures; EXPRESSED DURING: 11 growth stages; CONTAINS InterPro DOMAIN/s: Aldolase-type TIM barrel (…
Bin: 1.3.6	PS.calvin cycle.aldolase
	Id: seq_22500
	(p16096|alfc_spiol : 125.0) Fructose-bisphosphate aldolase, chloroplast precursor (EC 4.1.2.13) - Spinacia oleracea (Spinach) & (at2g21330 : 108.0) fructose-bisphosphate aldolase 1 (FBA1); FUNCTIONS IN: fructose-bisphosphate aldolase activity, catalytic activity; INVOLVED IN: response to cadmium ion, pentose-phosphate shunt; LOCATED IN: in 6 components; EXPRESSED IN: 24 plant structures; EXPRESSE…
Bin: 1.3.6	PS.calvin cycle.aldolase
	Id: seq_22844
	(at4g38970 : 81.6) Protein is tyrosine-phosphorylated and its phosphorylation state is modulated in response to ABA in Arabidopsis thaliana seeds.; fructose-bisphosphate aldolase 2 (FBA2); FUNCTIONS IN: fructose-bisphosphate aldolase activity, catalytic activity; INVOLVED IN: response to cadmium ion, pentose-phosphate shunt, response to abscisic acid stimulus; LOCATED IN: in 6 components; EXPRESS…
Bin: 1.3.6	PS.calvin cycle.aldolase
	Id: seq_23268
	(at4g26530 : 186.0) Aldolase superfamily protein; FUNCTIONS IN: fructose-bisphosphate aldolase activity; INVOLVED IN: glycolysis, metabolic process; EXPRESSED IN: 17 plant structures; EXPRESSED DURING: 11 growth stages; CONTAINS InterPro DOMAIN/s: Aldolase-type TIM barrel (InterPro:IPR013785), Fructose-bisphosphate aldolase, class-I (InterPro:IPR000741); BEST Arabidopsis thaliana protein match is…
Bin: 1.3.6	PS.calvin cycle.aldolase
	Id: seq_23720
	(p46256|alf1_pea : 135.0) Fructose-bisphosphate aldolase, cytoplasmic isozyme 1 (EC 4.1.2.13) - Pisum sativum (Garden pea) & (at4g26530 : 119.0) Aldolase superfamily protein; FUNCTIONS IN: fructose-bisphosphate aldolase activity; INVOLVED IN: glycolysis, metabolic process; EXPRESSED IN: 17 plant structures; EXPRESSED DURING: 11 growth stages; CONTAINS InterPro DOMAIN/s: Aldolase-type TIM barrel (…
Bin: 1.3.6	PS.calvin cycle.aldolase
	Id: seq_26095
	(at2g01140 : 228.0) Aldolase superfamily protein; FUNCTIONS IN: fructose-bisphosphate aldolase activity; INVOLVED IN: response to oxidative stress, response to cadmium ion, pentose-phosphate shunt; LOCATED IN: mitochondrion, chloroplast, plastoglobule; EXPRESSED IN: 25 plant structures; EXPRESSED DURING: 15 growth stages; CONTAINS InterPro DOMAIN/s: Aldolase-type TIM barrel (InterPro:IPR013785), …
Bin: 1.3.6	PS.calvin cycle.aldolase
	Id: seq_31024
	(at4g26530 : 85.9) Aldolase superfamily protein; FUNCTIONS IN: fructose-bisphosphate aldolase activity; INVOLVED IN: glycolysis, metabolic process; EXPRESSED IN: 17 plant structures; EXPRESSED DURING: 11 growth stages; CONTAINS InterPro DOMAIN/s: Aldolase-type TIM barrel (InterPro:IPR013785), Fructose-bisphosphate aldolase, class-I (InterPro:IPR000741); BEST Arabidopsis thaliana protein match is:…
Bin: 1.3.6	PS.calvin cycle.aldolase
	Id: seq_103767
	(at2g01140 : 154.0) Aldolase superfamily protein; FUNCTIONS IN: fructose-bisphosphate aldolase activity; INVOLVED IN: response to oxidative stress, response to cadmium ion, pentose-phosphate shunt; LOCATED IN: mitochondrion, chloroplast, plastoglobule; EXPRESSED IN: 25 plant structures; EXPRESSED DURING: 15 growth stages; CONTAINS InterPro DOMAIN/s: Aldolase-type TIM barrel (InterPro:IPR013785), …
Bin: 1.3.6	PS.calvin cycle.aldolase
	Id: seq_116895
	(at4g38970 : 144.0) Protein is tyrosine-phosphorylated and its phosphorylation state is modulated in response to ABA in Arabidopsis thaliana seeds.; fructose-bisphosphate aldolase 2 (FBA2); FUNCTIONS IN: fructose-bisphosphate aldolase activity, catalytic activity; INVOLVED IN: response to cadmium ion, pentose-phosphate shunt, response to abscisic acid stimulus; LOCATED IN: in 6 components; EXPRES…
Bin: 1.3.5	PS.calvin cycle.TPI
	Id: seq_1209
	(at2g21170 : 501.0) Encodes a plastidic triose phosphate isomerase. Mutants with reduced pdTPI levels have difficulty transitioning from heterotrophic to autotrophic growth. The related phenotypes, such as chlorosis in light-grown seedlings may result from an accumulation of dihydroxyacetone phosphate (DHAP) and methylglyoxal (MG) in these mutants. Both splice variants appear to be expressed, but…
Bin: 1.3.5	PS.calvin cycle.TPI
	Id: seq_6446
	(at2g21170 : 432.0) Encodes a plastidic triose phosphate isomerase. Mutants with reduced pdTPI levels have difficulty transitioning from heterotrophic to autotrophic growth. The related phenotypes, such as chlorosis in light-grown seedlings may result from an accumulation of dihydroxyacetone phosphate (DHAP) and methylglyoxal (MG) in these mutants. Both splice variants appear to be expressed, but…
Bin: 1.3.4	PS.calvin cycle.GAP
	Id: seq_480
	(p12858|g3pa_pea : 596.0) Glyceraldehyde-3-phosphate dehydrogenase A, chloroplast precursor (EC 1.2.1.13) (NADP-dependent glyceraldehydephosphate dehydrogenase subunit A) - Pisum sativum (Garden pea) & (at1g12900 : 594.0) glyceraldehyde 3-phosphate dehydrogenase A subunit 2 (GAPA-2); FUNCTIONS IN: NAD or NADH binding, glyceraldehyde-3-phosphate dehydrogenase activity; INVOLVED IN: oxidation reduc…
Bin: 1.3.4	PS.calvin cycle.GAP
	Id: seq_5586
	(p12858|g3pa_pea : 607.0) Glyceraldehyde-3-phosphate dehydrogenase A, chloroplast precursor (EC 1.2.1.13) (NADP-dependent glyceraldehydephosphate dehydrogenase subunit A) - Pisum sativum (Garden pea) & (at1g12900 : 597.0) glyceraldehyde 3-phosphate dehydrogenase A subunit 2 (GAPA-2); FUNCTIONS IN: NAD or NADH binding, glyceraldehyde-3-phosphate dehydrogenase activity; INVOLVED IN: oxidation reduc…
Bin: 1.3.4	PS.calvin cycle.GAP
	Id: seq_19688
	(p09044|g3pb_tobac : 261.0) Glyceraldehyde-3-phosphate dehydrogenase B, chloroplast precursor (EC 1.2.1.13) (NADP-dependent glyceraldehydephosphate dehydrogenase subunit B) (Fragment) - Nicotiana tabacum (Common tobacco) & (at1g42970 : 254.0) Encodes chloroplast localized glyceraldehyde-3-phosphate dehydrogenase that can use both NADH and NADPH to reduce 1,3-diphosphate glycerate. It forms A2B2 h…
Bin: 1.3.4	PS.calvin cycle.GAP
	Id: seq_20185
	(at1g42970 : 129.0) Encodes chloroplast localized glyceraldehyde-3-phosphate dehydrogenase that can use both NADH and NADPH to reduce 1,3-diphosphate glycerate. It forms A2B2 heterotetramers with GapA forms of the GADPH enzyme. These complexes are active in the light under reducing conditions, but show reduced NADPH-dependent activity in response to oxidized thioredoxins and increased NAD(H)/NADP…
Bin: 1.3.4	PS.calvin cycle.GAP
	Id: seq_20199
	(p12858|g3pa_pea : 107.0) Glyceraldehyde-3-phosphate dehydrogenase A, chloroplast precursor (EC 1.2.1.13) (NADP-dependent glyceraldehydephosphate dehydrogenase subunit A) - Pisum sativum (Garden pea) & (at1g12900 : 102.0) glyceraldehyde 3-phosphate dehydrogenase A subunit 2 (GAPA-2); FUNCTIONS IN: NAD or NADH binding, glyceraldehyde-3-phosphate dehydrogenase activity; INVOLVED IN: oxidation reduc…
Bin: 1.3.4	PS.calvin cycle.GAP
	Id: seq_21485
	(at1g42970 : 147.0) Encodes chloroplast localized glyceraldehyde-3-phosphate dehydrogenase that can use both NADH and NADPH to reduce 1,3-diphosphate glycerate. It forms A2B2 heterotetramers with GapA forms of the GADPH enzyme. These complexes are active in the light under reducing conditions, but show reduced NADPH-dependent activity in response to oxidized thioredoxins and increased NAD(H)/NADP…
Bin: 1.3.4	PS.calvin cycle.GAP
	Id: seq_22502
	(p09044|g3pb_tobac : 95.1) Glyceraldehyde-3-phosphate dehydrogenase B, chloroplast precursor (EC 1.2.1.13) (NADP-dependent glyceraldehydephosphate dehydrogenase subunit B) (Fragment) - Nicotiana tabacum (Common tobacco) & (at1g42970 : 93.6) Encodes chloroplast localized glyceraldehyde-3-phosphate dehydrogenase that can use both NADH and NADPH to reduce 1,3-diphosphate glycerate. It forms A2B2 het…
Bin: 1.3.4	PS.calvin cycle.GAP
	Id: seq_22657
	(at3g26650 : 128.0) Encodes one of the two subunits forming the photosynthetic glyceraldehyde-3-phosphate dehydrogenase (GAPDH) and as such a constituent of the supramolecular complex with phosphoribulokinase (PRK) thought to be linked by a small peptide encoded by CP12-2. GapA-1 is coordinately expressed by light with PRK and CP12-2. The enzyme activity, tested in leaf protein extracts dropped s…
Bin: 1.3.4	PS.calvin cycle.GAP
	Id: seq_23480
	(p09315|g3pa_maize : 149.0) Glyceraldehyde-3-phosphate dehydrogenase A, chloroplast precursor (EC 1.2.1.13) (NADP-dependent glyceraldehydephosphate dehydrogenase subunit A) - Zea mays (Maize) & (at3g26650 : 147.0) Encodes one of the two subunits forming the photosynthetic glyceraldehyde-3-phosphate dehydrogenase (GAPDH) and as such a constituent of the supramolecular complex with phosphoribulokin…
Bin: 1.3.4	PS.calvin cycle.GAP
	Id: seq_28985
	(p12859|g3pb_pea : 121.0) Glyceraldehyde-3-phosphate dehydrogenase B, chloroplast precursor (EC 1.2.1.13) (NADP-dependent glyceraldehydephosphate dehydrogenase subunit B) - Pisum sativum (Garden pea) & (at1g42970 : 97.8) Encodes chloroplast localized glyceraldehyde-3-phosphate dehydrogenase that can use both NADH and NADPH to reduce 1,3-diphosphate glycerate. It forms A2B2 heterotetramers with Ga…
Bin: 1.3.4	PS.calvin cycle.GAP
	Id: seq_90236
	(at1g12900 : 134.0) glyceraldehyde 3-phosphate dehydrogenase A subunit 2 (GAPA-2); FUNCTIONS IN: NAD or NADH binding, glyceraldehyde-3-phosphate dehydrogenase activity; INVOLVED IN: oxidation reduction, glycolysis, glucose metabolic process; EXPRESSED IN: 22 plant structures; EXPRESSED DURING: 13 growth stages; CONTAINS InterPro DOMAIN/s: Glyceraldehyde 3-phosphate dehydrogenase subfamily (InterP…
Bin: 1.3.3	PS.calvin cycle.phosphoglycerate kinase
	Id: seq_1870
	(q42962|pgky_tobac : 686.0) Phosphoglycerate kinase, cytosolic (EC 2.7.2.3) - Nicotiana tabacum (Common tobacco) & (at1g79550 : 673.0) Encodes cytosolic phosphoglycerate kinase (PGK).; phosphoglycerate kinase (PGK); FUNCTIONS IN: phosphoglycerate kinase activity; INVOLVED IN: glycolysis; LOCATED IN: cytosol, apoplast, plasma membrane, nucleus, membrane; EXPRESSED IN: 26 plant structures; EXPRESSE…
Bin: 1.3.3	PS.calvin cycle.phosphoglycerate kinase
	Id: seq_2365
	(q42962|pgky_tobac : 142.0) Phosphoglycerate kinase, cytosolic (EC 2.7.2.3) - Nicotiana tabacum (Common tobacco) & (at1g79550 : 137.0) Encodes cytosolic phosphoglycerate kinase (PGK).; phosphoglycerate kinase (PGK); FUNCTIONS IN: phosphoglycerate kinase activity; INVOLVED IN: glycolysis; LOCATED IN: cytosol, apoplast, plasma membrane, nucleus, membrane; EXPRESSED IN: 26 plant structures; EXPRESSE…
Bin: 1.3.3	PS.calvin cycle.phosphoglycerate kinase
	Id: seq_2939
	(at1g56190 : 725.0) Phosphoglycerate kinase family protein; FUNCTIONS IN: phosphoglycerate kinase activity; INVOLVED IN: glycolysis; LOCATED IN: thylakoid, mitochondrion, chloroplast, membrane; EXPRESSED IN: 25 plant structures; EXPRESSED DURING: 14 growth stages; CONTAINS InterPro DOMAIN/s: Phosphoglycerate kinase, N-terminal (InterPro:IPR015824), Phosphoglycerate kinase (InterPro:IPR001576), Ph…
Bin: 1.3.3	PS.calvin cycle.phosphoglycerate kinase
	Id: seq_7413
	(q42962|pgky_tobac : 690.0) Phosphoglycerate kinase, cytosolic (EC 2.7.2.3) - Nicotiana tabacum (Common tobacco) & (at1g79550 : 684.0) Encodes cytosolic phosphoglycerate kinase (PGK).; phosphoglycerate kinase (PGK); FUNCTIONS IN: phosphoglycerate kinase activity; INVOLVED IN: glycolysis; LOCATED IN: cytosol, apoplast, plasma membrane, nucleus, membrane; EXPRESSED IN: 26 plant structures; EXPRESSE…
Bin: 1.3.3	PS.calvin cycle.phosphoglycerate kinase
	Id: seq_13717
	(q42962|pgky_tobac : 248.0) Phosphoglycerate kinase, cytosolic (EC 2.7.2.3) - Nicotiana tabacum (Common tobacco) & (at3g12780 : 242.0) nuclear phosphoglycerate kinase (PGK1); phosphoglycerate kinase 1 (PGK1); FUNCTIONS IN: phosphoglycerate kinase activity; INVOLVED IN: response to cadmium ion, response to cold, glycolysis, peptidyl-cysteine S-nitrosylation; LOCATED IN: in 11 components; EXPRESSED…
Bin: 1.3.3	PS.calvin cycle.phosphoglycerate kinase
	Id: seq_29095
	(at3g12780 : 101.0) nuclear phosphoglycerate kinase (PGK1); phosphoglycerate kinase 1 (PGK1); FUNCTIONS IN: phosphoglycerate kinase activity; INVOLVED IN: response to cadmium ion, response to cold, glycolysis, peptidyl-cysteine S-nitrosylation; LOCATED IN: in 11 components; EXPRESSED IN: 26 plant structures; EXPRESSED DURING: 15 growth stages; CONTAINS InterPro DOMAIN/s: Phosphoglycerate kinase, …
Bin: 1.3.3	PS.calvin cycle.phosphoglycerate kinase
	Id: seq_40800
	(at1g79550 : 202.0) Encodes cytosolic phosphoglycerate kinase (PGK).; phosphoglycerate kinase (PGK); FUNCTIONS IN: phosphoglycerate kinase activity; INVOLVED IN: glycolysis; LOCATED IN: cytosol, apoplast, plasma membrane, nucleus, membrane; EXPRESSED IN: 26 plant structures; EXPRESSED DURING: 15 growth stages; CONTAINS InterPro DOMAIN/s: Phosphoglycerate kinase, N-terminal (InterPro:IPR015824), P…
Bin: 1.3.3	PS.calvin cycle.phosphoglycerate kinase
	Id: seq_40874
	(q42962|pgky_tobac : 174.0) Phosphoglycerate kinase, cytosolic (EC 2.7.2.3) - Nicotiana tabacum (Common tobacco) & (at3g12780 : 169.0) nuclear phosphoglycerate kinase (PGK1); phosphoglycerate kinase 1 (PGK1); FUNCTIONS IN: phosphoglycerate kinase activity; INVOLVED IN: response to cadmium ion, response to cold, glycolysis, peptidyl-cysteine S-nitrosylation; LOCATED IN: in 11 components; EXPRESSED…
Bin: 1.3.3	PS.calvin cycle.phosphoglycerate kinase
	Id: seq_43330
	(q42962|pgky_tobac : 127.0) Phosphoglycerate kinase, cytosolic (EC 2.7.2.3) - Nicotiana tabacum (Common tobacco) & (at1g79550 : 119.0) Encodes cytosolic phosphoglycerate kinase (PGK).; phosphoglycerate kinase (PGK); FUNCTIONS IN: phosphoglycerate kinase activity; INVOLVED IN: glycolysis; LOCATED IN: cytosol, apoplast, plasma membrane, nucleus, membrane; EXPRESSED IN: 26 plant structures; EXPRESSE…
Bin: 1.3.3	PS.calvin cycle.phosphoglycerate kinase
	Id: seq_43905
	(q42962|pgky_tobac : 150.0) Phosphoglycerate kinase, cytosolic (EC 2.7.2.3) - Nicotiana tabacum (Common tobacco) & (at1g79550 : 145.0) Encodes cytosolic phosphoglycerate kinase (PGK).; phosphoglycerate kinase (PGK); FUNCTIONS IN: phosphoglycerate kinase activity; INVOLVED IN: glycolysis; LOCATED IN: cytosol, apoplast, plasma membrane, nucleus, membrane; EXPRESSED IN: 26 plant structures; EXPRESSE…
Bin: 1.3.3	PS.calvin cycle.phosphoglycerate kinase
	Id: seq_50951
	(p12783|pgky_wheat : 123.0) Phosphoglycerate kinase, cytosolic (EC 2.7.2.3) - Triticum aestivum (Wheat) & (at3g12780 : 122.0) nuclear phosphoglycerate kinase (PGK1); phosphoglycerate kinase 1 (PGK1); FUNCTIONS IN: phosphoglycerate kinase activity; INVOLVED IN: response to cadmium ion, response to cold, glycolysis, peptidyl-cysteine S-nitrosylation; LOCATED IN: in 11 components; EXPRESSED IN: 26 p…
Bin: 1.3.3	PS.calvin cycle.phosphoglycerate kinase
	Id: seq_51990
	(at1g79550 : 172.0) Encodes cytosolic phosphoglycerate kinase (PGK).; phosphoglycerate kinase (PGK); FUNCTIONS IN: phosphoglycerate kinase activity; INVOLVED IN: glycolysis; LOCATED IN: cytosol, apoplast, plasma membrane, nucleus, membrane; EXPRESSED IN: 26 plant structures; EXPRESSED DURING: 15 growth stages; CONTAINS InterPro DOMAIN/s: Phosphoglycerate kinase, N-terminal (InterPro:IPR015824), P…
Bin: 1.3.3	PS.calvin cycle.phosphoglycerate kinase
	Id: seq_85388
	(at1g79550 : 142.0) Encodes cytosolic phosphoglycerate kinase (PGK).; phosphoglycerate kinase (PGK); FUNCTIONS IN: phosphoglycerate kinase activity; INVOLVED IN: glycolysis; LOCATED IN: cytosol, apoplast, plasma membrane, nucleus, membrane; EXPRESSED IN: 26 plant structures; EXPRESSED DURING: 15 growth stages; CONTAINS InterPro DOMAIN/s: Phosphoglycerate kinase, N-terminal (InterPro:IPR015824), P…
Bin: 1.3.2	PS.calvin cycle.rubisco small subunit
	Id: seq_24
	(q96542|rbs_betve : 149.0) Ribulose bisphosphate carboxylase small chain, chloroplast precursor (EC 4.1.1.39) (RuBisCO small subunit) - Betula verrucosa (White birch) (Betula pendula) & (at1g67090 : 139.0) ribulose bisphosphate carboxylase small chain 1A (RBCS1A); FUNCTIONS IN: ribulose-bisphosphate carboxylase activity, copper ion binding; INVOLVED IN: carbon fixation, response to cold, response…
Bin: 1.3.2	PS.calvin cycle.rubisco small subunit
	Id: seq_108
	(q96542|rbs_betve : 184.0) Ribulose bisphosphate carboxylase small chain, chloroplast precursor (EC 4.1.1.39) (RuBisCO small subunit) - Betula verrucosa (White birch) (Betula pendula) & (at1g67090 : 175.0) ribulose bisphosphate carboxylase small chain 1A (RBCS1A); FUNCTIONS IN: ribulose-bisphosphate carboxylase activity, copper ion binding; INVOLVED IN: carbon fixation, response to cold, response…
Bin: 1.3.2	PS.calvin cycle.rubisco small subunit
	Id: seq_3421
	(p08705|rbs_helan : 132.0) Ribulose bisphosphate carboxylase small chain, chloroplast precursor (EC 4.1.1.39) (RuBisCO small subunit) - Helianthus annuus (Common sunflower) & (at1g67090 : 123.0) ribulose bisphosphate carboxylase small chain 1A (RBCS1A); FUNCTIONS IN: ribulose-bisphosphate carboxylase activity, copper ion binding; INVOLVED IN: carbon fixation, response to cold, response to blue li…
Bin: 1.3.2	PS.calvin cycle.rubisco small subunit
	Id: seq_6756
	(q96542|rbs_betve : 130.0) Ribulose bisphosphate carboxylase small chain, chloroplast precursor (EC 4.1.1.39) (RuBisCO small subunit) - Betula verrucosa (White birch) (Betula pendula) & (at1g67090 : 125.0) ribulose bisphosphate carboxylase small chain 1A (RBCS1A); FUNCTIONS IN: ribulose-bisphosphate carboxylase activity, copper ion binding; INVOLVED IN: carbon fixation, response to cold, response…
Bin: 1.3.2	PS.calvin cycle.rubisco small subunit
	Id: seq_7831
	(p10053|rbs_pinth : 207.0) Ribulose bisphosphate carboxylase small chain, chloroplast precursor (EC 4.1.1.39) (RuBisCO small subunit) - Pinus thunbergii (Green pine) (Japanese black pine) & (at5g38410 : 199.0) Ribulose bisphosphate carboxylase (small chain) family protein; FUNCTIONS IN: ribulose-bisphosphate carboxylase activity; INVOLVED IN: carbon fixation, response to blue light, response to r…
Bin: 1.3.2	PS.calvin cycle.rubisco small subunit
	Id: seq_15724
	(p00871|rbs1_wheat : 122.0) Ribulose bisphosphate carboxylase small chain PWS4.3, chloroplast precursor (EC 4.1.1.39) (RuBisCO small subunit PWS4.3) - Triticum aestivum (Wheat) & (at5g38410 : 114.0) Ribulose bisphosphate carboxylase (small chain) family protein; FUNCTIONS IN: ribulose-bisphosphate carboxylase activity; INVOLVED IN: carbon fixation, response to blue light, response to red light, r…
Bin: 1.3.2	PS.calvin cycle.rubisco small subunit
	Id: seq_83504
	(q96542|rbs_betve : 182.0) Ribulose bisphosphate carboxylase small chain, chloroplast precursor (EC 4.1.1.39) (RuBisCO small subunit) - Betula verrucosa (White birch) (Betula pendula) & (at1g67090 : 175.0) ribulose bisphosphate carboxylase small chain 1A (RBCS1A); FUNCTIONS IN: ribulose-bisphosphate carboxylase activity, copper ion binding; INVOLVED IN: carbon fixation, response to cold, response…
Bin: 1.3.1	PS.calvin cycle.rubisco large subunit
	Id: seq_44181
	(p48715|rbl_sinal : 930.0) Ribulose bisphosphate carboxylase large chain precursor (EC 4.1.1.39) (RuBisCO large subunit) (Fragment) - Sinapis alba (White mustard) (Brassica hirta) & (atcg00490 : 901.0) large subunit of RUBISCO. Protein is tyrosine-phosphorylated and its phosphorylation state is modulated in response to ABA in Arabidopsis thaliana seeds.; RBCL; FUNCTIONS IN: ribulose-bisphosphate …
Bin: 1.3	PS.calvin cycle
	Id: seq_1294
	(at2g47400 : 144.0) CP12-1 encodes a small peptide found in the chloroplast stroma. It belongs to the CP12 gene family thought to be involved in the formation of a supramolecular complex with glyceraldehyde-3-phosphate dehydrogenase (GAPDH) and phosphoribulokinase (PRK) embedded in the Calvin cycle.; CP12 domain-containing protein 1 (CP12-1); FUNCTIONS IN: molecular_function unknown; INVOLVED IN:…
Bin: 1.2.7	PS.photorespiration.glycerate kinase
	Id: seq_493
	(at1g80380 : 594.0) encodes a glycerate kinase which catalyzes the last step of photorespiration C2 cycle.; P-loop containing nucleoside triphosphate hydrolases superfamily protein; FUNCTIONS IN: glycerate kinase activity; INVOLVED IN: photorespiration; LOCATED IN: chloroplast; EXPRESSED IN: 22 plant structures; EXPRESSED DURING: 13 growth stages. & (reliability: 1188.0) & (original description: …
Bin: 1.2.7	PS.photorespiration.glycerate kinase
	Id: seq_31393
	(at1g80380 : 174.0) encodes a glycerate kinase which catalyzes the last step of photorespiration C2 cycle.; P-loop containing nucleoside triphosphate hydrolases superfamily protein; FUNCTIONS IN: glycerate kinase activity; INVOLVED IN: photorespiration; LOCATED IN: chloroplast; EXPRESSED IN: 22 plant structures; EXPRESSED DURING: 13 growth stages. & (reliability: 348.0) & (original description: n…
Bin: 1.2.7	PS.photorespiration.glycerate kinase
	Id: seq_64260
	(at1g80380 : 159.0) encodes a glycerate kinase which catalyzes the last step of photorespiration C2 cycle.; P-loop containing nucleoside triphosphate hydrolases superfamily protein; FUNCTIONS IN: glycerate kinase activity; INVOLVED IN: photorespiration; LOCATED IN: chloroplast; EXPRESSED IN: 22 plant structures; EXPRESSED DURING: 13 growth stages. & (reliability: 318.0) & (original description: n…
Bin: 1.2.6	PS.photorespiration.hydroxypyruvate reductase
	Id: seq_2200
	(at1g79870 : 469.0) D-isomer specific 2-hydroxyacid dehydrogenase family protein; FUNCTIONS IN: in 6 functions; INVOLVED IN: metabolic process; EXPRESSED IN: 22 plant structures; EXPRESSED DURING: 13 growth stages; CONTAINS InterPro DOMAIN/s: D-isomer specific 2-hydroxyacid dehydrogenase, catalytic domain (InterPro:IPR006139), D-isomer specific 2-hydroxyacid dehydrogenase, NAD-binding (InterPro:I…
Bin: 1.2.6	PS.photorespiration.hydroxypyruvate reductase
	Id: seq_3222
	(at1g79870 : 457.0) D-isomer specific 2-hydroxyacid dehydrogenase family protein; FUNCTIONS IN: in 6 functions; INVOLVED IN: metabolic process; EXPRESSED IN: 22 plant structures; EXPRESSED DURING: 13 growth stages; CONTAINS InterPro DOMAIN/s: D-isomer specific 2-hydroxyacid dehydrogenase, catalytic domain (InterPro:IPR006139), D-isomer specific 2-hydroxyacid dehydrogenase, NAD-binding (InterPro:I…
Bin: 1.2.6	PS.photorespiration.hydroxypyruvate reductase
	Id: seq_6776
	(p13443|dhgy_cucsa : 645.0) Glycerate dehydrogenase (EC 1.1.1.29) (NADH-dependent hydroxypyruvate reductase) (HPR) (GDH) - Cucumis sativus (Cucumber) & (at1g68010 : 622.0) Encodes hydroxypyruvate reductase.; hydroxypyruvate reductase (HPR); CONTAINS InterPro DOMAIN/s: D-isomer specific 2-hydroxyacid dehydrogenase, catalytic domain (InterPro:IPR006139), D-isomer specific 2-hydroxyacid dehydrogenas…
Bin: 1.2.6	PS.photorespiration.hydroxypyruvate reductase
	Id: seq_7854
	(at1g12550 : 335.0) D-isomer specific 2-hydroxyacid dehydrogenase family protein; FUNCTIONS IN: in 6 functions; INVOLVED IN: metabolic process; LOCATED IN: cellular_component unknown; EXPRESSED IN: 24 plant structures; EXPRESSED DURING: 13 growth stages; CONTAINS InterPro DOMAIN/s: D-isomer specific 2-hydroxyacid dehydrogenase, catalytic domain (InterPro:IPR006139), D-isomer specific 2-hydroxyaci…
Bin: 1.2.6	PS.photorespiration.hydroxypyruvate reductase
	Id: seq_9608
	(at1g68010 : 436.0) Encodes hydroxypyruvate reductase.; hydroxypyruvate reductase (HPR); CONTAINS InterPro DOMAIN/s: D-isomer specific 2-hydroxyacid dehydrogenase, catalytic domain (InterPro:IPR006139), D-isomer specific 2-hydroxyacid dehydrogenase, NAD-binding (InterPro:IPR006140), NAD(P)-binding domain (InterPro:IPR016040); BEST Arabidopsis thaliana protein match is: D-3-phosphoglycerate dehydr…
Bin: 1.2.6	PS.photorespiration.hydroxypyruvate reductase
	Id: seq_10400
	(at1g79870 : 85.9) D-isomer specific 2-hydroxyacid dehydrogenase family protein; FUNCTIONS IN: in 6 functions; INVOLVED IN: metabolic process; EXPRESSED IN: 22 plant structures; EXPRESSED DURING: 13 growth stages; CONTAINS InterPro DOMAIN/s: D-isomer specific 2-hydroxyacid dehydrogenase, catalytic domain (InterPro:IPR006139), D-isomer specific 2-hydroxyacid dehydrogenase, NAD-binding (InterPro:IP…
Bin: 1.2.6	PS.photorespiration.hydroxypyruvate reductase
	Id: seq_13532
	(at1g79870 : 485.0) D-isomer specific 2-hydroxyacid dehydrogenase family protein; FUNCTIONS IN: in 6 functions; INVOLVED IN: metabolic process; EXPRESSED IN: 22 plant structures; EXPRESSED DURING: 13 growth stages; CONTAINS InterPro DOMAIN/s: D-isomer specific 2-hydroxyacid dehydrogenase, catalytic domain (InterPro:IPR006139), D-isomer specific 2-hydroxyacid dehydrogenase, NAD-binding (InterPro:I…
Bin: 1.2.6	PS.photorespiration.hydroxypyruvate reductase
	Id: seq_15585
	(at1g79870 : 439.0) D-isomer specific 2-hydroxyacid dehydrogenase family protein; FUNCTIONS IN: in 6 functions; INVOLVED IN: metabolic process; EXPRESSED IN: 22 plant structures; EXPRESSED DURING: 13 growth stages; CONTAINS InterPro DOMAIN/s: D-isomer specific 2-hydroxyacid dehydrogenase, catalytic domain (InterPro:IPR006139), D-isomer specific 2-hydroxyacid dehydrogenase, NAD-binding (InterPro:I…
Bin: 1.2.6	PS.photorespiration.hydroxypyruvate reductase
	Id: seq_16916
	(at2g45630 : 370.0) D-isomer specific 2-hydroxyacid dehydrogenase family protein; FUNCTIONS IN: NAD or NADH binding, oxidoreductase activity, acting on the CH-OH group of donors, NAD or NADP as acceptor, binding, catalytic activity, cofactor binding; INVOLVED IN: metabolic process; EXPRESSED IN: stem; CONTAINS InterPro DOMAIN/s: D-isomer specific 2-hydroxyacid dehydrogenase, catalytic domain (Int…
Bin: 1.2.6	PS.photorespiration.hydroxypyruvate reductase
	Id: seq_20229
	(at1g79870 : 211.0) D-isomer specific 2-hydroxyacid dehydrogenase family protein; FUNCTIONS IN: in 6 functions; INVOLVED IN: metabolic process; EXPRESSED IN: 22 plant structures; EXPRESSED DURING: 13 growth stages; CONTAINS InterPro DOMAIN/s: D-isomer specific 2-hydroxyacid dehydrogenase, catalytic domain (InterPro:IPR006139), D-isomer specific 2-hydroxyacid dehydrogenase, NAD-binding (InterPro:I…
Bin: 1.2.6	PS.photorespiration.hydroxypyruvate reductase
	Id: seq_21357
	(at1g79870 : 461.0) D-isomer specific 2-hydroxyacid dehydrogenase family protein; FUNCTIONS IN: in 6 functions; INVOLVED IN: metabolic process; EXPRESSED IN: 22 plant structures; EXPRESSED DURING: 13 growth stages; CONTAINS InterPro DOMAIN/s: D-isomer specific 2-hydroxyacid dehydrogenase, catalytic domain (InterPro:IPR006139), D-isomer specific 2-hydroxyacid dehydrogenase, NAD-binding (InterPro:I…
Bin: 1.2.6	PS.photorespiration.hydroxypyruvate reductase
	Id: seq_22980
	(at2g45630 : 385.0) D-isomer specific 2-hydroxyacid dehydrogenase family protein; FUNCTIONS IN: NAD or NADH binding, oxidoreductase activity, acting on the CH-OH group of donors, NAD or NADP as acceptor, binding, catalytic activity, cofactor binding; INVOLVED IN: metabolic process; EXPRESSED IN: stem; CONTAINS InterPro DOMAIN/s: D-isomer specific 2-hydroxyacid dehydrogenase, catalytic domain (Int…
Bin: 1.2.6	PS.photorespiration.hydroxypyruvate reductase
	Id: seq_27292
	(at1g68010 : 101.0) Encodes hydroxypyruvate reductase.; hydroxypyruvate reductase (HPR); CONTAINS InterPro DOMAIN/s: D-isomer specific 2-hydroxyacid dehydrogenase, catalytic domain (InterPro:IPR006139), D-isomer specific 2-hydroxyacid dehydrogenase, NAD-binding (InterPro:IPR006140), NAD(P)-binding domain (InterPro:IPR016040); BEST Arabidopsis thaliana protein match is: D-3-phosphoglycerate dehydr…
Bin: 1.2.6	PS.photorespiration.hydroxypyruvate reductase
	Id: seq_29615
	(at1g79870 : 416.0) D-isomer specific 2-hydroxyacid dehydrogenase family protein; FUNCTIONS IN: in 6 functions; INVOLVED IN: metabolic process; EXPRESSED IN: 22 plant structures; EXPRESSED DURING: 13 growth stages; CONTAINS InterPro DOMAIN/s: D-isomer specific 2-hydroxyacid dehydrogenase, catalytic domain (InterPro:IPR006139), D-isomer specific 2-hydroxyacid dehydrogenase, NAD-binding (InterPro:I…
Bin: 1.2.6	PS.photorespiration.hydroxypyruvate reductase
	Id: seq_29734
	(at1g79870 : 185.0) D-isomer specific 2-hydroxyacid dehydrogenase family protein; FUNCTIONS IN: in 6 functions; INVOLVED IN: metabolic process; EXPRESSED IN: 22 plant structures; EXPRESSED DURING: 13 growth stages; CONTAINS InterPro DOMAIN/s: D-isomer specific 2-hydroxyacid dehydrogenase, catalytic domain (InterPro:IPR006139), D-isomer specific 2-hydroxyacid dehydrogenase, NAD-binding (InterPro:I…
Bin: 1.2.6	PS.photorespiration.hydroxypyruvate reductase
	Id: seq_36788
	(at2g45630 : 176.0) D-isomer specific 2-hydroxyacid dehydrogenase family protein; FUNCTIONS IN: NAD or NADH binding, oxidoreductase activity, acting on the CH-OH group of donors, NAD or NADP as acceptor, binding, catalytic activity, cofactor binding; INVOLVED IN: metabolic process; EXPRESSED IN: stem; CONTAINS InterPro DOMAIN/s: D-isomer specific 2-hydroxyacid dehydrogenase, catalytic domain (Int…
Bin: 1.2.6	PS.photorespiration.hydroxypyruvate reductase
	Id: seq_52997
	(at2g45630 : 135.0) D-isomer specific 2-hydroxyacid dehydrogenase family protein; FUNCTIONS IN: NAD or NADH binding, oxidoreductase activity, acting on the CH-OH group of donors, NAD or NADP as acceptor, binding, catalytic activity, cofactor binding; INVOLVED IN: metabolic process; EXPRESSED IN: stem; CONTAINS InterPro DOMAIN/s: D-isomer specific 2-hydroxyacid dehydrogenase, catalytic domain (Int…
Bin: 1.2.6	PS.photorespiration.hydroxypyruvate reductase
	Id: seq_56035
	(at1g12550 : 335.0) D-isomer specific 2-hydroxyacid dehydrogenase family protein; FUNCTIONS IN: in 6 functions; INVOLVED IN: metabolic process; LOCATED IN: cellular_component unknown; EXPRESSED IN: 24 plant structures; EXPRESSED DURING: 13 growth stages; CONTAINS InterPro DOMAIN/s: D-isomer specific 2-hydroxyacid dehydrogenase, catalytic domain (InterPro:IPR006139), D-isomer specific 2-hydroxyaci…
Bin: 1.2.6	PS.photorespiration.hydroxypyruvate reductase
	Id: seq_62602
	(at1g79870 : 103.0) D-isomer specific 2-hydroxyacid dehydrogenase family protein; FUNCTIONS IN: in 6 functions; INVOLVED IN: metabolic process; EXPRESSED IN: 22 plant structures; EXPRESSED DURING: 13 growth stages; CONTAINS InterPro DOMAIN/s: D-isomer specific 2-hydroxyacid dehydrogenase, catalytic domain (InterPro:IPR006139), D-isomer specific 2-hydroxyacid dehydrogenase, NAD-binding (InterPro:I…
Bin: 1.2.5	PS.photorespiration.serine hydroxymethyltransferase
	Id: seq_1804
	(at1g36370 : 786.0) Encodes a putative serine hydroxymethyltransferase.; serine hydroxymethyltransferase 7 (SHM7); FUNCTIONS IN: pyridoxal phosphate binding, glycine hydroxymethyltransferase activity, catalytic activity; INVOLVED IN: response to cadmium ion, glycine metabolic process, L-serine metabolic process; EXPRESSED IN: 23 plant structures; EXPRESSED DURING: 15 growth stages; CONTAINS Inter…
Bin: 1.2.5	PS.photorespiration.serine hydroxymethyltransferase
	Id: seq_3081
	(at4g32520 : 839.0) Encodes a serine hydroxymethyltransferase SHMT3 located in the plastid.; serine hydroxymethyltransferase 3 (SHM3); FUNCTIONS IN: glycine hydroxymethyltransferase activity; INVOLVED IN: glycine metabolic process, L-serine metabolic process; LOCATED IN: chloroplast, plastid; EXPRESSED IN: 24 plant structures; EXPRESSED DURING: 14 growth stages; CONTAINS InterPro DOMAIN/s: Pyrido…
Bin: 1.2.5	PS.photorespiration.serine hydroxymethyltransferase
	Id: seq_3884
	(at1g22020 : 285.0) Encodes a putative serine hydroxymethyltransferase.; serine hydroxymethyltransferase 6 (SHM6); FUNCTIONS IN: pyridoxal phosphate binding, glycine hydroxymethyltransferase activity, catalytic activity; INVOLVED IN: glycine metabolic process, L-serine metabolic process; LOCATED IN: cellular_component unknown; EXPRESSED IN: 23 plant structures; EXPRESSED DURING: 15 growth stages;…
Bin: 1.2.5	PS.photorespiration.serine hydroxymethyltransferase
	Id: seq_4407
	(p34899|glym_pea : 887.0) Serine hydroxymethyltransferase, mitochondrial precursor (EC 2.1.2.1) (Serine methylase) (Glycine hydroxymethyltransferase) (SHMT) - Pisum sativum (Garden pea) & (at5g26780 : 877.0) Encodes a protein with serine hydroxymethyltransferase activity which is thought to be localized in the mitochondrial matrix. SHM2 expression fails to rescue the conditional lethal phenotype …
Bin: 1.2.5	PS.photorespiration.serine hydroxymethyltransferase
	Id: seq_16609
	(at4g32520 : 204.0) Encodes a serine hydroxymethyltransferase SHMT3 located in the plastid.; serine hydroxymethyltransferase 3 (SHM3); FUNCTIONS IN: glycine hydroxymethyltransferase activity; INVOLVED IN: glycine metabolic process, L-serine metabolic process; LOCATED IN: chloroplast, plastid; EXPRESSED IN: 24 plant structures; EXPRESSED DURING: 14 growth stages; CONTAINS InterPro DOMAIN/s: Pyrido…
Bin: 1.2.5	PS.photorespiration.serine hydroxymethyltransferase
	Id: seq_18066
	(at1g22020 : 263.0) Encodes a putative serine hydroxymethyltransferase.; serine hydroxymethyltransferase 6 (SHM6); FUNCTIONS IN: pyridoxal phosphate binding, glycine hydroxymethyltransferase activity, catalytic activity; INVOLVED IN: glycine metabolic process, L-serine metabolic process; LOCATED IN: cellular_component unknown; EXPRESSED IN: 23 plant structures; EXPRESSED DURING: 15 growth stages;…
Bin: 1.2.5	PS.photorespiration.serine hydroxymethyltransferase
	Id: seq_18810
	(p49358|glyn_flapr : 278.0) Serine hydroxymethyltransferase 2, mitochondrial precursor (EC 2.1.2.1) (Serine methylase) (Glycine hydroxymethyltransferase) (SHMT) - Flaveria pringlei & (at4g37930 : 273.0) Encodes a protein with mitochondrial serine hydroxymethyltransferase activity, which functions in the photorespiratory pathway, catalyzes the conversion of serine and tetrahydrofolate to glycine a…
Bin: 1.2.5	PS.photorespiration.serine hydroxymethyltransferase
	Id: seq_19152
	(at4g32520 : 162.0) Encodes a serine hydroxymethyltransferase SHMT3 located in the plastid.; serine hydroxymethyltransferase 3 (SHM3); FUNCTIONS IN: glycine hydroxymethyltransferase activity; INVOLVED IN: glycine metabolic process, L-serine metabolic process; LOCATED IN: chloroplast, plastid; EXPRESSED IN: 24 plant structures; EXPRESSED DURING: 14 growth stages; CONTAINS InterPro DOMAIN/s: Pyrido…
Bin: 1.2.5	PS.photorespiration.serine hydroxymethyltransferase
	Id: seq_28709
	(at4g32520 : 126.0) Encodes a serine hydroxymethyltransferase SHMT3 located in the plastid.; serine hydroxymethyltransferase 3 (SHM3); FUNCTIONS IN: glycine hydroxymethyltransferase activity; INVOLVED IN: glycine metabolic process, L-serine metabolic process; LOCATED IN: chloroplast, plastid; EXPRESSED IN: 24 plant structures; EXPRESSED DURING: 14 growth stages; CONTAINS InterPro DOMAIN/s: Pyrido…
Bin: 1.2.5	PS.photorespiration.serine hydroxymethyltransferase
	Id: seq_40640
	(p34899|glym_pea : 213.0) Serine hydroxymethyltransferase, mitochondrial precursor (EC 2.1.2.1) (Serine methylase) (Glycine hydroxymethyltransferase) (SHMT) - Pisum sativum (Garden pea) & (at4g37930 : 212.0) Encodes a protein with mitochondrial serine hydroxymethyltransferase activity, which functions in the photorespiratory pathway, catalyzes the conversion of serine and tetrahydrofolate to glyc…
Bin: 1.2.5	PS.photorespiration.serine hydroxymethyltransferase
	Id: seq_43519
	(at4g32520 : 189.0) Encodes a serine hydroxymethyltransferase SHMT3 located in the plastid.; serine hydroxymethyltransferase 3 (SHM3); FUNCTIONS IN: glycine hydroxymethyltransferase activity; INVOLVED IN: glycine metabolic process, L-serine metabolic process; LOCATED IN: chloroplast, plastid; EXPRESSED IN: 24 plant structures; EXPRESSED DURING: 14 growth stages; CONTAINS InterPro DOMAIN/s: Pyrido…
Bin: 1.2.4.4	PS.photorespiration.glycine cleavage.H protein
	Id: seq_1814
	(p16048|gcsh_pea : 284.0) Glycine cleavage system H protein, mitochondrial precursor - Pisum sativum (Garden pea) & (at1g32470 : 279.0) Single hybrid motif superfamily protein; FUNCTIONS IN: glycine dehydrogenase (decarboxylating) activity; INVOLVED IN: glycine catabolic process, glycine decarboxylation via glycine cleavage system; LOCATED IN: mitochondrion, glycine cleavage complex, chloroplast;…
Bin: 1.2.4.4	PS.photorespiration.glycine cleavage.H protein
	Id: seq_5658
	(at2g35120 : 228.0) Single hybrid motif superfamily protein; FUNCTIONS IN: glycine dehydrogenase (decarboxylating) activity, ATP binding; INVOLVED IN: glycine catabolic process, glycine decarboxylation via glycine cleavage system; LOCATED IN: mitochondrion, glycine cleavage complex; EXPRESSED IN: 22 plant structures; EXPRESSED DURING: 13 growth stages; CONTAINS InterPro DOMAIN/s: 2-oxo acid dehyd…
Bin: 1.2.4.4	PS.photorespiration.glycine cleavage.H protein
	Id: seq_10106
	(at2g35120 : 246.0) Single hybrid motif superfamily protein; FUNCTIONS IN: glycine dehydrogenase (decarboxylating) activity, ATP binding; INVOLVED IN: glycine catabolic process, glycine decarboxylation via glycine cleavage system; LOCATED IN: mitochondrion, glycine cleavage complex; EXPRESSED IN: 22 plant structures; EXPRESSED DURING: 13 growth stages; CONTAINS InterPro DOMAIN/s: 2-oxo acid dehyd…
Bin: 1.2.4.4	PS.photorespiration.glycine cleavage.H protein
	Id: seq_12409
	(p49359|gcsh_flapr : 87.8) Glycine cleavage system H protein, mitochondrial precursor - Flaveria pringlei & (at2g35370 : 87.4) Encodes glycine decarboxylase complex H protein. Involved in photorespiration.; glycine decarboxylase complex H (GDCH); FUNCTIONS IN: glycine dehydrogenase (decarboxylating) activity; INVOLVED IN: glycine decarboxylation via glycine cleavage system, photorespiration; LOCA…
Bin: 1.2.4.4	PS.photorespiration.glycine cleavage.H protein
	Id: seq_16958
	(at2g35120 : 225.0) Single hybrid motif superfamily protein; FUNCTIONS IN: glycine dehydrogenase (decarboxylating) activity, ATP binding; INVOLVED IN: glycine catabolic process, glycine decarboxylation via glycine cleavage system; LOCATED IN: mitochondrion, glycine cleavage complex; EXPRESSED IN: 22 plant structures; EXPRESSED DURING: 13 growth stages; CONTAINS InterPro DOMAIN/s: 2-oxo acid dehyd…
Bin: 1.2.4.4	PS.photorespiration.glycine cleavage.H protein
	Id: seq_16964
	(at2g35120 : 201.0) Single hybrid motif superfamily protein; FUNCTIONS IN: glycine dehydrogenase (decarboxylating) activity, ATP binding; INVOLVED IN: glycine catabolic process, glycine decarboxylation via glycine cleavage system; LOCATED IN: mitochondrion, glycine cleavage complex; EXPRESSED IN: 22 plant structures; EXPRESSED DURING: 13 growth stages; CONTAINS InterPro DOMAIN/s: 2-oxo acid dehyd…
Bin: 1.2.4.4	PS.photorespiration.glycine cleavage.H protein
	Id: seq_20987
	(at2g35120 : 177.0) Single hybrid motif superfamily protein; FUNCTIONS IN: glycine dehydrogenase (decarboxylating) activity, ATP binding; INVOLVED IN: glycine catabolic process, glycine decarboxylation via glycine cleavage system; LOCATED IN: mitochondrion, glycine cleavage complex; EXPRESSED IN: 22 plant structures; EXPRESSED DURING: 13 growth stages; CONTAINS InterPro DOMAIN/s: 2-oxo acid dehyd…
Bin: 1.2.4.4	PS.photorespiration.glycine cleavage.H protein
	Id: seq_24871
	(at2g35120 : 142.0) Single hybrid motif superfamily protein; FUNCTIONS IN: glycine dehydrogenase (decarboxylating) activity, ATP binding; INVOLVED IN: glycine catabolic process, glycine decarboxylation via glycine cleavage system; LOCATED IN: mitochondrion, glycine cleavage complex; EXPRESSED IN: 22 plant structures; EXPRESSED DURING: 13 growth stages; CONTAINS InterPro DOMAIN/s: 2-oxo acid dehyd…
Bin: 1.2.4.4	PS.photorespiration.glycine cleavage.H protein
	Id: seq_34607
	(at2g35120 : 103.0) Single hybrid motif superfamily protein; FUNCTIONS IN: glycine dehydrogenase (decarboxylating) activity, ATP binding; INVOLVED IN: glycine catabolic process, glycine decarboxylation via glycine cleavage system; LOCATED IN: mitochondrion, glycine cleavage complex; EXPRESSED IN: 22 plant structures; EXPRESSED DURING: 13 growth stages; CONTAINS InterPro DOMAIN/s: 2-oxo acid dehyd…
Bin: 1.2.4.4	PS.photorespiration.glycine cleavage.H protein
	Id: seq_38871
	(at2g35120 : 166.0) Single hybrid motif superfamily protein; FUNCTIONS IN: glycine dehydrogenase (decarboxylating) activity, ATP binding; INVOLVED IN: glycine catabolic process, glycine decarboxylation via glycine cleavage system; LOCATED IN: mitochondrion, glycine cleavage complex; EXPRESSED IN: 22 plant structures; EXPRESSED DURING: 13 growth stages; CONTAINS InterPro DOMAIN/s: 2-oxo acid dehyd…
Bin: 1.2.4.4	PS.photorespiration.glycine cleavage.H protein
	Id: seq_42458
	(at2g35120 : 90.9) Single hybrid motif superfamily protein; FUNCTIONS IN: glycine dehydrogenase (decarboxylating) activity, ATP binding; INVOLVED IN: glycine catabolic process, glycine decarboxylation via glycine cleavage system; LOCATED IN: mitochondrion, glycine cleavage complex; EXPRESSED IN: 22 plant structures; EXPRESSED DURING: 13 growth stages; CONTAINS InterPro DOMAIN/s: 2-oxo acid dehydr…
Bin: 1.2.4.4	PS.photorespiration.glycine cleavage.H protein
	Id: seq_68647
	(at2g35120 : 114.0) Single hybrid motif superfamily protein; FUNCTIONS IN: glycine dehydrogenase (decarboxylating) activity, ATP binding; INVOLVED IN: glycine catabolic process, glycine decarboxylation via glycine cleavage system; LOCATED IN: mitochondrion, glycine cleavage complex; EXPRESSED IN: 22 plant structures; EXPRESSED DURING: 13 growth stages; CONTAINS InterPro DOMAIN/s: 2-oxo acid dehyd…
Bin: 1.2.4.4	PS.photorespiration.glycine cleavage.H protein
	Id: seq_76388
	(at2g35120 : 138.0) Single hybrid motif superfamily protein; FUNCTIONS IN: glycine dehydrogenase (decarboxylating) activity, ATP binding; INVOLVED IN: glycine catabolic process, glycine decarboxylation via glycine cleavage system; LOCATED IN: mitochondrion, glycine cleavage complex; EXPRESSED IN: 22 plant structures; EXPRESSED DURING: 13 growth stages; CONTAINS InterPro DOMAIN/s: 2-oxo acid dehyd…
Bin: 1.2.4.2	PS.photorespiration.glycine cleavage.T subunit
	Id: seq_7871
	(p54260|gcst_soltu : 149.0) Aminomethyltransferase, mitochondrial precursor (EC 2.1.2.10) (Glycine cleavage system T protein) (GCVT) - Solanum tuberosum (Potato) & (at1g11860 : 148.0) Glycine cleavage T-protein family; FUNCTIONS IN: aminomethyltransferase activity; EXPRESSED IN: 23 plant structures; EXPRESSED DURING: 14 growth stages; CONTAINS InterPro DOMAIN/s: Glycine cleavage system T protein …
Bin: 1.2.4.2	PS.photorespiration.glycine cleavage.T subunit
	Id: seq_31153
	(p49363|gcst_flapr : 105.0) Aminomethyltransferase, mitochondrial precursor (EC 2.1.2.10) (Glycine cleavage system T protein) (GCVT) - Flaveria pringlei & (at1g11860 : 101.0) Glycine cleavage T-protein family; FUNCTIONS IN: aminomethyltransferase activity; EXPRESSED IN: 23 plant structures; EXPRESSED DURING: 14 growth stages; CONTAINS InterPro DOMAIN/s: Glycine cleavage system T protein (InterPro…
Bin: 1.2.4.2	PS.photorespiration.glycine cleavage.T subunit
	Id: seq_36470
	(p54260|gcst_soltu : 138.0) Aminomethyltransferase, mitochondrial precursor (EC 2.1.2.10) (Glycine cleavage system T protein) (GCVT) - Solanum tuberosum (Potato) & (at1g11860 : 124.0) Glycine cleavage T-protein family; FUNCTIONS IN: aminomethyltransferase activity; EXPRESSED IN: 23 plant structures; EXPRESSED DURING: 14 growth stages; CONTAINS InterPro DOMAIN/s: Glycine cleavage system T protein …
Bin: 1.2.4.2	PS.photorespiration.glycine cleavage.T subunit
	Id: seq_92479
	(p49363|gcst_flapr : 87.0) Aminomethyltransferase, mitochondrial precursor (EC 2.1.2.10) (Glycine cleavage system T protein) (GCVT) - Flaveria pringlei & (at1g11860 : 82.4) Glycine cleavage T-protein family; FUNCTIONS IN: aminomethyltransferase activity; EXPRESSED IN: 23 plant structures; EXPRESSED DURING: 14 growth stages; CONTAINS InterPro DOMAIN/s: Glycine cleavage system T protein (InterPro:I…
Bin: 1.2.4.1	PS.photorespiration.glycine cleavage.P subunit
	Id: seq_3788
	(o49954|gcsp_soltu : 1642.0) Glycine dehydrogenase [decarboxylating], mitochondrial precursor (EC 1.4.4.2) (Glycine decarboxylase) (Glycine cleavage system P-protein) - Solanum tuberosum (Potato) & (at4g33010 : 1612.0) glycine decarboxylase P-protein 1 (GLDP1); FUNCTIONS IN: glycine dehydrogenase (decarboxylating) activity, protein binding; INVOLVED IN: glycine catabolic process, response to cadm…
Bin: 1.2.4.1	PS.photorespiration.glycine cleavage.P subunit
	Id: seq_6062
	(o49954|gcsp_soltu : 1347.0) Glycine dehydrogenase [decarboxylating], mitochondrial precursor (EC 1.4.4.2) (Glycine decarboxylase) (Glycine cleavage system P-protein) - Solanum tuberosum (Potato) & (at4g33010 : 1336.0) glycine decarboxylase P-protein 1 (GLDP1); FUNCTIONS IN: glycine dehydrogenase (decarboxylating) activity, protein binding; INVOLVED IN: glycine catabolic process, response to cadm…
Bin: 1.2.4.1	PS.photorespiration.glycine cleavage.P subunit
	Id: seq_6743
	(at4g33010 : 189.0) glycine decarboxylase P-protein 1 (GLDP1); FUNCTIONS IN: glycine dehydrogenase (decarboxylating) activity, protein binding; INVOLVED IN: glycine catabolic process, response to cadmium ion, glycine decarboxylation via glycine cleavage system; LOCATED IN: mitochondrion, apoplast, glycine cleavage complex, chloroplast; EXPRESSED IN: 31 plant structures; EXPRESSED DURING: 15 growt…
Bin: 1.2.4.1	PS.photorespiration.glycine cleavage.P subunit
	Id: seq_9665
	(p26969|gcsp_pea : 138.0) Glycine dehydrogenase [decarboxylating], mitochondrial precursor (EC 1.4.4.2) (Glycine decarboxylase) (Glycine cleavage system P-protein) - Pisum sativum (Garden pea) & (at2g26080 : 137.0) glycine decarboxylase P-protein 2 (GLDP2); FUNCTIONS IN: glycine dehydrogenase (decarboxylating) activity, ATP binding; INVOLVED IN: oxidation reduction, glycine decarboxylation via gl…
Bin: 1.2.4.1	PS.photorespiration.glycine cleavage.P subunit
	Id: seq_24876
	(o49954|gcsp_soltu : 187.0) Glycine dehydrogenase [decarboxylating], mitochondrial precursor (EC 1.4.4.2) (Glycine decarboxylase) (Glycine cleavage system P-protein) - Solanum tuberosum (Potato) & (at2g26080 : 185.0) glycine decarboxylase P-protein 2 (GLDP2); FUNCTIONS IN: glycine dehydrogenase (decarboxylating) activity, ATP binding; INVOLVED IN: oxidation reduction, glycine decarboxylation via …
Bin: 1.2.4.1	PS.photorespiration.glycine cleavage.P subunit
	Id: seq_33041
	(p49362|gcspb_flapr : 134.0) Glycine dehydrogenase [decarboxylating] B, mitochondrial precursor (EC 1.4.4.2) (Glycine decarboxylase B) (Glycine cleavage system P-protein B) - Flaveria pringlei & (at2g26080 : 127.0) glycine decarboxylase P-protein 2 (GLDP2); FUNCTIONS IN: glycine dehydrogenase (decarboxylating) activity, ATP binding; INVOLVED IN: oxidation reduction, glycine decarboxylation via gl…
Bin: 1.2.4.1	PS.photorespiration.glycine cleavage.P subunit
	Id: seq_38482
	(p49362|gcspb_flapr : 140.0) Glycine dehydrogenase [decarboxylating] B, mitochondrial precursor (EC 1.4.4.2) (Glycine decarboxylase B) (Glycine cleavage system P-protein B) - Flaveria pringlei & (at4g33010 : 137.0) glycine decarboxylase P-protein 1 (GLDP1); FUNCTIONS IN: glycine dehydrogenase (decarboxylating) activity, protein binding; INVOLVED IN: glycine catabolic process, response to cadmium …
Bin: 1.2.4.1	PS.photorespiration.glycine cleavage.P subunit
	Id: seq_39218
	(p49362|gcspb_flapr : 376.0) Glycine dehydrogenase [decarboxylating] B, mitochondrial precursor (EC 1.4.4.2) (Glycine decarboxylase B) (Glycine cleavage system P-protein B) - Flaveria pringlei & (at2g26080 : 368.0) glycine decarboxylase P-protein 2 (GLDP2); FUNCTIONS IN: glycine dehydrogenase (decarboxylating) activity, ATP binding; INVOLVED IN: oxidation reduction, glycine decarboxylation via gl…
Bin: 1.2.4.1	PS.photorespiration.glycine cleavage.P subunit
	Id: seq_43940
	(p49362|gcspb_flapr : 164.0) Glycine dehydrogenase [decarboxylating] B, mitochondrial precursor (EC 1.4.4.2) (Glycine decarboxylase B) (Glycine cleavage system P-protein B) - Flaveria pringlei & (at4g33010 : 159.0) glycine decarboxylase P-protein 1 (GLDP1); FUNCTIONS IN: glycine dehydrogenase (decarboxylating) activity, protein binding; INVOLVED IN: glycine catabolic process, response to cadmium …
Bin: 1.2.4.1	PS.photorespiration.glycine cleavage.P subunit
	Id: seq_69030
	(p49362|gcspb_flapr : 270.0) Glycine dehydrogenase [decarboxylating] B, mitochondrial precursor (EC 1.4.4.2) (Glycine decarboxylase B) (Glycine cleavage system P-protein B) - Flaveria pringlei & (at4g33010 : 264.0) glycine decarboxylase P-protein 1 (GLDP1); FUNCTIONS IN: glycine dehydrogenase (decarboxylating) activity, protein binding; INVOLVED IN: glycine catabolic process, response to cadmium …
Bin: 1.2.4.1	PS.photorespiration.glycine cleavage.P subunit
	Id: seq_69138
	(p49362|gcspb_flapr : 184.0) Glycine dehydrogenase [decarboxylating] B, mitochondrial precursor (EC 1.4.4.2) (Glycine decarboxylase B) (Glycine cleavage system P-protein B) - Flaveria pringlei & (at4g33010 : 175.0) glycine decarboxylase P-protein 1 (GLDP1); FUNCTIONS IN: glycine dehydrogenase (decarboxylating) activity, protein binding; INVOLVED IN: glycine catabolic process, response to cadmium …
Bin: 1.2.4.1	PS.photorespiration.glycine cleavage.P subunit
	Id: seq_85606
	(p49362|gcspb_flapr : 145.0) Glycine dehydrogenase [decarboxylating] B, mitochondrial precursor (EC 1.4.4.2) (Glycine decarboxylase B) (Glycine cleavage system P-protein B) - Flaveria pringlei & (at2g26080 : 136.0) glycine decarboxylase P-protein 2 (GLDP2); FUNCTIONS IN: glycine dehydrogenase (decarboxylating) activity, ATP binding; INVOLVED IN: oxidation reduction, glycine decarboxylation via gl…
Bin: 1.2.4.1	PS.photorespiration.glycine cleavage.P subunit
	Id: seq_90724
	(at2g26080 : 109.0) glycine decarboxylase P-protein 2 (GLDP2); FUNCTIONS IN: glycine dehydrogenase (decarboxylating) activity, ATP binding; INVOLVED IN: oxidation reduction, glycine decarboxylation via glycine cleavage system, glycine metabolic process; LOCATED IN: mitochondrion, glycine cleavage complex, chloroplast, chloroplast envelope; EXPRESSED IN: 33 plant structures; EXPRESSED DURING: 16 g…
Bin: 1.2.3	PS.photorespiration.aminotransferases peroxisomal
	Id: seq_969
	(at1g70580 : 884.0) Encodes a protein with glyoxylate aminotransferase activity. It can act on a number of different small substrates and amino acids in vitro.; alanine-2-oxoglutarate aminotransferase 2 (AOAT2); FUNCTIONS IN: glycine:2-oxoglutarate aminotransferase activity, L-alanine:2-oxoglutarate aminotransferase activity, alanine-glyoxylate transaminase activity; INVOLVED IN: photorespiration…
Bin: 1.2.3	PS.photorespiration.aminotransferases peroxisomal
	Id: seq_10084
	(at2g13360 : 207.0) Encodes a peroxisomal photorespiratory enzyme that catalyzes transamination reactions with multiple substrates. It is involved in photorespiration.; alanine:glyoxylate aminotransferase (AGT); FUNCTIONS IN: serine-pyruvate transaminase activity, serine-glyoxylate transaminase activity, alanine-glyoxylate transaminase activity; INVOLVED IN: photorespiration; LOCATED IN: apoplast…
Bin: 1.2.3	PS.photorespiration.aminotransferases peroxisomal
	Id: seq_21021
	(at2g13360 : 280.0) Encodes a peroxisomal photorespiratory enzyme that catalyzes transamination reactions with multiple substrates. It is involved in photorespiration.; alanine:glyoxylate aminotransferase (AGT); FUNCTIONS IN: serine-pyruvate transaminase activity, serine-glyoxylate transaminase activity, alanine-glyoxylate transaminase activity; INVOLVED IN: photorespiration; LOCATED IN: apoplast…
Bin: 1.2.3	PS.photorespiration.aminotransferases peroxisomal
	Id: seq_24232
	(at2g13360 : 143.0) Encodes a peroxisomal photorespiratory enzyme that catalyzes transamination reactions with multiple substrates. It is involved in photorespiration.; alanine:glyoxylate aminotransferase (AGT); FUNCTIONS IN: serine-pyruvate transaminase activity, serine-glyoxylate transaminase activity, alanine-glyoxylate transaminase activity; INVOLVED IN: photorespiration; LOCATED IN: apoplast…
Bin: 1.2.3	PS.photorespiration.aminotransferases peroxisomal
	Id: seq_49392
	(at1g70580 : 105.0) Encodes a protein with glyoxylate aminotransferase activity. It can act on a number of different small substrates and amino acids in vitro.; alanine-2-oxoglutarate aminotransferase 2 (AOAT2); FUNCTIONS IN: glycine:2-oxoglutarate aminotransferase activity, L-alanine:2-oxoglutarate aminotransferase activity, alanine-glyoxylate transaminase activity; INVOLVED IN: photorespiration…
Bin: 1.2.3	PS.photorespiration.aminotransferases peroxisomal
	Id: seq_49644
	(at1g23310 : 85.5) Identified by cloning the gene that corresponded to a purified protein having glyoxylate aminotransferase activity. Localized to the peroxisome and thought to be involved in photorespiration/ metabolic salvage pathway.; glutamate:glyoxylate aminotransferase (GGT1); FUNCTIONS IN: glycine:2-oxoglutarate aminotransferase activity, L-alanine:2-oxoglutarate aminotransferase activity…
Bin: 1.2.2	PS.photorespiration.glycolate oxydase
	Id: seq_572
	(at3g14420 : 635.0) Aldolase-type TIM barrel family protein; FUNCTIONS IN: glycolate oxidase activity; INVOLVED IN: oxidation reduction, metabolic process; LOCATED IN: apoplast, chloroplast, peroxisome, membrane; EXPRESSED IN: cotyledon, guard cell, leaf; EXPRESSED DURING: seedling growth; CONTAINS InterPro DOMAIN/s: Aldolase-type TIM barrel (InterPro:IPR013785), FMN-dependent alpha-hydroxy acid …
Bin: 1.2.2	PS.photorespiration.glycolate oxydase
	Id: seq_2759
	(at3g14415 : 234.0) Aldolase-type TIM barrel family protein; FUNCTIONS IN: glycolate oxidase activity, oxidoreductase activity, FMN binding, catalytic activity; INVOLVED IN: oxidation reduction, metabolic process; LOCATED IN: peroxisome; EXPRESSED IN: guard cell, leaf; CONTAINS InterPro DOMAIN/s: Aldolase-type TIM barrel (InterPro:IPR013785), FMN-dependent alpha-hydroxy acid dehydrogenase, active…
Bin: 1.2.2	PS.photorespiration.glycolate oxydase
	Id: seq_6111
	(p05414|gox_spiol : 157.0) Peroxisomal (S)-2-hydroxy-acid oxidase (EC 1.1.3.15) (Glycolate oxidase) (GOX) (Short chain alpha-hydroxy acid oxidase) - Spinacia oleracea (Spinach) & (at3g14420 : 155.0) Aldolase-type TIM barrel family protein; FUNCTIONS IN: glycolate oxidase activity; INVOLVED IN: oxidation reduction, metabolic process; LOCATED IN: apoplast, chloroplast, peroxisome, membrane; EXPRESS…
Bin: 1.2.2	PS.photorespiration.glycolate oxydase
	Id: seq_12319
	(at3g14130 : 290.0) Aldolase-type TIM barrel family protein; FUNCTIONS IN: glycolate oxidase activity, oxidoreductase activity, FMN binding, catalytic activity; INVOLVED IN: oxidation reduction, metabolic process; CONTAINS InterPro DOMAIN/s: Aldolase-type TIM barrel (InterPro:IPR013785), FMN-dependent alpha-hydroxy acid dehydrogenase, active site (InterPro:IPR008259), FMN-dependent dehydrogenase …
Bin: 1.2.2	PS.photorespiration.glycolate oxydase
	Id: seq_14094
	(at3g14150 : 509.0) Aldolase-type TIM barrel family protein; FUNCTIONS IN: glycolate oxidase activity, oxidoreductase activity, FMN binding, catalytic activity; INVOLVED IN: oxidation reduction, metabolic process; LOCATED IN: peroxisome; CONTAINS InterPro DOMAIN/s: Aldolase-type TIM barrel (InterPro:IPR013785), FMN-dependent alpha-hydroxy acid dehydrogenase, active site (InterPro:IPR008259), FMN-…
Bin: 1.2.2	PS.photorespiration.glycolate oxydase
	Id: seq_20182
	(p05414|gox_spiol : 115.0) Peroxisomal (S)-2-hydroxy-acid oxidase (EC 1.1.3.15) (Glycolate oxidase) (GOX) (Short chain alpha-hydroxy acid oxidase) - Spinacia oleracea (Spinach) & (at3g14420 : 114.0) Aldolase-type TIM barrel family protein; FUNCTIONS IN: glycolate oxidase activity; INVOLVED IN: oxidation reduction, metabolic process; LOCATED IN: apoplast, chloroplast, peroxisome, membrane; EXPRESS…
Bin: 1.2.2	PS.photorespiration.glycolate oxydase
	Id: seq_20934
	(at3g14130 : 461.0) Aldolase-type TIM barrel family protein; FUNCTIONS IN: glycolate oxidase activity, oxidoreductase activity, FMN binding, catalytic activity; INVOLVED IN: oxidation reduction, metabolic process; CONTAINS InterPro DOMAIN/s: Aldolase-type TIM barrel (InterPro:IPR013785), FMN-dependent alpha-hydroxy acid dehydrogenase, active site (InterPro:IPR008259), FMN-dependent dehydrogenase …
Bin: 1.2.2	PS.photorespiration.glycolate oxydase
	Id: seq_23083
	(at3g14130 : 453.0) Aldolase-type TIM barrel family protein; FUNCTIONS IN: glycolate oxidase activity, oxidoreductase activity, FMN binding, catalytic activity; INVOLVED IN: oxidation reduction, metabolic process; CONTAINS InterPro DOMAIN/s: Aldolase-type TIM barrel (InterPro:IPR013785), FMN-dependent alpha-hydroxy acid dehydrogenase, active site (InterPro:IPR008259), FMN-dependent dehydrogenase …
Bin: 1.2.2	PS.photorespiration.glycolate oxydase
	Id: seq_23453
	(at3g14130 : 265.0) Aldolase-type TIM barrel family protein; FUNCTIONS IN: glycolate oxidase activity, oxidoreductase activity, FMN binding, catalytic activity; INVOLVED IN: oxidation reduction, metabolic process; CONTAINS InterPro DOMAIN/s: Aldolase-type TIM barrel (InterPro:IPR013785), FMN-dependent alpha-hydroxy acid dehydrogenase, active site (InterPro:IPR008259), FMN-dependent dehydrogenase …
Bin: 1.2.2	PS.photorespiration.glycolate oxydase
	Id: seq_25881
	(at3g14130 : 317.0) Aldolase-type TIM barrel family protein; FUNCTIONS IN: glycolate oxidase activity, oxidoreductase activity, FMN binding, catalytic activity; INVOLVED IN: oxidation reduction, metabolic process; CONTAINS InterPro DOMAIN/s: Aldolase-type TIM barrel (InterPro:IPR013785), FMN-dependent alpha-hydroxy acid dehydrogenase, active site (InterPro:IPR008259), FMN-dependent dehydrogenase …
Bin: 1.2.2	PS.photorespiration.glycolate oxydase
	Id: seq_29600
	(at3g14130 : 174.0) Aldolase-type TIM barrel family protein; FUNCTIONS IN: glycolate oxidase activity, oxidoreductase activity, FMN binding, catalytic activity; INVOLVED IN: oxidation reduction, metabolic process; CONTAINS InterPro DOMAIN/s: Aldolase-type TIM barrel (InterPro:IPR013785), FMN-dependent alpha-hydroxy acid dehydrogenase, active site (InterPro:IPR008259), FMN-dependent dehydrogenase …
Bin: 1.2.2	PS.photorespiration.glycolate oxydase
	Id: seq_32475
	(at3g14415 : 101.0) Aldolase-type TIM barrel family protein; FUNCTIONS IN: glycolate oxidase activity, oxidoreductase activity, FMN binding, catalytic activity; INVOLVED IN: oxidation reduction, metabolic process; LOCATED IN: peroxisome; EXPRESSED IN: guard cell, leaf; CONTAINS InterPro DOMAIN/s: Aldolase-type TIM barrel (InterPro:IPR013785), FMN-dependent alpha-hydroxy acid dehydrogenase, active…
Bin: 1.2.2	PS.photorespiration.glycolate oxydase
	Id: seq_32650
	(at3g14130 : 314.0) Aldolase-type TIM barrel family protein; FUNCTIONS IN: glycolate oxidase activity, oxidoreductase activity, FMN binding, catalytic activity; INVOLVED IN: oxidation reduction, metabolic process; CONTAINS InterPro DOMAIN/s: Aldolase-type TIM barrel (InterPro:IPR013785), FMN-dependent alpha-hydroxy acid dehydrogenase, active site (InterPro:IPR008259), FMN-dependent dehydrogenase …
Bin: 1.2.2	PS.photorespiration.glycolate oxydase
	Id: seq_33971
	(at3g14130 : 234.0) Aldolase-type TIM barrel family protein; FUNCTIONS IN: glycolate oxidase activity, oxidoreductase activity, FMN binding, catalytic activity; INVOLVED IN: oxidation reduction, metabolic process; CONTAINS InterPro DOMAIN/s: Aldolase-type TIM barrel (InterPro:IPR013785), FMN-dependent alpha-hydroxy acid dehydrogenase, active site (InterPro:IPR008259), FMN-dependent dehydrogenase …
Bin: 1.2.2	PS.photorespiration.glycolate oxydase
	Id: seq_46305
	(at3g14130 : 184.0) Aldolase-type TIM barrel family protein; FUNCTIONS IN: glycolate oxidase activity, oxidoreductase activity, FMN binding, catalytic activity; INVOLVED IN: oxidation reduction, metabolic process; CONTAINS InterPro DOMAIN/s: Aldolase-type TIM barrel (InterPro:IPR013785), FMN-dependent alpha-hydroxy acid dehydrogenase, active site (InterPro:IPR008259), FMN-dependent dehydrogenase …
Bin: 1.2.2	PS.photorespiration.glycolate oxydase
	Id: seq_46471
	(at3g14130 : 206.0) Aldolase-type TIM barrel family protein; FUNCTIONS IN: glycolate oxidase activity, oxidoreductase activity, FMN binding, catalytic activity; INVOLVED IN: oxidation reduction, metabolic process; CONTAINS InterPro DOMAIN/s: Aldolase-type TIM barrel (InterPro:IPR013785), FMN-dependent alpha-hydroxy acid dehydrogenase, active site (InterPro:IPR008259), FMN-dependent dehydrogenase …
Bin: 1.2.2	PS.photorespiration.glycolate oxydase
	Id: seq_46511
	(at3g14130 : 156.0) Aldolase-type TIM barrel family protein; FUNCTIONS IN: glycolate oxidase activity, oxidoreductase activity, FMN binding, catalytic activity; INVOLVED IN: oxidation reduction, metabolic process; CONTAINS InterPro DOMAIN/s: Aldolase-type TIM barrel (InterPro:IPR013785), FMN-dependent alpha-hydroxy acid dehydrogenase, active site (InterPro:IPR008259), FMN-dependent dehydrogenase …
Bin: 1.2.2	PS.photorespiration.glycolate oxydase
	Id: seq_56635
	(at3g14150 : 136.0) Aldolase-type TIM barrel family protein; FUNCTIONS IN: glycolate oxidase activity, oxidoreductase activity, FMN binding, catalytic activity; INVOLVED IN: oxidation reduction, metabolic process; LOCATED IN: peroxisome; CONTAINS InterPro DOMAIN/s: Aldolase-type TIM barrel (InterPro:IPR013785), FMN-dependent alpha-hydroxy acid dehydrogenase, active site (InterPro:IPR008259), FMN-…
Bin: 1.2.2	PS.photorespiration.glycolate oxydase
	Id: seq_58184
	(at3g14130 : 141.0) Aldolase-type TIM barrel family protein; FUNCTIONS IN: glycolate oxidase activity, oxidoreductase activity, FMN binding, catalytic activity; INVOLVED IN: oxidation reduction, metabolic process; CONTAINS InterPro DOMAIN/s: Aldolase-type TIM barrel (InterPro:IPR013785), FMN-dependent alpha-hydroxy acid dehydrogenase, active site (InterPro:IPR008259), FMN-dependent dehydrogenase …
Bin: 1.2.2	PS.photorespiration.glycolate oxydase
	Id: seq_68316
	(at3g14130 : 145.0) Aldolase-type TIM barrel family protein; FUNCTIONS IN: glycolate oxidase activity, oxidoreductase activity, FMN binding, catalytic activity; INVOLVED IN: oxidation reduction, metabolic process; CONTAINS InterPro DOMAIN/s: Aldolase-type TIM barrel (InterPro:IPR013785), FMN-dependent alpha-hydroxy acid dehydrogenase, active site (InterPro:IPR008259), FMN-dependent dehydrogenase …
Bin: 1.2.2	PS.photorespiration.glycolate oxydase
	Id: seq_70523
	(at3g14150 : 111.0) Aldolase-type TIM barrel family protein; FUNCTIONS IN: glycolate oxidase activity, oxidoreductase activity, FMN binding, catalytic activity; INVOLVED IN: oxidation reduction, metabolic process; LOCATED IN: peroxisome; CONTAINS InterPro DOMAIN/s: Aldolase-type TIM barrel (InterPro:IPR013785), FMN-dependent alpha-hydroxy acid dehydrogenase, active site (InterPro:IPR008259), FMN-…
Bin: 1.2.2	PS.photorespiration.glycolate oxydase
	Id: seq_72935
	(at3g14130 : 142.0) Aldolase-type TIM barrel family protein; FUNCTIONS IN: glycolate oxidase activity, oxidoreductase activity, FMN binding, catalytic activity; INVOLVED IN: oxidation reduction, metabolic process; CONTAINS InterPro DOMAIN/s: Aldolase-type TIM barrel (InterPro:IPR013785), FMN-dependent alpha-hydroxy acid dehydrogenase, active site (InterPro:IPR008259), FMN-dependent dehydrogenase …
Bin: 1.2.2	PS.photorespiration.glycolate oxydase
	Id: seq_79961
	(at3g14130 : 81.3) Aldolase-type TIM barrel family protein; FUNCTIONS IN: glycolate oxidase activity, oxidoreductase activity, FMN binding, catalytic activity; INVOLVED IN: oxidation reduction, metabolic process; CONTAINS InterPro DOMAIN/s: Aldolase-type TIM barrel (InterPro:IPR013785), FMN-dependent alpha-hydroxy acid dehydrogenase, active site (InterPro:IPR008259), FMN-dependent dehydrogenase (…
Bin: 1.2.2	PS.photorespiration.glycolate oxydase
	Id: seq_94417
	(at3g14130 : 257.0) Aldolase-type TIM barrel family protein; FUNCTIONS IN: glycolate oxidase activity, oxidoreductase activity, FMN binding, catalytic activity; INVOLVED IN: oxidation reduction, metabolic process; CONTAINS InterPro DOMAIN/s: Aldolase-type TIM barrel (InterPro:IPR013785), FMN-dependent alpha-hydroxy acid dehydrogenase, active site (InterPro:IPR008259), FMN-dependent dehydrogenase …
Bin: 1.2.2	PS.photorespiration.glycolate oxydase
	Id: seq_104055
	(p05414|gox_spiol : 92.8) Peroxisomal (S)-2-hydroxy-acid oxidase (EC 1.1.3.15) (Glycolate oxidase) (GOX) (Short chain alpha-hydroxy acid oxidase) - Spinacia oleracea (Spinach) & (at3g14420 : 88.6) Aldolase-type TIM barrel family protein; FUNCTIONS IN: glycolate oxidase activity; INVOLVED IN: oxidation reduction, metabolic process; LOCATED IN: apoplast, chloroplast, peroxisome, membrane; EXPRESSED…
Bin: 1.2.2	PS.photorespiration.glycolate oxydase
	Id: seq_111195
	(at3g14420 : 127.0) Aldolase-type TIM barrel family protein; FUNCTIONS IN: glycolate oxidase activity; INVOLVED IN: oxidation reduction, metabolic process; LOCATED IN: apoplast, chloroplast, peroxisome, membrane; EXPRESSED IN: cotyledon, guard cell, leaf; EXPRESSED DURING: seedling growth; CONTAINS InterPro DOMAIN/s: Aldolase-type TIM barrel (InterPro:IPR013785), FMN-dependent alpha-hydroxy acid …
Bin: 1.2.2	PS.photorespiration.glycolate oxydase
	Id: seq_117036
	(at3g14130 : 89.0) Aldolase-type TIM barrel family protein; FUNCTIONS IN: glycolate oxidase activity, oxidoreductase activity, FMN binding, catalytic activity; INVOLVED IN: oxidation reduction, metabolic process; CONTAINS InterPro DOMAIN/s: Aldolase-type TIM barrel (InterPro:IPR013785), FMN-dependent alpha-hydroxy acid dehydrogenase, active site (InterPro:IPR008259), FMN-dependent dehydrogenase (…
Bin: 1.2.2	PS.photorespiration.glycolate oxydase
	Id: seq_118308
	(at3g14130 : 121.0) Aldolase-type TIM barrel family protein; FUNCTIONS IN: glycolate oxidase activity, oxidoreductase activity, FMN binding, catalytic activity; INVOLVED IN: oxidation reduction, metabolic process; CONTAINS InterPro DOMAIN/s: Aldolase-type TIM barrel (InterPro:IPR013785), FMN-dependent alpha-hydroxy acid dehydrogenase, active site (InterPro:IPR008259), FMN-dependent dehydrogenase …
Bin: 1.2.2	PS.photorespiration.glycolate oxydase
	Id: seq_118473
	(at3g14130 : 104.0) Aldolase-type TIM barrel family protein; FUNCTIONS IN: glycolate oxidase activity, oxidoreductase activity, FMN binding, catalytic activity; INVOLVED IN: oxidation reduction, metabolic process; CONTAINS InterPro DOMAIN/s: Aldolase-type TIM barrel (InterPro:IPR013785), FMN-dependent alpha-hydroxy acid dehydrogenase, active site (InterPro:IPR008259), FMN-dependent dehydrogenase …
Bin: 1.2.1	PS.photorespiration.phosphoglycolate phosphatase
	Id: seq_1028
	(at5g36700 : 501.0) 2-phosphoglycolate phosphatase 1 (PGLP1); FUNCTIONS IN: phosphoglycolate phosphatase activity; INVOLVED IN: metabolic process; EXPRESSED IN: 7 plant structures; CONTAINS InterPro DOMAIN/s: HAD-superfamily hydrolase, subfamily IIA (InterPro:IPR006357), 2-phosphoglycolate phosphatase, eukaryotic (InterPro:IPR006349); BEST Arabidopsis thaliana protein match is: Haloacid dehalogen…
Bin: 1.2.1	PS.photorespiration.phosphoglycolate phosphatase
	Id: seq_18012
	(at5g36700 : 94.7) 2-phosphoglycolate phosphatase 1 (PGLP1); FUNCTIONS IN: phosphoglycolate phosphatase activity; INVOLVED IN: metabolic process; EXPRESSED IN: 7 plant structures; CONTAINS InterPro DOMAIN/s: HAD-superfamily hydrolase, subfamily IIA (InterPro:IPR006357), 2-phosphoglycolate phosphatase, eukaryotic (InterPro:IPR006349); BEST Arabidopsis thaliana protein match is: Haloacid dehalogena…
Bin: 1.2.1	PS.photorespiration.phosphoglycolate phosphatase
	Id: seq_19755
	(at5g36700 : 102.0) 2-phosphoglycolate phosphatase 1 (PGLP1); FUNCTIONS IN: phosphoglycolate phosphatase activity; INVOLVED IN: metabolic process; EXPRESSED IN: 7 plant structures; CONTAINS InterPro DOMAIN/s: HAD-superfamily hydrolase, subfamily IIA (InterPro:IPR006357), 2-phosphoglycolate phosphatase, eukaryotic (InterPro:IPR006349); BEST Arabidopsis thaliana protein match is: Haloacid dehalogen…
Bin: 1.2	PS.photorespiration
	Id: seq_20562
	(at5g47435 : 501.0) encodes one of the two putative formyltetrahydrofolate deformylase. Located in the mitochondrion. Involved in photorespiratory tetrahydrofolate cycle.; formyltetrahydrofolate deformylase, putative; FUNCTIONS IN: hydroxymethyl-, formyl- and related transferase activity, formyltetrahydrofolate deformylase activity; INVOLVED IN: tetrahydrofolate metabolic process, purine ribonucl…
Bin: 1.1.40	PS.lightreaction.cyclic electron flow-chlororespiration
	Id: seq_511
	(at4g22890 : 472.0) Encodes PGRL1A, a transmembrane protein present in thylakoids. PGRL1A has a highly homologous isoform PGRL1B encoded by At4g11960. Plants lacking PGRL1 show perturbation of cyclic electron flow, similar to PGR5-deficient plants. PGRL1 and PGR5 interact physically and associate with PSI (photosystem I).; PGR5-LIKE A; FUNCTIONS IN: molecular_function unknown; INVOLVED IN: photos…
Bin: 1.1.40	PS.lightreaction.cyclic electron flow-chlororespiration
	Id: seq_3149
	(at4g22260 : 452.0) Similar to mitochondrial alternative oxidase. im mutants have a variegated phenotype and fail to differentiate chloroplasts in the majority of their cells under high light intensity continuous illumination. The white tissues of immutans accumulate phytoene, a non-colored C40 carotenoid intermediate. This suggests that immutans controls, either directly or indirectly, the activ…
Bin: 1.1.40	PS.lightreaction.cyclic electron flow-chlororespiration
	Id: seq_4181
	(at3g15840 : 370.0) Encodes a chloroplast-targeted protein localized in the stroma that is a novel component essential for NDH-mediated non-photochemical reduction of the plastoquinone pool in chlororespiratory electron transport.; post-illumination chlorophyll fluorescence increase (PIFI); FUNCTIONS IN: molecular_function unknown; INVOLVED IN: chlororespiration; LOCATED IN: chloroplast stroma; E…
Bin: 1.1.40	PS.lightreaction.cyclic electron flow-chlororespiration
	Id: seq_5836
	(at4g11960 : 129.0) Encodes PGRL1B, a transmembrane protein present in thylakoids. PGRL1B has a highly homologous isoform PGRL1A encoded by At4g22890. Plants lacking PGRL1 show perturbation of cyclic electron flow, similar to PGR5-deficient plants. PGRL1 and PGR5 interact physically and associate with PSI (photosystem I).; PGR5-like B (PGRL1B); FUNCTIONS IN: molecular_function unknown; INVOLVED I…
Bin: 1.1.40	PS.lightreaction.cyclic electron flow-chlororespiration
	Id: seq_6567
	(at3g15840 : 166.0) Encodes a chloroplast-targeted protein localized in the stroma that is a novel component essential for NDH-mediated non-photochemical reduction of the plastoquinone pool in chlororespiratory electron transport.; post-illumination chlorophyll fluorescence increase (PIFI); FUNCTIONS IN: molecular_function unknown; INVOLVED IN: chlororespiration; LOCATED IN: chloroplast stroma; E…
Bin: 1.1.40	PS.lightreaction.cyclic electron flow-chlororespiration
	Id: seq_9332
	(at1g64770 : 394.0) encodes a novel subunit of the chloroplast NAD(P)H dehydrogenase complex, involved in cyclic electron flow around photosystem I to produce ATP.; NDH-dependent cyclic electron flow 1 (NDF2); BEST Arabidopsis thaliana protein match is: NDH-dependent cyclic electron flow 5 (TAIR:AT1G55370.2). & (reliability: 788.0) & (original description: no original description)
Bin: 1.1.40	PS.lightreaction.cyclic electron flow-chlororespiration
	Id: seq_9373
	(at2g05620 : 177.0) Involved in electron flow in Photosystem I. Essential for photoprotection.; proton gradient regulation 5 (PGR5); FUNCTIONS IN: electron carrier activity; INVOLVED IN: response to water deprivation, response to high light intensity, photosynthetic electron transport in photosystem I; LOCATED IN: chloroplast thylakoid membrane, chloroplast, chloroplast thylakoid; EXPRESSED IN: 3…
Bin: 1.1.40	PS.lightreaction.cyclic electron flow-chlororespiration
	Id: seq_19544
	(at4g22890 : 142.0) Encodes PGRL1A, a transmembrane protein present in thylakoids. PGRL1A has a highly homologous isoform PGRL1B encoded by At4g11960. Plants lacking PGRL1 show perturbation of cyclic electron flow, similar to PGR5-deficient plants. PGRL1 and PGR5 interact physically and associate with PSI (photosystem I).; PGR5-LIKE A; FUNCTIONS IN: molecular_function unknown; INVOLVED IN: photos…
Bin: 1.1.40	PS.lightreaction.cyclic electron flow-chlororespiration
	Id: seq_26707
	(at4g22890 : 111.0) Encodes PGRL1A, a transmembrane protein present in thylakoids. PGRL1A has a highly homologous isoform PGRL1B encoded by At4g11960. Plants lacking PGRL1 show perturbation of cyclic electron flow, similar to PGR5-deficient plants. PGRL1 and PGR5 interact physically and associate with PSI (photosystem I).; PGR5-LIKE A; FUNCTIONS IN: molecular_function unknown; INVOLVED IN: photos…
Bin: 1.1.40	PS.lightreaction.cyclic electron flow-chlororespiration
	Id: seq_45815
	(at4g22260 : 130.0) Similar to mitochondrial alternative oxidase. im mutants have a variegated phenotype and fail to differentiate chloroplasts in the majority of their cells under high light intensity continuous illumination. The white tissues of immutans accumulate phytoene, a non-colored C40 carotenoid intermediate. This suggests that immutans controls, either directly or indirectly, the activ…
Bin: 1.1.40	PS.lightreaction.cyclic electron flow-chlororespiration
	Id: seq_47353
	(q68ru6|nu2c_pangi : 608.0) NAD(P)H-quinone oxidoreductase chain 2, chloroplast (EC 1.6.5.-) (NAD(P)H dehydrogenase, chain 2) (NADH-plastoquinone oxidoreductase chain 2) - Panax ginseng (Korean ginseng) & (atcg01250 : 395.0) NADH dehydrogenase ND2; NDHB.2; FUNCTIONS IN: NADH dehydrogenase (ubiquinone) activity; INVOLVED IN: oxidation reduction, ATP synthesis coupled electron transport; LOCATED IN…
Bin: 1.1.40	PS.lightreaction.cyclic electron flow-chlororespiration
	Id: seq_48814
	(at1g64770 : 102.0) encodes a novel subunit of the chloroplast NAD(P)H dehydrogenase complex, involved in cyclic electron flow around photosystem I to produce ATP.; NDH-dependent cyclic electron flow 1 (NDF2); BEST Arabidopsis thaliana protein match is: NDH-dependent cyclic electron flow 5 (TAIR:AT1G55370.2). & (reliability: 204.0) & (original description: no original description)
Bin: 1.1.40	PS.lightreaction.cyclic electron flow-chlororespiration
	Id: seq_54902
	(q68rv1|nu1c_pangi : 134.0) NAD(P)H-quinone oxidoreductase subunit 1, chloroplast (EC 1.6.5.-) (NAD(P)H dehydrogenase subunit 1) (NDH subunit 1) (NADH-plastoquinone oxidoreductase subunit 1) - Panax ginseng (Korean ginseng) & (atcg01100 : 118.0) NADH dehydrogenase ND1; NDHA; FUNCTIONS IN: oxidoreductase activity, acting on NADH or NADPH; INVOLVED IN: photosynthesis; LOCATED IN: chloroplast, membr…
Bin: 1.1.40	PS.lightreaction.cyclic electron flow-chlororespiration
	Id: seq_64424
	(q9m3i6|nu1c_spiol : 310.0) NAD(P)H-quinone oxidoreductase subunit 1, chloroplast (EC 1.6.5.-) (NAD(P)H dehydrogenase subunit 1) (NDH subunit 1) (NADH-plastoquinone oxidoreductase subunit 1) - Spinacia oleracea (Spinach) & (atcg01100 : 299.0) NADH dehydrogenase ND1; NDHA; FUNCTIONS IN: oxidoreductase activity, acting on NADH or NADPH; INVOLVED IN: photosynthesis; LOCATED IN: chloroplast, membrane…
Bin: 1.1.40	PS.lightreaction.cyclic electron flow-chlororespiration
	Id: seq_71467
	(q4vzk8|nu2c_cucsa : 172.0) NAD(P)H-quinone oxidoreductase chain 2 (EC 1.6.5.-) (NAD(P)H dehydrogenase I, chain 2) (NDH-1, chain 2) - Cucumis sativus (Cucumber) & (atcg01250 : 165.0) NADH dehydrogenase ND2; NDHB.2; FUNCTIONS IN: NADH dehydrogenase (ubiquinone) activity; INVOLVED IN: oxidation reduction, ATP synthesis coupled electron transport; LOCATED IN: endomembrane system; CONTAINS InterPro D…
Bin: 1.1.40	PS.lightreaction.cyclic electron flow-chlororespiration
	Id: seq_75444
	(q9m3i5|ndhh_spiol : 693.0) NAD(P)H-quinone oxidoreductase chain H, chloroplast (EC 1.6.5.-) (NAD(P)H dehydrogenase, chain H) (NADH-plastoquinone oxidoreductase 49 kDa subunit) - Spinacia oleracea (Spinach) & (atcg01110 : 678.0) Encodes the 49KDa plastid NAD(P)H dehydrogenase subunit H protein. Its transcription is regulated by an ndhF-specific plastid sigma factor, SIG4.; NAD(P)H dehydrogenase s…
Bin: 1.1.40	PS.lightreaction.cyclic electron flow-chlororespiration
	Id: seq_87263
	(atcg01090 : 149.0) Encodes subunit of the chloroplast NAD(P)H dehydrogenase complex; NDHI; FUNCTIONS IN: NADPH dehydrogenase activity; INVOLVED IN: photosynthesis; LOCATED IN: chloroplast thylakoid membrane, chloroplast; EXPRESSED IN: 23 plant structures; EXPRESSED DURING: 13 growth stages; CONTAINS InterPro DOMAIN/s: NADH-plastoquinone oxidoreductase, subunit I (InterPro:IPR004497), 4Fe-4S bind…
Bin: 1.1.40	PS.lightreaction.cyclic electron flow-chlororespiration
	Id: seq_100670
	(p06254|nu1c_tobac : 157.0) NAD(P)H-quinone oxidoreductase subunit 1, chloroplast (EC 1.6.5.-) (NAD(P)H dehydrogenase subunit 1) (NDH subunit 1) (NADH-plastoquinone oxidoreductase subunit 1) - Nicotiana tabacum (Common tobacco) & (atcg01100 : 156.0) NADH dehydrogenase ND1; NDHA; FUNCTIONS IN: oxidoreductase activity, acting on NADH or NADPH; INVOLVED IN: photosynthesis; LOCATED IN: chloroplast, m…
Bin: 1.1.40	PS.lightreaction.cyclic electron flow-chlororespiration
	Id: seq_119328
	(q0ziw4|ndhi_vitvi : 103.0) NAD(P)H-quinone oxidoreductase subunit I, chloroplast (EC 1.6.5.-) (NAD(P)H dehydrogenase subunit I) (NDH subunit I) (NADH-plastoquinone oxidoreductase subunit I) - Vitis vinifera (Grape) & (atcg01090 : 96.3) Encodes subunit of the chloroplast NAD(P)H dehydrogenase complex; NDHI; FUNCTIONS IN: NADPH dehydrogenase activity; INVOLVED IN: photosynthesis; LOCATED IN: chlor…
Bin: 1.1.30	PS.lightreaction.state transition
	Id: seq_889
	(at4g02630 : 610.0) Protein kinase superfamily protein; FUNCTIONS IN: protein serine/threonine kinase activity, protein kinase activity, kinase activity, ATP binding; INVOLVED IN: protein amino acid phosphorylation; LOCATED IN: plasma membrane; EXPRESSED IN: 22 plant structures; EXPRESSED DURING: 13 growth stages; CONTAINS InterPro DOMAIN/s: Protein kinase, ATP binding site (InterPro:IPR017441), …
Bin: 1.1.30	PS.lightreaction.state transition
	Id: seq_1561
	(at1g68830 : 857.0) STN7 protein kinase; required for state transitions, phosphorylation of the major antenna complex (LHCII) between PSII and PSI, and light adaptation; STT7 homolog STN7 (STN7); FUNCTIONS IN: protein kinase activity, kinase activity; INVOLVED IN: regulation of photosynthesis, light reaction, circadian rhythm; LOCATED IN: chloroplast; EXPRESSED IN: 25 plant structures; EXPRESSED …
Bin: 1.1.30	PS.lightreaction.state transition
	Id: seq_3695
	(at4g02630 : 642.0) Protein kinase superfamily protein; FUNCTIONS IN: protein serine/threonine kinase activity, protein kinase activity, kinase activity, ATP binding; INVOLVED IN: protein amino acid phosphorylation; LOCATED IN: plasma membrane; EXPRESSED IN: 22 plant structures; EXPRESSED DURING: 13 growth stages; CONTAINS InterPro DOMAIN/s: Protein kinase, ATP binding site (InterPro:IPR017441), …
Bin: 1.1.30	PS.lightreaction.state transition
	Id: seq_12412
	(at1g68830 : 279.0) STN7 protein kinase; required for state transitions, phosphorylation of the major antenna complex (LHCII) between PSII and PSI, and light adaptation; STT7 homolog STN7 (STN7); FUNCTIONS IN: protein kinase activity, kinase activity; INVOLVED IN: regulation of photosynthesis, light reaction, circadian rhythm; LOCATED IN: chloroplast; EXPRESSED IN: 25 plant structures; EXPRESSED …
Bin: 1.1.30	PS.lightreaction.state transition
	Id: seq_15577
	(at1g01540 : 129.0) Protein kinase superfamily protein; FUNCTIONS IN: protein serine/threonine kinase activity, protein kinase activity, kinase activity, ATP binding; INVOLVED IN: protein amino acid phosphorylation; LOCATED IN: plasma membrane; EXPRESSED IN: 23 plant structures; EXPRESSED DURING: 13 growth stages; CONTAINS InterPro DOMAIN/s: Protein kinase, ATP binding site (InterPro:IPR017441), …
Bin: 1.1.30	PS.lightreaction.state transition
	Id: seq_19113
	(at4g02630 : 139.0) Protein kinase superfamily protein; FUNCTIONS IN: protein serine/threonine kinase activity, protein kinase activity, kinase activity, ATP binding; INVOLVED IN: protein amino acid phosphorylation; LOCATED IN: plasma membrane; EXPRESSED IN: 22 plant structures; EXPRESSED DURING: 13 growth stages; CONTAINS InterPro DOMAIN/s: Protein kinase, ATP binding site (InterPro:IPR017441), …
Bin: 1.1.30	PS.lightreaction.state transition
	Id: seq_26506
	(at4g02630 : 99.4) Protein kinase superfamily protein; FUNCTIONS IN: protein serine/threonine kinase activity, protein kinase activity, kinase activity, ATP binding; INVOLVED IN: protein amino acid phosphorylation; LOCATED IN: plasma membrane; EXPRESSED IN: 22 plant structures; EXPRESSED DURING: 13 growth stages; CONTAINS InterPro DOMAIN/s: Protein kinase, ATP binding site (InterPro:IPR017441), P…
Bin: 1.1.30	PS.lightreaction.state transition
	Id: seq_35434
	(at1g01540 : 168.0) Protein kinase superfamily protein; FUNCTIONS IN: protein serine/threonine kinase activity, protein kinase activity, kinase activity, ATP binding; INVOLVED IN: protein amino acid phosphorylation; LOCATED IN: plasma membrane; EXPRESSED IN: 23 plant structures; EXPRESSED DURING: 13 growth stages; CONTAINS InterPro DOMAIN/s: Protein kinase, ATP binding site (InterPro:IPR017441), …
Bin: 1.1.30	PS.lightreaction.state transition
	Id: seq_37393
	(at1g01540 : 143.0) Protein kinase superfamily protein; FUNCTIONS IN: protein serine/threonine kinase activity, protein kinase activity, kinase activity, ATP binding; INVOLVED IN: protein amino acid phosphorylation; LOCATED IN: plasma membrane; EXPRESSED IN: 23 plant structures; EXPRESSED DURING: 13 growth stages; CONTAINS InterPro DOMAIN/s: Protein kinase, ATP binding site (InterPro:IPR017441), …
Bin: 1.1.30	PS.lightreaction.state transition
	Id: seq_41112
	(at4g02630 : 97.8) Protein kinase superfamily protein; FUNCTIONS IN: protein serine/threonine kinase activity, protein kinase activity, kinase activity, ATP binding; INVOLVED IN: protein amino acid phosphorylation; LOCATED IN: plasma membrane; EXPRESSED IN: 22 plant structures; EXPRESSED DURING: 13 growth stages; CONTAINS InterPro DOMAIN/s: Protein kinase, ATP binding site (InterPro:IPR017441), P…
Bin: 1.1.30	PS.lightreaction.state transition
	Id: seq_48935
	(at1g01540 : 182.0) Protein kinase superfamily protein; FUNCTIONS IN: protein serine/threonine kinase activity, protein kinase activity, kinase activity, ATP binding; INVOLVED IN: protein amino acid phosphorylation; LOCATED IN: plasma membrane; EXPRESSED IN: 23 plant structures; EXPRESSED DURING: 13 growth stages; CONTAINS InterPro DOMAIN/s: Protein kinase, ATP binding site (InterPro:IPR017441), …
Bin: 1.1.30	PS.lightreaction.state transition
	Id: seq_52595
	(at4g01330 : 153.0) Protein kinase superfamily protein; FUNCTIONS IN: protein serine/threonine kinase activity, protein kinase activity, kinase activity, ATP binding; INVOLVED IN: protein amino acid phosphorylation; EXPRESSED IN: 22 plant structures; EXPRESSED DURING: 13 growth stages; CONTAINS InterPro DOMAIN/s: Protein kinase, ATP binding site (InterPro:IPR017441), Protein kinase, catalytic dom…
Bin: 1.1.30	PS.lightreaction.state transition
	Id: seq_60016
	(at4g34500 : 156.0) Protein kinase superfamily protein; FUNCTIONS IN: protein serine/threonine kinase activity, protein kinase activity, kinase activity, ATP binding; INVOLVED IN: protein amino acid phosphorylation; LOCATED IN: cellular_component unknown; EXPRESSED IN: 22 plant structures; EXPRESSED DURING: 13 growth stages; CONTAINS InterPro DOMAIN/s: Protein kinase, ATP binding site (InterPro:I…
Bin: 1.1.30	PS.lightreaction.state transition
	Id: seq_79772
	(at4g34500 : 152.0) Protein kinase superfamily protein; FUNCTIONS IN: protein serine/threonine kinase activity, protein kinase activity, kinase activity, ATP binding; INVOLVED IN: protein amino acid phosphorylation; LOCATED IN: cellular_component unknown; EXPRESSED IN: 22 plant structures; EXPRESSED DURING: 13 growth stages; CONTAINS InterPro DOMAIN/s: Protein kinase, ATP binding site (InterPro:I…
Bin: 1.1.30	PS.lightreaction.state transition
	Id: seq_80043
	(p17801|kpro_maize : 131.0) Putative receptor protein kinase ZmPK1 precursor (EC 2.7.11.1) - Zea mays (Maize) & (at1g34300 : 109.0) lectin protein kinase family protein; FUNCTIONS IN: in 6 functions; INVOLVED IN: protein amino acid phosphorylation, recognition of pollen; LOCATED IN: plasma membrane; EXPRESSED IN: 23 plant structures; EXPRESSED DURING: 13 growth stages; CONTAINS InterPro DOMAIN/s:…
Bin: 1.1.6	PS.lightreaction.NADH DH
	Id: seq_1735
	(at1g74880 : 166.0) Encodes subunit NDH-O of NAD(P)H:plastoquinone dehydrogenase complex (Ndh complex) present in the thylakoid membrane of chloroplasts. This subunit is thought to be required for Ndh complex assembly.; NAD(P)H:plastoquinone dehydrogenase complex subunit O (NDH-O); FUNCTIONS IN: oxidoreductase activity, acting on NADH or NADPH, quinone or similar compound as acceptor; INVOLVED IN…
Bin: 1.1.6	PS.lightreaction.NADH DH
	Id: seq_3859
	(at1g70760 : 187.0) a subunit of the chloroplast NAD(P)H dehydrogenase complex, involved in PSI cyclic electron transport. Located on the thylakoid membrane. Mutant has impaired NAD(P)H dehydrogenase activity.; CHLORORESPIRATORY REDUCTION 23 (CRR23); FUNCTIONS IN: oxidoreductase activity, acting on NADH or NADPH, quinone or similar compound as acceptor; INVOLVED IN: photosynthetic electron transp…
Bin: 1.1.6	PS.lightreaction.NADH DH
	Id: seq_7350
	(at5g58260 : 281.0) Encodes subunit NDH-N of NAD(P)H:plastoquinone dehydrogenase complex (Ndh complex) present in the thylakoid membrane of chloroplasts. This subunit is thought to be required for Ndh complex assembly.; oxidoreductases, acting on NADH or NADPH, quinone or similar compound as acceptor; FUNCTIONS IN: oxidoreductase activity, acting on NADH or NADPH, quinone or similar compound as a…
Bin: 1.1.6	PS.lightreaction.NADH DH
	Id: seq_8057
	(q9m3m1|ndhj_spiol : 323.0) NAD(P)H-quinone oxidoreductase chain J, chloroplast (EC 1.6.5.-) (NAD(P)H dehydrogenase, chain J) (NADH-plastoquinone oxidoreductase subunit J) - Spinacia oleracea (Spinach) & (atcg00420 : 305.0) Encodes NADH dehydrogenase subunit J. Its transcription is increased upon sulfur depletion.; NADH dehydrogenase subunit J (NDHJ); FUNCTIONS IN: NADH dehydrogenase (ubiquinone)…
Bin: 1.1.6	PS.lightreaction.NADH DH
	Id: seq_10236
	(at2g01590 : 111.0) Likely a subunit of the chloroplast NAD(P)H dehydrogenase complex, involved in PSI cyclic electron transport. Located in the membrane fraction of chloroplast. Mutant has impaired NAD(P)H dehydrogenase activity.; CHLORORESPIRATORY REDUCTION 3 (CRR3); FUNCTIONS IN: molecular_function unknown; INVOLVED IN: photosynthetic electron transport in photosystem I; LOCATED IN: chloroplas…
Bin: 1.1.6	PS.lightreaction.NADH DH
	Id: seq_11090
	(at4g37920 : 510.0) unknown protein; FUNCTIONS IN: molecular_function unknown; INVOLVED IN: biological_process unknown; LOCATED IN: chloroplast thylakoid membrane, chloroplast, chloroplast envelope; BEST Arabidopsis thaliana protein match is: unknown protein (TAIR:AT1G36320.1); Has 123 Blast hits to 120 proteins in 40 species: Archae - 2; Bacteria - 11; Metazoa - 8; Fungi - 0; Plants - 85; Viruse…
Bin: 1.1.6	PS.lightreaction.NADH DH
	Id: seq_15527
	(at4g37925 : 157.0) Encodes subunit NDH-M of NAD(P)H:plastoquinone dehydrogenase complex (Ndh complex) present in the thylakoid membrane of chloroplasts. This subunit is thought to be required for Ndh complex assembly.; subunit NDH-M of NAD(P)H:plastoquinone dehydrogenase complex (NDH-M); FUNCTIONS IN: oxidoreductase activity, acting on NADH or NADPH, quinone or similar compound as acceptor; INVO…
Bin: 1.1.6	PS.lightreaction.NADH DH
	Id: seq_27196
	(p06409|ndhk_tobac : 410.0) NAD(P)H-quinone oxidoreductase chain K, chloroplast (EC 1.6.5.-) (NAD(P)H dehydrogenase, chain K) (NADH-plastoquinone oxidoreductase subunit K) - Nicotiana tabacum (Common tobacco) & (atcg00430 : 391.0) Encodes a protein which was originally thought to be part of photosystem II but its wheat homolog was later shown to encode for subunit K of NADH dehydrogenase.; photos…
Bin: 1.1.6	PS.lightreaction.NADH DH
	Id: seq_31652
	(at2g01590 : 95.9) Likely a subunit of the chloroplast NAD(P)H dehydrogenase complex, involved in PSI cyclic electron transport. Located in the membrane fraction of chloroplast. Mutant has impaired NAD(P)H dehydrogenase activity.; CHLORORESPIRATORY REDUCTION 3 (CRR3); FUNCTIONS IN: molecular_function unknown; INVOLVED IN: photosynthetic electron transport in photosystem I; LOCATED IN: chloroplast…
Bin: 1.1.6	PS.lightreaction.NADH DH
	Id: seq_44123
	(at1g74880 : 80.1) Encodes subunit NDH-O of NAD(P)H:plastoquinone dehydrogenase complex (Ndh complex) present in the thylakoid membrane of chloroplasts. This subunit is thought to be required for Ndh complex assembly.; NAD(P)H:plastoquinone dehydrogenase complex subunit O (NDH-O); FUNCTIONS IN: oxidoreductase activity, acting on NADH or NADPH, quinone or similar compound as acceptor; INVOLVED IN:…
Bin: 1.1.6	PS.lightreaction.NADH DH
	Id: seq_45482
	(at5g58260 : 129.0) Encodes subunit NDH-N of NAD(P)H:plastoquinone dehydrogenase complex (Ndh complex) present in the thylakoid membrane of chloroplasts. This subunit is thought to be required for Ndh complex assembly.; oxidoreductases, acting on NADH or NADPH, quinone or similar compound as acceptor; FUNCTIONS IN: oxidoreductase activity, acting on NADH or NADPH, quinone or similar compound as a…
Bin: 1.1.6	PS.lightreaction.NADH DH
	Id: seq_59674
	(at4g37920 : 187.0) unknown protein; FUNCTIONS IN: molecular_function unknown; INVOLVED IN: biological_process unknown; LOCATED IN: chloroplast thylakoid membrane, chloroplast, chloroplast envelope; BEST Arabidopsis thaliana protein match is: unknown protein (TAIR:AT1G36320.1); Has 123 Blast hits to 120 proteins in 40 species: Archae - 2; Bacteria - 11; Metazoa - 8; Fungi - 0; Plants - 85; Viruse…
Bin: 1.1.6	PS.lightreaction.NADH DH
	Id: seq_65723
	(q32539|nu5c_lacsa : 140.0) NAD(P)H-quinone oxidoreductase chain 5, chloroplast (EC 1.6.5.-) (NAD(P)H dehydrogenase, chain 5) (NADH-plastoquinone oxidoreductase chain 5) - Lactuca sativa (Garden lettuce) & (atcg01010 : 123.0) Chloroplast encoded NADH dehydrogenase unit.; NDHF; FUNCTIONS IN: NADH dehydrogenase activity; INVOLVED IN: photosynthesis; LOCATED IN: chloroplast; EXPRESSED IN: 21 plant s…
Bin: 1.1.6	PS.lightreaction.NADH DH
	Id: seq_66887
	(q9bbp3|nu4c_lotja : 258.0) NAD(P)H-quinone oxidoreductase chain 4, chloroplast (EC 1.6.5.-) (NAD(P)H dehydrogenase, chain 4) (NADH-plastoquinone oxidoreductase chain 4) - Lotus japonicus & (atcg01050 : 254.0) Represents a plastid-encoded subunit of a NAD(P)H dehydrogenase complex. Its mRNA is edited at four positions. Translation data is not available for this gene.; NDHD; FUNCTIONS IN: oxidored…
Bin: 1.1.6	PS.lightreaction.NADH DH
	Id: seq_79932
	(p06262|nu4c_tobac : 309.0) NAD(P)H-quinone oxidoreductase chain 4, chloroplast (EC 1.6.5.-) (NAD(P)H dehydrogenase, chain 4) (NADH-plastoquinone oxidoreductase chain 4) - Nicotiana tabacum (Common tobacco) & (atcg01050 : 301.0) Represents a plastid-encoded subunit of a NAD(P)H dehydrogenase complex. Its mRNA is edited at four positions. Translation data is not available for this gene.; NDHD; FUN…
Bin: 1.1.6	PS.lightreaction.NADH DH
	Id: seq_81725
	(q32722|nu6c_tobac : 155.0) NAD(P)H-quinone oxidoreductase chain 6, chloroplast (EC 1.6.5.-) (NAD(P)H dehydrogenase, chain 6) (NADH-plastoquinone oxidoreductase chain 6) - Nicotiana tabacum (Common tobacco) & (atcg01080 : 147.0) NADH dehydrogenase ND6; NDHG; CONTAINS InterPro DOMAIN/s: NADH:ubiquinone/plastoquinone oxidoreductase, chain 6 (InterPro:IPR001457). & (reliability: 294.0) & (original d…
Bin: 1.1.6	PS.lightreaction.NADH DH
	Id: seq_85349
	(q9m3j0|nu4c_spiol : 178.0) NAD(P)H-quinone oxidoreductase chain 4, chloroplast (EC 1.6.5.-) (NAD(P)H dehydrogenase, chain 4) (NADH-plastoquinone oxidoreductase chain 4) - Spinacia oleracea (Spinach) & (atcg01050 : 174.0) Represents a plastid-encoded subunit of a NAD(P)H dehydrogenase complex. Its mRNA is edited at four positions. Translation data is not available for this gene.; NDHD; FUNCTIONS …
Bin: 1.1.6	PS.lightreaction.NADH DH
	Id: seq_107955
	(q8s8v0|nu5c_atrbe : 98.6) NAD(P)H-quinone oxidoreductase chain 5, chloroplast (EC 1.6.5.-) (NAD(P)H dehydrogenase, chain 5) (NADH-plastoquinone oxidoreductase chain 5) - Atropa belladonna (Belladonna) (Deadly nightshade) & (atcg01010 : 90.5) Chloroplast encoded NADH dehydrogenase unit.; NDHF; FUNCTIONS IN: NADH dehydrogenase activity; INVOLVED IN: photosynthesis; LOCATED IN: chloroplast; EXPRESS…
Bin: 1.1.5.4	PS.lightreaction.other electron carrier (ox/red).ferredoxin oxireductase
	Id: seq_9444
	(at1g15140 : 401.0) FAD/NAD(P)-binding oxidoreductase; FUNCTIONS IN: oxidoreductase activity, copper ion binding; INVOLVED IN: oxidation reduction; LOCATED IN: thylakoid, chloroplast; EXPRESSED IN: 23 plant structures; EXPRESSED DURING: 15 growth stages; CONTAINS InterPro DOMAIN/s: Oxidoreductase FAD/NAD(P)-binding (InterPro:IPR001433), Ferredoxin reductase-type FAD-binding domain (InterPro:IPR01…
Bin: 1.1.5.4	PS.lightreaction.other electron carrier (ox/red).ferredoxin oxireductase
	Id: seq_13391
	(at3g09150 : 261.0) Required for biosynthesis of the tetrapyrrole phytochrome chromophore phytochromobilin. Encodes phytochromobilin synthase, a ferredoxin-dependent biliverdin reductase. It is necessary for coupling the expression of some nuclear genes to the functional state of the chloroplast.; ELONGATED HYPOCOTYL 2 (HY2); CONTAINS InterPro DOMAIN/s: Ferredoxin-dependent bilin reductase (Inter…
Bin: 1.1.5.4	PS.lightreaction.other electron carrier (ox/red).ferredoxin oxireductase
	Id: seq_63793
	(at3g09150 : 131.0) Required for biosynthesis of the tetrapyrrole phytochrome chromophore phytochromobilin. Encodes phytochromobilin synthase, a ferredoxin-dependent biliverdin reductase. It is necessary for coupling the expression of some nuclear genes to the functional state of the chloroplast.; ELONGATED HYPOCOTYL 2 (HY2); CONTAINS InterPro DOMAIN/s: Ferredoxin-dependent bilin reductase (Inter…
Bin: 1.1.5.4	PS.lightreaction.other electron carrier (ox/red).ferredoxin oxireductase
	Id: seq_65920
	(at1g15140 : 115.0) FAD/NAD(P)-binding oxidoreductase; FUNCTIONS IN: oxidoreductase activity, copper ion binding; INVOLVED IN: oxidation reduction; LOCATED IN: thylakoid, chloroplast; EXPRESSED IN: 23 plant structures; EXPRESSED DURING: 15 growth stages; CONTAINS InterPro DOMAIN/s: Oxidoreductase FAD/NAD(P)-binding (InterPro:IPR001433), Ferredoxin reductase-type FAD-binding domain (InterPro:IPR01…
Bin: 1.1.5.4	PS.lightreaction.other electron carrier (ox/red).ferredoxin oxireductase
	Id: seq_73440
	(at3g09150 : 90.9) Required for biosynthesis of the tetrapyrrole phytochrome chromophore phytochromobilin. Encodes phytochromobilin synthase, a ferredoxin-dependent biliverdin reductase. It is necessary for coupling the expression of some nuclear genes to the functional state of the chloroplast.; ELONGATED HYPOCOTYL 2 (HY2); CONTAINS InterPro DOMAIN/s: Ferredoxin-dependent bilin reductase (InterP…
Bin: 1.1.5.3	PS.lightreaction.other electron carrier (ox/red).ferredoxin reductase
	Id: seq_1479
	(p10933|fenr1_pea : 619.0) Ferredoxin--NADP reductase, leaf isozyme, chloroplast precursor (EC 1.18.1.2) (FNR) - Pisum sativum (Garden pea) & (at5g66190 : 603.0) Encodes a leaf-type ferredoxin:NADP(H) oxidoreductase. It is present in both chloroplast stroma and thylakoid membranes but is more abundant in the thylakoid. The affinity of this enzyme for ferredoxin is slightly, but significantly, hig…
Bin: 1.1.5.3	PS.lightreaction.other electron carrier (ox/red).ferredoxin reductase
	Id: seq_2397
	(at4g32360 : 310.0) Pyridine nucleotide-disulphide oxidoreductase family protein; FUNCTIONS IN: electron carrier activity, binding, catalytic activity; INVOLVED IN: metabolic process; LOCATED IN: plasma membrane; EXPRESSED IN: 22 plant structures; EXPRESSED DURING: 13 growth stages; CONTAINS InterPro DOMAIN/s: FAD-dependent pyridine nucleotide-disulphide oxidoreductase (InterPro:IPR013027), Adren…
Bin: 1.1.5.3	PS.lightreaction.other electron carrier (ox/red).ferredoxin reductase
	Id: seq_8043
	(p10933|fenr1_pea : 593.0) Ferredoxin--NADP reductase, leaf isozyme, chloroplast precursor (EC 1.18.1.2) (FNR) - Pisum sativum (Garden pea) & (at1g20020 : 590.0) Encodes a leaf-type ferredoxin:NADP(H) oxidoreductase. It is present in both chloroplast stroma and thylakoid membranes but is more abundant in the stroma; LEAF FNR 2 (ATLFNR2); FUNCTIONS IN: oxidoreductase activity, poly(U) RNA binding,…
Bin: 1.1.5.3	PS.lightreaction.other electron carrier (ox/red).ferredoxin reductase
	Id: seq_18229
	(p41343|fenr_mescr : 138.0) Ferredoxin--NADP reductase, chloroplast precursor (EC 1.18.1.2) (FNR) - Mesembryanthemum crystallinum (Common ice plant) & (at5g66190 : 132.0) Encodes a leaf-type ferredoxin:NADP(H) oxidoreductase. It is present in both chloroplast stroma and thylakoid membranes but is more abundant in the thylakoid. The affinity of this enzyme for ferredoxin is slightly, but significa…
Bin: 1.1.5.3	PS.lightreaction.other electron carrier (ox/red).ferredoxin reductase
	Id: seq_18300
	(p10933|fenr1_pea : 196.0) Ferredoxin--NADP reductase, leaf isozyme, chloroplast precursor (EC 1.18.1.2) (FNR) - Pisum sativum (Garden pea) & (at5g66190 : 193.0) Encodes a leaf-type ferredoxin:NADP(H) oxidoreductase. It is present in both chloroplast stroma and thylakoid membranes but is more abundant in the thylakoid. The affinity of this enzyme for ferredoxin is slightly, but significantly, hig…
Bin: 1.1.5.3	PS.lightreaction.other electron carrier (ox/red).ferredoxin reductase
	Id: seq_25871
	(p41346|fenr_vicfa : 152.0) Ferredoxin--NADP reductase, chloroplast precursor (EC 1.18.1.2) (FNR) - Vicia faba (Broad bean) & (at1g20020 : 150.0) Encodes a leaf-type ferredoxin:NADP(H) oxidoreductase. It is present in both chloroplast stroma and thylakoid membranes but is more abundant in the stroma; LEAF FNR 2 (ATLFNR2); FUNCTIONS IN: oxidoreductase activity, poly(U) RNA binding, NADPH dehydroge…
Bin: 1.1.5.3	PS.lightreaction.other electron carrier (ox/red).ferredoxin reductase
	Id: seq_33448
	(at4g32360 : 255.0) Pyridine nucleotide-disulphide oxidoreductase family protein; FUNCTIONS IN: electron carrier activity, binding, catalytic activity; INVOLVED IN: metabolic process; LOCATED IN: plasma membrane; EXPRESSED IN: 22 plant structures; EXPRESSED DURING: 13 growth stages; CONTAINS InterPro DOMAIN/s: FAD-dependent pyridine nucleotide-disulphide oxidoreductase (InterPro:IPR013027), Adren…
Bin: 1.1.5.3	PS.lightreaction.other electron carrier (ox/red).ferredoxin reductase
	Id: seq_45546
	(at4g32360 : 307.0) Pyridine nucleotide-disulphide oxidoreductase family protein; FUNCTIONS IN: electron carrier activity, binding, catalytic activity; INVOLVED IN: metabolic process; LOCATED IN: plasma membrane; EXPRESSED IN: 22 plant structures; EXPRESSED DURING: 13 growth stages; CONTAINS InterPro DOMAIN/s: FAD-dependent pyridine nucleotide-disulphide oxidoreductase (InterPro:IPR013027), Adren…
Bin: 1.1.5.3	PS.lightreaction.other electron carrier (ox/red).ferredoxin reductase
	Id: seq_59721
	(p10933|fenr1_pea : 95.9) Ferredoxin--NADP reductase, leaf isozyme, chloroplast precursor (EC 1.18.1.2) (FNR) - Pisum sativum (Garden pea) & (at5g66190 : 94.7) Encodes a leaf-type ferredoxin:NADP(H) oxidoreductase. It is present in both chloroplast stroma and thylakoid membranes but is more abundant in the thylakoid. The affinity of this enzyme for ferredoxin is slightly, but significantly, highe…
Bin: 1.1.5.3	PS.lightreaction.other electron carrier (ox/red).ferredoxin reductase
	Id: seq_84017
	(at4g32360 : 116.0) Pyridine nucleotide-disulphide oxidoreductase family protein; FUNCTIONS IN: electron carrier activity, binding, catalytic activity; INVOLVED IN: metabolic process; LOCATED IN: plasma membrane; EXPRESSED IN: 22 plant structures; EXPRESSED DURING: 13 growth stages; CONTAINS InterPro DOMAIN/s: FAD-dependent pyridine nucleotide-disulphide oxidoreductase (InterPro:IPR013027), Adren…
Bin: 1.1.5.2	PS.lightreaction.other electron carrier (ox/red).ferredoxin
	Id: seq_78
	(q9zts2|fer_capan : 220.0) Ferredoxin, chloroplast precursor (PFLP) - Capsicum annuum (Bell pepper) & (at1g60950 : 194.0) encodes a major leaf ferredoxin; FED A; FUNCTIONS IN: electron carrier activity, iron-sulfur cluster binding, 2 iron, 2 sulfur cluster binding; INVOLVED IN: photosynthetic electron transport chain, response to light stimulus; LOCATED IN: chloroplast stroma, chloroplast; EXPRES…
Bin: 1.1.5.2	PS.lightreaction.other electron carrier (ox/red).ferredoxin
	Id: seq_4586
	(at3g16250 : 213.0) encodes a novel subunit of the chloroplast NAD(P)H dehydrogenase complex, involved in cyclic electron flow around photosystem I to produce ATP. Contains a 4Fe-4S cluster.; NDH-dependent cyclic electron flow 1 (NDF4); FUNCTIONS IN: electron carrier activity, iron-sulfur cluster binding; INVOLVED IN: photosynthetic electron transport in photosystem I; LOCATED IN: chloroplast thy…
Bin: 1.1.5.2	PS.lightreaction.other electron carrier (ox/red).ferredoxin
	Id: seq_12449
	(at1g02180 : 139.0) ferredoxin-related; FUNCTIONS IN: molecular_function unknown; INVOLVED IN: biological_process unknown; LOCATED IN: endomembrane system; EXPRESSED IN: 23 plant structures; EXPRESSED DURING: 15 growth stages; Has 54 Blast hits to 54 proteins in 11 species: Archae - 0; Bacteria - 0; Metazoa - 0; Fungi - 0; Plants - 54; Viruses - 0; Other Eukaryotes - 0 (source: NCBI BLink). & (re…
Bin: 1.1.5.2	PS.lightreaction.other electron carrier (ox/red).ferredoxin
	Id: seq_19199
	(at4g32590 : 221.0) 2Fe-2S ferredoxin-like superfamily protein; FUNCTIONS IN: electron carrier activity, iron-sulfur cluster binding; LOCATED IN: chloroplast; EXPRESSED IN: 21 plant structures; EXPRESSED DURING: 15 growth stages; CONTAINS InterPro DOMAIN/s: Ferredoxin (InterPro:IPR001041); BEST Arabidopsis thaliana protein match is: NDH-dependent cyclic electron flow 1 (TAIR:AT3G16250.1); Has 353…
Bin: 1.1.5.2	PS.lightreaction.other electron carrier (ox/red).ferredoxin
	Id: seq_21063
	(p09911|fer1_pea : 139.0) Ferredoxin-1, chloroplast precursor (Ferredoxin I) - Pisum sativum (Garden pea) & (at1g10960 : 120.0) ferredoxin 1 (FD1); FUNCTIONS IN: electron carrier activity, iron-sulfur cluster binding, 2 iron, 2 sulfur cluster binding; INVOLVED IN: response to karrikin; LOCATED IN: chloroplast stroma, chloroplast; EXPRESSED IN: 22 plant structures; EXPRESSED DURING: 13 growth stag…
Bin: 1.1.5.2	PS.lightreaction.other electron carrier (ox/red).ferredoxin
	Id: seq_33397
	(at1g02180 : 227.0) ferredoxin-related; FUNCTIONS IN: molecular_function unknown; INVOLVED IN: biological_process unknown; LOCATED IN: endomembrane system; EXPRESSED IN: 23 plant structures; EXPRESSED DURING: 15 growth stages; Has 54 Blast hits to 54 proteins in 11 species: Archae - 0; Bacteria - 0; Metazoa - 0; Fungi - 0; Plants - 54; Viruses - 0; Other Eukaryotes - 0 (source: NCBI BLink). & (re…
Bin: 1.1.5.2	PS.lightreaction.other electron carrier (ox/red).ferredoxin
	Id: seq_42912
	(at3g16250 : 101.0) encodes a novel subunit of the chloroplast NAD(P)H dehydrogenase complex, involved in cyclic electron flow around photosystem I to produce ATP. Contains a 4Fe-4S cluster.; NDH-dependent cyclic electron flow 1 (NDF4); FUNCTIONS IN: electron carrier activity, iron-sulfur cluster binding; INVOLVED IN: photosynthetic electron transport in photosystem I; LOCATED IN: chloroplast thy…
Bin: 1.1.5.2	PS.lightreaction.other electron carrier (ox/red).ferredoxin
	Id: seq_43082
	(at4g32590 : 81.6) 2Fe-2S ferredoxin-like superfamily protein; FUNCTIONS IN: electron carrier activity, iron-sulfur cluster binding; LOCATED IN: chloroplast; EXPRESSED IN: 21 plant structures; EXPRESSED DURING: 15 growth stages; CONTAINS InterPro DOMAIN/s: Ferredoxin (InterPro:IPR001041); BEST Arabidopsis thaliana protein match is: NDH-dependent cyclic electron flow 1 (TAIR:AT3G16250.1); Has 3533…
Bin: 1.1.5.2	PS.lightreaction.other electron carrier (ox/red).ferredoxin
	Id: seq_54753
	(at5g07950 : 205.0) unknown protein; FUNCTIONS IN: molecular_function unknown; INVOLVED IN: biological_process unknown; LOCATED IN: chloroplast; EXPRESSED IN: 20 plant structures; EXPRESSED DURING: 9 growth stages; Has 30201 Blast hits to 17322 proteins in 780 species: Archae - 12; Bacteria - 1396; Metazoa - 17338; Fungi - 3422; Plants - 5037; Viruses - 0; Other Eukaryotes - 2996 (source: NCBI BL…
Bin: 1.1.5.2	PS.lightreaction.other electron carrier (ox/red).ferredoxin
	Id: seq_63405
	(at5g07950 : 91.7) unknown protein; FUNCTIONS IN: molecular_function unknown; INVOLVED IN: biological_process unknown; LOCATED IN: chloroplast; EXPRESSED IN: 20 plant structures; EXPRESSED DURING: 9 growth stages; Has 30201 Blast hits to 17322 proteins in 780 species: Archae - 12; Bacteria - 1396; Metazoa - 17338; Fungi - 3422; Plants - 5037; Viruses - 0; Other Eukaryotes - 2996 (source: NCBI BLi…
Bin: 1.1.5.2	PS.lightreaction.other electron carrier (ox/red).ferredoxin
	Id: seq_73368
	(at1g02180 : 124.0) ferredoxin-related; FUNCTIONS IN: molecular_function unknown; INVOLVED IN: biological_process unknown; LOCATED IN: endomembrane system; EXPRESSED IN: 23 plant structures; EXPRESSED DURING: 15 growth stages; Has 54 Blast hits to 54 proteins in 11 species: Archae - 0; Bacteria - 0; Metazoa - 0; Fungi - 0; Plants - 54; Viruses - 0; Other Eukaryotes - 0 (source: NCBI BLink). & (re…
Bin: 1.1.5	PS.lightreaction.other electron carrier (ox/red)
	Id: seq_26160
	(at5g45040 : 226.0) Cytochrome c; FUNCTIONS IN: electron carrier activity, iron ion binding, heme binding; EXPRESSED IN: 21 plant structures; EXPRESSED DURING: 13 growth stages; CONTAINS InterPro DOMAIN/s: Cytochrome c, class I (InterPro:IPR003088), Cytochrome c domain (InterPro:IPR009056); Has 30201 Blast hits to 17322 proteins in 780 species: Archae - 12; Bacteria - 1396; Metazoa - 17338; Fungi…
Bin: 1.1.4.9	PS.lightreaction.ATP synthase.subunit B_ (ATPX)
	Id: seq_1265
	(p31853|atpx_spiol : 213.0) ATP synthase B' chain, chloroplast precursor (EC 3.6.3.14) (Subunit II) - Spinacia oleracea (Spinach) & (at4g32260 : 204.0) ATPase, F0 complex, subunit B/B', bacterial/chloroplast; FUNCTIONS IN: hydrogen ion transmembrane transporter activity; INVOLVED IN: defense response to bacterium; LOCATED IN: thylakoid, chloroplast thylakoid membrane, chloroplast, membrane, chlor…
Bin: 1.1.4.8	PS.lightreaction.ATP synthase.subunit B (ATPF)
	Id: seq_55333
	(p06290|atpf_tobac : 89.7) ATP synthase B chain (EC 3.6.3.14) (ATPase subunit I) - Nicotiana tabacum (Common tobacco) & (atcg00130 : 83.2) ATPase F subunit.; ATPF; FUNCTIONS IN: hydrogen ion transporting ATP synthase activity, rotational mechanism; INVOLVED IN: cellular respiration, mitochondrial ATP synthesis coupled proton transport; LOCATED IN: proton-transporting ATP synthase complex, thylako…
Bin: 1.1.4.7	PS.lightreaction.ATP synthase.delta chain
	Id: seq_1688
	(p32980|atpd_tobac : 256.0) ATP synthase delta chain, chloroplast precursor (EC 3.6.3.14) - Nicotiana tabacum (Common tobacco) & (at4g09650: 236.0) Encodes the chloroplast ATPase delta-subunit.; ATP synthase delta-subunit gene (ATPD); FUNCTIONS IN: hydrogen ion transporting ATP synthase activity, rotational mechanism; INVOLVED IN: response to cold, defense response to bacterium, photosynthetic el…
Bin: 1.1.4.7	PS.lightreaction.ATP synthase.delta chain
	Id: seq_5668
	(p11402|atpd_spiol : 102.0) ATP synthase delta chain, chloroplast precursor (EC 3.6.3.14) - Spinacia oleracea (Spinach) & (at4g09650 : 101.0) Encodes the chloroplast ATPase delta-subunit.; ATP synthase delta-subunit gene (ATPD); FUNCTIONS IN: hydrogen ion transporting ATP synthase activity, rotational mechanism; INVOLVED IN: response to cold, defense response to bacterium, photosynthetic electron…
Bin: 1.1.4.7	PS.lightreaction.ATP synthase.delta chain
	Id: seq_9150
	(p32980|atpd_tobac : 137.0) ATP synthase delta chain, chloroplast precursor (EC 3.6.3.14) - Nicotiana tabacum (Common tobacco) & (at4g09650: 127.0) Encodes the chloroplast ATPase delta-subunit.; ATP synthase delta-subunit gene (ATPD); FUNCTIONS IN: hydrogen ion transporting ATP synthase activity, rotational mechanism; INVOLVED IN: response to cold, defense response to bacterium, photosynthetic el…
Bin: 1.1.4.5	PS.lightreaction.ATP synthase.subunit C
	Id: seq_3408
	(p06286|atph_tobac : 115.0) ATP synthase C chain (EC 3.6.3.14) (Lipid-binding protein) (ATPase subunit III) - Nicotiana tabacum (Common tobacco) & (atcg00140 : 114.0) ATPase III subunit; ATPH; FUNCTIONS IN: hydrogen ion transmembrane transporter activity; INVOLVED IN: ATP synthesis coupled proton transport; LOCATED IN: chloroplast thylakoid membrane; EXPRESSED IN: 23 plant structures; EXPRESSED D…
Bin: 1.1.4.4	PS.lightreaction.ATP synthase.gamma chain
	Id: seq_1390
	(p29790|atpg_tobac : 528.0) ATP synthase gamma chain, chloroplast precursor (EC 3.6.3.14) - Nicotiana tabacum (Common tobacco) & (at4g04640 : 514.0) One of two genes (with ATPC2) encoding the gamma subunit of Arabidopsis chloroplast ATP synthase.; ATPC1; FUNCTIONS IN: enzyme regulator activity; INVOLVED IN: photosynthetic electron transport in photosystem II, ATP synthesis coupled proton transpor…
Bin: 1.1.4.4	PS.lightreaction.ATP synthase.gamma chain
	Id: seq_19653
	(p29790|atpg_tobac : 392.0) ATP synthase gamma chain, chloroplast precursor (EC 3.6.3.14) - Nicotiana tabacum (Common tobacco) & (at4g04640 : 382.0) One of two genes (with ATPC2) encoding the gamma subunit of Arabidopsis chloroplast ATP synthase.; ATPC1; FUNCTIONS IN: enzyme regulator activity; INVOLVED IN: photosynthetic electron transport in photosystem II, ATP synthesis coupled proton transpor…
Bin: 1.1.4.4	PS.lightreaction.ATP synthase.gamma chain
	Id: seq_49284
	(at1g15700 : 112.0) One of two genes that encode the gamma subunit of Arabidopsis chloroplast ATP synthase. It is thought to be involved in the regulation of the ATP synthase activity.; ATPC2; FUNCTIONS IN: enzyme regulator activity; INVOLVED IN: ATP synthesis coupled proton transport; LOCATED IN: chloroplast ATP synthase complex, chloroplast; EXPRESSED IN: 22 plant structures; EXPRESSED DURING: …
Bin: 1.1.4.4	PS.lightreaction.ATP synthase.gamma chain
	Id: seq_58781
	(p29790|atpg_tobac : 178.0) ATP synthase gamma chain, chloroplast precursor (EC 3.6.3.14) - Nicotiana tabacum (Common tobacco) & (at4g04640 : 174.0) One of two genes (with ATPC2) encoding the gamma subunit of Arabidopsis chloroplast ATP synthase.; ATPC1; FUNCTIONS IN: enzyme regulator activity; INVOLVED IN: photosynthetic electron transport in photosystem II, ATP synthesis coupled proton transpor…
Bin: 1.1.4.2	PS.lightreaction.ATP synthase.beta subunit
	Id: seq_88603
	(p00825|atpb_spiol : 206.0) ATP synthase subunit beta (EC 3.6.3.14) (ATPase subunit beta) (ATP synthase F1 sector subunit beta) - Spinacia oleracea (Spinach) & (atcg00480 : 205.0) chloroplast-encoded gene for beta subunit of ATP synthase; ATP synthase subunit beta (PB); FUNCTIONS IN: hydrogen ion transmembrane transporter activity, zinc ion binding; INVOLVED IN: defense response to fungus, incomp…
Bin: 1.1.4.1	PS.lightreaction.ATP synthase.alpha subunit
	Id: seq_27689
	(q8s8y3|atpa_atrbe : 869.0) ATP synthase subunit alpha (EC 3.6.3.14) (ATPase subunit alpha) (ATP synthase F1 sector subunit alpha) - Atropa belladonna (Belladonna) (Deadly nightshade) & (atcg00120 : 858.0) Encodes the ATPase alpha subunit, which is a subunit of ATP synthase and part of the CF1 portion which catalyzes the conversion of ADP to ATP using the proton motive force. This complex is loca…
Bin: 1.1.4	PS.lightreaction.ATP synthase
	Id: seq_1824
	(at2g31040 : 454.0) ATP synthase protein I -related; LOCATED IN: chloroplast; EXPRESSED IN: 22 plant structures; EXPRESSED DURING: 13 growth stages; Has 182 Blast hits to 182 proteins in 74 species: Archae - 0; Bacteria - 104; Metazoa - 0; Fungi - 0; Plants - 50; Viruses - 2; Other Eukaryotes - 26 (source: NCBI BLink). & (reliability: 908.0) & (original description: no original description)
Bin: 1.1.4	PS.lightreaction.ATP synthase
	Id: seq_11481
	(at2g31040 : 118.0) ATP synthase protein I -related; LOCATED IN: chloroplast; EXPRESSED IN: 22 plant structures; EXPRESSED DURING: 13 growth stages; Has 182 Blast hits to 182 proteins in 74 species: Archae - 0; Bacteria - 104; Metazoa - 0; Fungi - 0; Plants - 50; Viruses - 2; Other Eukaryotes - 26 (source: NCBI BLink). & (reliability: 236.0) & (original description: no original description)
Bin: 1.1.4	PS.lightreaction.ATP synthase
	Id: seq_32029
	(at2g31040 : 135.0) ATP synthase protein I -related; LOCATED IN: chloroplast; EXPRESSED IN: 22 plant structures; EXPRESSED DURING: 13 growth stages; Has 182 Blast hits to 182 proteins in 74 species: Archae - 0; Bacteria - 104; Metazoa - 0; Fungi - 0; Plants - 50; Viruses - 2; Other Eukaryotes - 26 (source: NCBI BLink). & (reliability: 270.0) & (original description: no original description)
Bin: 1.1.4	PS.lightreaction.ATP synthase
	Id: seq_49255
	(at2g31040 : 130.0) ATP synthase protein I -related; LOCATED IN: chloroplast; EXPRESSED IN: 22 plant structures; EXPRESSED DURING: 13 growth stages; Has 182 Blast hits to 182 proteins in 74 species: Archae - 0; Bacteria - 104; Metazoa - 0; Fungi - 0; Plants - 50; Viruses - 2; Other Eukaryotes - 26 (source: NCBI BLink). & (reliability: 260.0) & (original description: no original description)
Bin: 1.1.3.4	PS.lightreaction.cytochrome b6/f.apocytochrome f (CYF)
	Id: seq_100646
	(p16013|cyf_spiol : 187.0) Apocytochrome f precursor - Spinacia oleracea (Spinach) & (atcg00540 : 181.0) Encodes cytochrome f apoprotein; involved in photosynthetic electron transport chain; encoded by the chloroplast genome and is transcriptionally repressed by a nuclear gene HCF2.; photosynthetic electron transfer A (PETA); FUNCTIONS IN: electron transporter, transferring electrons within cytoc…
Bin: 1.1.3.3	PS.lightreaction.cytochrome b6/f.cytochrome b6 (CYB6)
	Id: seq_42963
	(p05642|cyb6_maize : 432.0) Cytochrome b6 - Zea mays (Maize) & (atcg00720 : 431.0) Encodes the cytochrome b(6) subunit of the cytochrome b6f complex.; photosynthetic electron transfer B (PETB); FUNCTIONS IN: heme binding; INVOLVED IN: photosynthesis, light reaction; LOCATED IN: thylakoid, chloroplast thylakoid membrane, cytochrome b6f complex, chloroplast, membrane; EXPRESSED IN: 25 plant structu…
Bin: 1.1.3	PS.lightreaction.cytochrome b6/f
	Id: seq_46
	(p26291|ucria_pea : 335.0) Cytochrome b6-f complex iron-sulfur subunit, chloroplast precursor (EC 1.10.99.1) (Rieske iron-sulfur protein) (Plastohydroquinone:plastocyanin oxidoreductase iron-sulfur protein) (ISP) (RISP) - Pisum sativum (Garden pea) & (at4g03280 : 311.0) Encodes the Rieske FeS center of cytochrome b6f complex. Gene is expressed in shoot but not in root. Mutant has reduced electron…
Bin: 1.1.3	PS.lightreaction.cytochrome b6/f
	Id: seq_1436
	(at2g26500 : 115.0) cytochrome b6f complex subunit (petM), putative; Has 37 Blast hits to 37 proteins in 10 species: Archae - 0; Bacteria - 0; Metazoa - 0; Fungi - 0; Plants - 37; Viruses - 0; Other Eukaryotes - 0 (source: NCBI BLink). & (reliability: 230.0) & (original description: no original description)
Bin: 1.1.3	PS.lightreaction.cytochrome b6/f
	Id: seq_21150
	(at2g26500 : 114.0) cytochrome b6f complex subunit (petM), putative; Has 37 Blast hits to 37 proteins in 10 species: Archae - 0; Bacteria - 0; Metazoa - 0; Fungi - 0; Plants - 37; Viruses - 0; Other Eukaryotes - 0 (source: NCBI BLink). & (reliability: 228.0) & (original description: no original description)
Bin: 1.1.3	PS.lightreaction.cytochrome b6/f
	Id: seq_21938
	(at5g36120 : 160.0) "cofactor assembly, complex C (B6F)" (CCB3); FUNCTIONS IN: molecular_function unknown; INVOLVED IN: cytochrome b6f complex assembly; LOCATED IN: chloroplast thylakoid membrane, chloroplast; CONTAINS InterPro DOMAIN/s: Protein of unknown function YGGT (InterPro:IPR003425); Has 30201 Blast hits to 17322 proteins in 780 species: Archae - 12; Bacteria - 1396; Metazoa - 17338; Fung…
Bin: 1.1.3	PS.lightreaction.cytochrome b6/f
	Id: seq_24704
	(at4g03280 : 132.0) Encodes the Rieske FeS center of cytochrome b6f complex. Gene is expressed in shoot but not in root. Mutant has reduced electron transport at saturating light intensities and Q-cycle activity is hypersensitive to acidification of the thylakoid lumen.; photosynthetic electron transfer C (PETC); FUNCTIONS IN: electron transporter, transferring electrons from cytochrome b6/f comp…
Bin: 1.1.3	PS.lightreaction.cytochrome b6/f
	Id: seq_99128
	(at5g36120 : 93.2) "cofactor assembly, complex C (B6F)" (CCB3); FUNCTIONS IN: molecular_function unknown; INVOLVED IN: cytochrome b6f complex assembly; LOCATED IN: chloroplast thylakoid membrane, chloroplast; CONTAINS InterPro DOMAIN/s: Protein of unknown function YGGT (InterPro:IPR003425); Has 30201 Blast hits to 17322 proteins in 780 species: Archae - 12; Bacteria - 1396; Metazoa - 17338; Fungi…
Bin: 1.1.2.2	PS.lightreaction.photosystem I.PSI polypeptide subunits
	Id: seq_14
	(at1g31330 : 289.0) Encodes subunit F of photosystem I.; photosystem I subunit F (PSAF); FUNCTIONS IN: molecular_function unknown; INVOLVED IN: photosynthesis; LOCATED IN: in 7 components; EXPRESSED IN: 25 plant structures; EXPRESSED DURING: 14 growth stages; CONTAINS InterPro DOMAIN/s: Photosystem I reaction centre protein PsaF, subunit III (InterPro:IPR003666); Has 387 Blast hits to 387 protein…
Bin: 1.1.2.2	PS.lightreaction.photosystem I.PSI polypeptide subunits
	Id: seq_43
	(q39654|psal_cucsa : 276.0) Photosystem I reaction center subunit XI, chloroplast precursor (PSI-L) (PSI subunit V) - Cucumis sativus (Cucumber) & (at4g12800 : 267.0) Encodes subunit L of photosystem I reaction center.; photosystem I subunit l (PSAL); FUNCTIONS IN: molecular_function unknown; INVOLVED IN: photosynthesis, light reaction, photosynthesis; LOCATED IN: in 7 components; EXPRESSED IN: 2…
Bin: 1.1.2.2	PS.lightreaction.photosystem I.PSI polypeptide subunits
	Id: seq_211
	(p29302|psad_nicsy : 268.0) Photosystem I reaction center subunit II, chloroplast precursor (Photosystem I 20 kDa subunit) (PSI-D) - Nicotiana sylvestris (Wood tobacco) & (at1g03130 : 258.0) Encodes a protein predicted by sequence similarity with spinach PsaD to be photosystem I reaction center subunit II (PsaD2); photosystem I subunit D-2 (PSAD-2); FUNCTIONS IN: molecular_function unknown; INVOL…
Bin: 1.1.2.2	PS.lightreaction.photosystem I.PSI polypeptide subunits
	Id: seq_307
	(at1g55670 : 195.0) Encodes subunit G of photosystem I, an 11-kDa membrane protein that plays an important role in electron transport between plastocyanin and PSI and is involved in the stability of the PSI complex. PSI-G subunit is bound to PSI-B and is in contact with Lhca1. The protein inserts into thylakoids by a direct or "spontaneous" pathway that does not involve the activities of any know…
Bin: 1.1.2.2	PS.lightreaction.photosystem I.PSI polypeptide subunits
	Id: seq_325
	(at1g08380 : 211.0) Encodes subunit O of photosystem I.; photosystem I subunit O (PSAO); FUNCTIONS IN: molecular_function unknown; INVOLVED IN: response to salt stress, photosynthesis, light harvesting in photosystem I; LOCATED IN: thylakoid, photosystem I, chloroplast; EXPRESSED IN: 21 plant structures; EXPRESSED DURING: 13 growth stages; CONTAINS InterPro DOMAIN/s: Photosystem I PsaO (InterPro:…
Bin: 1.1.2.2	PS.lightreaction.photosystem I.PSI polypeptide subunits
	Id: seq_369
	(at1g52230 : 184.0) photosystem I subunit H2 (PSAH2); FUNCTIONS IN: molecular_function unknown; INVOLVED IN: photosynthesis; LOCATED IN: in 6 components; EXPRESSED IN: 21 plant structures; EXPRESSED DURING: 13 growth stages; CONTAINS InterPro DOMAIN/s: Photosystem I reaction centre subunit VI (InterPro:IPR004928); BEST Arabidopsis thaliana protein match is: photosystem I subunit H-1 (TAIR:AT3G161…
Bin: 1.1.2.2	PS.lightreaction.photosystem I.PSI polypeptide subunits
	Id: seq_492
	(at5g64040 : 194.0) Encodes the only subunit of photosystem I located entirely in the thylakoid lumen. May be involved in the interaction between plastocyanin and the photosystem I complex.; PSAN; FUNCTIONS IN: calmodulin binding; INVOLVED IN: photosynthetic electron transport in photosystem I; LOCATED IN: chloroplast thylakoid membrane, photosystem I, chloroplast thylakoid lumen, chloroplast, ch…
Bin: 1.1.2.2	PS.lightreaction.photosystem I.PSI polypeptide subunits
	Id: seq_1482
	(q41228|psaea_nicsy : 100.0) Photosystem I reaction center subunit IV A, chloroplast precursor (PSI-E A) [Contains: Photosystem I reaction center subunit IV A isoform 2] - Nicotiana sylvestris (Wood tobacco) & (at2g20260 : 95.1) Encodes subunit E of photosystem I.; photosystem I subunit E-2 (PSAE-2); FUNCTIONS IN: catalytic activity; INVOLVED IN: photosynthesis; LOCATED IN: thylakoid, chloroplast…
Bin: 1.1.2.2	PS.lightreaction.photosystem I.PSI polypeptide subunits
	Id: seq_2167
	(at1g30380 : 197.0) Encodes subunit K of photosystem I reaction center.; photosystem I subunit K (PSAK); FUNCTIONS IN: molecular_function unknown; INVOLVED IN: photosynthesis; LOCATED IN: thylakoid, chloroplast thylakoid membrane, photosystem I, chloroplast, membrane; EXPRESSED IN: 23 plant structures; EXPRESSED DURING: 13 growth stages; CONTAINS InterPro DOMAIN/s: Photosystem I PsaG/PsaK protein…
Bin: 1.1.2.2	PS.lightreaction.photosystem I.PSI polypeptide subunits
	Id: seq_2311
	(q41228|psaea_nicsy : 114.0) Photosystem I reaction center subunit IV A, chloroplast precursor (PSI-E A) [Contains: Photosystem I reaction center subunit IV A isoform 2] - Nicotiana sylvestris (Wood tobacco) & (at2g20260 : 101.0) Encodes subunit E of photosystem I.; photosystem I subunit E-2 (PSAE-2); FUNCTIONS IN: catalytic activity; INVOLVED IN: photosynthesis; LOCATED IN: thylakoid, chloroplas…
Bin: 1.1.2.2	PS.lightreaction.photosystem I.PSI polypeptide subunits
	Id: seq_2406
	(at1g52230 : 184.0) photosystem I subunit H2 (PSAH2); FUNCTIONS IN: molecular_function unknown; INVOLVED IN: photosynthesis; LOCATED IN: in 6 components; EXPRESSED IN: 21 plant structures; EXPRESSED DURING: 13 growth stages; CONTAINS InterPro DOMAIN/s: Photosystem I reaction centre subunit VI (InterPro:IPR004928); BEST Arabidopsis thaliana protein match is: photosystem I subunit H-1 (TAIR:AT3G161…
Bin: 1.1.2.2	PS.lightreaction.photosystem I.PSI polypeptide subunits
	Id: seq_2777
	(p12355|psaf_spiol : 182.0) Photosystem I reaction center subunit III, chloroplast precursor (Light-harvesting complex I 17 kDa protein) (PSI-F) - Spinacia oleracea (Spinach) & (at1g31330 : 176.0) Encodes subunit F of photosystem I.; photosystem I subunit F (PSAF); FUNCTIONS IN: molecular_function unknown; INVOLVED IN: photosynthesis; LOCATED IN: in 7 components; EXPRESSED IN: 25 plant structures…
Bin: 1.1.2.2	PS.lightreaction.photosystem I.PSI polypeptide subunits
	Id: seq_3341
	(at2g46820 : 151.0) Encodes the P subunit of Photosystem I. About 25% of the TMP14 pool appeared to be phosphorylated, and this ratio is not affected by light. Contains seven phosphorylation sites on threonine residue and chloroplast targeting signal. Located in the proximity of PSI-L, -H and -O subunits.; photosystem I P subunit (PSI-P); FUNCTIONS IN: DNA binding; INVOLVED IN: photosynthetic ele…
Bin: 1.1.2.2	PS.lightreaction.photosystem I.PSI polypeptide subunits
	Id: seq_3839
	(at1g08380 : 145.0) Encodes subunit O of photosystem I.; photosystem I subunit O (PSAO); FUNCTIONS IN: molecular_function unknown; INVOLVED IN: response to salt stress, photosynthesis, light harvesting in photosystem I; LOCATED IN: thylakoid, photosystem I, chloroplast; EXPRESSED IN: 21 plant structures; EXPRESSED DURING: 13 growth stages; CONTAINS InterPro DOMAIN/s: Photosystem I PsaO (InterPro:…
Bin: 1.1.2.2	PS.lightreaction.photosystem I.PSI polypeptide subunits
	Id: seq_5468
	(q39654|psal_cucsa : 165.0) Photosystem I reaction center subunit XI, chloroplast precursor (PSI-L) (PSI subunit V) - Cucumis sativus (Cucumber) & (at4g12800 : 160.0) Encodes subunit L of photosystem I reaction center.; photosystem I subunit l (PSAL); FUNCTIONS IN: molecular_function unknown; INVOLVED IN: photosynthesis, light reaction, photosynthesis; LOCATED IN: in 7 components; EXPRESSED IN: 2…
Bin: 1.1.2.2	PS.lightreaction.photosystem I.PSI polypeptide subunits
	Id: seq_7424
	(at2g46820 : 93.2) Encodes the P subunit of Photosystem I. About 25% of the TMP14 pool appeared to be phosphorylated, and this ratio is not affected by light. Contains seven phosphorylation sites on threonine residue and chloroplast targeting signal. Located in the proximity of PSI-L, -H and -O subunits.; photosystem I P subunit (PSI-P); FUNCTIONS IN: DNA binding; INVOLVED IN: photosynthetic elec…
Bin: 1.1.2.2	PS.lightreaction.photosystem I.PSI polypeptide subunits
	Id: seq_21751
	(q9bbr3|psaj_lotja : 85.5) Photosystem I reaction center subunit IX (PSI-J) - Lotus japonicus & (atcg00630 : 84.7) Encodes subunit J of photosystem I.; PSAJ; FUNCTIONS IN: molecular_function unknown; INVOLVED IN: oxidation reduction; LOCATED IN: chloroplast thylakoid membrane, photosystem I reaction center; EXPRESSED IN: 22 plant structures; EXPRESSED DURING: 13 growth stages; CONTAINS InterPro D…
Bin: 1.1.2.2	PS.lightreaction.photosystem I.PSI polypeptide subunits
	Id: seq_22222
	(at1g08380 : 83.2) Encodes subunit O of photosystem I.; photosystem I subunit O (PSAO); FUNCTIONS IN: molecular_function unknown; INVOLVED IN: response to salt stress, photosynthesis, light harvesting in photosystem I; LOCATED IN: thylakoid, photosystem I, chloroplast; EXPRESSED IN: 21 plant structures; EXPRESSED DURING: 13 growth stages; CONTAINS InterPro DOMAIN/s: Photosystem I PsaO (InterPro:I…
Bin: 1.1.2.2	PS.lightreaction.photosystem I.PSI polypeptide subunits
	Id: seq_23911
	(q39654|psal_cucsa : 148.0) Photosystem I reaction center subunit XI, chloroplast precursor (PSI-L) (PSI subunit V) - Cucumis sativus (Cucumber) & (at4g12800 : 144.0) Encodes subunit L of photosystem I reaction center.; photosystem I subunit l (PSAL); FUNCTIONS IN: molecular_function unknown; INVOLVED IN: photosynthesis, light reaction, photosynthesis; LOCATED IN: in 7 components; EXPRESSED IN: 2…
Bin: 1.1.2.2	PS.lightreaction.photosystem I.PSI polypeptide subunits
	Id: seq_24016
	(atcg01060 : 180.0) Encodes the PsaC subunit of photosystem I.; PSAC; FUNCTIONS IN: 4 iron, 4 sulfur cluster binding, electron carrier activity, iron-sulfur cluster binding; INVOLVED IN: photosynthesis; LOCATED IN: chloroplast stromal thylakoid, chloroplast thylakoid membrane, photosystem I, chloroplast, membrane; EXPRESSED IN: 23 plant structures; EXPRESSED DURING: 13 growth stages; CONTAINS Int…
Bin: 1.1.2.2	PS.lightreaction.photosystem I.PSI polypeptide subunits
	Id: seq_26324
	(at2g46820 : 111.0) Encodes the P subunit of Photosystem I. About 25% of the TMP14 pool appeared to be phosphorylated, and this ratio is not affected by light. Contains seven phosphorylation sites on threonine residue and chloroplast targeting signal. Located in the proximity of PSI-L, -H and -O subunits.; photosystem I P subunit (PSI-P); FUNCTIONS IN: DNA binding; INVOLVED IN: photosynthetic ele…
Bin: 1.1.2.2	PS.lightreaction.photosystem I.PSI polypeptide subunits
	Id: seq_26501
	(at4g02770 : 109.0) Encodes a protein predicted by sequence similarity with spinach PsaD to be photosystem I reaction center subunit II (PsaD1); photosystem I subunit D-1 (PSAD-1); FUNCTIONS IN: molecular_function unknown; INVOLVED IN: photosynthesis; LOCATED IN: in 6 components; EXPRESSED IN: 25 plant structures; EXPRESSED DURING: 14 growth stages; CONTAINS InterPro DOMAIN/s: Photosystem I prote…
Bin: 1.1.2.2	PS.lightreaction.photosystem I.PSI polypeptide subunits
	Id: seq_37397
	(p58385|psab_lotja : 510.0) Photosystem I P700 chlorophyll a apoprotein A2 (PsaB) (PSI-B) - Lotus japonicus & (atcg00340 : 509.0) Encodes the D1 subunit of photosystem I and II reaction centers.; PSAB; FUNCTIONS IN: chlorophyll binding; INVOLVED IN: photosynthesis, light harvesting in photosystem II, photosynthesis, light harvesting in photosystem I; LOCATED IN: in 7 components; EXPRESSED IN: 25 …
Bin: 1.1.2.2	PS.lightreaction.photosystem I.PSI polypeptide subunits
	Id: seq_55963
	(atcg00350 : 338.0) Encodes psaA protein comprising the reaction center for photosystem I along with psaB protein; hydrophobic protein encoded by the chloroplast genome.; PSAA; FUNCTIONS IN: chlorophyll binding; INVOLVED IN: photosynthesis; LOCATED IN: in 6 components; EXPRESSED IN: 24 plant structures; EXPRESSED DURING: 13 growth stages; CONTAINS InterPro DOMAIN/s: Photosystem I, PsaA/PsaB (Inte…
Bin: 1.1.2.2	PS.lightreaction.photosystem I.PSI polypeptide subunits
	Id: seq_60672
	(q68s06|psaa_pangi : 166.0) Photosystem I P700 chlorophyll a apoprotein A1 (PsaA) (PSI-A) - Panax ginseng (Korean ginseng) & (atcg00350 : 162.0) Encodes psaA protein comprising the reaction center for photosystem I along with psaB protein; hydrophobic protein encoded by the chloroplast genome.; PSAA; FUNCTIONS IN: chlorophyll binding; INVOLVED IN: photosynthesis; LOCATED IN: in 6 components; EXPR…
Bin: 1.1.2.2	PS.lightreaction.photosystem I.PSI polypeptide subunits
	Id: seq_78500
	(p06405|psaa_tobac : 530.0) Photosystem I P700 chlorophyll a apoprotein A1 (PsaA) (PSI-A) - Nicotiana tabacum (Common tobacco) & (atcg00350 : 524.0) Encodes psaA protein comprising the reaction center for photosystem I along with psaB protein; hydrophobic protein encoded by the chloroplast genome.; PSAA; FUNCTIONS IN: chlorophyll binding; INVOLVED IN: photosynthesis; LOCATED IN: in 6 components; …
Bin: 1.1.2.2	PS.lightreaction.photosystem I.PSI polypeptide subunits
	Id: seq_81719
	(atcg00340 : 397.0) Encodes the D1 subunit of photosystem I and II reaction centers.; PSAB; FUNCTIONS IN: chlorophyll binding; INVOLVED IN: photosynthesis, light harvesting in photosystem II, photosynthesis, light harvesting in photosystem I; LOCATED IN: in 7 components; EXPRESSED IN: 25 plant structures; EXPRESSED DURING: 13 growth stages; CONTAINS InterPro DOMAIN/s: Photosystem I psaB (InterPro…
Bin: 1.1.2.2	PS.lightreaction.photosystem I.PSI polypeptide subunits
	Id: seq_97464
	(p06512|psab_spiol : 255.0) Photosystem I P700 chlorophyll a apoprotein A2 (PsaB) (PSI-B) - Spinacia oleracea (Spinach) & (atcg00340 : 248.0) Encodes the D1 subunit of photosystem I and II reaction centers.; PSAB; FUNCTIONS IN: chlorophyll binding; INVOLVED IN: photosynthesis, light harvesting in photosystem II, photosynthesis, light harvesting in photosystem I; LOCATED IN: in 7 components; EXPRE…
Bin: 1.1.2.2	PS.lightreaction.photosystem I.PSI polypeptide subunits
	Id: seq_108583
	(p12353|psad_spiol : 125.0) Photosystem I reaction center subunit II, chloroplast precursor (Photosystem I 20 kDa subunit) (PSI-D) - Spinacia oleracea (Spinach) & (at4g02770 : 123.0) Encodes a protein predicted by sequence similarity with spinach PsaD to be photosystem I reaction center subunit II (PsaD1); photosystem I subunit D-1 (PSAD-1); FUNCTIONS IN: molecular_function unknown; INVOLVED IN: …
Bin: 1.1.2.2	PS.lightreaction.photosystem I.PSI polypeptide subunits
	Id: seq_109426
	(at1g08380 : 136.0) Encodes subunit O of photosystem I.; photosystem I subunit O (PSAO); FUNCTIONS IN: molecular_function unknown; INVOLVED IN: response to salt stress, photosynthesis, light harvesting in photosystem I; LOCATED IN: thylakoid, photosystem I, chloroplast; EXPRESSED IN: 21 plant structures; EXPRESSED DURING: 13 growth stages; CONTAINS InterPro DOMAIN/s: Photosystem I PsaO (InterPro:…
Bin: 1.1.2.1	PS.lightreaction.photosystem I.LHC-I
	Id: seq_10
	(at3g54890 : 422.0) Encodes a component of the light harvesting complex associated with photosystem I.; photosystem I light harvesting complex gene 1 (LHCA1); FUNCTIONS IN: chlorophyll binding; INVOLVED IN: response to blue light, response to red light, photosynthesis, light harvesting in photosystem I, response to far red light, photosynthesis; LOCATED IN: light-harvesting complex, chloroplast t…
Bin: 1.1.2.1	PS.lightreaction.photosystem I.LHC-I
	Id: seq_32
	(at3g47470 : 437.0) Encodes a chlorophyll a/b-binding protein that is more similar to the PSI Cab proteins than the PSII cab proteins. The predicted protein is about 20 amino acids shorter than most known Cab proteins.; light-harvesting chlorophyll-protein complex I subunit A4 (LHCA4); FUNCTIONS IN: chlorophyll binding; INVOLVED IN: response to karrikin, photosynthesis; LOCATED IN: in 7 component…
Bin: 1.1.2.1	PS.lightreaction.photosystem I.LHC-I
	Id: seq_45
	(p13869|cb12_pethy : 435.0) Chlorophyll a-b binding protein, chloroplast precursor (LHCI type II CAB) - Petunia hybrida (Petunia) & (at3g61470 : 416.0) Encodes a component of the light harvesting antenna complex of photosystem I.; photosystem I light harvesting complex gene 2 (LHCA2); FUNCTIONS IN: chlorophyll binding; INVOLVED IN: photosynthesis, light harvesting in photosystem I, photosynthesis…
Bin: 1.1.2.1	PS.lightreaction.photosystem I.LHC-I
	Id: seq_477
	(at3g54890 : 135.0) Encodes a component of the light harvesting complex associated with photosystem I.; photosystem I light harvesting complex gene 1 (LHCA1); FUNCTIONS IN: chlorophyll binding; INVOLVED IN: response to blue light, response to red light, photosynthesis, light harvesting in photosystem I, response to far red light, photosynthesis; LOCATED IN: light-harvesting complex, chloroplast t…
Bin: 1.1.2.1	PS.lightreaction.photosystem I.LHC-I
	Id: seq_1141
	(at1g19150 : 405.0) PSI type II chlorophyll a/b-binding protein (Lhca2*1) mRNA,; photosystem I light harvesting complex gene 6 (LHCA6); FUNCTIONS IN: chlorophyll binding; INVOLVED IN: response to blue light, response to red light, response to far red light, photosynthesis; LOCATED IN: light-harvesting complex, chloroplast; EXPRESSED IN: 24 plant structures; EXPRESSED DURING: 13 growth stages; CON…
Bin: 1.1.2.1	PS.lightreaction.photosystem I.LHC-I
	Id: seq_7556
	(at1g61520 : 175.0) PSI type III chlorophyll a/b-binding protein (Lhca3*1); photosystem I light harvesting complex gene 3 (LHCA3); FUNCTIONS IN: chlorophyll binding; INVOLVED IN: photosynthesis, light harvesting, photosynthesis; LOCATED IN: light-harvesting complex, chloroplast thylakoid membrane, plastoglobule; EXPRESSED IN: 23 plant structures; EXPRESSED DURING: 14 growth stages; CONTAINS Inter…
Bin: 1.1.2.1	PS.lightreaction.photosystem I.LHC-I
	Id: seq_9220
	(at1g34000 : 144.0) Encodes a novel member of the Lhc family from Arabidopsis with one predicted transmembrane alpha-helix closely related to helix I of Lhc protein from PSI (Lhca4). Gene expression is triggered by light stress and both transcript and protein accumulate in a light intensity-dependent manner. Ohp2 is associated with PSI under low- or high-light conditions.; one-helix protein 2 (OH…
Bin: 1.1.2.1	PS.lightreaction.photosystem I.LHC-I
	Id: seq_12459
	(at1g45474 : 283.0) Encodes a component of the light harvesting complex of photosystem I.; photosystem I light harvesting complex gene 5 (LHCA5); FUNCTIONS IN: pigment binding; INVOLVED IN: photosynthesis, light harvesting in photosystem I, photosynthesis; LOCATED IN: light-harvesting complex, chloroplast thylakoid membrane, photosystem I antenna complex, chloroplast, membrane; EXPRESSED IN: 21 p…
Bin: 1.1.2.1	PS.lightreaction.photosystem I.LHC-I
	Id: seq_20020
	(at1g61520 : 187.0) PSI type III chlorophyll a/b-binding protein (Lhca3*1); photosystem I light harvesting complex gene 3 (LHCA3); FUNCTIONS IN: chlorophyll binding; INVOLVED IN: photosynthesis, light harvesting, photosynthesis; LOCATED IN: light-harvesting complex, chloroplast thylakoid membrane, plastoglobule; EXPRESSED IN: 23 plant structures; EXPRESSED DURING: 14 growth stages; CONTAINS Inter…
Bin: 1.1.2.1	PS.lightreaction.photosystem I.LHC-I
	Id: seq_41755
	(at3g61470 : 168.0) Encodes a component of the light harvesting antenna complex of photosystem I.; photosystem I light harvesting complex gene 2 (LHCA2); FUNCTIONS IN: chlorophyll binding; INVOLVED IN: photosynthesis, light harvesting in photosystem I, photosynthesis; LOCATED IN: in 6 components; EXPRESSED IN: leaf; EXPRESSED DURING: seedling growth; CONTAINS InterPro DOMAIN/s: Chlorophyll A-B bi…
Bin: 1.1.2.1	PS.lightreaction.photosystem I.LHC-I
	Id: seq_68779
	(at3g54890 : 137.0) Encodes a component of the light harvesting complex associated with photosystem I.; photosystem I light harvesting complex gene 1 (LHCA1); FUNCTIONS IN: chlorophyll binding; INVOLVED IN: response to blue light, response to red light, photosynthesis, light harvesting in photosystem I, response to far red light, photosynthesis; LOCATED IN: light-harvesting complex, chloroplast t…
Bin: 1.1.2.1	PS.lightreaction.photosystem I.LHC-I
	Id: seq_70248
	(at1g19150 : 181.0) PSI type II chlorophyll a/b-binding protein (Lhca2*1) mRNA,; photosystem I light harvesting complex gene 6 (LHCA6); FUNCTIONS IN: chlorophyll binding; INVOLVED IN: response to blue light, response to red light, response to far red light, photosynthesis; LOCATED IN: light-harvesting complex, chloroplast; EXPRESSED IN: 24 plant structures; EXPRESSED DURING: 13 growth stages; CON…
Bin: 1.1.2.1	PS.lightreaction.photosystem I.LHC-I
	Id: seq_73967
	(at3g61470 : 138.0) Encodes a component of the light harvesting antenna complex of photosystem I.; photosystem I light harvesting complex gene 2 (LHCA2); FUNCTIONS IN: chlorophyll binding; INVOLVED IN: photosynthesis, light harvesting in photosystem I, photosynthesis; LOCATED IN: in 6 components; EXPRESSED IN: leaf; EXPRESSED DURING: seedling growth; CONTAINS InterPro DOMAIN/s: Chlorophyll A-B bi…
Bin: 1.1.2	PS.lightreaction.photosystem I
	Id: seq_35567
	(at3g21740 : 389.0) ACCUMULATION OF PHOTOSYSTEM ONE 4; ACCUMULATION OF PHOTOSYSTEM ONE 4 (APO4); INVOLVED IN: biological_process unknown; LOCATED IN: mitochondrion; EXPRESSED IN: 22 plant structures; EXPRESSED DURING: 13 growth stages; CONTAINS InterPro DOMAIN/s: Protein of unknown function DUF794, plant (InterPro:IPR008512); BEST Arabidopsis thaliana protein match is: Arabidopsis thaliana protei…
Bin: 1.1.1.3	PS.lightreaction.photosystem II.biogenesis
	Id: seq_6313
	(q5z5a8|p2saf_orysa : 572.0) Photosystem II stability/assembly factor HCF136, chloroplast precursor - Oryza sativa (Rice) & (at5g23120 : 570.0) encodes a stability and/or assembly factor of photosystem II; HIGH CHLOROPHYLL FLUORESCENCE 136 (HCF136); INVOLVED IN: response to cadmium ion, plastid organization, protein complex assembly; LOCATED IN: in 8 components; EXPRESSED IN: 25 plant structures;…
Bin: 1.1.1.3	PS.lightreaction.photosystem II.biogenesis
	Id: seq_24102
	(at5g23120 : 245.0) encodes a stability and/or assembly factor of photosystem II; HIGH CHLOROPHYLL FLUORESCENCE 136 (HCF136); INVOLVED IN: response to cadmium ion, plastid organization, protein complex assembly; LOCATED IN: in 8 components; EXPRESSED IN: 25 plant structures; EXPRESSED DURING: 14 growth stages; CONTAINS InterPro DOMAIN/s: BNR repeat (InterPro:IPR002860), Photosystem II stability/a…
Bin: 1.1.1.3	PS.lightreaction.photosystem II.biogenesis
	Id: seq_30645
	(q5z5a8|p2saf_orysa : 208.0) Photosystem II stability/assembly factor HCF136, chloroplast precursor - Oryza sativa (Rice) & (at5g23120 : 199.0) encodes a stability and/or assembly factor of photosystem II; HIGH CHLOROPHYLL FLUORESCENCE 136 (HCF136); INVOLVED IN: response to cadmium ion, plastid organization, protein complex assembly; LOCATED IN: in 8 components; EXPRESSED IN: 25 plant structures;…
Bin: 1.1.1.2	PS.lightreaction.photosystem II.PSII polypeptide subunits
	Id: seq_18
	(q40459|psbo_tobac : 570.0) Oxygen-evolving enhancer protein 1, chloroplast precursor (OEE1) (33 kDa subunit of oxygen evolving system of photosystem II) (OEC 33 kDa subunit) (33 kDa thylakoid membrane protein) - Nicotiana tabacum (Common tobacco) & (at3g50820 : 531.0) Encodes a protein which is an extrinsic subunit of photosystem II and which has been proposed to play a central role in stabiliza…
Bin: 1.1.1.2	PS.lightreaction.photosystem II.PSII polypeptide subunits
	Id: seq_20
	(q9slq8|psbp_cucsa : 401.0) Oxygen-evolving enhancer protein 2, chloroplast precursor (OEE2) (23 kDa subunit of oxygen evolving system of photosystem II) (OEC 23 kDa subunit) (23 kDa thylakoid membrane protein) (OEC23) - Cucumis sativus (Cucumber) & (at1g06680 : 393.0) Encodes a 23 kD extrinsic protein that is part of photosystem II and participates in the regulation of oxygen evolution.; photosy…
Bin: 1.1.1.2	PS.lightreaction.photosystem II.PSII polypeptide subunits
	Id: seq_71
	(at2g06520 : 130.0) Encodes a protein with sequence similarity to the spinach photosystem II subunit PsbX.; photosystem II subunit X (PSBX); FUNCTIONS IN: molecular_function unknown; INVOLVED IN: photosynthesis; LOCATED IN: chloroplast thylakoid membrane; EXPRESSED IN: 22 plant structures; EXPRESSED DURING: 13 growth stages; CONTAINS InterPro DOMAIN/s: Photosystem II protein PsbX (InterPro:IPR009…
Bin: 1.1.1.2	PS.lightreaction.photosystem II.PSII polypeptide subunits
	Id: seq_298
	(at4g05180 : 186.0) Encodes the PsbQ subunit of the oxygen evolving complex of photosystem II.; photosystem II subunit Q-2 (PSBQ-2); FUNCTIONS IN: calcium ion binding; INVOLVED IN: peptidyl-cysteine S-nitrosylation; LOCATED IN: in 9 components; EXPRESSED IN: 23 plant structures; EXPRESSED DURING: 14 growth stages; CONTAINS InterPro DOMAIN/s: Photosystem II oxygen evolving complex protein PsbQ (In…
Bin: 1.1.1.2	PS.lightreaction.photosystem II.PSII polypeptide subunits
	Id: seq_300
	(p80470|psby_spiol : 122.0) Photosystem II core complex proteins psbY, chloroplast precursor (L-arginine-metabolizing enzyme) (L-AME) [Contains: Photosystem II protein psbY-1 (psbY-A1); Photosystem II protein psbY-2 (psbY-A2)] - Spinacia oleracea (Spinach) & (at1g67740 : 115.0) PsbY precursor (psbY) mRNA. This single nuclear gene is imported into the chloroplasts where it is processed into two in…
Bin: 1.1.1.2	PS.lightreaction.photosystem II.PSII polypeptide subunits
	Id: seq_819
	(q41387|psbw_spiol : 155.0) Photosystem II reaction center W protein, chloroplast precursor (PSII 6.1 kDa protein) - Spinacia oleracea (Spinach) & (at2g30570 : 135.0) Encodes a protein similar to photosystem II reaction center subunit W.; photosystem II reaction center W (PSBW); FUNCTIONS IN: molecular_function unknown; INVOLVED IN: biological_process unknown; LOCATED IN: chloroplast thylakoid me…
Bin: 1.1.1.2	PS.lightreaction.photosystem II.PSII polypeptide subunits
	Id: seq_966
	(at1g03600 : 186.0) PSB27; FUNCTIONS IN: molecular_function unknown; INVOLVED IN: photosystem II repair; LOCATED IN: thylakoid, chloroplast thylakoid membrane, chloroplast thylakoid lumen, chloroplast photosystem II, chloroplast; EXPRESSED IN: 23 plant structures; EXPRESSED DURING: 13 growth stages; Has 273 Blast hits to 273 proteins in 82 species: Archae - 0; Bacteria - 114; Metazoa - 0; Fungi -…
Bin: 1.1.1.2	PS.lightreaction.photosystem II.PSII polypeptide subunits
	Id: seq_1005
	(q40519|psbr_tobac : 146.0) Photosystem II 10 kDa polypeptide, chloroplast precursor (PII10) - Nicotiana tabacum (Common tobacco) & (at1g79040 : 124.0) Encodes for the 10 kDa PsbR subunit of photosystem II (PSII). This subunit appears to be involved in the stable assembly of PSII, particularly that of the oxygen-evolving complex subunit PsbP. Mutants defective in this gene have reduced amounts of…
Bin: 1.1.1.2	PS.lightreaction.photosystem II.PSII polypeptide subunits
	Id: seq_1341
	(q02060|psbs_spiol : 354.0) Photosystem II 22 kDa protein, chloroplast precursor (CP22) - Spinacia oleracea (Spinach) & (at1g44575 : 320.0) Encoding PSII-S (CP22), a ubiquitous pigment-binding protein associated with photosystem II (PSII) of higher plants. Involved in nonphotochemical quenching rather than in photosynthesis. Mutant has a normal violaxanthin cycle but has a limited capacity of que…
Bin: 1.1.1.2	PS.lightreaction.photosystem II.PSII polypeptide subunits
	Id: seq_1649
	(at4g28660 : 217.0) Similar to PsbW subunit of photosystem II.; photosystem II reaction center PSB28 protein (PSB28); FUNCTIONS IN: molecular_function unknown; INVOLVED IN: photosynthesis; LOCATED IN: chloroplast thylakoid membrane, photosystem II reaction center; EXPRESSED IN: 22 plant structures; EXPRESSED DURING: 13 growth stages; CONTAINS InterPro DOMAIN/s: Photosystem II protein Psb28, class…
Bin: 1.1.1.2	PS.lightreaction.photosystem II.PSII polypeptide subunits
	Id: seq_1838
	(at2g30570 : 100.0) Encodes a protein similar to photosystem II reaction center subunit W.; photosystem II reaction center W (PSBW); FUNCTIONS IN: molecular_function unknown; INVOLVED IN: biological_process unknown; LOCATED IN: chloroplast thylakoid membrane; EXPRESSED IN: 22 plant structures; EXPRESSED DURING: 13 growth stages; CONTAINS InterPro DOMAIN/s: Photosystem II protein PsbW, class 2 (In…
Bin: 1.1.1.2	PS.lightreaction.photosystem II.PSII polypeptide subunits
	Id: seq_3990
	(at5g11450 : 357.0) Mog1/PsbP/DUF1795-like photosystem II reaction center PsbP family protein; FUNCTIONS IN: calcium ion binding; INVOLVED IN: photosynthesis; LOCATED IN: thylakoid, thylakoid lumen, chloroplast thylakoid membrane, chloroplast thylakoid lumen, chloroplast; EXPRESSED IN: 23 plant structures; EXPRESSED DURING: 13 growth stages; CONTAINS InterPro DOMAIN/s: Photosystem II oxygen evolv…
Bin: 1.1.1.2	PS.lightreaction.photosystem II.PSII polypeptide subunits
	Id: seq_4270
	(p26320|psbo_soltu : 113.0) Oxygen-evolving enhancer protein 1, chloroplast precursor (OEE1) (33 kDa subunit of oxygen evolving system of photosystem II) (OEC 33 kDa subunit) (33 kDa thylakoid membrane protein) - Solanum tuberosum (Potato) & (at3g50820 : 98.6) Encodes a protein which is an extrinsic subunit of photosystem II and which has been proposed to play a central role in stabilization of t…
Bin: 1.1.1.2	PS.lightreaction.photosystem II.PSII polypeptide subunits
	Id: seq_4491
	(at5g51545 : 119.0) Encodes LPA2 (low psii accumulation2), an intrinsic thylakoid membrane protein required for efficient assembly of Photosystem II.; low psii accumulation2 (LPA2); INVOLVED IN: photosystem II assembly; LOCATED IN: chloroplast, thylakoid membrane; EXPRESSED IN: 22 plant structures; EXPRESSED DURING: 13 growth stages; Has 38 Blast hits to 38 proteins in 19 species: Archae - 0; Bac…
Bin: 1.1.1.2	PS.lightreaction.photosystem II.PSII polypeptide subunits
	Id: seq_4884
	(at1g14150 : 212.0) Encodes a subunit of the NAD(P)H dehydrogenase complex located in the chloroplast thylakoid lumen.; PsbQ-like 2 (PQL2); FUNCTIONS IN: electron transporter, transferring electrons within the cyclic electron transport pathway of photosynthesis activity; INVOLVED IN: photosynthetic electron transport chain; LOCATED IN: in 6 components; EXPRESSED IN: 22 plant structures; EXPRESSED…
Bin: 1.1.1.2	PS.lightreaction.photosystem II.PSII polypeptide subunits
	Id: seq_5392
	(at1g77090 : 346.0) Mog1/PsbP/DUF1795-like photosystem II reaction center PsbP family protein; FUNCTIONS IN: calcium ion binding; INVOLVED IN: photosynthesis; LOCATED IN: thylakoid, thylakoid lumen, chloroplast thylakoid lumen, chloroplast stroma, chloroplast; EXPRESSED IN: 21 plant structures; EXPRESSED DURING: 13 growth stages; CONTAINS InterPro DOMAIN/s: Photosystem II oxygen evolving complex …
Bin: 1.1.1.2	PS.lightreaction.photosystem II.PSII polypeptide subunits
	Id: seq_7019
	(at3g55330 : 282.0) PsbP-like protein 1 (PPL1); FUNCTIONS IN: calcium ion binding; INVOLVED IN: photosynthesis; LOCATED IN: in 6 components; EXPRESSED IN: 24 plant structures; EXPRESSED DURING: 14 growth stages; CONTAINS InterPro DOMAIN/s: Photosystem II oxygen evolving complex protein PsbP (InterPro:IPR002683), Mog1/PsbP/DUF1795, alpha/beta/alpha sandwich (InterPro:IPR016124), Mog1/PsbP, alpha/b…
Bin: 1.1.1.2	PS.lightreaction.photosystem II.PSII polypeptide subunits
	Id: seq_7316
	(at3g01440 : 251.0) Encodes a subunit of the NAD(P)H complex located in the chloroplast thylakoid lumen.; PsbQ-like 1 (PQL1); FUNCTIONS IN: electron transporter, transferring electrons within the cyclic electron transport pathway of photosynthesis activity; INVOLVED IN: photosynthesis, light reaction, photosynthetic electron transport chain; LOCATED IN: in 7 components; EXPRESSED IN: 20 plant str…
Bin: 1.1.1.2	PS.lightreaction.photosystem II.PSII polypeptide subunits
	Id: seq_7833
	(at1g05385 : 201.0) Encodes a Psb27 homolog involved in photosystem II biogenesis.; LOW PSII ACCUMULATION 19 (LPA19); FUNCTIONS IN: molecular_function unknown; INVOLVED IN: photosystem II assembly; LOCATED IN: chloroplast thylakoid lumen, chloroplast; EXPRESSED IN: 24 plant structures; EXPRESSED DURING: 15 growth stages; Has 214 Blast hits to 214 proteins in 55 species: Archae - 0; Bacteria - 73;…
Bin: 1.1.1.2	PS.lightreaction.photosystem II.PSII polypeptide subunits
	Id: seq_9202
	(p93566|psbp_soltu : 155.0) Oxygen-evolving enhancer protein 2, chloroplast precursor (OEE2) (23 kDa subunit of oxygen evolving system of photosystem II) (OEC 23 kDa subunit) (23 kDa thylakoid membrane protein) - Solanum tuberosum (Potato) & (at1g06680 : 151.0) Encodes a 23 kD extrinsic protein that is part of photosystem II and participates in the regulation of oxygen evolution.; photosystem II …
Bin: 1.1.1.2	PS.lightreaction.photosystem II.PSII polypeptide subunits
	Id: seq_9863
	(at5g02120 : 115.0) Encodes a one helix protein homologous to cyanobacterial high-light inducible proteins. The protein is localized to the thylakoid membrane and its transcript is transiently induced by exposure to high light conditions.; one helix protein (OHP); FUNCTIONS IN: molecular_function unknown; INVOLVED IN: response to high light intensity; LOCATED IN: chloroplast thylakoid membrane, c…
Bin: 1.1.1.2	PS.lightreaction.photosystem II.PSII polypeptide subunits
	Id: seq_9922
	(q9xqr3|psbh_pea : 124.0) Photosystem II reaction center protein H (PSII-H) (Photosystem II 10 kDa phosphoprotein) - Pisum sativum (Garden pea) & (atcg00710 : 119.0) Encodes a 8 kD phosphoprotein that is a component of the photosystem II oxygen evolving core. Its exact molecular function has not been determined but it may play a role in mediating electron transfer between the secondary quinone ac…
Bin: 1.1.1.2	PS.lightreaction.photosystem II.PSII polypeptide subunits
	Id: seq_10507
	(at3g56650 : 355.0) Mog1/PsbP/DUF1795-like photosystem II reaction center PsbP family protein; FUNCTIONS IN: calcium ion binding; INVOLVED IN: photosynthesis; LOCATED IN: thylakoid, thylakoid lumen, chloroplast thylakoid lumen, chloroplast stroma, chloroplast; EXPRESSED IN: 21 plant structures; EXPRESSED DURING: 14 growth stages; CONTAINS InterPro DOMAIN/s: Photosystem II oxygen evolving complex …
Bin: 1.1.1.2	PS.lightreaction.photosystem II.PSII polypeptide subunits
	Id: seq_10562
	(at1g76450 : 276.0) Photosystem II reaction center PsbP family protein; FUNCTIONS IN: calcium ion binding; INVOLVED IN: photosynthesis; LOCATED IN: thylakoid, thylakoid lumen, chloroplast thylakoid membrane, chloroplast thylakoid lumen, chloroplast; EXPRESSED IN: 23 plant structures; EXPRESSED DURING: 14 growth stages; CONTAINS InterPro DOMAIN/s: Photosystem II oxygen evolving complex protein Psb…
Bin: 1.1.1.2	PS.lightreaction.photosystem II.PSII polypeptide subunits
	Id: seq_16670
	(at2g06520 : 111.0) Encodes a protein with sequence similarity to the spinach photosystem II subunit PsbX.; photosystem II subunit X (PSBX); FUNCTIONS IN: molecular_function unknown; INVOLVED IN: photosynthesis; LOCATED IN: chloroplast thylakoid membrane; EXPRESSED IN: 22 plant structures; EXPRESSED DURING: 13 growth stages; CONTAINS InterPro DOMAIN/s: Photosystem II protein PsbX (InterPro:IPR009…
Bin: 1.1.1.2	PS.lightreaction.photosystem II.PSII polypeptide subunits
	Id: seq_18550
	(at3g55330 : 209.0) PsbP-like protein 1 (PPL1); FUNCTIONS IN: calcium ion binding; INVOLVED IN: photosynthesis; LOCATED IN: in 6 components; EXPRESSED IN: 24 plant structures; EXPRESSED DURING: 14 growth stages; CONTAINS InterPro DOMAIN/s: Photosystem II oxygen evolving complex protein PsbP (InterPro:IPR002683), Mog1/PsbP/DUF1795, alpha/beta/alpha sandwich (InterPro:IPR016124), Mog1/PsbP, alpha/b…
Bin: 1.1.1.2	PS.lightreaction.photosystem II.PSII polypeptide subunits
	Id: seq_20694
	(q40519|psbr_tobac : 157.0) Photosystem II 10 kDa polypeptide, chloroplast precursor (PII10) - Nicotiana tabacum (Common tobacco) & (at1g79040 : 137.0) Encodes for the 10 kDa PsbR subunit of photosystem II (PSII). This subunit appears to be involved in the stable assembly of PSII, particularly that of the oxygen-evolving complex subunit PsbP. Mutants defective in this gene have reduced amounts of…
Bin: 1.1.1.2	PS.lightreaction.photosystem II.PSII polypeptide subunits
	Id: seq_21003
	(at2g06520 : 84.3) Encodes a protein with sequence similarity to the spinach photosystem II subunit PsbX.; photosystem II subunit X (PSBX); FUNCTIONS IN: molecular_function unknown; INVOLVED IN: photosynthesis; LOCATED IN: chloroplast thylakoid membrane; EXPRESSED IN: 22 plant structures; EXPRESSED DURING: 13 growth stages; CONTAINS InterPro DOMAIN/s: Photosystem II protein PsbX (InterPro:IPR0095…
Bin: 1.1.1.2	PS.lightreaction.photosystem II.PSII polypeptide subunits
	Id: seq_21092
	(at4g15510 : 313.0) Photosystem II reaction center PsbP family protein; FUNCTIONS IN: calcium ion binding; INVOLVED IN: photosynthesis; LOCATED IN: in 6 components; EXPRESSED IN: 21 plant structures; EXPRESSED DURING: 14 growth stages; CONTAINS InterPro DOMAIN/s: Photosystem II oxygen evolving complex protein PsbP (InterPro:IPR002683), Mog1/PsbP/DUF1795, alpha/beta/alpha sandwich (InterPro:IPR016…
Bin: 1.1.1.2	PS.lightreaction.photosystem II.PSII polypeptide subunits
	Id: seq_21306
	(at2g30570 : 87.8) Encodes a protein similar to photosystem II reaction center subunit W.; photosystem II reaction center W (PSBW); FUNCTIONS IN: molecular_function unknown; INVOLVED IN: biological_process unknown; LOCATED IN: chloroplast thylakoid membrane; EXPRESSED IN: 22 plant structures; EXPRESSED DURING: 13 growth stages; CONTAINS InterPro DOMAIN/s: Photosystem II protein PsbW, class 2 (Int…
Bin: 1.1.1.2	PS.lightreaction.photosystem II.PSII polypeptide subunits
	Id: seq_21840
	(at1g44575 : 129.0) Encoding PSII-S (CP22), a ubiquitous pigment-binding protein associated with photosystem II (PSII) of higher plants. Involved in nonphotochemical quenching rather than in photosynthesis. Mutant has a normal violaxanthin cycle but has a limited capacity of quenching singlet excited chlorophylls and is tolerant to lipid peroxidation.; NONPHOTOCHEMICAL QUENCHING 4 (NPQ4); FUNCTIO…
Bin: 1.1.1.2	PS.lightreaction.photosystem II.PSII polypeptide subunits
	Id: seq_24055
	(atcg00020 : 676.0) Encodes chlorophyll binding protein D1, a part of the photosystem II reaction center core; photosystem II reaction center protein A (PSBA); FUNCTIONS IN: chlorophyll binding; INVOLVED IN: photosynthesis, light reaction; LOCATED IN: in 6 components; EXPRESSED IN: 24 plant structures; EXPRESSED DURING: 14 growth stages; CONTAINS InterPro DOMAIN/s: Photosystem II reaction centre …
Bin: 1.1.1.2	PS.lightreaction.photosystem II.PSII polypeptide subunits
	Id: seq_24081
	(at2g28605 : 228.0) Encodes a PsbP domain-OEC23 like protein localized in thylakoid (peripheral-lumenal side).; Photosystem II reaction center PsbP family protein; FUNCTIONS IN: calcium ion binding; INVOLVED IN: photosynthesis; LOCATED IN: thylakoid, chloroplast; EXPRESSED IN: 21 plant structures; EXPRESSED DURING: 13 growth stages; CONTAINS InterPro DOMAIN/s: Photosystem II oxygen evolving compl…
Bin: 1.1.1.2	PS.lightreaction.photosystem II.PSII polypeptide subunits
	Id: seq_24185
	(at4g05180 : 119.0) Encodes the PsbQ subunit of the oxygen evolving complex of photosystem II.; photosystem II subunit Q-2 (PSBQ-2); FUNCTIONS IN: calcium ion binding; INVOLVED IN: peptidyl-cysteine S-nitrosylation; LOCATED IN: in 9 components; EXPRESSED IN: 23 plant structures; EXPRESSED DURING: 14 growth stages; CONTAINS InterPro DOMAIN/s: Photosystem II oxygen evolving complex protein PsbQ (In…
Bin: 1.1.1.2	PS.lightreaction.photosystem II.PSII polypeptide subunits
	Id: seq_25000
	(atcg00580 : 87.0) PSII cytochrome b559. There have been many speculations about the function of Cyt b559, but the most favored at present is that it plays a protective role by acting as an electron acceptor or electron donor under conditions when electron flow through PSII is not optimized.; photosystem II reaction center protein E (PSBE); FUNCTIONS IN: electron carrier activity, heme binding; I…
Bin: 1.1.1.2	PS.lightreaction.photosystem II.PSII polypeptide subunits
	Id: seq_26714
	(at3g01440 : 208.0) Encodes a subunit of the NAD(P)H complex located in the chloroplast thylakoid lumen.; PsbQ-like 1 (PQL1); FUNCTIONS IN: electron transporter, transferring electrons within the cyclic electron transport pathway of photosynthesis activity; INVOLVED IN: photosynthesis, light reaction, photosynthetic electron transport chain; LOCATED IN: in 7 components; EXPRESSED IN: 20 plant str…
Bin: 1.1.1.2	PS.lightreaction.photosystem II.PSII polypeptide subunits
	Id: seq_30917
	(q40519|psbr_tobac : 120.0) Photosystem II 10 kDa polypeptide, chloroplast precursor (PII10) - Nicotiana tabacum (Common tobacco) & (at1g79040 : 103.0) Encodes for the 10 kDa PsbR subunit of photosystem II (PSII). This subunit appears to be involved in the stable assembly of PSII, particularly that of the oxygen-evolving complex subunit PsbP. Mutants defective in this gene have reduced amounts of…
Bin: 1.1.1.2	PS.lightreaction.photosystem II.PSII polypeptide subunits
	Id: seq_33630
	(p06411|psbb_tobac : 652.0) Photosystem II P680 chlorophyll A apoprotein (CP-47 protein) - Nicotiana tabacum (Common tobacco) & (atcg00680: 650.0) encodes for CP47, subunit of the photosystem II reaction center.; photosystem II reaction center protein B (PSBB); FUNCTIONS IN: chlorophyll binding; INVOLVED IN: photosynthesis, light reaction, photosystem II assembly; LOCATED IN: in 6 components; EXP…
Bin: 1.1.1.2	PS.lightreaction.photosystem II.PSII polypeptide subunits
	Id: seq_37360
	(at1g06680 : 83.2) Encodes a 23 kD extrinsic protein that is part of photosystem II and participates in the regulation of oxygen evolution.; photosystem II subunit P-1 (PSBP-1); FUNCTIONS IN: poly(U) RNA binding; INVOLVED IN: photosynthesis, light reaction, defense response to bacterium, response to light intensity; LOCATED IN: in 9 components; EXPRESSED IN: 24 plant structures; EXPRESSED DURING:…
Bin: 1.1.1.2	PS.lightreaction.photosystem II.PSII polypeptide subunits
	Id: seq_45164
	(atcg00580 : 82.0) PSII cytochrome b559. There have been many speculations about the function of Cyt b559, but the most favored at present is that it plays a protective role by acting as an electron acceptor or electron donor under conditions when electron flow through PSII is not optimized.; photosystem II reaction center protein E (PSBE); FUNCTIONS IN: electron carrier activity, heme binding; I…
Bin: 1.1.1.2	PS.lightreaction.photosystem II.PSII polypeptide subunits
	Id: seq_46660
	(at1g76450 : 142.0) Photosystem II reaction center PsbP family protein; FUNCTIONS IN: calcium ion binding; INVOLVED IN: photosynthesis; LOCATED IN: thylakoid, thylakoid lumen, chloroplast thylakoid membrane, chloroplast thylakoid lumen, chloroplast; EXPRESSED IN: 23 plant structures; EXPRESSED DURING: 14 growth stages; CONTAINS InterPro DOMAIN/s: Photosystem II oxygen evolving complex protein Psb…
Bin: 1.1.1.2	PS.lightreaction.photosystem II.PSII polypeptide subunits
	Id: seq_51924
	(p06413|psbc_tobac : 887.0) Photosystem II 44 kDa reaction center protein (P6 protein) (CP43) - Nicotiana tabacum (Common tobacco) & (atcg00280 : 879.0) chloroplast gene encoding a CP43 subunit of the photosystem II reaction center. promoter contains a blue-light responsive element.; photosystem II reaction center protein C (PSBC); FUNCTIONS IN: chlorophyll binding; INVOLVED IN: photosynthesis, l…
Bin: 1.1.1.2	PS.lightreaction.photosystem II.PSII polypeptide subunits
	Id: seq_53112
	(q9bbt0|psbd_lotja : 382.0) Photosystem II D2 protein (Photosystem Q(A) protein) (PSII D2 protein) - Lotus japonicus & (atcg00270 : 376.0) PSII D2 protein; photosystem II reaction center protein D (PSBD); FUNCTIONS IN: electron transporter, transferring electrons within the noncyclic electron transport pathway of photosynthesis activity; INVOLVED IN: photosynthetic electron transport in photosyst…
Bin: 1.1.1.2	PS.lightreaction.photosystem II.PSII polypeptide subunits
	Id: seq_54294
	(at4g15510 : 105.0) Photosystem II reaction center PsbP family protein; FUNCTIONS IN: calcium ion binding; INVOLVED IN: photosynthesis; LOCATED IN: in 6 components; EXPRESSED IN: 21 plant structures; EXPRESSED DURING: 14 growth stages; CONTAINS InterPro DOMAIN/s: Photosystem II oxygen evolving complex protein PsbP (InterPro:IPR002683), Mog1/PsbP/DUF1795, alpha/beta/alpha sandwich (InterPro:IPR016…
Bin: 1.1.1.2	PS.lightreaction.photosystem II.PSII polypeptide subunits
	Id: seq_56119
	(at3g55330 : 127.0) PsbP-like protein 1 (PPL1); FUNCTIONS IN: calcium ion binding; INVOLVED IN: photosynthesis; LOCATED IN: in 6 components; EXPRESSED IN: 24 plant structures; EXPRESSED DURING: 14 growth stages; CONTAINS InterPro DOMAIN/s: Photosystem II oxygen evolving complex protein PsbP (InterPro:IPR002683), Mog1/PsbP/DUF1795, alpha/beta/alpha sandwich (InterPro:IPR016124), Mog1/PsbP, alpha/b…
Bin: 1.1.1.2	PS.lightreaction.photosystem II.PSII polypeptide subunits
	Id: seq_57997
	(at2g28605 : 162.0) Encodes a PsbP domain-OEC23 like protein localized in thylakoid (peripheral-lumenal side).; Photosystem II reaction center PsbP family protein; FUNCTIONS IN: calcium ion binding; INVOLVED IN: photosynthesis; LOCATED IN: thylakoid, chloroplast; EXPRESSED IN: 21 plant structures; EXPRESSED DURING: 13 growth stages; CONTAINS InterPro DOMAIN/s: Photosystem II oxygen evolving compl…
Bin: 1.1.1.2	PS.lightreaction.photosystem II.PSII polypeptide subunits
	Id: seq_74812
	(at4g15510 : 115.0) Photosystem II reaction center PsbP family protein; FUNCTIONS IN: calcium ion binding; INVOLVED IN: photosynthesis; LOCATED IN: in 6 components; EXPRESSED IN: 21 plant structures; EXPRESSED DURING: 14 growth stages; CONTAINS InterPro DOMAIN/s: Photosystem II oxygen evolving complex protein PsbP (InterPro:IPR002683), Mog1/PsbP/DUF1795, alpha/beta/alpha sandwich (InterPro:IPR016…
Bin: 1.1.1.2	PS.lightreaction.photosystem II.PSII polypeptide subunits
	Id: seq_108985
	(at1g77090 : 86.3) Mog1/PsbP/DUF1795-like photosystem II reaction center PsbP family protein; FUNCTIONS IN: calcium ion binding; INVOLVED IN: photosynthesis; LOCATED IN: thylakoid, thylakoid lumen, chloroplast thylakoid lumen, chloroplast stroma, chloroplast; EXPRESSED IN: 21 plant structures; EXPRESSED DURING: 13 growth stages; CONTAINS InterPro DOMAIN/s: Photosystem II oxygen evolving complex p…
Bin: 1.1.1.1	PS.lightreaction.photosystem II.LHC-II
	Id: seq_1
	(p12333|cb2a_spiol : 390.0) Chlorophyll a-b binding protein, chloroplast precursor (LHCII type I CAB) (LHCP) - Spinacia oleracea (Spinach) & (at2g34430 : 363.0) Photosystem II type I chlorophyll a/b-binding protein; light-harvesting chlorophyll-protein complex II subunit B1 (LHB1B1); FUNCTIONS IN: chlorophyll binding; INVOLVED IN: photosynthesis, light harvesting in photosystem II, photosynthesis…
Bin: 1.1.1.1	PS.lightreaction.photosystem II.LHC-II
	Id: seq_3
	(p27519|cb23_orysa : 481.0) Chlorophyll a-b binding protein, chloroplast precursor (LHCII type I CAB) (LHCP) - Oryza sativa (Rice) & (at2g05070: 473.0) Encodes Lhcb2.2. Belongs to the Lhc super-gene family encodes the light-harvesting chlorophyll a/b-binding (LHC) proteins that constitute the antenna system of the photosynthetic apparatus.; photosystem II light harvesting complex gene 2.2 (LHCB2.…
Bin: 1.1.1.1	PS.lightreaction.photosystem II.LHC-II
	Id: seq_4
	(p09756|cb23_soybn : 374.0) Chlorophyll a-b binding protein 3, chloroplast precursor (LHCII type I CAB-3) (LHCP) - Glycine max (Soybean) & (at1g29930 : 343.0) Subunit of light-harvesting complex II (LHCII),which absorbs light and transfers energy to the photosynthetic reaction center.; chlorophyll A/B binding protein 1 (CAB1); FUNCTIONS IN: chlorophyll binding; INVOLVED IN: photosynthesis; LOCATE…
Bin: 1.1.1.1	PS.lightreaction.photosystem II.LHC-II
	Id: seq_11
	(p27497|cb29_maize : 115.0) Chlorophyll a-b binding protein M9, chloroplast precursor (LHCII type I CAB-M9) (LHCP) - Zea mays (Maize) & (at2g34420 : 113.0) Photosystem II type I chlorophyll a/b-binding protein; photosystem II light harvesting complex gene B1B2 (LHB1B2); FUNCTIONS IN: chlorophyll binding; INVOLVED IN: photosynthesis, light harvesting in photosystem II, photosynthesis; LOCATED IN: …
Bin: 1.1.1.1	PS.lightreaction.photosystem II.LHC-II
	Id: seq_17
	(p27492|cb21_tobac : 480.0) Chlorophyll a-b binding protein 16, chloroplast precursor (LHCII type I CAB-16) (LHCP) - Nicotiana tabacum (Common tobacco) & (at2g34420 : 460.0) Photosystem II type I chlorophyll a/b-binding protein; photosystem II light harvesting complex gene B1B2 (LHB1B2); FUNCTIONS IN: chlorophyll binding; INVOLVED IN: photosynthesis, light harvesting in photosystem II, photosynth…
Bin: 1.1.1.1	PS.lightreaction.photosystem II.LHC-II
	Id: seq_22
	(p27495|cb24_tobac : 115.0) Chlorophyll a-b binding protein 40, chloroplast precursor (LHCII type I CAB-40) (LHCP) - Nicotiana tabacum (Common tobacco) & (at2g34420 : 112.0) Photosystem II type I chlorophyll a/b-binding protein; photosystem II light harvesting complex gene B1B2 (LHB1B2); FUNCTIONS IN: chlorophyll binding; INVOLVED IN: photosynthesis, light harvesting in photosystem II, photosynth…
Bin: 1.1.1.1	PS.lightreaction.photosystem II.LHC-II
	Id: seq_26
	(at3g08940 : 478.0) Lhcb4.2 protein (Lhcb4.2, protein involved in the light harvesting complex of photosystem II; light harvesting complex photosystem II (LHCB4.2); FUNCTIONS IN: chlorophyll binding; INVOLVED IN: response to blue light, response to red light, response to far red light; LOCATED IN: thylakoid, chloroplast thylakoid membrane, chloroplast, membrane, chloroplast envelope; EXPRESSED IN…
Bin: 1.1.1.1	PS.lightreaction.photosystem II.LHC-II
	Id: seq_44
	(p12333|cb2a_spiol : 282.0) Chlorophyll a-b binding protein, chloroplast precursor (LHCII type I CAB) (LHCP) - Spinacia oleracea (Spinach) & (at1g29930 : 268.0) Subunit of light-harvesting complex II (LHCII),which absorbs light and transfers energy to the photosynthetic reaction center.; chlorophyll A/B binding protein 1 (CAB1); FUNCTIONS IN: chlorophyll binding; INVOLVED IN: photosynthesis; LOCA…
Bin: 1.1.1.1	PS.lightreaction.photosystem II.LHC-II
	Id: seq_465
	(at5g54270 : 483.0) Lhcb3 protein is a component of the main light harvesting chlorophyll a/b-protein complex of Photosystem II (LHC II).; light-harvesting chlorophyll B-binding protein 3 (LHCB3); FUNCTIONS IN: structural molecule activity; INVOLVED IN: photosynthesis; LOCATED IN: light-harvesting complex, thylakoid, chloroplast thylakoid membrane, chloroplast; EXPRESSED IN: 24 plant structures; …
Bin: 1.1.1.1	PS.lightreaction.photosystem II.LHC-II
	Id: seq_546
	(at1g15820 : 422.0) Lhcb6 protein (Lhcb6), light harvesting complex of photosystem II.; light harvesting complex photosystem II subunit 6 (LHCB6); FUNCTIONS IN: chlorophyll binding; INVOLVED IN: photosynthesis, nonphotochemical quenching; LOCATED IN: in 7 components; EXPRESSED IN: 24 plant structures; EXPRESSED DURING: 14 growth stages; CONTAINS InterPro DOMAIN/s: Chlorophyll A-B binding protein …
Bin: 1.1.1.1	PS.lightreaction.photosystem II.LHC-II
	Id: seq_1298
	(at2g40100 : 355.0) Lhcb4:3 protein (Lhcb4.3, light harvesting complex of photosystem II; light harvesting complex photosystem II (LHCB4.3); CONTAINS InterPro DOMAIN/s: Chlorophyll A-B binding protein (InterPro:IPR001344); BEST Arabidopsis thaliana protein match is: light harvesting complex photosystem II (TAIR:AT3G08940.2). & (q93wd2|cb29_chlre : 224.0) Chlorophyll a-b binding protein CP29 - Chl…
Bin: 1.1.1.1	PS.lightreaction.photosystem II.LHC-II
	Id: seq_2384
	(at2g05100 : 386.0) Lhcb2.1 protein encoding a subunit of the light harvesting complex II. Member of a gene family with high degree of sequence similarity. Initially LHCB2.3 was considered as a separate gene but appears to be an allele of LHCB2.1.; photosystem II light harvesting complex gene 2.1 (LHCB2.1); FUNCTIONS IN: chlorophyll binding; INVOLVED IN: response to salt stress, response to blue …
Bin: 1.1.1.1	PS.lightreaction.photosystem II.LHC-II
	Id: seq_3449
	(at4g10340 : 292.0) photosystem II encoding the light-harvesting chlorophyll a/b binding protein CP26 of the antenna system of the photosynthetic apparatus; light harvesting complex of photosystem II 5 (LHCB5); FUNCTIONS IN: chlorophyll binding; INVOLVED IN: response to blue light, response to red light, response to far red light, photosynthesis, nonphotochemical quenching; LOCATED IN: in 9 compo…
Bin: 1.1.1.1	PS.lightreaction.photosystem II.LHC-II
	Id: seq_3546
	(at4g10340 : 174.0) photosystem II encoding the light-harvesting chlorophyll a/b binding protein CP26 of the antenna system of the photosynthetic apparatus; light harvesting complex of photosystem II 5 (LHCB5); FUNCTIONS IN: chlorophyll binding; INVOLVED IN: response to blue light, response to red light, response to far red light, photosynthesis, nonphotochemical quenching; LOCATED IN: in 9 compo…
Bin: 1.1.1.1	PS.lightreaction.photosystem II.LHC-II
	Id: seq_4361
	(p08222|cb22_cucsa : 254.0) Chlorophyll a-b binding protein of LHCII type 1 (Chlorophyll a-b binding protein of LHCII type I) (CAB) (LHCP) (Fragment) - Cucumis sativus (Cucumber) & (at2g34420 : 236.0) Photosystem II type I chlorophyll a/b-binding protein; photosystem II light harvesting complex gene B1B2 (LHB1B2); FUNCTIONS IN: chlorophyll binding; INVOLVED IN: photosynthesis, light harvesting in…
Bin: 1.1.1.1	PS.lightreaction.photosystem II.LHC-II
	Id: seq_4895
	(p27518|cb21_goshi : 185.0) Chlorophyll a-b binding protein 151, chloroplast precursor (LHCII type II CAB-151) (LHCP) - Gossypium hirsutum (Upland cotton) & (at3g27690 : 182.0) Encodes Lhcb2.4. Belongs to the Lhc super-gene family encodes the light-harvesting chlorophyll a/b-binding (LHC) proteins that constitute the antenna system of the photosynthetic apparatus.; photosystem II light harvesting…
Bin: 1.1.1.1	PS.lightreaction.photosystem II.LHC-II
	Id: seq_6583
	(at1g76570 : 506.0) Chlorophyll A-B binding family protein; FUNCTIONS IN: chlorophyll binding; INVOLVED IN: response to blue light, response to far red light, photosynthesis; LOCATED IN: light-harvesting complex, chloroplast, membrane; EXPRESSED IN: 28 plant structures; EXPRESSED DURING: 13 growth stages; CONTAINS InterPro DOMAIN/s: Chlorophyll A-B binding protein (InterPro:IPR001344); BEST Arabi…
Bin: 1.1.1.1	PS.lightreaction.photosystem II.LHC-II
	Id: seq_8372
	(p08222|cb22_cucsa : 274.0) Chlorophyll a-b binding protein of LHCII type 1 (Chlorophyll a-b binding protein of LHCII type I) (CAB) (LHCP) (Fragment) - Cucumis sativus (Cucumber) & (at2g34420 : 257.0) Photosystem II type I chlorophyll a/b-binding protein; photosystem II light harvesting complex gene B1B2 (LHB1B2); FUNCTIONS IN: chlorophyll binding; INVOLVED IN: photosynthesis, light harvesting in…
Bin: 1.1.1.1	PS.lightreaction.photosystem II.LHC-II
	Id: seq_11226
	(at4g10340 : 96.7) photosystem II encoding the light-harvesting chlorophyll a/b binding protein CP26 of the antenna system of the photosynthetic apparatus; light harvesting complex of photosystem II 5 (LHCB5); FUNCTIONS IN: chlorophyll binding; INVOLVED IN: response to blue light, response to red light, response to far red light, photosynthesis, nonphotochemical quenching; LOCATED IN: in 9 compon…
Bin: 1.1.1.1	PS.lightreaction.photosystem II.LHC-II
	Id: seq_14958
	(p27495|cb24_tobac : 115.0) Chlorophyll a-b binding protein 40, chloroplast precursor (LHCII type I CAB-40) (LHCP) - Nicotiana tabacum (Common tobacco) & (at2g34420 : 112.0) Photosystem II type I chlorophyll a/b-binding protein; photosystem II light harvesting complex gene B1B2 (LHB1B2); FUNCTIONS IN: chlorophyll binding; INVOLVED IN: photosynthesis, light harvesting in photosystem II, photosynth…
Bin: 1.1.1.1	PS.lightreaction.photosystem II.LHC-II
	Id: seq_18008
	(at1g15820 : 215.0) Lhcb6 protein (Lhcb6), light harvesting complex of photosystem II.; light harvesting complex photosystem II subunit 6 (LHCB6); FUNCTIONS IN: chlorophyll binding; INVOLVED IN: photosynthesis, nonphotochemical quenching; LOCATED IN: in 7 components; EXPRESSED IN: 24 plant structures; EXPRESSED DURING: 14 growth stages; CONTAINS InterPro DOMAIN/s: Chlorophyll A-B binding protein …
Bin: 1.1.1.1	PS.lightreaction.photosystem II.LHC-II
	Id: seq_20277
	(p27519|cb23_orysa : 196.0) Chlorophyll a-b binding protein, chloroplast precursor (LHCII type I CAB) (LHCP) - Oryza sativa (Rice) & (at3g27690: 189.0) Encodes Lhcb2.4. Belongs to the Lhc super-gene family encodes the light-harvesting chlorophyll a/b-binding (LHC) proteins that constitute the antenna system of the photosynthetic apparatus.; photosystem II light harvesting complex gene 2.3 (LHCB2.…
Bin: 1.1.1.1	PS.lightreaction.photosystem II.LHC-II
	Id: seq_20280
	(p27519|cb23_orysa : 155.0) Chlorophyll a-b binding protein, chloroplast precursor (LHCII type I CAB) (LHCP) - Oryza sativa (Rice) & (at2g05070: 150.0) Encodes Lhcb2.2. Belongs to the Lhc super-gene family encodes the light-harvesting chlorophyll a/b-binding (LHC) proteins that constitute the antenna system of the photosynthetic apparatus.; photosystem II light harvesting complex gene 2.2 (LHCB2.…
Bin: 1.1.1.1	PS.lightreaction.photosystem II.LHC-II
	Id: seq_20290
	(at4g10340 : 153.0) photosystem II encoding the light-harvesting chlorophyll a/b binding protein CP26 of the antenna system of the photosynthetic apparatus; light harvesting complex of photosystem II 5 (LHCB5); FUNCTIONS IN: chlorophyll binding; INVOLVED IN: response to blue light, response to red light, response to far red light, photosynthesis, nonphotochemical quenching; LOCATED IN: in 9 compo…
Bin: 1.1.1.1	PS.lightreaction.photosystem II.LHC-II
	Id: seq_20295
	(p09755|cb22_soybn : 146.0) Chlorophyll a-b binding protein 2, chloroplast precursor (LHCII type I CAB-2) (LHCP) - Glycine max (Soybean) & (at2g34420 : 138.0) Photosystem II type I chlorophyll a/b-binding protein; photosystem II light harvesting complex gene B1B2 (LHB1B2); FUNCTIONS IN: chlorophyll binding; INVOLVED IN: photosynthesis, light harvesting in photosystem II, photosynthesis; LOCATED I…
Bin: 1.1.1.1	PS.lightreaction.photosystem II.LHC-II
	Id: seq_21062
	(at5g54270 : 185.0) Lhcb3 protein is a component of the main light harvesting chlorophyll a/b-protein complex of Photosystem II (LHC II).; light-harvesting chlorophyll B-binding protein 3 (LHCB3); FUNCTIONS IN: structural molecule activity; INVOLVED IN: photosynthesis; LOCATED IN: light-harvesting complex, thylakoid, chloroplast thylakoid membrane, chloroplast; EXPRESSED IN: 24 plant structures; …
Bin: 1.1.1.1	PS.lightreaction.photosystem II.LHC-II
	Id: seq_21133
	(at1g15820 : 90.5) Lhcb6 protein (Lhcb6), light harvesting complex of photosystem II.; light harvesting complex photosystem II subunit 6 (LHCB6); FUNCTIONS IN: chlorophyll binding; INVOLVED IN: photosynthesis, nonphotochemical quenching; LOCATED IN: in 7 components; EXPRESSED IN: 24 plant structures; EXPRESSED DURING: 14 growth stages; CONTAINS InterPro DOMAIN/s: Chlorophyll A-B binding protein (…
Bin: 1.1.1.1	PS.lightreaction.photosystem II.LHC-II
	Id: seq_21977
	(p06671|cb22_maize : 162.0) Chlorophyll a-b binding protein, chloroplast precursor (LHCII type I CAB) (LHCP) - Zea mays (Maize) & (at2g34420 : 155.0) Photosystem II type I chlorophyll a/b-binding protein; photosystem II light harvesting complex gene B1B2 (LHB1B2); FUNCTIONS IN: chlorophyll binding; INVOLVED IN: photosynthesis, light harvesting in photosystem II, photosynthesis; LOCATED IN: in 7 c…
Bin: 1.1.1.1	PS.lightreaction.photosystem II.LHC-II
	Id: seq_22100
	(p08222|cb22_cucsa : 136.0) Chlorophyll a-b binding protein of LHCII type 1 (Chlorophyll a-b binding protein of LHCII type I) (CAB) (LHCP) (Fragment) - Cucumis sativus (Cucumber) & (at2g34420 : 132.0) Photosystem II type I chlorophyll a/b-binding protein; photosystem II light harvesting complex gene B1B2 (LHB1B2); FUNCTIONS IN: chlorophyll binding; INVOLVED IN: photosynthesis, light harvesting in…
Bin: 1.1.1.1	PS.lightreaction.photosystem II.LHC-II
	Id: seq_23861
	(p08221|cb21_cucsa : 293.0) Chlorophyll a-b binding protein of LHCII type I, chloroplast precursor (CAB) (LHCP) (Fragment) - Cucumis sativus (Cucumber) & (at2g34420 : 276.0) Photosystem II type I chlorophyll a/b-binding protein; photosystem II light harvesting complex gene B1B2 (LHB1B2); FUNCTIONS IN: chlorophyll binding; INVOLVED IN: photosynthesis, light harvesting in photosystem II, photosynth…
Bin: 1.1.1.1	PS.lightreaction.photosystem II.LHC-II
	Id: seq_23892
	(p27495|cb24_tobac : 129.0) Chlorophyll a-b binding protein 40, chloroplast precursor (LHCII type I CAB-40) (LHCP) - Nicotiana tabacum (Common tobacco) & (at2g34420 : 127.0) Photosystem II type I chlorophyll a/b-binding protein; photosystem II light harvesting complex gene B1B2 (LHB1B2); FUNCTIONS IN: chlorophyll binding; INVOLVED IN: photosynthesis, light harvesting in photosystem II, photosynth…
Bin: 1.1.1.1	PS.lightreaction.photosystem II.LHC-II
	Id: seq_24452
	(at1g76570 : 129.0) Chlorophyll A-B binding family protein; FUNCTIONS IN: chlorophyll binding; INVOLVED IN: response to blue light, response to far red light, photosynthesis; LOCATED IN: light-harvesting complex, chloroplast, membrane; EXPRESSED IN: 28 plant structures; EXPRESSED DURING: 13 growth stages; CONTAINS InterPro DOMAIN/s: Chlorophyll A-B binding protein (InterPro:IPR001344); BEST Arabi…
Bin: 1.1.1.1	PS.lightreaction.photosystem II.LHC-II
	Id: seq_25213
	(at3g08940 : 82.0) Lhcb4.2 protein (Lhcb4.2, protein involved in the light harvesting complex of photosystem II; light harvesting complex photosystem II (LHCB4.2); FUNCTIONS IN: chlorophyll binding; INVOLVED IN: response to blue light, response to red light, response to far red light; LOCATED IN: thylakoid, chloroplast thylakoid membrane, chloroplast, membrane, chloroplast envelope; EXPRESSED IN:…
Bin: 1.1.1.1	PS.lightreaction.photosystem II.LHC-II
	Id: seq_30127
	(at5g54270 : 88.6) Lhcb3 protein is a component of the main light harvesting chlorophyll a/b-protein complex of Photosystem II (LHC II).; light-harvesting chlorophyll B-binding protein 3 (LHCB3); FUNCTIONS IN: structural molecule activity; INVOLVED IN: photosynthesis; LOCATED IN: light-harvesting complex, thylakoid, chloroplast thylakoid membrane, chloroplast; EXPRESSED IN: 24 plant structures; E…
Bin: 1.1.1.1	PS.lightreaction.photosystem II.LHC-II
	Id: seq_33893
	(at4g10340 : 112.0) photosystem II encoding the light-harvesting chlorophyll a/b binding protein CP26 of the antenna system of the photosynthetic apparatus; light harvesting complex of photosystem II 5 (LHCB5); FUNCTIONS IN: chlorophyll binding; INVOLVED IN: response to blue light, response to red light, response to far red light, photosynthesis, nonphotochemical quenching; LOCATED IN: in 9 compo…
Bin: 1.1.1.1	PS.lightreaction.photosystem II.LHC-II
	Id: seq_35948
	(p12331|cb22_orysa : 143.0) Chlorophyll a-b binding protein 2, chloroplast precursor (LHCII type I CAB-2) (LHCP) - Oryza sativa (Rice) & (at2g34420 : 138.0) Photosystem II type I chlorophyll a/b-binding protein; photosystem II light harvesting complex gene B1B2 (LHB1B2); FUNCTIONS IN: chlorophyll binding; INVOLVED IN: photosynthesis, light harvesting in photosystem II, photosynthesis; LOCATED IN:…
Bin: 1.1.1.1	PS.lightreaction.photosystem II.LHC-II
	Id: seq_39374
	(at1g76570 : 177.0) Chlorophyll A-B binding family protein; FUNCTIONS IN: chlorophyll binding; INVOLVED IN: response to blue light, response to far red light, photosynthesis; LOCATED IN: light-harvesting complex, chloroplast, membrane; EXPRESSED IN: 28 plant structures; EXPRESSED DURING: 13 growth stages; CONTAINS InterPro DOMAIN/s: Chlorophyll A-B binding protein (InterPro:IPR001344); BEST Arabi…
Bin: 1.1.1.1	PS.lightreaction.photosystem II.LHC-II
	Id: seq_44370
	(at2g40100 : 84.7) Lhcb4:3 protein (Lhcb4.3, light harvesting complex of photosystem II; light harvesting complex photosystem II (LHCB4.3); CONTAINS InterPro DOMAIN/s: Chlorophyll A-B binding protein (InterPro:IPR001344); BEST Arabidopsis thaliana protein match is: light harvesting complex photosystem II (TAIR:AT3G08940.2). & (reliability: 169.4) & (original description: no original description)
Bin: 1.1.1.1	PS.lightreaction.photosystem II.LHC-II
	Id: seq_46452
	(at1g76570 : 180.0) Chlorophyll A-B binding family protein; FUNCTIONS IN: chlorophyll binding; INVOLVED IN: response to blue light, response to far red light, photosynthesis; LOCATED IN: light-harvesting complex, chloroplast, membrane; EXPRESSED IN: 28 plant structures; EXPRESSED DURING: 13 growth stages; CONTAINS InterPro DOMAIN/s: Chlorophyll A-B binding protein (InterPro:IPR001344); BEST Arabi…
Bin: 1.1.1.1	PS.lightreaction.photosystem II.LHC-II
	Id: seq_52095
	(p27518|cb21_goshi : 178.0) Chlorophyll a-b binding protein 151, chloroplast precursor (LHCII type II CAB-151) (LHCP) - Gossypium hirsutum (Upland cotton) & (at2g05070 : 176.0) Encodes Lhcb2.2. Belongs to the Lhc super-gene family encodes the light-harvesting chlorophyll a/b-binding (LHC) proteins that constitute the antenna system of the photosynthetic apparatus.; photosystem II light harvesting…
Bin: 1.1.1.1	PS.lightreaction.photosystem II.LHC-II
	Id: seq_58471
	(at5g01530 : 137.0) light harvesting complex photosystem II (LHCB4.1); FUNCTIONS IN: chlorophyll binding; INVOLVED IN: response to blue light, response to red light, response to far red light, photosynthesis; LOCATED IN: in 6 components; EXPRESSED IN: 27 plant structures; EXPRESSED DURING: 14 growth stages; CONTAINS InterPro DOMAIN/s: Chlorophyll A-B binding protein (InterPro:IPR001344); BEST Ara…
Bin: 1.1.1.1	PS.lightreaction.photosystem II.LHC-II
	Id: seq_72050
	(p12470|cb25_nicpl : 119.0) Chlorophyll a-b binding protein E, chloroplast precursor (LHCII type I CAB-E) (LHCP) - Nicotiana plumbaginifolia (Leadwort-leaved tobacco) & (at1g29930 : 108.0) Subunit of light-harvesting complex II (LHCII),which absorbs light and transfers energy to the photosynthetic reaction center.; chlorophyll A/B binding protein 1 (CAB1); FUNCTIONS IN: chlorophyll binding; INVOL…
Bin: 1.1.1.1	PS.lightreaction.photosystem II.LHC-II
	Id: seq_84702
	(at1g76570 : 98.6) Chlorophyll A-B binding family protein; FUNCTIONS IN: chlorophyll binding; INVOLVED IN: response to blue light, response to far red light, photosynthesis; LOCATED IN: light-harvesting complex, chloroplast, membrane; EXPRESSED IN: 28 plant structures; EXPRESSED DURING: 13 growth stages; CONTAINS InterPro DOMAIN/s: Chlorophyll A-B binding protein (InterPro:IPR001344); BEST Arabid…
Bin: 1.1.1.1	PS.lightreaction.photosystem II.LHC-II
	Id: seq_106544
	(p09756|cb23_soybn : 150.0) Chlorophyll a-b binding protein 3, chloroplast precursor (LHCII type I CAB-3) (LHCP) - Glycine max (Soybean) & (at2g34420 : 139.0) Photosystem II type I chlorophyll a/b-binding protein; photosystem II light harvesting complex gene B1B2 (LHB1B2); FUNCTIONS IN: chlorophyll binding; INVOLVED IN: photosynthesis, light harvesting in photosystem II, photosynthesis; LOCATED I…
Bin: 1.1.1.1	PS.lightreaction.photosystem II.LHC-II
	Id: seq_112771
	(p12471|cb21_soybn : 142.0) Chlorophyll a-b binding protein, chloroplast precursor (LHCII type I CAB) (LHCP) (Fragment) - Glycine max (Soybean) & (at2g34430 : 123.0) Photosystem II type I chlorophyll a/b-binding protein; light-harvesting chlorophyll-protein complex II subunit B1 (LHB1B1); FUNCTIONS IN: chlorophyll binding; INVOLVED IN: photosynthesis, light harvesting in photosystem II, photosynt…
Bin: 1.1.1.1	PS.lightreaction.photosystem II.LHC-II
	Id: seq_115846
	(p09756|cb23_soybn : 136.0) Chlorophyll a-b binding protein 3, chloroplast precursor (LHCII type I CAB-3) (LHCP) - Glycine max (Soybean) & (at2g34420 : 121.0) Photosystem II type I chlorophyll a/b-binding protein; photosystem II light harvesting complex gene B1B2 (LHB1B2); FUNCTIONS IN: chlorophyll binding; INVOLVED IN: photosynthesis, light harvesting in photosystem II, photosynthesis; LOCATED I…
Bin: 1	PS
	Id: seq_4985
	(at5g38660 : 288.0) mutant has Altered acclimation responses;; ACCLIMATION OF PHOTOSYNTHESIS TO ENVIRONMENT (APE1); CONTAINS InterPro DOMAIN/s: Protein of unknown function DUF2854 (InterPro:IPR021275), Proteasome maturation factor UMP1 (InterPro:IPR008012); BEST Arabidopsis thaliana protein match is: Proteasome maturation factor UMP1 (TAIR:AT5G38650.1). & (ipr021275 : 126.30571) Protein of unknow…
Bin: 1	PS
	Id: seq_10641
	(at5g38660 : 224.0) mutant has Altered acclimation responses;; ACCLIMATION OF PHOTOSYNTHESIS TO ENVIRONMENT (APE1); CONTAINS InterPro DOMAIN/s: Protein of unknown function DUF2854 (InterPro:IPR021275), Proteasome maturation factor UMP1 (InterPro:IPR008012); BEST Arabidopsis thaliana protein match is: Proteasome maturation factor UMP1 (TAIR:AT5G38650.1). & (ipr008012 : 105.51345) Proteasome matura…
Bin: 1	PS
	Id: seq_10731
	(at5g38660 : 128.0) mutant has Altered acclimation responses;; ACCLIMATION OF PHOTOSYNTHESIS TO ENVIRONMENT (APE1); CONTAINS InterPro DOMAIN/s: Protein of unknown function DUF2854 (InterPro:IPR021275), Proteasome maturation factor UMP1 (InterPro:IPR008012); BEST Arabidopsis thaliana protein match is: Proteasome maturation factor UMP1 (TAIR:AT5G38650.1). & (reliability: 256.0) & (original descript…
Bin: 1	PS
	Id: seq_18339
	(at5g38660 : 222.0) mutant has Altered acclimation responses;; ACCLIMATION OF PHOTOSYNTHESIS TO ENVIRONMENT (APE1); CONTAINS InterPro DOMAIN/s: Protein of unknown function DUF2854 (InterPro:IPR021275), Proteasome maturation factor UMP1 (InterPro:IPR008012); BEST Arabidopsis thaliana protein match is: Proteasome maturation factor UMP1 (TAIR:AT5G38650.1). & (ipr008012 : 105.130455) Proteasome matur…
2. major CHO metabolism
Bin: 2.2.2.10	major CHO metabolism.degradation.starch.laforin like phosphoglucan phosphatase (SEX4)
	Id: seq_4799
	(at3g52180 : 465.0) Encodes a plant-specific protein phosphatase that contains a protein tyrosine phosphatase (PTP) catalytic domain and a kinase interaction sequence (KIS) domain. This protein interacts with the plant SnRK AKIN11. Binds starch. Localized in the chloroplast.; STARCH-EXCESS 4 (SEX4); FUNCTIONS IN: protein tyrosine/serine/threonine phosphatase activity, polysaccharide binding; INVO…
Bin: 2.2.2.10	major CHO metabolism.degradation.starch.laforin like phosphoglucan phosphatase (SEX4)
	Id: seq_8185
	(at3g52180 : 190.0) Encodes a plant-specific protein phosphatase that contains a protein tyrosine phosphatase (PTP) catalytic domain and a kinase interaction sequence (KIS) domain. This protein interacts with the plant SnRK AKIN11. Binds starch. Localized in the chloroplast.; STARCH-EXCESS 4 (SEX4); FUNCTIONS IN: protein tyrosine/serine/threonine phosphatase activity, polysaccharide binding; INVO…
Bin: 2.2.2.10	major CHO metabolism.degradation.starch.laforin like phosphoglucan phosphatase (SEX4)
	Id: seq_8806
	(at3g52180 : 221.0) Encodes a plant-specific protein phosphatase that contains a protein tyrosine phosphatase (PTP) catalytic domain and a kinase interaction sequence (KIS) domain. This protein interacts with the plant SnRK AKIN11. Binds starch. Localized in the chloroplast.; STARCH-EXCESS 4 (SEX4); FUNCTIONS IN: protein tyrosine/serine/threonine phosphatase activity, polysaccharide binding; INVO…
Bin: 2.2.2.10	major CHO metabolism.degradation.starch.laforin like phosphoglucan phosphatase (SEX4)
	Id: seq_11333
	(at3g52180 : 93.2) Encodes a plant-specific protein phosphatase that contains a protein tyrosine phosphatase (PTP) catalytic domain and a kinase interaction sequence (KIS) domain. This protein interacts with the plant SnRK AKIN11. Binds starch. Localized in the chloroplast.; STARCH-EXCESS 4 (SEX4); FUNCTIONS IN: protein tyrosine/serine/threonine phosphatase activity, polysaccharide binding; INVOL…
Bin: 2.2.2.10	major CHO metabolism.degradation.starch.laforin like phosphoglucan phosphatase (SEX4)
	Id: seq_39757
	(at3g52180 : 104.0) Encodes a plant-specific protein phosphatase that contains a protein tyrosine phosphatase (PTP) catalytic domain and a kinase interaction sequence (KIS) domain. This protein interacts with the plant SnRK AKIN11. Binds starch. Localized in the chloroplast.; STARCH-EXCESS 4 (SEX4); FUNCTIONS IN: protein tyrosine/serine/threonine phosphatase activity, polysaccharide binding; INVO…
Bin: 2.2.2.10	major CHO metabolism.degradation.starch.laforin like phosphoglucan phosphatase (SEX4)
	Id: seq_43751
	(at3g52180 : 102.0) Encodes a plant-specific protein phosphatase that contains a protein tyrosine phosphatase (PTP) catalytic domain and a kinase interaction sequence (KIS) domain. This protein interacts with the plant SnRK AKIN11. Binds starch. Localized in the chloroplast.; STARCH-EXCESS 4 (SEX4); FUNCTIONS IN: protein tyrosine/serine/threonine phosphatase activity, polysaccharide binding; INVO…
Bin: 2.2.2.9	major CHO metabolism.degradation.starch.limit dextrinase/ pullulanase
	Id: seq_19661
	(at5g04360 : 829.0) Encodes an enzyme thought to be involved in the hydrolysis of the α-1,6 linkages during starch degradation in seed endosperm. However, a knockout mutant of Arabidopsis lacking limit dextrinase has normal rates of starch degradation in the leaf at night, indicating that more than one isoamylases might be involved in this process.; limit dextrinase (LDA); FUNCTIONS IN: limit dex…
Bin: 2.2.2.9	major CHO metabolism.degradation.starch.limit dextrinase/ pullulanase
	Id: seq_40828
	(at5g04360 : 171.0) Encodes an enzyme thought to be involved in the hydrolysis of the α-1,6 linkages during starch degradation in seed endosperm. However, a knockout mutant of Arabidopsis lacking limit dextrinase has normal rates of starch degradation in the leaf at night, indicating that more than one isoamylases might be involved in this process.; limit dextrinase (LDA); FUNCTIONS IN: limit dex…
Bin: 2.2.2.9	major CHO metabolism.degradation.starch.limit dextrinase/ pullulanase
	Id: seq_60215
	(at5g04360 : 168.0) Encodes an enzyme thought to be involved in the hydrolysis of the α-1,6 linkages during starch degradation in seed endosperm. However, a knockout mutant of Arabidopsis lacking limit dextrinase has normal rates of starch degradation in the leaf at night, indicating that more than one isoamylases might be involved in this process.; limit dextrinase (LDA); FUNCTIONS IN: limit dex…
Bin: 2.2.2.9	major CHO metabolism.degradation.starch.limit dextrinase/ pullulanase
	Id: seq_65118
	(at5g04360 : 178.0) Encodes an enzyme thought to be involved in the hydrolysis of the α-1,6 linkages during starch degradation in seed endosperm. However, a knockout mutant of Arabidopsis lacking limit dextrinase has normal rates of starch degradation in the leaf at night, indicating that more than one isoamylases might be involved in this process.; limit dextrinase (LDA); FUNCTIONS IN: limit dex…
Bin: 2.2.2.8	major CHO metabolism.degradation.starch.ISA3
	Id: seq_8766
	(at4g09020 : 500.0) Encodes an isoamylase-like protein. Mutant studies show that the gene is strongly involved in starch breakdown. A GUS-protein fusion product was shown to localize to the surface of chloroplastic structures reminiscent of starch granules. In the mutants, the chloroplastic α-amylase AMY3 is upregulated.; isoamylase 3 (ISA3); FUNCTIONS IN: isoamylase activity, alpha-amylase activ…
Bin: 2.2.2.8	major CHO metabolism.degradation.starch.ISA3
	Id: seq_18936
	(at4g09020 : 197.0) Encodes an isoamylase-like protein. Mutant studies show that the gene is strongly involved in starch breakdown. A GUS-protein fusion product was shown to localize to the surface of chloroplastic structures reminiscent of starch granules. In the mutants, the chloroplastic α-amylase AMY3 is upregulated.; isoamylase 3 (ISA3); FUNCTIONS IN: isoamylase activity, alpha-amylase activ…
Bin: 2.2.2.8	major CHO metabolism.degradation.starch.ISA3
	Id: seq_43129
	(at4g09020 : 209.0) Encodes an isoamylase-like protein. Mutant studies show that the gene is strongly involved in starch breakdown. A GUS-protein fusion product was shown to localize to the surface of chloroplastic structures reminiscent of starch granules. In the mutants, the chloroplastic α-amylase AMY3 is upregulated.; isoamylase 3 (ISA3); FUNCTIONS IN: isoamylase activity, alpha-amylase activ…
Bin: 2.2.2.8	major CHO metabolism.degradation.starch.ISA3
	Id: seq_47515
	(at4g09020 : 300.0) Encodes an isoamylase-like protein. Mutant studies show that the gene is strongly involved in starch breakdown. A GUS-protein fusion product was shown to localize to the surface of chloroplastic structures reminiscent of starch granules. In the mutants, the chloroplastic α-amylase AMY3 is upregulated.; isoamylase 3 (ISA3); FUNCTIONS IN: isoamylase activity, alpha-amylase activ…
Bin: 2.2.2.8	major CHO metabolism.degradation.starch.ISA3
	Id: seq_51859
	(at4g09020 : 302.0) Encodes an isoamylase-like protein. Mutant studies show that the gene is strongly involved in starch breakdown. A GUS-protein fusion product was shown to localize to the surface of chloroplastic structures reminiscent of starch granules. In the mutants, the chloroplastic α-amylase AMY3 is upregulated.; isoamylase 3 (ISA3); FUNCTIONS IN: isoamylase activity, alpha-amylase activ…
Bin: 2.2.2.8	major CHO metabolism.degradation.starch.ISA3
	Id: seq_73090
	(at4g09020 : 117.0) Encodes an isoamylase-like protein. Mutant studies show that the gene is strongly involved in starch breakdown. A GUS-protein fusion product was shown to localize to the surface of chloroplastic structures reminiscent of starch granules. In the mutants, the chloroplastic α-amylase AMY3 is upregulated.; isoamylase 3 (ISA3); FUNCTIONS IN: isoamylase activity, alpha-amylase activ…
Bin: 2.2.2.8	major CHO metabolism.degradation.starch.ISA3
	Id: seq_81789
	(at4g09020 : 166.0) Encodes an isoamylase-like protein. Mutant studies show that the gene is strongly involved in starch breakdown. A GUS-protein fusion product was shown to localize to the surface of chloroplastic structures reminiscent of starch granules. In the mutants, the chloroplastic α-amylase AMY3 is upregulated.; isoamylase 3 (ISA3); FUNCTIONS IN: isoamylase activity, alpha-amylase activ…
Bin: 2.2.2.6	major CHO metabolism.degradation.starch.transporter
	Id: seq_761
	(p49133|tpt_maize : 123.0) Triose phosphate/phosphate translocator, chloroplast precursor (cTPT) - Zea mays (Maize) & (at5g46110 : 113.0) mutant has Altered acclimation responses; Chloroplast Triose Phosphate Translocator; ACCLIMATION OF PHOTOSYNTHESIS TO ENVIRONMENT 2 (APE2); FUNCTIONS IN: antiporter activity; INVOLVED IN: transport; LOCATED IN: chloroplast, membrane; EXPRESSED IN: 24 plant stru…
Bin: 2.2.2.6	major CHO metabolism.degradation.starch.transporter
	Id: seq_992
	(p11869|tpt_spiol : 443.0) Triose phosphate/phosphate translocator, chloroplast precursor (cTPT) (p36) (E29) - Spinacia oleracea (Spinach) & (at5g46110 : 442.0) mutant has Altered acclimation responses; Chloroplast Triose Phosphate Translocator; ACCLIMATION OF PHOTOSYNTHESIS TO ENVIRONMENT 2 (APE2); FUNCTIONS IN: antiporter activity; INVOLVED IN: transport; LOCATED IN: chloroplast, membrane; EXPR…
Bin: 2.2.2.6	major CHO metabolism.degradation.starch.transporter
	Id: seq_1088
	(at5g17520 : 486.0) Encodes a maltose transporter that is expressed in leaves and roots. Mutations at the MEX1 locus cause accumulation of both starch and maltose in leaves, with maltose levels at least 40 times higher than that of wild-type. This gene encodes a protein located in the chloroplast envelope.; ROOT CAP 1 (RCP1); FUNCTIONS IN: maltose transmembrane transporter activity; INVOLVED IN: …
Bin: 2.2.2.6	major CHO metabolism.degradation.starch.transporter
	Id: seq_1096
	(at5g16150 : 704.0) Encodes a putative plastidic glucose transporter.; plastidic GLC translocator (PGLCT); FUNCTIONS IN: carbohydrate transmembrane transporter activity, sugar:hydrogen symporter activity; INVOLVED IN: response to trehalose stimulus; LOCATED IN: membrane; EXPRESSED IN: 24 plant structures; EXPRESSED DURING: 14 growth stages; CONTAINS InterPro DOMAIN/s: Sugar transporter, conserved…
Bin: 2.2.2.6	major CHO metabolism.degradation.starch.transporter
	Id: seq_16036
	(p49133|tpt_maize : 456.0) Triose phosphate/phosphate translocator, chloroplast precursor (cTPT) - Zea mays (Maize) & (at5g46110 : 449.0) mutant has Altered acclimation responses; Chloroplast Triose Phosphate Translocator; ACCLIMATION OF PHOTOSYNTHESIS TO ENVIRONMENT 2 (APE2); FUNCTIONS IN: antiporter activity; INVOLVED IN: transport; LOCATED IN: chloroplast, membrane; EXPRESSED IN: 24 plant stru…
Bin: 2.2.2.6	major CHO metabolism.degradation.starch.transporter
	Id: seq_16474
	(q7xtq5|mex1_orysa : 95.9) Maltose excess protein 1-like, chloroplast precursor - Oryza sativa (Rice) & (at5g17523 : 95.5) Similar to Maltose excess protein 1; FUNCTIONS IN: molecular_function unknown; INVOLVED IN: biological_process unknown; LOCATED IN: chloroplast; BEST Arabidopsis thaliana protein match is: root cap 1 (RCP1) (TAIR:AT5G17520.1); Has 30201 Blast hits to 17322 proteins in 780 spe…
Bin: 2.2.2.6	major CHO metabolism.degradation.starch.transporter
	Id: seq_19275
	(at5g17520 : 95.9) Encodes a maltose transporter that is expressed in leaves and roots. Mutations at the MEX1 locus cause accumulation of both starch and maltose in leaves, with maltose levels at least 40 times higher than that of wild-type. This gene encodes a protein located in the chloroplast envelope.; ROOT CAP 1 (RCP1); FUNCTIONS IN: maltose transmembrane transporter activity; INVOLVED IN: i…
Bin: 2.2.2.6	major CHO metabolism.degradation.starch.transporter
	Id: seq_36240
	(p49133|tpt_maize : 94.7) Triose phosphate/phosphate translocator, chloroplast precursor (cTPT) - Zea mays (Maize) & (at5g46110 : 93.6) mutant has Altered acclimation responses; Chloroplast Triose Phosphate Translocator; ACCLIMATION OF PHOTOSYNTHESIS TO ENVIRONMENT 2 (APE2); FUNCTIONS IN: antiporter activity; INVOLVED IN: transport; LOCATED IN: chloroplast, membrane; EXPRESSED IN: 24 plant struct…
Bin: 2.2.2.6	major CHO metabolism.degradation.starch.transporter
	Id: seq_37701
	(at5g16150 : 203.0) Encodes a putative plastidic glucose transporter.; plastidic GLC translocator (PGLCT); FUNCTIONS IN: carbohydrate transmembrane transporter activity, sugar:hydrogen symporter activity; INVOLVED IN: response to trehalose stimulus; LOCATED IN: membrane; EXPRESSED IN: 24 plant structures; EXPRESSED DURING: 14 growth stages; CONTAINS InterPro DOMAIN/s: Sugar transporter, conserved…
Bin: 2.2.2.6	major CHO metabolism.degradation.starch.transporter
	Id: seq_40364
	(p11869|tpt_spiol : 232.0) Triose phosphate/phosphate translocator, chloroplast precursor (cTPT) (p36) (E29) - Spinacia oleracea (Spinach) & (at5g46110 : 227.0) mutant has Altered acclimation responses; Chloroplast Triose Phosphate Translocator; ACCLIMATION OF PHOTOSYNTHESIS TO ENVIRONMENT 2 (APE2); FUNCTIONS IN: antiporter activity; INVOLVED IN: transport; LOCATED IN: chloroplast, membrane; EXPR…
Bin: 2.2.2.6	major CHO metabolism.degradation.starch.transporter
	Id: seq_53911
	(at5g17520 : 95.1) Encodes a maltose transporter that is expressed in leaves and roots. Mutations at the MEX1 locus cause accumulation of both starch and maltose in leaves, with maltose levels at least 40 times higher than that of wild-type. This gene encodes a protein located in the chloroplast envelope.; ROOT CAP 1 (RCP1); FUNCTIONS IN: maltose transmembrane transporter activity; INVOLVED IN: i…
Bin: 2.2.2.4	major CHO metabolism.degradation.starch.D enzyme
	Id: seq_4249
	(at2g40840 : 1457.0) Encodes a cytosolic protein with transglucosidase and amylomaltase activity. It is an essential component of the pathway from starch to sucrose and cellular metabolism in leaves at night. The protein binds to heteroglycans and utilizes glucose, mannose and xylose as acceptors. Fucose and galactose can also act as acceptors but less efficiently than the previous three. It was …
Bin: 2.2.2.4	major CHO metabolism.degradation.starch.D enzyme
	Id: seq_7136
	(at5g01260 : 169.0) Carbohydrate-binding-like fold; FUNCTIONS IN: carbohydrate binding, catalytic activity; INVOLVED IN: carbohydrate metabolic process; LOCATED IN: cellular_component unknown; EXPRESSED IN: 21 plant structures; EXPRESSED DURING: 13 growth stages; CONTAINS InterPro DOMAIN/s: Immunoglobulin-like fold (InterPro:IPR013783), Carbohydrate-binding-like fold (InterPro:IPR013784), Glycosi…
Bin: 2.2.2.4	major CHO metabolism.degradation.starch.D enzyme
	Id: seq_9258
	(q06801|dpep_soltu : 215.0) 4-alpha-glucanotransferase, chloroplast precursor (EC 2.4.1.25) (Amylomaltase) (Disproportionating enzyme) (D-enzyme) - Solanum tuberosum (Potato) & (at5g64860 : 210.0) Encodes a maltotriose-metabolizing enzyme with chloroplastic α-1,4-glucanotransferase activity. Mutant has altered starch degradation.; disproportionating enzyme (DPE1); FUNCTIONS IN: 4-alpha-glucanotra…
Bin: 2.2.2.4	major CHO metabolism.degradation.starch.D enzyme
	Id: seq_10537
	(at2g40840 : 384.0) Encodes a cytosolic protein with transglucosidase and amylomaltase activity. It is an essential component of the pathway from starch to sucrose and cellular metabolism in leaves at night. The protein binds to heteroglycans and utilizes glucose, mannose and xylose as acceptors. Fucose and galactose can also act as acceptors but less efficiently than the previous three. It was a…
Bin: 2.2.2.4	major CHO metabolism.degradation.starch.D enzyme
	Id: seq_13577
	(at2g40840 : 234.0) Encodes a cytosolic protein with transglucosidase and amylomaltase activity. It is an essential component of the pathway from starch to sucrose and cellular metabolism in leaves at night. The protein binds to heteroglycans and utilizes glucose, mannose and xylose as acceptors. Fucose and galactose can also act as acceptors but less efficiently than the previous three. It was a…
Bin: 2.2.2.4	major CHO metabolism.degradation.starch.D enzyme
	Id: seq_19073
	(q06801|dpep_soltu : 322.0) 4-alpha-glucanotransferase, chloroplast precursor (EC 2.4.1.25) (Amylomaltase) (Disproportionating enzyme) (D-enzyme) - Solanum tuberosum (Potato) & (at5g64860 : 316.0) Encodes a maltotriose-metabolizing enzyme with chloroplastic α-1,4-glucanotransferase activity. Mutant has altered starch degradation.; disproportionating enzyme (DPE1); FUNCTIONS IN: 4-alpha-glucanotra…
Bin: 2.2.2.4	major CHO metabolism.degradation.starch.D enzyme
	Id: seq_25559
	(at5g64860 : 155.0) Encodes a maltotriose-metabolizing enzyme with chloroplastic α-1,4-glucanotransferase activity. Mutant has altered starch degradation.; disproportionating enzyme (DPE1); FUNCTIONS IN: 4-alpha-glucanotransferase activity, cation binding, catalytic activity; INVOLVED IN: response to cold, starch catabolic process; LOCATED IN: chloroplast; EXPRESSED IN: 23 plant structures; EXPRE…
Bin: 2.2.2.4	major CHO metabolism.degradation.starch.D enzyme
	Id: seq_25832
	(at5g64860 : 91.3) Encodes a maltotriose-metabolizing enzyme with chloroplastic α-1,4-glucanotransferase activity. Mutant has altered starch degradation.; disproportionating enzyme (DPE1); FUNCTIONS IN: 4-alpha-glucanotransferase activity, cation binding, catalytic activity; INVOLVED IN: response to cold, starch catabolic process; LOCATED IN: chloroplast; EXPRESSED IN: 23 plant structures; EXPRES…
Bin: 2.2.2.4	major CHO metabolism.degradation.starch.D enzyme
	Id: seq_32302
	(at2g40840 : 126.0) Encodes a cytosolic protein with transglucosidase and amylomaltase activity. It is an essential component of the pathway from starch to sucrose and cellular metabolism in leaves at night. The protein binds to heteroglycans and utilizes glucose, mannose and xylose as acceptors. Fucose and galactose can also act as acceptors but less efficiently than the previous three. It was a…
Bin: 2.2.2.4	major CHO metabolism.degradation.starch.D enzyme
	Id: seq_34029
	(at2g40840 : 138.0) Encodes a cytosolic protein with transglucosidase and amylomaltase activity. It is an essential component of the pathway from starch to sucrose and cellular metabolism in leaves at night. The protein binds to heteroglycans and utilizes glucose, mannose and xylose as acceptors. Fucose and galactose can also act as acceptors but less efficiently than the previous three. It was a…
Bin: 2.2.2.4	major CHO metabolism.degradation.starch.D enzyme
	Id: seq_38417
	(at2g40840 : 134.0) Encodes a cytosolic protein with transglucosidase and amylomaltase activity. It is an essential component of the pathway from starch to sucrose and cellular metabolism in leaves at night. The protein binds to heteroglycans and utilizes glucose, mannose and xylose as acceptors. Fucose and galactose can also act as acceptors but less efficiently than the previous three. It was a…
Bin: 2.2.2.4	major CHO metabolism.degradation.starch.D enzyme
	Id: seq_46657
	(at2g40840 : 138.0) Encodes a cytosolic protein with transglucosidase and amylomaltase activity. It is an essential component of the pathway from starch to sucrose and cellular metabolism in leaves at night. The protein binds to heteroglycans and utilizes glucose, mannose and xylose as acceptors. Fucose and galactose can also act as acceptors but less efficiently than the previous three. It was a…
Bin: 2.2.2.4	major CHO metabolism.degradation.starch.D enzyme
	Id: seq_49429
	(at5g64860 : 90.1) Encodes a maltotriose-metabolizing enzyme with chloroplastic α-1,4-glucanotransferase activity. Mutant has altered starch degradation.; disproportionating enzyme (DPE1); FUNCTIONS IN: 4-alpha-glucanotransferase activity, cation binding, catalytic activity; INVOLVED IN: response to cold, starch catabolic process; LOCATED IN: chloroplast; EXPRESSED IN: 23 plant structures; EXPRES…
Bin: 2.2.2.4	major CHO metabolism.degradation.starch.D enzyme
	Id: seq_50604
	(at2g40840 : 128.0) Encodes a cytosolic protein with transglucosidase and amylomaltase activity. It is an essential component of the pathway from starch to sucrose and cellular metabolism in leaves at night. The protein binds to heteroglycans and utilizes glucose, mannose and xylose as acceptors. Fucose and galactose can also act as acceptors but less efficiently than the previous three. It was a…
Bin: 2.2.2.4	major CHO metabolism.degradation.starch.D enzyme
	Id: seq_54074
	(at2g40840 : 101.0) Encodes a cytosolic protein with transglucosidase and amylomaltase activity. It is an essential component of the pathway from starch to sucrose and cellular metabolism in leaves at night. The protein binds to heteroglycans and utilizes glucose, mannose and xylose as acceptors. Fucose and galactose can also act as acceptors but less efficiently than the previous three. It was a…
Bin: 2.2.2.4	major CHO metabolism.degradation.starch.D enzyme
	Id: seq_61688
	(at5g01260 : 106.0) Carbohydrate-binding-like fold; FUNCTIONS IN: carbohydrate binding, catalytic activity; INVOLVED IN: carbohydrate metabolic process; LOCATED IN: cellular_component unknown; EXPRESSED IN: 21 plant structures; EXPRESSED DURING: 13 growth stages; CONTAINS InterPro DOMAIN/s: Immunoglobulin-like fold (InterPro:IPR013783), Carbohydrate-binding-like fold (InterPro:IPR013784), Glycosi…
Bin: 2.2.2.4	major CHO metabolism.degradation.starch.D enzyme
	Id: seq_75860
	(q06801|dpep_soltu : 190.0) 4-alpha-glucanotransferase, chloroplast precursor (EC 2.4.1.25) (Amylomaltase) (Disproportionating enzyme) (D-enzyme) - Solanum tuberosum (Potato) & (at5g64860 : 160.0) Encodes a maltotriose-metabolizing enzyme with chloroplastic α-1,4-glucanotransferase activity. Mutant has altered starch degradation.; disproportionating enzyme (DPE1); FUNCTIONS IN: 4-alpha-glucanotra…
Bin: 2.2.2.4	major CHO metabolism.degradation.starch.D enzyme
	Id: seq_77921
	(q06801|dpep_soltu : 101.0) 4-alpha-glucanotransferase, chloroplast precursor (EC 2.4.1.25) (Amylomaltase) (Disproportionating enzyme) (D-enzyme) - Solanum tuberosum (Potato) & (at5g64860 : 100.0) Encodes a maltotriose-metabolizing enzyme with chloroplastic α-1,4-glucanotransferase activity. Mutant has altered starch degradation.; disproportionating enzyme (DPE1); FUNCTIONS IN: 4-alpha-glucanotra…
Bin: 2.2.2.4	major CHO metabolism.degradation.starch.D enzyme
	Id: seq_99529
	(at2g40840 : 124.0) Encodes a cytosolic protein with transglucosidase and amylomaltase activity. It is an essential component of the pathway from starch to sucrose and cellular metabolism in leaves at night. The protein binds to heteroglycans and utilizes glucose, mannose and xylose as acceptors. Fucose and galactose can also act as acceptors but less efficiently than the previous three. It was a…
Bin: 2.2.2.4	major CHO metabolism.degradation.starch.D enzyme
	Id: seq_108853
	(at5g64860 : 80.9) Encodes a maltotriose-metabolizing enzyme with chloroplastic α-1,4-glucanotransferase activity. Mutant has altered starch degradation.; disproportionating enzyme (DPE1); FUNCTIONS IN: 4-alpha-glucanotransferase activity, cation binding, catalytic activity; INVOLVED IN: response to cold, starch catabolic process; LOCATED IN: chloroplast; EXPRESSED IN: 23 plant structures; EXPRES…
Bin: 2.2.2.4	major CHO metabolism.degradation.starch.D enzyme
	Id: seq_109822
	(at2g40840 : 85.5) Encodes a cytosolic protein with transglucosidase and amylomaltase activity. It is an essential component of the pathway from starch to sucrose and cellular metabolism in leaves at night. The protein binds to heteroglycans and utilizes glucose, mannose and xylose as acceptors. Fucose and galactose can also act as acceptors but less efficiently than the previous three. It was al…
Bin: 2.2.2.4	major CHO metabolism.degradation.starch.D enzyme
	Id: seq_110545
	(q06801|dpep_soltu : 91.7) 4-alpha-glucanotransferase, chloroplast precursor (EC 2.4.1.25) (Amylomaltase) (Disproportionating enzyme) (D-enzyme) - Solanum tuberosum (Potato) & (at5g64860 : 90.9) Encodes a maltotriose-metabolizing enzyme with chloroplastic α-1,4-glucanotransferase activity. Mutant has altered starch degradation.; disproportionating enzyme (DPE1); FUNCTIONS IN: 4-alpha-glucanotrans…
Bin: 2.2.2.4	major CHO metabolism.degradation.starch.D enzyme
	Id: seq_112300
	(at5g64860 : 116.0) Encodes a maltotriose-metabolizing enzyme with chloroplastic α-1,4-glucanotransferase activity. Mutant has altered starch degradation.; disproportionating enzyme (DPE1); FUNCTIONS IN: 4-alpha-glucanotransferase activity, cation binding, catalytic activity; INVOLVED IN: response to cold, starch catabolic process; LOCATED IN: chloroplast; EXPRESSED IN: 23 plant structures; EXPRE…
Bin: 2.2.2.3	major CHO metabolism.degradation.starch.glucan water dikinase
	Id: seq_1798
	(q9awa5|gwd1_soltu : 1886.0) Alpha-glucan water dikinase, chloroplast precursor (EC 2.7.9.4) (EC 2.7.13.3) (Starch-related R1 protein) - Solanum tuberosum (Potato) & (at1g10760 : 1646.0) Encodes an α-glucan, water dikinase required for starch degradation. Involved in cold-induced freezing tolerance. Mutations that eliminate the GWD protein or affect the dikinase domain of the enzyme dramatically …
Bin: 2.2.2.3	major CHO metabolism.degradation.starch.glucan water dikinase
	Id: seq_1974
	(at5g26570 : 719.0) chloroplastidic phosphoglucan, water dikinase (PWD) which is required for normal degradation of leaf starch in Arabidopsis. NMR analysis of the mutants, suggests that the gene is specifically involved in the phosphorylation of the glucosyl residues of starch at the C3 position.; PHOSPHOGLUCAN WATER DIKINASE (PWD); FUNCTIONS IN: carbohydrate kinase activity, catalytic activity,…
Bin: 2.2.2.3	major CHO metabolism.degradation.starch.glucan water dikinase
	Id: seq_6623
	(at5g26570 : 304.0) chloroplastidic phosphoglucan, water dikinase (PWD) which is required for normal degradation of leaf starch in Arabidopsis. NMR analysis of the mutants, suggests that the gene is specifically involved in the phosphorylation of the glucosyl residues of starch at the C3 position.; PHOSPHOGLUCAN WATER DIKINASE (PWD); FUNCTIONS IN: carbohydrate kinase activity, catalytic activity,…
Bin: 2.2.2.3	major CHO metabolism.degradation.starch.glucan water dikinase
	Id: seq_9848
	(q9awa5|gwd1_soltu : 289.0) Alpha-glucan water dikinase, chloroplast precursor (EC 2.7.9.4) (EC 2.7.13.3) (Starch-related R1 protein) - Solanum tuberosum (Potato) & (at1g10760 : 274.0) Encodes an α-glucan, water dikinase required for starch degradation. Involved in cold-induced freezing tolerance. Mutations that eliminate the GWD protein or affect the dikinase domain of the enzyme dramatically re…
Bin: 2.2.2.3	major CHO metabolism.degradation.starch.glucan water dikinase
	Id: seq_12611
	(at1g10760 : 80.1) Encodes an α-glucan, water dikinase required for starch degradation. Involved in cold-induced freezing tolerance. Mutations that eliminate the GWD protein or affect the dikinase domain of the enzyme dramatically reduce both the amount of phosphate in the amylopectin and the rate of starch degradation. Mature leaves of these mutants accumulate amounts of starch up to seven times…
Bin: 2.2.2.3	major CHO metabolism.degradation.starch.glucan water dikinase
	Id: seq_15726
	(at5g26570 : 527.0) chloroplastidic phosphoglucan, water dikinase (PWD) which is required for normal degradation of leaf starch in Arabidopsis. NMR analysis of the mutants, suggests that the gene is specifically involved in the phosphorylation of the glucosyl residues of starch at the C3 position.; PHOSPHOGLUCAN WATER DIKINASE (PWD); FUNCTIONS IN: carbohydrate kinase activity, catalytic activity,…
Bin: 2.2.2.3	major CHO metabolism.degradation.starch.glucan water dikinase
	Id: seq_16497
	(at5g26570 : 201.0) chloroplastidic phosphoglucan, water dikinase (PWD) which is required for normal degradation of leaf starch in Arabidopsis. NMR analysis of the mutants, suggests that the gene is specifically involved in the phosphorylation of the glucosyl residues of starch at the C3 position.; PHOSPHOGLUCAN WATER DIKINASE (PWD); FUNCTIONS IN: carbohydrate kinase activity, catalytic activity,…
Bin: 2.2.2.3	major CHO metabolism.degradation.starch.glucan water dikinase
	Id: seq_26336
	(at1g10760 : 213.0) Encodes an α-glucan, water dikinase required for starch degradation. Involved in cold-induced freezing tolerance. Mutations that eliminate the GWD protein or affect the dikinase domain of the enzyme dramatically reduce both the amount of phosphate in the amylopectin and the rate of starch degradation. Mature leaves of these mutants accumulate amounts of starch up to seven time…
Bin: 2.2.2.3	major CHO metabolism.degradation.starch.glucan water dikinase
	Id: seq_30305
	(at1g10760 : 238.0) Encodes an α-glucan, water dikinase required for starch degradation. Involved in cold-induced freezing tolerance. Mutations that eliminate the GWD protein or affect the dikinase domain of the enzyme dramatically reduce both the amount of phosphate in the amylopectin and the rate of starch degradation. Mature leaves of these mutants accumulate amounts of starch up to seven time…
Bin: 2.2.2.3	major CHO metabolism.degradation.starch.glucan water dikinase
	Id: seq_34965
	(q9awa5|gwd1_soltu : 207.0) Alpha-glucan water dikinase, chloroplast precursor (EC 2.7.9.4) (EC 2.7.13.3) (Starch-related R1 protein) - Solanum tuberosum (Potato) & (at1g10760 : 199.0) Encodes an α-glucan, water dikinase required for starch degradation. Involved in cold-induced freezing tolerance. Mutations that eliminate the GWD protein or affect the dikinase domain of the enzyme dramatically re…
Bin: 2.2.2.3	major CHO metabolism.degradation.starch.glucan water dikinase
	Id: seq_37259
	(at4g24450 : 278.0) "phosphoglucan, water dikinase" (PWD); FUNCTIONS IN: kinase activity, ATP binding; INVOLVED IN: phosphorylation; LOCATED IN: chloroplast envelope; EXPRESSED IN: 22 plant structures; EXPRESSED DURING: 14 growth stages; CONTAINS InterPro DOMAIN/s: Pyruvate phosphate dikinase, PEP/pyruvate-binding (InterPro:IPR002192); BEST Arabidopsis thaliana protein match is: Pyruvate phosphat…
Bin: 2.2.2.3	major CHO metabolism.degradation.starch.glucan water dikinase
	Id: seq_38614
	(at5g26570 : 235.0) chloroplastidic phosphoglucan, water dikinase (PWD) which is required for normal degradation of leaf starch in Arabidopsis. NMR analysis of the mutants, suggests that the gene is specifically involved in the phosphorylation of the glucosyl residues of starch at the C3 position.; PHOSPHOGLUCAN WATER DIKINASE (PWD); FUNCTIONS IN: carbohydrate kinase activity, catalytic activity,…
Bin: 2.2.2.3	major CHO metabolism.degradation.starch.glucan water dikinase
	Id: seq_41663
	(at4g24450 : 465.0) "phosphoglucan, water dikinase" (PWD); FUNCTIONS IN: kinase activity, ATP binding; INVOLVED IN: phosphorylation; LOCATED IN: chloroplast envelope; EXPRESSED IN: 22 plant structures; EXPRESSED DURING: 14 growth stages; CONTAINS InterPro DOMAIN/s: Pyruvate phosphate dikinase, PEP/pyruvate-binding (InterPro:IPR002192); BEST Arabidopsis thaliana protein match is: Pyruvate phosphat…
Bin: 2.2.2.3	major CHO metabolism.degradation.starch.glucan water dikinase
	Id: seq_46642
	(at4g24450 : 321.0) "phosphoglucan, water dikinase" (PWD); FUNCTIONS IN: kinase activity, ATP binding; INVOLVED IN: phosphorylation; LOCATED IN: chloroplast envelope; EXPRESSED IN: 22 plant structures; EXPRESSED DURING: 14 growth stages; CONTAINS InterPro DOMAIN/s: Pyruvate phosphate dikinase, PEP/pyruvate-binding (InterPro:IPR002192); BEST Arabidopsis thaliana protein match is: Pyruvate phosphat…
Bin: 2.2.2.3	major CHO metabolism.degradation.starch.glucan water dikinase
	Id: seq_58223
	(at4g24450 : 128.0) "phosphoglucan, water dikinase" (PWD); FUNCTIONS IN: kinase activity, ATP binding; INVOLVED IN: phosphorylation; LOCATED IN: chloroplast envelope; EXPRESSED IN: 22 plant structures; EXPRESSED DURING: 14 growth stages; CONTAINS InterPro DOMAIN/s: Pyruvate phosphate dikinase, PEP/pyruvate-binding (InterPro:IPR002192); BEST Arabidopsis thaliana protein match is: Pyruvate phosphat…
Bin: 2.2.2.3	major CHO metabolism.degradation.starch.glucan water dikinase
	Id: seq_59337
	(at4g24450 : 201.0) "phosphoglucan, water dikinase" (PWD); FUNCTIONS IN: kinase activity, ATP binding; INVOLVED IN: phosphorylation; LOCATED IN: chloroplast envelope; EXPRESSED IN: 22 plant structures; EXPRESSED DURING: 14 growth stages; CONTAINS InterPro DOMAIN/s: Pyruvate phosphate dikinase, PEP/pyruvate-binding (InterPro:IPR002192); BEST Arabidopsis thaliana protein match is: Pyruvate phosphat…
Bin: 2.2.2.3	major CHO metabolism.degradation.starch.glucan water dikinase
	Id: seq_61957
	(at5g26570 : 100.0) chloroplastidic phosphoglucan, water dikinase (PWD) which is required for normal degradation of leaf starch in Arabidopsis. NMR analysis of the mutants, suggests that the gene is specifically involved in the phosphorylation of the glucosyl residues of starch at the C3 position.; PHOSPHOGLUCAN WATER DIKINASE (PWD); FUNCTIONS IN: carbohydrate kinase activity, catalytic activity,…
Bin: 2.2.2.3	major CHO metabolism.degradation.starch.glucan water dikinase
	Id: seq_63811
	(at5g26570 : 121.0) chloroplastidic phosphoglucan, water dikinase (PWD) which is required for normal degradation of leaf starch in Arabidopsis. NMR analysis of the mutants, suggests that the gene is specifically involved in the phosphorylation of the glucosyl residues of starch at the C3 position.; PHOSPHOGLUCAN WATER DIKINASE (PWD); FUNCTIONS IN: carbohydrate kinase activity, catalytic activity,…
Bin: 2.2.2.3	major CHO metabolism.degradation.starch.glucan water dikinase
	Id: seq_66129
	(at4g24450 : 168.0) "phosphoglucan, water dikinase" (PWD); FUNCTIONS IN: kinase activity, ATP binding; INVOLVED IN: phosphorylation; LOCATED IN: chloroplast envelope; EXPRESSED IN: 22 plant structures; EXPRESSED DURING: 14 growth stages; CONTAINS InterPro DOMAIN/s: Pyruvate phosphate dikinase, PEP/pyruvate-binding (InterPro:IPR002192); BEST Arabidopsis thaliana protein match is: Pyruvate phosphat…
Bin: 2.2.2.3	major CHO metabolism.degradation.starch.glucan water dikinase
	Id: seq_66465
	(q9awa5|gwd1_soltu : 138.0) Alpha-glucan water dikinase, chloroplast precursor (EC 2.7.9.4) (EC 2.7.13.3) (Starch-related R1 protein) - Solanum tuberosum (Potato) & (at1g10760 : 132.0) Encodes an α-glucan, water dikinase required for starch degradation. Involved in cold-induced freezing tolerance. Mutations that eliminate the GWD protein or affect the dikinase domain of the enzyme dramatically re…
Bin: 2.2.2.3	major CHO metabolism.degradation.starch.glucan water dikinase
	Id: seq_72791
	(q9awa5|gwd1_soltu : 136.0) Alpha-glucan water dikinase, chloroplast precursor (EC 2.7.9.4) (EC 2.7.13.3) (Starch-related R1 protein) - Solanum tuberosum (Potato) & (at1g10760 : 135.0) Encodes an α-glucan, water dikinase required for starch degradation. Involved in cold-induced freezing tolerance. Mutations that eliminate the GWD protein or affect the dikinase domain of the enzyme dramatically re…
Bin: 2.2.2.3	major CHO metabolism.degradation.starch.glucan water dikinase
	Id: seq_73878
	(at5g26570 : 83.2) chloroplastidic phosphoglucan, water dikinase (PWD) which is required for normal degradation of leaf starch in Arabidopsis. NMR analysis of the mutants, suggests that the gene is specifically involved in the phosphorylation of the glucosyl residues of starch at the C3 position.; PHOSPHOGLUCAN WATER DIKINASE (PWD); FUNCTIONS IN: carbohydrate kinase activity, catalytic activity, …
Bin: 2.2.2.3	major CHO metabolism.degradation.starch.glucan water dikinase
	Id: seq_92329
	(at5g26570 : 127.0) chloroplastidic phosphoglucan, water dikinase (PWD) which is required for normal degradation of leaf starch in Arabidopsis. NMR analysis of the mutants, suggests that the gene is specifically involved in the phosphorylation of the glucosyl residues of starch at the C3 position.; PHOSPHOGLUCAN WATER DIKINASE (PWD); FUNCTIONS IN: carbohydrate kinase activity, catalytic activity,…
Bin: 2.2.2.3	major CHO metabolism.degradation.starch.glucan water dikinase
	Id: seq_97068
	(at4g24450 : 135.0) "phosphoglucan, water dikinase" (PWD); FUNCTIONS IN: kinase activity, ATP binding; INVOLVED IN: phosphorylation; LOCATED IN: chloroplast envelope; EXPRESSED IN: 22 plant structures; EXPRESSED DURING: 14 growth stages; CONTAINS InterPro DOMAIN/s: Pyruvate phosphate dikinase, PEP/pyruvate-binding (InterPro:IPR002192); BEST Arabidopsis thaliana protein match is: Pyruvate phosphat…
Bin: 2.2.2.2	major CHO metabolism.degradation.starch.starch phosphorylase
	Id: seq_208
	(ipr000811 : 1500.0) Glycosyl transferase, family 35 & (p53537|phsh_vicfa : 1441.0) Alpha-glucan phosphorylase, H isozyme (EC 2.4.1.1) (Starch phosphorylase H) - Vicia faba (Broad bean) & (at3g46970 : 1407.0) Encodes a cytosolic alpha-glucan phosphorylase. In vitro, the enzyme has a preference for branched polysaccharides, such as glycogen.; alpha-glucan phosphorylase 2 (PHS2); FUNCTIONS IN: phos…
Bin: 2.2.2.2	major CHO metabolism.degradation.starch.starch phosphorylase
	Id: seq_466
	(p53536|phsl_vicfa : 1484.0) Alpha-1,4 glucan phosphorylase L isozyme, chloroplast precursor (EC 2.4.1.1) (Starch phosphorylase L) - Vicia faba (Broad bean) & (at3g29320 : 1404.0) Encodes a plastidic alpha-glucan phosphorylase. In vitro, the enzyme has a preference for maltooligosaccharides, such as maltoheptaose.; Glycosyl transferase, family 35; FUNCTIONS IN: phosphorylase activity, transferase…
Bin: 2.2.2.2	major CHO metabolism.degradation.starch.starch phosphorylase
	Id: seq_7219
	(p53535|phsl2_soltu : 1483.0) Alpha-1,4 glucan phosphorylase L-2 isozyme, chloroplast precursor (EC 2.4.1.1) (Starch phosphorylase L-2) - Solanum tuberosum (Potato) & (at3g29320 : 1384.0) Encodes a plastidic alpha-glucan phosphorylase. In vitro, the enzyme has a preference for maltooligosaccharides, such as maltoheptaose.; Glycosyl transferase, family 35; FUNCTIONS IN: phosphorylase activity, tra…
Bin: 2.2.2.2	major CHO metabolism.degradation.starch.starch phosphorylase
	Id: seq_9205
	(p53537|phsh_vicfa : 488.0) Alpha-glucan phosphorylase, H isozyme (EC 2.4.1.1) (Starch phosphorylase H) - Vicia faba (Broad bean) & (at3g46970 : 446.0) Encodes a cytosolic alpha-glucan phosphorylase. In vitro, the enzyme has a preference for branched polysaccharides, such as glycogen.; alpha-glucan phosphorylase 2 (PHS2); FUNCTIONS IN: phosphorylase activity, transferase activity, transferring gl…
Bin: 2.2.2.2	major CHO metabolism.degradation.starch.starch phosphorylase
	Id: seq_13879
	(p27598|phsl_ipoba : 136.0) Alpha-1,4 glucan phosphorylase L isozyme, chloroplast precursor (EC 2.4.1.1) (Starch phosphorylase L) - Ipomoea batatas (Sweet potato) (Batate) & (at3g29320 : 134.0) Encodes a plastidic alpha-glucan phosphorylase. In vitro, the enzyme has a preference for maltooligosaccharides, such as maltoheptaose.; Glycosyl transferase, family 35; FUNCTIONS IN: phosphorylase activit…
Bin: 2.2.2.2	major CHO metabolism.degradation.starch.starch phosphorylase
	Id: seq_14728
	(p53537|phsh_vicfa : 166.0) Alpha-glucan phosphorylase, H isozyme (EC 2.4.1.1) (Starch phosphorylase H) - Vicia faba (Broad bean) & (at3g46970 : 148.0) Encodes a cytosolic alpha-glucan phosphorylase. In vitro, the enzyme has a preference for branched polysaccharides, such as glycogen.; alpha-glucan phosphorylase 2 (PHS2); FUNCTIONS IN: phosphorylase activity, transferase activity, transferring gl…
Bin: 2.2.2.2	major CHO metabolism.degradation.starch.starch phosphorylase
	Id: seq_18283
	(p32811|phsh_soltu : 230.0) Alpha-glucan phosphorylase, H isozyme (EC 2.4.1.1) (Starch phosphorylase H) - Solanum tuberosum (Potato) & (at3g46970 : 224.0) Encodes a cytosolic alpha-glucan phosphorylase. In vitro, the enzyme has a preference for branched polysaccharides, such as glycogen.; alpha-glucan phosphorylase 2 (PHS2); FUNCTIONS IN: phosphorylase activity, transferase activity, transferring…
Bin: 2.2.2.2	major CHO metabolism.degradation.starch.starch phosphorylase
	Id: seq_18488
	(p53535|phsl2_soltu : 166.0) Alpha-1,4 glucan phosphorylase L-2 isozyme, chloroplast precursor (EC 2.4.1.1) (Starch phosphorylase L-2) - Solanum tuberosum (Potato) & (at3g29320 : 144.0) Encodes a plastidic alpha-glucan phosphorylase. In vitro, the enzyme has a preference for maltooligosaccharides, such as maltoheptaose.; Glycosyl transferase, family 35; FUNCTIONS IN: phosphorylase activity, trans…
Bin: 2.2.2.2	major CHO metabolism.degradation.starch.starch phosphorylase
	Id: seq_20133
	(p27598|phsl_ipoba : 288.0) Alpha-1,4 glucan phosphorylase L isozyme, chloroplast precursor (EC 2.4.1.1) (Starch phosphorylase L) - Ipomoea batatas (Sweet potato) (Batate) & (at3g29320 : 271.0) Encodes a plastidic alpha-glucan phosphorylase. In vitro, the enzyme has a preference for maltooligosaccharides, such as maltoheptaose.; Glycosyl transferase, family 35; FUNCTIONS IN: phosphorylase activit…
Bin: 2.2.2.2	major CHO metabolism.degradation.starch.starch phosphorylase
	Id: seq_21166
	(p53536|phsl_vicfa : 284.0) Alpha-1,4 glucan phosphorylase L isozyme, chloroplast precursor (EC 2.4.1.1) (Starch phosphorylase L) - Vicia faba (Broad bean) & (at3g29320 : 271.0) Encodes a plastidic alpha-glucan phosphorylase. In vitro, the enzyme has a preference for maltooligosaccharides, such as maltoheptaose.; Glycosyl transferase, family 35; FUNCTIONS IN: phosphorylase activity, transferase a…
Bin: 2.2.2.2	major CHO metabolism.degradation.starch.starch phosphorylase
	Id: seq_26029
	(p53535|phsl2_soltu : 129.0) Alpha-1,4 glucan phosphorylase L-2 isozyme, chloroplast precursor (EC 2.4.1.1) (Starch phosphorylase L-2) - Solanum tuberosum (Potato) & (at3g29320 : 124.0) Encodes a plastidic alpha-glucan phosphorylase. In vitro, the enzyme has a preference for maltooligosaccharides, such as maltoheptaose.; Glycosyl transferase, family 35; FUNCTIONS IN: phosphorylase activity, trans…
Bin: 2.2.2.2	major CHO metabolism.degradation.starch.starch phosphorylase
	Id: seq_27863
	(p53536|phsl_vicfa : 92.0) Alpha-1,4 glucan phosphorylase L isozyme, chloroplast precursor (EC 2.4.1.1) (Starch phosphorylase L) - Vicia faba (Broad bean) & (at3g29320 : 81.6) Encodes a plastidic alpha-glucan phosphorylase. In vitro, the enzyme has a preference for maltooligosaccharides, such as maltoheptaose.; Glycosyl transferase, family 35; FUNCTIONS IN: phosphorylase activity, transferase act…
Bin: 2.2.2.2	major CHO metabolism.degradation.starch.starch phosphorylase
	Id: seq_37458
	(p53535|phsl2_soltu : 358.0) Alpha-1,4 glucan phosphorylase L-2 isozyme, chloroplast precursor (EC 2.4.1.1) (Starch phosphorylase L-2) - Solanum tuberosum (Potato) & (at3g29320 : 336.0) Encodes a plastidic alpha-glucan phosphorylase. In vitro, the enzyme has a preference for maltooligosaccharides, such as maltoheptaose.; Glycosyl transferase, family 35; FUNCTIONS IN: phosphorylase activity, trans…
Bin: 2.2.2.2	major CHO metabolism.degradation.starch.starch phosphorylase
	Id: seq_40161
	(p53536|phsl_vicfa : 293.0) Alpha-1,4 glucan phosphorylase L isozyme, chloroplast precursor (EC 2.4.1.1) (Starch phosphorylase L) - Vicia faba (Broad bean) & (at3g29320 : 281.0) Encodes a plastidic alpha-glucan phosphorylase. In vitro, the enzyme has a preference for maltooligosaccharides, such as maltoheptaose.; Glycosyl transferase, family 35; FUNCTIONS IN: phosphorylase activity, transferase a…
Bin: 2.2.2.2	major CHO metabolism.degradation.starch.starch phosphorylase
	Id: seq_41541
	(p53537|phsh_vicfa : 153.0) Alpha-glucan phosphorylase, H isozyme (EC 2.4.1.1) (Starch phosphorylase H) - Vicia faba (Broad bean) & (at3g46970 : 145.0) Encodes a cytosolic alpha-glucan phosphorylase. In vitro, the enzyme has a preference for branched polysaccharides, such as glycogen.; alpha-glucan phosphorylase 2 (PHS2); FUNCTIONS IN: phosphorylase activity, transferase activity, transferring gl…
Bin: 2.2.2.2	major CHO metabolism.degradation.starch.starch phosphorylase
	Id: seq_42142
	(p53535|phsl2_soltu : 150.0) Alpha-1,4 glucan phosphorylase L-2 isozyme, chloroplast precursor (EC 2.4.1.1) (Starch phosphorylase L-2) - Solanum tuberosum (Potato) & (at3g29320 : 126.0) Encodes a plastidic alpha-glucan phosphorylase. In vitro, the enzyme has a preference for maltooligosaccharides, such as maltoheptaose.; Glycosyl transferase, family 35; FUNCTIONS IN: phosphorylase activity, trans…
Bin: 2.2.2.2	major CHO metabolism.degradation.starch.starch phosphorylase
	Id: seq_49636
	(p53535|phsl2_soltu : 192.0) Alpha-1,4 glucan phosphorylase L-2 isozyme, chloroplast precursor (EC 2.4.1.1) (Starch phosphorylase L-2) - Solanum tuberosum (Potato) & (at3g29320 : 189.0) Encodes a plastidic alpha-glucan phosphorylase. In vitro, the enzyme has a preference for maltooligosaccharides, such as maltoheptaose.; Glycosyl transferase, family 35; FUNCTIONS IN: phosphorylase activity, trans…
Bin: 2.2.2.2	major CHO metabolism.degradation.starch.starch phosphorylase
	Id: seq_52530
	(p53535|phsl2_soltu : 100.0) Alpha-1,4 glucan phosphorylase L-2 isozyme, chloroplast precursor (EC 2.4.1.1) (Starch phosphorylase L-2) - Solanum tuberosum (Potato) & (at3g29320 : 97.4) Encodes a plastidic alpha-glucan phosphorylase. In vitro, the enzyme has a preference for maltooligosaccharides, such as maltoheptaose.; Glycosyl transferase, family 35; FUNCTIONS IN: phosphorylase activity, transf…
Bin: 2.2.2.2	major CHO metabolism.degradation.starch.starch phosphorylase
	Id: seq_60092
	(at3g46970 : 114.0) Encodes a cytosolic alpha-glucan phosphorylase. In vitro, the enzyme has a preference for branched polysaccharides, such as glycogen.; alpha-glucan phosphorylase 2 (PHS2); FUNCTIONS IN: phosphorylase activity, transferase activity, transferring glycosyl groups; INVOLVED IN: response to cadmium ion, response to water deprivation; LOCATED IN: cytosol, chloroplast; EXPRESSED IN: …
Bin: 2.2.2.2	major CHO metabolism.degradation.starch.starch phosphorylase
	Id: seq_61548
	(p32811|phsh_soltu : 113.0) Alpha-glucan phosphorylase, H isozyme (EC 2.4.1.1) (Starch phosphorylase H) - Solanum tuberosum (Potato) & (at3g46970 : 111.0) Encodes a cytosolic alpha-glucan phosphorylase. In vitro, the enzyme has a preference for branched polysaccharides, such as glycogen.; alpha-glucan phosphorylase 2 (PHS2); FUNCTIONS IN: phosphorylase activity, transferase activity, transferring…
Bin: 2.2.2.2	major CHO metabolism.degradation.starch.starch phosphorylase
	Id: seq_82172
	(p27598|phsl_ipoba : 147.0) Alpha-1,4 glucan phosphorylase L isozyme, chloroplast precursor (EC 2.4.1.1) (Starch phosphorylase L) - Ipomoea batatas (Sweet potato) (Batate) & (at3g29320 : 134.0) Encodes a plastidic alpha-glucan phosphorylase. In vitro, the enzyme has a preference for maltooligosaccharides, such as maltoheptaose.; Glycosyl transferase, family 35; FUNCTIONS IN: phosphorylase activit…
Bin: 2.2.2.2	major CHO metabolism.degradation.starch.starch phosphorylase
	Id: seq_99344
	(p04045|phsl1_soltu : 104.0) Alpha-1,4 glucan phosphorylase L-1 isozyme, chloroplast precursor (EC 2.4.1.1) (Starch phosphorylase L-1) - Solanum tuberosum (Potato) & (at3g29320 : 99.8) Encodes a plastidic alpha-glucan phosphorylase. In vitro, the enzyme has a preference for maltooligosaccharides, such as maltoheptaose.; Glycosyl transferase, family 35; FUNCTIONS IN: phosphorylase activity, transf…
Bin: 2.2.2.2	major CHO metabolism.degradation.starch.starch phosphorylase
	Id: seq_100047
	(p53535|phsl2_soltu : 157.0) Alpha-1,4 glucan phosphorylase L-2 isozyme, chloroplast precursor (EC 2.4.1.1) (Starch phosphorylase L-2) - Solanum tuberosum (Potato) & (at3g29320 : 141.0) Encodes a plastidic alpha-glucan phosphorylase. In vitro, the enzyme has a preference for maltooligosaccharides, such as maltoheptaose.; Glycosyl transferase, family 35; FUNCTIONS IN: phosphorylase activity, trans…
Bin: 2.2.2.2	major CHO metabolism.degradation.starch.starch phosphorylase
	Id: seq_105257
	(p04045|phsl1_soltu : 99.8) Alpha-1,4 glucan phosphorylase L-1 isozyme, chloroplast precursor (EC 2.4.1.1) (Starch phosphorylase L-1) - Solanum tuberosum (Potato) & (at3g29320 : 98.2) Encodes a plastidic alpha-glucan phosphorylase. In vitro, the enzyme has a preference for maltooligosaccharides, such as maltoheptaose.; Glycosyl transferase, family 35; FUNCTIONS IN: phosphorylase activity, transfe…
Bin: 2.2.2.1.2	major CHO metabolism.degradation.starch.starch cleavage.beta amylase
	Id: seq_776
	(at3g23920 : 691.0) Encodes a chloroplast beta-amylase. Is necessary for leaf starch breakdown in the absence of BAM3.; beta-amylase 1 (BAM1); FUNCTIONS IN: beta-amylase activity; INVOLVED IN: response to water deprivation, starch catabolic process; LOCATED IN: cytosol, nucleus; EXPRESSED IN: 25 plant structures; EXPRESSED DURING: 15 growth stages; CONTAINS InterPro DOMAIN/s: Glycoside hydrolase,…
Bin: 2.2.2.1.2	major CHO metabolism.degradation.starch.starch cleavage.beta amylase
	Id: seq_3316
	(at3g23920 : 294.0) Encodes a chloroplast beta-amylase. Is necessary for leaf starch breakdown in the absence of BAM3.; beta-amylase 1 (BAM1); FUNCTIONS IN: beta-amylase activity; INVOLVED IN: response to water deprivation, starch catabolic process; LOCATED IN: cytosol, nucleus; EXPRESSED IN: 25 plant structures; EXPRESSED DURING: 15 growth stages; CONTAINS InterPro DOMAIN/s: Glycoside hydrolase,…
Bin: 2.2.2.1.2	major CHO metabolism.degradation.starch.starch cleavage.beta amylase
	Id: seq_4054
	(at5g18670 : 600.0) putative beta-amylase BMY3 (BMY3); beta-amylase 3 (BMY3); FUNCTIONS IN: cation binding, beta-amylase activity, catalytic activity; INVOLVED IN: cellulose biosynthetic process, carbohydrate metabolic process, polysaccharide catabolic process; EXPRESSED IN: 23 plant structures; EXPRESSED DURING: 13 growth stages; CONTAINS InterPro DOMAIN/s: Glycoside hydrolase, family 14 (InterP…
Bin: 2.2.2.1.2	major CHO metabolism.degradation.starch.starch cleavage.beta amylase
	Id: seq_6942
	(o64407|amyb_vigun : 829.0) Beta-amylase (EC 3.2.1.2) (1,4-alpha-D-glucan maltohydrolase) - Vigna unguiculata (Cowpea) & (at2g32290 : 727.0) beta-amylase 6 (BAM6); FUNCTIONS IN: cation binding, beta-amylase activity, catalytic activity; INVOLVED IN: cellulose biosynthetic process, carbohydrate metabolic process, polysaccharide catabolic process; LOCATED IN: chloroplast; EXPRESSED IN: 14 plant str…
Bin: 2.2.2.1.2	major CHO metabolism.degradation.starch.starch cleavage.beta amylase
	Id: seq_11137
	(at2g45880 : 878.0) beta-amylase 7 (BAM7); FUNCTIONS IN: cation binding, beta-amylase activity, catalytic activity; INVOLVED IN: cellulose biosynthetic process, carbohydrate metabolic process, polysaccharide catabolic process; LOCATED IN: cellular_component unknown; EXPRESSED IN: 19 plant structures; EXPRESSED DURING: 12 growth stages; CONTAINS InterPro DOMAIN/s: Glycoside hydrolase, family 14, c…
Bin: 2.2.2.1.2	major CHO metabolism.degradation.starch.starch cleavage.beta amylase
	Id: seq_11167
	(at3g23920 : 436.0) Encodes a chloroplast beta-amylase. Is necessary for leaf starch breakdown in the absence of BAM3.; beta-amylase 1 (BAM1); FUNCTIONS IN: beta-amylase activity; INVOLVED IN: response to water deprivation, starch catabolic process; LOCATED IN: cytosol, nucleus; EXPRESSED IN: 25 plant structures; EXPRESSED DURING: 15 growth stages; CONTAINS InterPro DOMAIN/s: Glycoside hydrolase,…
Bin: 2.2.2.1.2	major CHO metabolism.degradation.starch.starch cleavage.beta amylase
	Id: seq_15076
	(at3g23920 : 138.0) Encodes a chloroplast beta-amylase. Is necessary for leaf starch breakdown in the absence of BAM3.; beta-amylase 1 (BAM1); FUNCTIONS IN: beta-amylase activity; INVOLVED IN: response to water deprivation, starch catabolic process; LOCATED IN: cytosol, nucleus; EXPRESSED IN: 25 plant structures; EXPRESSED DURING: 15 growth stages; CONTAINS InterPro DOMAIN/s: Glycoside hydrolase,…
Bin: 2.2.2.1.2	major CHO metabolism.degradation.starch.starch cleavage.beta amylase
	Id: seq_17534
	(at5g45300 : 722.0) beta-amylase 2 (BMY2); FUNCTIONS IN: cation binding, beta-amylase activity, catalytic activity; INVOLVED IN: carbohydrate metabolic process, polysaccharide catabolic process; LOCATED IN: cellular_component unknown; EXPRESSED IN: 22 plant structures; EXPRESSED DURING: 13 growth stages; CONTAINS InterPro DOMAIN/s: Glycoside hydrolase, family 14 (InterPro:IPR001554), Glycoside hy…
Bin: 2.2.2.1.2	major CHO metabolism.degradation.starch.starch cleavage.beta amylase
	Id: seq_17642
	(at4g17090 : 99.0) Encodes a beta-amylase targeted to the chloroplast. Transgenic BMY8 RNAi lines fail to accumulate maltose during cold shock suggesting that maltose accumulation coincides with BMY8 expression. Apart from maltose, the sugar content of the RNAi lines were similar to wildtype (glucose and sucrose unaffected).; chloroplast beta-amylase (CT-BMY); CONTAINS InterPro DOMAIN/s: Glycosid…
Bin: 2.2.2.1.2	major CHO metabolism.degradation.starch.starch cleavage.beta amylase
	Id: seq_18358
	(at3g23920 : 158.0) Encodes a chloroplast beta-amylase. Is necessary for leaf starch breakdown in the absence of BAM3.; beta-amylase 1 (BAM1); FUNCTIONS IN: beta-amylase activity; INVOLVED IN: response to water deprivation, starch catabolic process; LOCATED IN: cytosol, nucleus; EXPRESSED IN: 25 plant structures; EXPRESSED DURING: 15 growth stages; CONTAINS InterPro DOMAIN/s: Glycoside hydrolase,…
Bin: 2.2.2.1.2	major CHO metabolism.degradation.starch.starch cleavage.beta amylase
	Id: seq_22031
	(at4g17090 : 104.0) Encodes a beta-amylase targeted to the chloroplast. Transgenic BMY8 RNAi lines fail to accumulate maltose during cold shock suggesting that maltose accumulation coincides with BMY8 expression. Apart from maltose, the sugar content of the RNAi lines were similar to wildtype (glucose and sucrose unaffected).; chloroplast beta-amylase (CT-BMY); CONTAINS InterPro DOMAIN/s: Glycosi…
Bin: 2.2.2.1.2	major CHO metabolism.degradation.starch.starch cleavage.beta amylase
	Id: seq_27840
	(o64407|amyb_vigun : 99.4) Beta-amylase (EC 3.2.1.2) (1,4-alpha-D-glucan maltohydrolase) - Vigna unguiculata (Cowpea) & (at2g32290 : 86.3) beta-amylase 6 (BAM6); FUNCTIONS IN: cation binding, beta-amylase activity, catalytic activity; INVOLVED IN: cellulose biosynthetic process, carbohydrate metabolic process, polysaccharide catabolic process; LOCATED IN: chloroplast; EXPRESSED IN: 14 plant struc…
Bin: 2.2.2.1.2	major CHO metabolism.degradation.starch.starch cleavage.beta amylase
	Id: seq_28895
	(at4g17090 : 462.0) Encodes a beta-amylase targeted to the chloroplast. Transgenic BMY8 RNAi lines fail to accumulate maltose during cold shock suggesting that maltose accumulation coincides with BMY8 expression. Apart from maltose, the sugar content of the RNAi lines were similar to wildtype (glucose and sucrose unaffected).; chloroplast beta-amylase (CT-BMY); CONTAINS InterPro DOMAIN/s: Glycosi…
Bin: 2.2.2.1.2	major CHO metabolism.degradation.starch.starch cleavage.beta amylase
	Id: seq_30591
	(at4g00490 : 450.0) Encodes a chloroplast beta-amylase. The enzyme activity is very weak compared to BAM1 and BAM3. Mutant of BAM2 has no visible phenotype.; beta-amylase 2 (BAM2); FUNCTIONS IN: beta-amylase activity; INVOLVED IN: carbohydrate metabolic process, polysaccharide catabolic process; LOCATED IN: chloroplast; EXPRESSED IN: 22 plant structures; EXPRESSED DURING: 13 growth stages; CONTAI…
Bin: 2.2.2.1.2	major CHO metabolism.degradation.starch.starch cleavage.beta amylase
	Id: seq_32366
	(at5g55700 : 712.0) In vitro assay indicates no beta-amylase activity of BAM4. However mutation in BAM4 impairs starch breakdown. BAM4 may play a regulatory role.; beta-amylase 4 (BAM4); CONTAINS InterPro DOMAIN/s: Glycoside hydrolase, family 14 (InterPro:IPR001554), Glycoside hydrolase, catalytic core (InterPro:IPR017853), Glycoside hydrolase, family 14B, plant (InterPro:IPR001371), Glycoside hy…
Bin: 2.2.2.1.2	major CHO metabolism.degradation.starch.starch cleavage.beta amylase
	Id: seq_35728
	(at4g17090 : 97.1) Encodes a beta-amylase targeted to the chloroplast. Transgenic BMY8 RNAi lines fail to accumulate maltose during cold shock suggesting that maltose accumulation coincides with BMY8 expression. Apart from maltose, the sugar content of the RNAi lines were similar to wildtype (glucose and sucrose unaffected).; chloroplast beta-amylase (CT-BMY); CONTAINS InterPro DOMAIN/s: Glycosid…
Bin: 2.2.2.1.2	major CHO metabolism.degradation.starch.starch cleavage.beta amylase
	Id: seq_36212
	(p10538|amyb_soybn : 168.0) Beta-amylase (EC 3.2.1.2) (1,4-alpha-D-glucan maltohydrolase) - Glycine max (Soybean) & (at2g32290 : 151.0) beta-amylase 6 (BAM6); FUNCTIONS IN: cation binding, beta-amylase activity, catalytic activity; INVOLVED IN: cellulose biosynthetic process, carbohydrate metabolic process, polysaccharide catabolic process; LOCATED IN: chloroplast; EXPRESSED IN: 14 plant structur…
Bin: 2.2.2.1.2	major CHO metabolism.degradation.starch.starch cleavage.beta amylase
	Id: seq_37185
	(at4g17090 : 285.0) Encodes a beta-amylase targeted to the chloroplast. Transgenic BMY8 RNAi lines fail to accumulate maltose during cold shock suggesting that maltose accumulation coincides with BMY8 expression. Apart from maltose, the sugar content of the RNAi lines were similar to wildtype (glucose and sucrose unaffected).; chloroplast beta-amylase (CT-BMY); CONTAINS InterPro DOMAIN/s: Glycosi…
Bin: 2.2.2.1.2	major CHO metabolism.degradation.starch.starch cleavage.beta amylase
	Id: seq_40915
	(at4g17090 : 234.0) Encodes a beta-amylase targeted to the chloroplast. Transgenic BMY8 RNAi lines fail to accumulate maltose during cold shock suggesting that maltose accumulation coincides with BMY8 expression. Apart from maltose, the sugar content of the RNAi lines were similar to wildtype (glucose and sucrose unaffected).; chloroplast beta-amylase (CT-BMY); CONTAINS InterPro DOMAIN/s: Glycosi…
Bin: 2.2.2.1.2	major CHO metabolism.degradation.starch.starch cleavage.beta amylase
	Id: seq_42530
	(at2g45880 : 90.1) beta-amylase 7 (BAM7); FUNCTIONS IN: cation binding, beta-amylase activity, catalytic activity; INVOLVED IN: cellulose biosynthetic process, carbohydrate metabolic process, polysaccharide catabolic process; LOCATED IN: cellular_component unknown; EXPRESSED IN: 19 plant structures; EXPRESSED DURING: 12 growth stages; CONTAINS InterPro DOMAIN/s: Glycoside hydrolase, family 14, co…
Bin: 2.2.2.1.2	major CHO metabolism.degradation.starch.starch cleavage.beta amylase
	Id: seq_44920
	(o64407|amyb_vigun : 294.0) Beta-amylase (EC 3.2.1.2) (1,4-alpha-D-glucan maltohydrolase) - Vigna unguiculata (Cowpea) & (at2g32290 : 257.0) beta-amylase 6 (BAM6); FUNCTIONS IN: cation binding, beta-amylase activity, catalytic activity; INVOLVED IN: cellulose biosynthetic process, carbohydrate metabolic process, polysaccharide catabolic process; LOCATED IN: chloroplast; EXPRESSED IN: 14 plant str…
Bin: 2.2.2.1.2	major CHO metabolism.degradation.starch.starch cleavage.beta amylase
	Id: seq_45082
	(at5g18670 : 112.0) putative beta-amylase BMY3 (BMY3); beta-amylase 3 (BMY3); FUNCTIONS IN: cation binding, beta-amylase activity, catalytic activity; INVOLVED IN: cellulose biosynthetic process, carbohydrate metabolic process, polysaccharide catabolic process; EXPRESSED IN: 23 plant structures; EXPRESSED DURING: 13 growth stages; CONTAINS InterPro DOMAIN/s: Glycoside hydrolase, family 14 (InterP…
Bin: 2.2.2.1.2	major CHO metabolism.degradation.starch.starch cleavage.beta amylase
	Id: seq_45113
	(at2g45880 : 168.0) beta-amylase 7 (BAM7); FUNCTIONS IN: cation binding, beta-amylase activity, catalytic activity; INVOLVED IN: cellulose biosynthetic process, carbohydrate metabolic process, polysaccharide catabolic process; LOCATED IN: cellular_component unknown; EXPRESSED IN: 19 plant structures; EXPRESSED DURING: 12 growth stages; CONTAINS InterPro DOMAIN/s: Glycoside hydrolase, family 14, c…
Bin: 2.2.2.1.2	major CHO metabolism.degradation.starch.starch cleavage.beta amylase
	Id: seq_47057
	(at5g45300 : 89.7) beta-amylase 2 (BMY2); FUNCTIONS IN: cation binding, beta-amylase activity, catalytic activity; INVOLVED IN: carbohydrate metabolic process, polysaccharide catabolic process; LOCATED IN: cellular_component unknown; EXPRESSED IN: 22 plant structures; EXPRESSED DURING: 13 growth stages; CONTAINS InterPro DOMAIN/s: Glycoside hydrolase, family 14 (InterPro:IPR001554), Glycoside hyd…
Bin: 2.2.2.1.2	major CHO metabolism.degradation.starch.starch cleavage.beta amylase
	Id: seq_49082
	(at4g17090 : 168.0) Encodes a beta-amylase targeted to the chloroplast. Transgenic BMY8 RNAi lines fail to accumulate maltose during cold shock suggesting that maltose accumulation coincides with BMY8 expression. Apart from maltose, the sugar content of the RNAi lines were similar to wildtype (glucose and sucrose unaffected).; chloroplast beta-amylase (CT-BMY); CONTAINS InterPro DOMAIN/s: Glycosi…
Bin: 2.2.2.1.2	major CHO metabolism.degradation.starch.starch cleavage.beta amylase
	Id: seq_56958
	(at4g17090 : 149.0) Encodes a beta-amylase targeted to the chloroplast. Transgenic BMY8 RNAi lines fail to accumulate maltose during cold shock suggesting that maltose accumulation coincides with BMY8 expression. Apart from maltose, the sugar content of the RNAi lines were similar to wildtype (glucose and sucrose unaffected).; chloroplast beta-amylase (CT-BMY); CONTAINS InterPro DOMAIN/s: Glycosi…
Bin: 2.2.2.1.2	major CHO metabolism.degradation.starch.starch cleavage.beta amylase
	Id: seq_61396
	(at5g55700 : 84.7) In vitro assay indicates no beta-amylase activity of BAM4. However mutation in BAM4 impairs starch breakdown. BAM4 may play a regulatory role.; beta-amylase 4 (BAM4); CONTAINS InterPro DOMAIN/s: Glycoside hydrolase, family 14 (InterPro:IPR001554), Glycoside hydrolase, catalytic core (InterPro:IPR017853), Glycoside hydrolase, family 14B, plant (InterPro:IPR001371), Glycoside hyd…
Bin: 2.2.2.1.2	major CHO metabolism.degradation.starch.starch cleavage.beta amylase
	Id: seq_81743
	(o64407|amyb_vigun : 121.0) Beta-amylase (EC 3.2.1.2) (1,4-alpha-D-glucan maltohydrolase) - Vigna unguiculata (Cowpea) & (at2g32290 : 105.0) beta-amylase 6 (BAM6); FUNCTIONS IN: cation binding, beta-amylase activity, catalytic activity; INVOLVED IN: cellulose biosynthetic process, carbohydrate metabolic process, polysaccharide catabolic process; LOCATED IN: chloroplast; EXPRESSED IN: 14 plant str…
Bin: 2.2.2.1.2	major CHO metabolism.degradation.starch.starch cleavage.beta amylase
	Id: seq_95855
	(at5g55700 : 120.0) In vitro assay indicates no beta-amylase activity of BAM4. However mutation in BAM4 impairs starch breakdown. BAM4 may play a regulatory role.; beta-amylase 4 (BAM4); CONTAINS InterPro DOMAIN/s: Glycoside hydrolase, family 14 (InterPro:IPR001554), Glycoside hydrolase, catalytic core (InterPro:IPR017853), Glycoside hydrolase, family 14B, plant (InterPro:IPR001371), Glycoside hy…
Bin: 2.2.2.1.2	major CHO metabolism.degradation.starch.starch cleavage.beta amylase
	Id: seq_95989
	(at5g45300 : 100.0) beta-amylase 2 (BMY2); FUNCTIONS IN: cation binding, beta-amylase activity, catalytic activity; INVOLVED IN: carbohydrate metabolic process, polysaccharide catabolic process; LOCATED IN: cellular_component unknown; EXPRESSED IN: 22 plant structures; EXPRESSED DURING: 13 growth stages; CONTAINS InterPro DOMAIN/s: Glycoside hydrolase, family 14 (InterPro:IPR001554), Glycoside hy…
Bin: 2.2.2.1.2	major CHO metabolism.degradation.starch.starch cleavage.beta amylase
	Id: seq_105018
	(at5g45300 : 124.0) beta-amylase 2 (BMY2); FUNCTIONS IN: cation binding, beta-amylase activity, catalytic activity; INVOLVED IN: carbohydrate metabolic process, polysaccharide catabolic process; LOCATED IN: cellular_component unknown; EXPRESSED IN: 22 plant structures; EXPRESSED DURING: 13 growth stages; CONTAINS InterPro DOMAIN/s: Glycoside hydrolase, family 14 (InterPro:IPR001554), Glycoside hy…
Bin: 2.2.2.1.2	major CHO metabolism.degradation.starch.starch cleavage.beta amylase
	Id: seq_108681
	(at4g00490 : 128.0) Encodes a chloroplast beta-amylase. The enzyme activity is very weak compared to BAM1 and BAM3. Mutant of BAM2 has no visible phenotype.; beta-amylase 2 (BAM2); FUNCTIONS IN: beta-amylase activity; INVOLVED IN: carbohydrate metabolic process, polysaccharide catabolic process; LOCATED IN: chloroplast; EXPRESSED IN: 22 plant structures; EXPRESSED DURING: 13 growth stages; CONTAI…
Bin: 2.2.2.1.2	major CHO metabolism.degradation.starch.starch cleavage.beta amylase
	Id: seq_109427
	(at4g17090 : 119.0) Encodes a beta-amylase targeted to the chloroplast. Transgenic BMY8 RNAi lines fail to accumulate maltose during cold shock suggesting that maltose accumulation coincides with BMY8 expression. Apart from maltose, the sugar content of the RNAi lines were similar to wildtype (glucose and sucrose unaffected).; chloroplast beta-amylase (CT-BMY); CONTAINS InterPro DOMAIN/s: Glycosi…
Bin: 2.2.2.1.2	major CHO metabolism.degradation.starch.starch cleavage.beta amylase
	Id: seq_113734
	(at3g23920 : 93.2) Encodes a chloroplast beta-amylase. Is necessary for leaf starch breakdown in the absence of BAM3.; beta-amylase 1 (BAM1); FUNCTIONS IN: beta-amylase activity; INVOLVED IN: response to water deprivation, starch catabolic process; LOCATED IN: cytosol, nucleus; EXPRESSED IN: 25 plant structures; EXPRESSED DURING: 15 growth stages; CONTAINS InterPro DOMAIN/s: Glycoside hydrolase, …
Bin: 2.2.2.1.1	major CHO metabolism.degradation.starch.starch cleavage.alpha amylase
	Id: seq_1098
	(at1g69830 : 1228.0) Encodes a plastid-localized α-amylase. Expression is reduced in the SEX4 mutant. Loss of function mutations show normal diurnal pattern of starch accumulation/degradation. Expression follows circadian rhythms.; alpha-amylase-like 3 (AMY3); FUNCTIONS IN: alpha-amylase activity; INVOLVED IN: circadian rhythm, starch catabolic process; LOCATED IN: chloroplast stroma, chloroplast…
Bin: 2.2.2.1.1	major CHO metabolism.degradation.starch.starch cleavage.alpha amylase
	Id: seq_7558
	(at1g69830 : 761.0) Encodes a plastid-localized α-amylase. Expression is reduced in the SEX4 mutant. Loss of function mutations show normal diurnal pattern of starch accumulation/degradation. Expression follows circadian rhythms.; alpha-amylase-like 3 (AMY3); FUNCTIONS IN: alpha-amylase activity; INVOLVED IN: circadian rhythm, starch catabolic process; LOCATED IN: chloroplast stroma, chloroplast;…
Bin: 2.2.2.1.1	major CHO metabolism.degradation.starch.starch cleavage.alpha amylase
	Id: seq_13423
	(at1g76130 : 114.0) alpha-amylase, putative / 1,4-alpha-D-glucan glucanohydrolase, putative, strong similarity to alpha-amylase GI:7532799 from (Malus x domestica);contains Pfam profile PF00128: Alpha amylase, catalytic domain. Predicted to be secreted based on SignalP analysis.; alpha-amylase-like 2 (AMY2); FUNCTIONS IN: cation binding, catalytic activity, alpha-amylase activity, calcium ion bin…
Bin: 2.2.2.1.1	major CHO metabolism.degradation.starch.starch cleavage.alpha amylase
	Id: seq_18021
	(at1g69830 : 167.0) Encodes a plastid-localized α-amylase. Expression is reduced in the SEX4 mutant. Loss of function mutations show normal diurnal pattern of starch accumulation/degradation. Expression follows circadian rhythms.; alpha-amylase-like 3 (AMY3); FUNCTIONS IN: alpha-amylase activity; INVOLVED IN: circadian rhythm, starch catabolic process; LOCATED IN: chloroplast stroma, chloroplast;…
Bin: 2.2.2.1.1	major CHO metabolism.degradation.starch.starch cleavage.alpha amylase
	Id: seq_18748
	(p04063|amy2_horvu : 309.0) Alpha-amylase type B isozyme precursor (EC 3.2.1.1) (1,4-alpha-D-glucan glucanohydrolase) (AMY2-2) (High pI alpha-amylase) - Hordeum vulgare (Barley) & (at4g25000 : 303.0) Predicted to be secreted protein based on signalP prediction. Involved in starch mobilization. Mutants are defective in alpha-amylase activity. (Note: AMY1 has been found in the literature to be refe…
Bin: 2.2.2.1.1	major CHO metabolism.degradation.starch.starch cleavage.alpha amylase
	Id: seq_18916
	(p27939|amy3c_orysa : 150.0) Alpha-amylase isozyme 3C precursor (EC 3.2.1.1) (1,4-alpha-D-glucan glucanohydrolase) - Oryza sativa (Rice) & (at4g25000 : 149.0) Predicted to be secreted protein based on signalP prediction. Involved in starch mobilization. Mutants are defective in alpha-amylase activity. (Note: AMY1 has been found in the literature to be referred to as AMY3, which is not to be confu…
Bin: 2.2.2.1.1	major CHO metabolism.degradation.starch.starch cleavage.alpha amylase
	Id: seq_21743
	(p27937|amy3b_orysa : 602.0) Alpha-amylase isozyme 3B precursor (EC 3.2.1.1) (1,4-alpha-D-glucan glucanohydrolase) - Oryza sativa (Rice) & (at4g25000 : 566.0) Predicted to be secreted protein based on signalP prediction. Involved in starch mobilization. Mutants are defective in alpha-amylase activity. (Note: AMY1 has been found in the literature to be referred to as AMY3, which is not to be confu…
Bin: 2.2.2.1.1	major CHO metabolism.degradation.starch.starch cleavage.alpha amylase
	Id: seq_25678
	(at1g69830 : 168.0) Encodes a plastid-localized α-amylase. Expression is reduced in the SEX4 mutant. Loss of function mutations show normal diurnal pattern of starch accumulation/degradation. Expression follows circadian rhythms.; alpha-amylase-like 3 (AMY3); FUNCTIONS IN: alpha-amylase activity; INVOLVED IN: circadian rhythm, starch catabolic process; LOCATED IN: chloroplast stroma, chloroplast;…
Bin: 2.2.2.1.1	major CHO metabolism.degradation.starch.starch cleavage.alpha amylase
	Id: seq_27918
	(at1g76130 : 158.0) alpha-amylase, putative / 1,4-alpha-D-glucan glucanohydrolase, putative, strong similarity to alpha-amylase GI:7532799 from (Malus x domestica);contains Pfam profile PF00128: Alpha amylase, catalytic domain. Predicted to be secreted based on SignalP analysis.; alpha-amylase-like 2 (AMY2); FUNCTIONS IN: cation binding, catalytic activity, alpha-amylase activity, calcium ion bin…
Bin: 2.2.2.1.1	major CHO metabolism.degradation.starch.starch cleavage.alpha amylase
	Id: seq_36630
	(at1g76130 : 90.1) alpha-amylase, putative / 1,4-alpha-D-glucan glucanohydrolase, putative, strong similarity to alpha-amylase GI:7532799 from (Malus x domestica);contains Pfam profile PF00128: Alpha amylase, catalytic domain. Predicted to be secreted based on SignalP analysis.; alpha-amylase-like 2 (AMY2); FUNCTIONS IN: cation binding, catalytic activity, alpha-amylase activity, calcium ion bind…
Bin: 2.2.2.1.1	major CHO metabolism.degradation.starch.starch cleavage.alpha amylase
	Id: seq_48048
	(p04063|amy2_horvu : 293.0) Alpha-amylase type B isozyme precursor (EC 3.2.1.1) (1,4-alpha-D-glucan glucanohydrolase) (AMY2-2) (High pI alpha-amylase) - Hordeum vulgare (Barley) & (at4g25000 : 290.0) Predicted to be secreted protein based on signalP prediction. Involved in starch mobilization. Mutants are defective in alpha-amylase activity. (Note: AMY1 has been found in the literature to be refe…
Bin: 2.2.2.1.1	major CHO metabolism.degradation.starch.starch cleavage.alpha amylase
	Id: seq_59457
	(at1g69830 : 137.0) Encodes a plastid-localized α-amylase. Expression is reduced in the SEX4 mutant. Loss of function mutations show normal diurnal pattern of starch accumulation/degradation. Expression follows circadian rhythms.; alpha-amylase-like 3 (AMY3); FUNCTIONS IN: alpha-amylase activity; INVOLVED IN: circadian rhythm, starch catabolic process; LOCATED IN: chloroplast stroma, chloroplast;…
Bin: 2.2.2.1.1	major CHO metabolism.degradation.starch.starch cleavage.alpha amylase
	Id: seq_66970
	(at1g76130 : 150.0) alpha-amylase, putative / 1,4-alpha-D-glucan glucanohydrolase, putative, strong similarity to alpha-amylase GI:7532799 from (Malus x domestica);contains Pfam profile PF00128: Alpha amylase, catalytic domain. Predicted to be secreted based on SignalP analysis.; alpha-amylase-like 2 (AMY2); FUNCTIONS IN: cation binding, catalytic activity, alpha-amylase activity, calcium ion bin…
Bin: 2.2.2.1.1	major CHO metabolism.degradation.starch.starch cleavage.alpha amylase
	Id: seq_111562
	(p27935|amy2a_orysa : 110.0) Alpha-amylase isozyme 2A precursor (EC 3.2.1.1) (1,4-alpha-D-glucan glucanohydrolase) (Alpha-amylase isozyme C2) - Oryza sativa (Rice) & (at4g25000 : 106.0) Predicted to be secreted protein based on signalP prediction. Involved in starch mobilization. Mutants are defective in alpha-amylase activity. (Note: AMY1 has been found in the literature to be referred to as AMY…
Bin: 2.2.2.1.1	major CHO metabolism.degradation.starch.starch cleavage.alpha amylase
	Id: seq_113740
	(p27932|amy3a_orysa : 102.0) Alpha-amylase isozyme 3A precursor (EC 3.2.1.1) (1,4-alpha-D-glucan glucanohydrolase) - Oryza sativa (Rice) & (at4g25000 : 88.2) Predicted to be secreted protein based on signalP prediction. Involved in starch mobilization. Mutants are defective in alpha-amylase activity. (Note: AMY1 has been found in the literature to be referred to as AMY3, which is not to be confus…
Bin: 2.2.2.1	major CHO metabolism.degradation.starch.starch cleavage
	Id: seq_340
	(at3g23640 : 663.0) heteroglycan glucosidase 1 (HGL1); FUNCTIONS IN: hydrolase activity, hydrolyzing O-glycosyl compounds; INVOLVED IN: carbohydrate metabolic process; LOCATED IN: chloroplast; EXPRESSED IN: 22 plant structures; EXPRESSED DURING: 13 growth stages; CONTAINS InterPro DOMAIN/s: Glycoside hydrolase, family 31 (InterPro:IPR000322), Glycoside hydrolase, catalytic core (InterPro:IPR01785…
Bin: 2.2.2.1	major CHO metabolism.degradation.starch.starch cleavage
	Id: seq_8571
	(at3g23640 : 471.0) heteroglycan glucosidase 1 (HGL1); FUNCTIONS IN: hydrolase activity, hydrolyzing O-glycosyl compounds; INVOLVED IN: carbohydrate metabolic process; LOCATED IN: chloroplast; EXPRESSED IN: 22 plant structures; EXPRESSED DURING: 13 growth stages; CONTAINS InterPro DOMAIN/s: Glycoside hydrolase, family 31 (InterPro:IPR000322), Glycoside hydrolase, catalytic core (InterPro:IPR01785…
Bin: 2.2.2.1	major CHO metabolism.degradation.starch.starch cleavage
	Id: seq_9561
	(at3g23640 : 667.0) heteroglycan glucosidase 1 (HGL1); FUNCTIONS IN: hydrolase activity, hydrolyzing O-glycosyl compounds; INVOLVED IN: carbohydrate metabolic process; LOCATED IN: chloroplast; EXPRESSED IN: 22 plant structures; EXPRESSED DURING: 13 growth stages; CONTAINS InterPro DOMAIN/s: Glycoside hydrolase, family 31 (InterPro:IPR000322), Glycoside hydrolase, catalytic core (InterPro:IPR01785…
Bin: 2.2.2.1	major CHO metabolism.degradation.starch.starch cleavage
	Id: seq_28779
	(at3g23640 : 296.0) heteroglycan glucosidase 1 (HGL1); FUNCTIONS IN: hydrolase activity, hydrolyzing O-glycosyl compounds; INVOLVED IN: carbohydrate metabolic process; LOCATED IN: chloroplast; EXPRESSED IN: 22 plant structures; EXPRESSED DURING: 13 growth stages; CONTAINS InterPro DOMAIN/s: Glycoside hydrolase, family 31 (InterPro:IPR000322), Glycoside hydrolase, catalytic core (InterPro:IPR01785…
Bin: 2.2.2.1	major CHO metabolism.degradation.starch.starch cleavage
	Id: seq_45151
	(at3g23640 : 121.0) heteroglycan glucosidase 1 (HGL1); FUNCTIONS IN: hydrolase activity, hydrolyzing O-glycosyl compounds; INVOLVED IN: carbohydrate metabolic process; LOCATED IN: chloroplast; EXPRESSED IN: 22 plant structures; EXPRESSED DURING: 13 growth stages; CONTAINS InterPro DOMAIN/s: Glycoside hydrolase, family 31 (InterPro:IPR000322), Glycoside hydrolase, catalytic core (InterPro:IPR01785…
Bin: 2.2.1.99	major CHO metabolism.degradation.sucrose.misc
	Id: seq_6555
	(at3g27570 : 344.0) Sucrase/ferredoxin-like family protein; FUNCTIONS IN: molecular_function unknown; INVOLVED IN: biological_process unknown; LOCATED IN: endomembrane system; EXPRESSED IN: 22 plant structures; EXPRESSED DURING: 13 growth stages; CONTAINS InterPro DOMAIN/s: Thioredoxin fold (InterPro:IPR012335), Sucraseferredoxin-like (InterPro:IPR009737), Thioredoxin-like fold (InterPro:IPR01233…
Bin: 2.2.1.99	major CHO metabolism.degradation.sucrose.misc
	Id: seq_8561
	(at4g26620 : 554.0) Sucrase/ferredoxin-like family protein; CONTAINS InterPro DOMAIN/s: Thioredoxin fold (InterPro:IPR012335), Sucraseferredoxin-like (InterPro:IPR009737), Thioredoxin-like fold (InterPro:IPR012336); BEST Arabidopsis thaliana protein match is: Sucrase/ferredoxin-like family protein (TAIR:AT5G55900.1); Has 30201 Blast hits to 17322 proteins in 780 species: Archae - 12; Bacteria - 1…
Bin: 2.2.1.99	major CHO metabolism.degradation.sucrose.misc
	Id: seq_19521
	(at3g27570 : 229.0) Sucrase/ferredoxin-like family protein; FUNCTIONS IN: molecular_function unknown; INVOLVED IN: biological_process unknown; LOCATED IN: endomembrane system; EXPRESSED IN: 22 plant structures; EXPRESSED DURING: 13 growth stages; CONTAINS InterPro DOMAIN/s: Thioredoxin fold (InterPro:IPR012335), Sucraseferredoxin-like (InterPro:IPR009737), Thioredoxin-like fold (InterPro:IPR01233…
Bin: 2.2.1.99	major CHO metabolism.degradation.sucrose.misc
	Id: seq_52833
	(at4g26620 : 184.0) Sucrase/ferredoxin-like family protein; CONTAINS InterPro DOMAIN/s: Thioredoxin fold (InterPro:IPR012335), Sucraseferredoxin-like (InterPro:IPR009737), Thioredoxin-like fold (InterPro:IPR012336); BEST Arabidopsis thaliana protein match is: Sucrase/ferredoxin-like family protein (TAIR:AT5G55900.1); Has 30201 Blast hits to 17322 proteins in 780 species: Archae - 12; Bacteria - 1…
Bin: 2.2.1.99	major CHO metabolism.degradation.sucrose.misc
	Id: seq_71515
	(at5g40510 : 139.0) Sucrase/ferredoxin-like family protein; CONTAINS InterPro DOMAIN/s: Thioredoxin fold (InterPro:IPR012335), Sucraseferredoxin-like (InterPro:IPR009737), Thioredoxin-like fold (InterPro:IPR012336); BEST Arabidopsis thaliana protein match is: Sucrase/ferredoxin-like family protein (TAIR:AT3G27570.1); Has 1807 Blast hits to 1807 proteins in 277 species: Archae - 0; Bacteria - 0; M…
Bin: 2.2.1.99	major CHO metabolism.degradation.sucrose.misc
	Id: seq_114346
	(at4g26620 : 122.0) Sucrase/ferredoxin-like family protein; CONTAINS InterPro DOMAIN/s: Thioredoxin fold (InterPro:IPR012335), Sucraseferredoxin-like (InterPro:IPR009737), Thioredoxin-like fold (InterPro:IPR012336); BEST Arabidopsis thaliana protein match is: Sucrase/ferredoxin-like family protein (TAIR:AT5G55900.1); Has 30201 Blast hits to 17322 proteins in 780 species: Archae - 12; Bacteria - 1…
Bin: 2.2.1.5	major CHO metabolism.degradation.sucrose.Susy
	Id: seq_1473
	(ipr000368 : 1500.0) Sucrose synthase & (p13708|susy_soybn : 1447.0) Sucrose synthase (EC 2.4.1.13) (Sucrose-UDP glucosyltransferase) (Nodulin-100) - Glycine max (Soybean) & (at3g43190 : 1366.0) Encodes a protein with sucrose synthase activity (SUS4).; sucrose synthase 4 (SUS4); FUNCTIONS IN: UDP-glycosyltransferase activity, sucrose synthase activity, transferase activity, transferring glycosyl …
Bin: 2.2.1.5	major CHO metabolism.degradation.sucrose.Susy
	Id: seq_1623
	(ipr000368 : 1500.0) Sucrose synthase & (o24301|sus2_pea : 981.0) Sucrose synthase 2 (EC 2.4.1.13) (Sucrose-UDP glucosyltransferase 2) - Pisum sativum (Garden pea) & (at4g02280 : 980.0) Encodes a protein with sucrose synthase activity (SUS3). It appears to be important for sucrose metabolism in developing seeds, especially during the late maturation phase, about 18 days after flowering.; sucrose …
Bin: 2.2.1.5	major CHO metabolism.degradation.sucrose.Susy
	Id: seq_6835
	(p13708|susy_soybn : 367.0) Sucrose synthase (EC 2.4.1.13) (Sucrose-UDP glucosyltransferase) (Nodulin-100) - Glycine max (Soybean) & (at3g43190 : 350.0) Encodes a protein with sucrose synthase activity (SUS4).; sucrose synthase 4 (SUS4); FUNCTIONS IN: UDP-glycosyltransferase activity, sucrose synthase activity, transferase activity, transferring glycosyl groups; INVOLVED IN: sucrose biosynthetic …
Bin: 2.2.1.5	major CHO metabolism.degradation.sucrose.Susy
	Id: seq_9037
	(p13708|susy_soybn : 590.0) Sucrose synthase (EC 2.4.1.13) (Sucrose-UDP glucosyltransferase) (Nodulin-100) - Glycine max (Soybean) & (at5g20830 : 576.0) Encodes a protein with sucrose synthase activity (SUS1).; sucrose synthase 1 (SUS1); FUNCTIONS IN: UDP-glycosyltransferase activity, sucrose synthase activity; INVOLVED IN: in 6 processes; LOCATED IN: cellular_component unknown; EXPRESSED IN: 31 …
Bin: 2.2.1.5	major CHO metabolism.degradation.sucrose.Susy
	Id: seq_10028
	(q01390|susy_phaau : 159.0) Sucrose synthase (EC 2.4.1.13) (Sucrose-UDP glucosyltransferase) - Phaseolus aureus (Mung bean) (Vigna radiata) & (at5g20830 : 134.0) Encodes a protein with sucrose synthase activity (SUS1).; sucrose synthase 1 (SUS1); FUNCTIONS IN: UDP-glycosyltransferase activity, sucrose synthase activity; INVOLVED IN: in 6 processes; LOCATED IN: cellular_component unknown; EXPRESSE…
Bin: 2.2.1.5	major CHO metabolism.degradation.sucrose.Susy
	Id: seq_12578
	(q01390|susy_phaau : 85.5) Sucrose synthase (EC 2.4.1.13) (Sucrose-UDP glucosyltransferase) - Phaseolus aureus (Mung bean) (Vigna radiata) & (at5g20830 : 82.8) Encodes a protein with sucrose synthase activity (SUS1).; sucrose synthase 1 (SUS1); FUNCTIONS IN: UDP-glycosyltransferase activity, sucrose synthase activity; INVOLVED IN: in 6 processes; LOCATED IN: cellular_component unknown; EXPRESSED …
Bin: 2.2.1.5	major CHO metabolism.degradation.sucrose.Susy
	Id: seq_17362
	(p13708|susy_soybn : 121.0) Sucrose synthase (EC 2.4.1.13) (Sucrose-UDP glucosyltransferase) (Nodulin-100) - Glycine max (Soybean) & (at3g43190 : 112.0) Encodes a protein with sucrose synthase activity (SUS4).; sucrose synthase 4 (SUS4); FUNCTIONS IN: UDP-glycosyltransferase activity, sucrose synthase activity, transferase activity, transferring glycosyl groups; INVOLVED IN: sucrose biosynthetic …
Bin: 2.2.1.5	major CHO metabolism.degradation.sucrose.Susy
	Id: seq_20003
	(o65026|susy_medsa : 157.0) Sucrose synthase (EC 2.4.1.13) (Sucrose-UDP glucosyltransferase) - Medicago sativa (Alfalfa) & (at3g43190 : 140.0) Encodes a protein with sucrose synthase activity (SUS4).; sucrose synthase 4 (SUS4); FUNCTIONS IN: UDP-glycosyltransferase activity, sucrose synthase activity, transferase activity, transferring glycosyl groups; INVOLVED IN: sucrose biosynthetic process, r…
Bin: 2.2.1.5	major CHO metabolism.degradation.sucrose.Susy
	Id: seq_21848
	(at4g02280 : 157.0) Encodes a protein with sucrose synthase activity (SUS3). It appears to be important for sucrose metabolism in developing seeds, especially during the late maturation phase, about 18 days after flowering.; sucrose synthase 3 (SUS3); CONTAINS InterPro DOMAIN/s: Sucrose synthase, plant/cyanobacteria (InterPro:IPR012820), Sucrose synthase (InterPro:IPR000368), Glycosyl transferase…
Bin: 2.2.1.5	major CHO metabolism.degradation.sucrose.Susy
	Id: seq_21966
	(at4g02280 : 172.0) Encodes a protein with sucrose synthase activity (SUS3). It appears to be important for sucrose metabolism in developing seeds, especially during the late maturation phase, about 18 days after flowering.; sucrose synthase 3 (SUS3); CONTAINS InterPro DOMAIN/s: Sucrose synthase, plant/cyanobacteria (InterPro:IPR012820), Sucrose synthase (InterPro:IPR000368), Glycosyl transferase…
Bin: 2.2.1.5	major CHO metabolism.degradation.sucrose.Susy
	Id: seq_24812
	(p13708|susy_soybn : 170.0) Sucrose synthase (EC 2.4.1.13) (Sucrose-UDP glucosyltransferase) (Nodulin-100) - Glycine max (Soybean) & (at5g20830 : 151.0) Encodes a protein with sucrose synthase activity (SUS1).; sucrose synthase 1 (SUS1); FUNCTIONS IN: UDP-glycosyltransferase activity, sucrose synthase activity; INVOLVED IN: in 6 processes; LOCATED IN: cellular_component unknown; EXPRESSED IN: 31 …
Bin: 2.2.1.5	major CHO metabolism.degradation.sucrose.Susy
	Id: seq_28617
	(p13708|susy_soybn : 323.0) Sucrose synthase (EC 2.4.1.13) (Sucrose-UDP glucosyltransferase) (Nodulin-100) - Glycine max (Soybean) & (at5g20830 : 313.0) Encodes a protein with sucrose synthase activity (SUS1).; sucrose synthase 1 (SUS1); FUNCTIONS IN: UDP-glycosyltransferase activity, sucrose synthase activity; INVOLVED IN: in 6 processes; LOCATED IN: cellular_component unknown; EXPRESSED IN: 31 …
Bin: 2.2.1.5	major CHO metabolism.degradation.sucrose.Susy
	Id: seq_33011
	(p31926|susy_vicfa : 140.0) Sucrose synthase (EC 2.4.1.13) (Sucrose-UDP glucosyltransferase) - Vicia faba (Broad bean) & (at3g43190 : 127.0) Encodes a protein with sucrose synthase activity (SUS4).; sucrose synthase 4 (SUS4); FUNCTIONS IN: UDP-glycosyltransferase activity, sucrose synthase activity, transferase activity, transferring glycosyl groups; INVOLVED IN: sucrose biosynthetic process, res…
Bin: 2.2.1.5	major CHO metabolism.degradation.sucrose.Susy
	Id: seq_33516
	(at4g02280 : 96.3) Encodes a protein with sucrose synthase activity (SUS3). It appears to be important for sucrose metabolism in developing seeds, especially during the late maturation phase, about 18 days after flowering.; sucrose synthase 3 (SUS3); CONTAINS InterPro DOMAIN/s: Sucrose synthase, plant/cyanobacteria (InterPro:IPR012820), Sucrose synthase (InterPro:IPR000368), Glycosyl transferase,…
Bin: 2.2.1.5	major CHO metabolism.degradation.sucrose.Susy
	Id: seq_35006
	(p13708|susy_soybn : 139.0) Sucrose synthase (EC 2.4.1.13) (Sucrose-UDP glucosyltransferase) (Nodulin-100) - Glycine max (Soybean) & (at3g43190 : 131.0) Encodes a protein with sucrose synthase activity (SUS4).; sucrose synthase 4 (SUS4); FUNCTIONS IN: UDP-glycosyltransferase activity, sucrose synthase activity, transferase activity, transferring glycosyl groups; INVOLVED IN: sucrose biosynthetic …
Bin: 2.2.1.5	major CHO metabolism.degradation.sucrose.Susy
	Id: seq_37317
	(at3g43190 : 190.0) Encodes a protein with sucrose synthase activity (SUS4).; sucrose synthase 4 (SUS4); FUNCTIONS IN: UDP-glycosyltransferase activity, sucrose synthase activity, transferase activity, transferring glycosyl groups; INVOLVED IN: sucrose biosynthetic process, response to hypoxia; LOCATED IN: plasma membrane, vacuole, membrane; EXPRESSED IN: 15 plant structures; EXPRESSED DURING: 6 …
Bin: 2.2.1.5	major CHO metabolism.degradation.sucrose.Susy
	Id: seq_37926
	(at5g49190 : 147.0) Encodes a sucrose synthase (SUS2). The activity of the enzyme could not be assayed as proved to be insoluble (PMID 17257168). However, analyses of an sus2 mutant revealed a deficiency in sucrose synthase activity 12 and 15 days after flowering. There are some reports that SUS2 transcript levels are increased in leaves specifically by O(2) deficiency whereas other reports indic…
Bin: 2.2.1.5	major CHO metabolism.degradation.sucrose.Susy
	Id: seq_42885
	(at4g02280 : 115.0) Encodes a protein with sucrose synthase activity (SUS3). It appears to be important for sucrose metabolism in developing seeds, especially during the late maturation phase, about 18 days after flowering.; sucrose synthase 3 (SUS3); CONTAINS InterPro DOMAIN/s: Sucrose synthase, plant/cyanobacteria (InterPro:IPR012820), Sucrose synthase (InterPro:IPR000368), Glycosyl transferase…
Bin: 2.2.1.5	major CHO metabolism.degradation.sucrose.Susy
	Id: seq_45096
	(at1g73370 : 90.1) Encodes a protein with sucrose synthase activity (SUS6).; sucrose synthase 6 (SUS6); CONTAINS InterPro DOMAIN/s: Sucrose synthase, plant/cyanobacteria (InterPro:IPR012820), Sucrose synthase (InterPro:IPR000368), Glycosyl transferase, group 1 (InterPro:IPR001296); BEST Arabidopsis thaliana protein match is: sucrose synthase 5 (TAIR:AT5G37180.1). & (reliability: 180.2) & (origina…
Bin: 2.2.1.5	major CHO metabolism.degradation.sucrose.Susy
	Id: seq_53816
	(at5g37180 : 176.0) Encodes a protein with sucrose synthase activity (SUS5).; sucrose synthase 5 (SUS5); CONTAINS InterPro DOMAIN/s: Sucrose synthase, plant/cyanobacteria (InterPro:IPR012820), Sucrose synthase (InterPro:IPR000368), Glycosyl transferase, group 1 (InterPro:IPR001296); BEST Arabidopsis thaliana protein match is: sucrose synthase 6 (TAIR:AT1G73370.1); Has 35333 Blast hits to 34131 pr…
Bin: 2.2.1.5	major CHO metabolism.degradation.sucrose.Susy
	Id: seq_62854
	(at5g49190 : 243.0) Encodes a sucrose synthase (SUS2). The activity of the enzyme could not be assayed as proved to be insoluble (PMID 17257168). However, analyses of an sus2 mutant revealed a deficiency in sucrose synthase activity 12 and 15 days after flowering. There are some reports that SUS2 transcript levels are increased in leaves specifically by O(2) deficiency whereas other reports indic…
Bin: 2.2.1.5	major CHO metabolism.degradation.sucrose.Susy
	Id: seq_63333
	(at1g73370 : 117.0) Encodes a protein with sucrose synthase activity (SUS6).; sucrose synthase 6 (SUS6); CONTAINS InterPro DOMAIN/s: Sucrose synthase, plant/cyanobacteria (InterPro:IPR012820), Sucrose synthase (InterPro:IPR000368), Glycosyl transferase, group 1 (InterPro:IPR001296); BEST Arabidopsis thaliana protein match is: sucrose synthase 5 (TAIR:AT5G37180.1). & (reliability: 234.0) & (origin…
Bin: 2.2.1.5	major CHO metabolism.degradation.sucrose.Susy
	Id: seq_63573
	(at5g49190 : 162.0) Encodes a sucrose synthase (SUS2). The activity of the enzyme could not be assayed as proved to be insoluble (PMID 17257168). However, analyses of an sus2 mutant revealed a deficiency in sucrose synthase activity 12 and 15 days after flowering. There are some reports that SUS2 transcript levels are increased in leaves specifically by O(2) deficiency whereas other reports indic…
Bin: 2.2.1.5	major CHO metabolism.degradation.sucrose.Susy
	Id: seq_70412
	(at1g73370 : 184.0) Encodes a protein with sucrose synthase activity (SUS6).; sucrose synthase 6 (SUS6); CONTAINS InterPro DOMAIN/s: Sucrose synthase, plant/cyanobacteria (InterPro:IPR012820), Sucrose synthase (InterPro:IPR000368), Glycosyl transferase, group 1 (InterPro:IPR001296); BEST Arabidopsis thaliana protein match is: sucrose synthase 5 (TAIR:AT5G37180.1). & (o24301|sus2_pea : 93.6) Sucro…
Bin: 2.2.1.5	major CHO metabolism.degradation.sucrose.Susy
	Id: seq_73762
	(at5g37180 : 213.0) Encodes a protein with sucrose synthase activity (SUS5).; sucrose synthase 5 (SUS5); CONTAINS InterPro DOMAIN/s: Sucrose synthase, plant/cyanobacteria (InterPro:IPR012820), Sucrose synthase (InterPro:IPR000368), Glycosyl transferase, group 1 (InterPro:IPR001296); BEST Arabidopsis thaliana protein match is: sucrose synthase 6 (TAIR:AT1G73370.1); Has 35333 Blast hits to 34131 pr…
Bin: 2.2.1.5	major CHO metabolism.degradation.sucrose.Susy
	Id: seq_78672
	(at1g73370 : 220.0) Encodes a protein with sucrose synthase activity (SUS6).; sucrose synthase 6 (SUS6); CONTAINS InterPro DOMAIN/s: Sucrose synthase, plant/cyanobacteria (InterPro:IPR012820), Sucrose synthase (InterPro:IPR000368), Glycosyl transferase, group 1 (InterPro:IPR001296); BEST Arabidopsis thaliana protein match is: sucrose synthase 5 (TAIR:AT5G37180.1). & (o65026|susy_medsa : 188.0) Su…
Bin: 2.2.1.5	major CHO metabolism.degradation.sucrose.Susy
	Id: seq_82552
	(at4g02280 : 131.0) Encodes a protein with sucrose synthase activity (SUS3). It appears to be important for sucrose metabolism in developing seeds, especially during the late maturation phase, about 18 days after flowering.; sucrose synthase 3 (SUS3); CONTAINS InterPro DOMAIN/s: Sucrose synthase, plant/cyanobacteria (InterPro:IPR012820), Sucrose synthase (InterPro:IPR000368), Glycosyl transferase…
Bin: 2.2.1.5	major CHO metabolism.degradation.sucrose.Susy
	Id: seq_83308
	(at5g49190 : 161.0) Encodes a sucrose synthase (SUS2). The activity of the enzyme could not be assayed as proved to be insoluble (PMID 17257168). However, analyses of an sus2 mutant revealed a deficiency in sucrose synthase activity 12 and 15 days after flowering. There are some reports that SUS2 transcript levels are increased in leaves specifically by O(2) deficiency whereas other reports indic…
Bin: 2.2.1.5	major CHO metabolism.degradation.sucrose.Susy
	Id: seq_84141
	(at1g73370 : 122.0) Encodes a protein with sucrose synthase activity (SUS6).; sucrose synthase 6 (SUS6); CONTAINS InterPro DOMAIN/s: Sucrose synthase, plant/cyanobacteria (InterPro:IPR012820), Sucrose synthase (InterPro:IPR000368), Glycosyl transferase, group 1 (InterPro:IPR001296); BEST Arabidopsis thaliana protein match is: sucrose synthase 5 (TAIR:AT5G37180.1). & (p13708|susy_soybn : 103.0) Su…
Bin: 2.2.1.5	major CHO metabolism.degradation.sucrose.Susy
[truncated: 63,509 more rows]
[truncated: 103 more columns]
