# Supplementary material for: A Multi-Omics Analysis Pipeline for the Metabolic Pathway Reconstruction in the Orphan Species Quercus ilex
Source: Front Plant Sci. 2018 Jul 11;9:935. doi: 10.3389/fpls.2018.00935 (PMC6050436; doi:10.3389/fpls.2018.00935)
Supplement: TABLE S6 — Bins of proteins. [file Table_6.XLSX]

## Sheet: Table S6 | ME_Bins_Proteins
Table S6| Bins of Proteins
Name	Identifier
1. PS
Bin: 1.3.13	PS.calvin cycle.rubisco interacting
	Id: seq_31
	(q40281|rca_maldo : 614.0) Ribulose bisphosphate carboxylase/oxygenase activase, chloroplast precursor (RuBisCO activase) (RA) - Malus domestica (Apple) (Malus sylvestris) & (at2g39730 : 602.0) Rubisco activase, a nuclear-encoded chloroplast protein that consists of two isoforms arising from alternative splicing in most plants. Required for the light activation of rubisco.; rubisco activase (RCA)…
Bin: 1.3.13	PS.calvin cycle.rubisco interacting
	Id: seq_115
	(q01587|rca_cucsa : 196.0) Ribulose bisphosphate carboxylase/oxygenase activase, chloroplast precursor (RuBisCO activase) (RA) - Cucumis sativus (Cucumber) & (at2g39730 : 191.0) Rubisco activase, a nuclear-encoded chloroplast protein that consists of two isoforms arising from alternative splicing in most plants. Required for the light activation of rubisco.; rubisco activase (RCA); FUNCTIONS IN: …
Bin: 1.3.13	PS.calvin cycle.rubisco interacting
	Id: seq_222
	(q40281|rca_maldo : 221.0) Ribulose bisphosphate carboxylase/oxygenase activase, chloroplast precursor (RuBisCO activase) (RA) - Malus domestica (Apple) (Malus sylvestris) & (at2g39730 : 206.0) Rubisco activase, a nuclear-encoded chloroplast protein that consists of two isoforms arising from alternative splicing in most plants. Required for the light activation of rubisco.; rubisco activase (RCA)…
Bin: 1.3.13	PS.calvin cycle.rubisco interacting
	Id: seq_683
	(q40281|rca_maldo : 236.0) Ribulose bisphosphate carboxylase/oxygenase activase, chloroplast precursor (RuBisCO activase) (RA) - Malus domestica (Apple) (Malus sylvestris) & (at2g39730 : 210.0) Rubisco activase, a nuclear-encoded chloroplast protein that consists of two isoforms arising from alternative splicing in most plants. Required for the light activation of rubisco.; rubisco activase (RCA)…
Bin: 1.3.13	PS.calvin cycle.rubisco interacting
	Id: seq_1294
	(p08926|ruba_pea : 813.0) RuBisCO large subunit-binding protein subunit alpha, chloroplast precursor (60 kDa chaperonin subunit alpha) (CPN-60 alpha) - Pisum sativum (Garden pea) & (at2g28000 : 785.0) Encodes chaperonin-60 alpha, a molecular chaperone involved in Rubisco folding. Mutants display aberrant chloroplast and embryo development.; chaperonin-60alpha (CPN60A); FUNCTIONS IN: ATP binding; …
Bin: 1.3.13	PS.calvin cycle.rubisco interacting
	Id: seq_1724
	(q40565|rca2_tobac : 172.0) Ribulose bisphosphate carboxylase/oxygenase activase 2, chloroplast precursor (RuBisCO activase 2) (RA 2) - Nicotiana tabacum (Common tobacco) & (at2g39730 : 154.0) Rubisco activase, a nuclear-encoded chloroplast protein that consists of two isoforms arising from alternative splicing in most plants. Required for the light activation of rubisco.; rubisco activase (RCA);…
Bin: 1.3.13	PS.calvin cycle.rubisco interacting
	Id: seq_1866
	(q40281|rca_maldo : 93.2) Ribulose bisphosphate carboxylase/oxygenase activase, chloroplast precursor (RuBisCO activase) (RA) - Malus domestica (Apple) (Malus sylvestris) & (at2g39730 : 81.3) Rubisco activase, a nuclear-encoded chloroplast protein that consists of two isoforms arising from alternative splicing in most plants. Required for the light activation of rubisco.; rubisco activase (RCA); …
Bin: 1.3.12	PS.calvin cycle.PRK
	Id: seq_1339
	(p27774|kppr_mescr : 685.0) Phosphoribulokinase, chloroplast precursor (EC 2.7.1.19) (Phosphopentokinase) (PRKase) (PRK) - Mesembryanthemum crystallinum (Common ice plant) & (at1g32060 : 675.0) phosphoribulokinase (PRK); FUNCTIONS IN: protein binding, phosphoribulokinase activity, ATP binding; INVOLVED IN: response to cold, defense response to bacterium, biosynthetic process, peptidyl-cysteine S-…
Bin: 1.3.11	PS.calvin cycle.RPE
	Id: seq_35
	(q43157|rpe_spiol : 457.0) Ribulose-phosphate 3-epimerase, chloroplast precursor (EC 5.1.3.1) (Pentose-5-phosphate 3-epimerase) (PPE) (RPE) (R5P3E) - Spinacia oleracea (Spinach) & (at5g61410 : 454.0) Arabidopsis thaliana ribulose-5-phosphate-3-epimerase mRNA; D-ribulose-5-phosphate-3-epimerase (RPE); FUNCTIONS IN: ribulose-phosphate 3-epimerase activity, catalytic activity; INVOLVED IN: response …
Bin: 1.3.11	PS.calvin cycle.RPE
	Id: seq_36
	(q43157|rpe_spiol : 153.0) Ribulose-phosphate 3-epimerase, chloroplast precursor (EC 5.1.3.1) (Pentose-5-phosphate 3-epimerase) (PPE) (RPE) (R5P3E) - Spinacia oleracea (Spinach) & (at5g61410 : 142.0) Arabidopsis thaliana ribulose-5-phosphate-3-epimerase mRNA; D-ribulose-5-phosphate-3-epimerase (RPE); FUNCTIONS IN: ribulose-phosphate 3-epimerase activity, catalytic activity; INVOLVED IN: response …
Bin: 1.3.9	PS.calvin cycle.seduheptulose bisphosphatase
	Id: seq_773
	(o20252|s17p_spiol : 638.0) Sedoheptulose-1,7-bisphosphatase, chloroplast precursor (EC 3.1.3.37) (Sedoheptulose-bisphosphatase) (SBPase) (SED(1,7)P2ase) - Spinacia oleracea (Spinach) & (at3g55800 : 623.0) Encodes the chloroplast enzyme sedoheptulose-1,7-bisphosphatase (SBPase), involved in the carbon reduction of the Calvin cycle. Increase in SBPase activity in transgenic lines accumulate up to …
Bin: 1.3.8	PS.calvin cycle.transketolase
	Id: seq_41
	(q7sic9|tktc_maize : 494.0) Transketolase, chloroplast (EC 2.2.1.1) (TK) - Zea mays (Maize) & (at2g45290 : 474.0) Transketolase; FUNCTIONS IN: catalytic activity, transketolase activity; INVOLVED IN: response to cadmium ion; LOCATED IN: chloroplast stroma, chloroplast; EXPRESSED IN: 25 plant structures; EXPRESSED DURING: 16 growth stages; CONTAINS InterPro DOMAIN/s: Transketolase, bacterial-like …
Bin: 1.3.8	PS.calvin cycle.transketolase
	Id: seq_1463
	(q43848|tktc_soltu : 242.0) Transketolase, chloroplast precursor (EC 2.2.1.1) (TK) - Solanum tuberosum (Potato) & (at2g45290 : 236.0) Transketolase; FUNCTIONS IN: catalytic activity, transketolase activity; INVOLVED IN: response to cadmium ion; LOCATED IN: chloroplast stroma, chloroplast; EXPRESSED IN: 25 plant structures; EXPRESSED DURING: 16 growth stages; CONTAINS InterPro DOMAIN/s: Transketol…
Bin: 1.3.8	PS.calvin cycle.transketolase
	Id: seq_1734
	(at2g45290 : 135.0) Transketolase; FUNCTIONS IN: catalytic activity, transketolase activity; INVOLVED IN: response to cadmium ion; LOCATED IN: chloroplast stroma, chloroplast; EXPRESSED IN: 25 plant structures; EXPRESSED DURING: 16 growth stages; CONTAINS InterPro DOMAIN/s: Transketolase, bacterial-like (InterPro:IPR005478), Transketolase, N-terminal (InterPro:IPR005474), Transketolase, C-termina…
Bin: 1.3.7	PS.calvin cycle.FBPase
	Id: seq_138
	(p46275|f16p1_pea : 613.0) Fructose-1,6-bisphosphatase, chloroplast precursor (EC 3.1.3.11) (D-fructose-1,6-bisphosphate 1-phosphohydrolase) (FBPase) - Pisum sativum (Garden pea) & (at3g54050 : 602.0) Encodes HCEF1 (High Cyclic Electron Flow 1). Mutant phenotype: constitutively elevated electron flow (CEFI).; high cyclic electron flow 1 (HCEF1); FUNCTIONS IN: fructose 1,6-bisphosphate 1-phosphata…
Bin: 1.3.6	PS.calvin cycle.aldolase
	Id: seq_101
	(gnl|cdd|84661 : 616.0) no description available & (gnl|cdd|36770 : 597.0) no description available & (at2g36460 : 586.0) Aldolase superfamily protein; FUNCTIONS IN: copper ion binding; INVOLVED IN: response to salt stress, pentose-phosphate shunt; LOCATED IN: mitochondrion, plasma membrane, membrane; EXPRESSED IN: 24 plant structures; EXPRESSED DURING: 14 growth stages; CONTAINS InterPro DOMAIN/…
Bin: 1.3.6	PS.calvin cycle.aldolase
	Id: seq_109
	(at4g38970 : 666.0) Protein is tyrosine-phosphorylated and its phosphorylation state is modulated in response to ABA in Arabidopsis thaliana seeds.; fructose-bisphosphate aldolase 2 (FBA2); FUNCTIONS IN: fructose-bisphosphate aldolase activity, catalytic activity; INVOLVED IN: response to cadmium ion, pentose-phosphate shunt, response to abscisic acid stimulus; LOCATED IN: in 6 components; EXPRES…
Bin: 1.3.6	PS.calvin cycle.aldolase
	Id: seq_373
	(at2g01140 : 651.0) Aldolase superfamily protein; FUNCTIONS IN: fructose-bisphosphate aldolase activity; INVOLVED IN: response to oxidative stress, response to cadmium ion, pentose-phosphate shunt; LOCATED IN: mitochondrion, chloroplast, plastoglobule; EXPRESSED IN: 25 plant structures; EXPRESSED DURING: 15 growth stages; CONTAINS InterPro DOMAIN/s: Aldolase-type TIM barrel (InterPro:IPR013785), …
Bin: 1.3.6	PS.calvin cycle.aldolase
	Id: seq_1089
	(p46256|alf1_pea : 353.0) Fructose-bisphosphate aldolase, cytoplasmic isozyme 1 (EC 4.1.2.13) - Pisum sativum (Garden pea) & (at4g26530 : 338.0) Aldolase superfamily protein; FUNCTIONS IN: fructose-bisphosphate aldolase activity; INVOLVED IN: glycolysis, metabolic process; EXPRESSED IN: 17 plant structures; EXPRESSED DURING: 11 growth stages; CONTAINS InterPro DOMAIN/s: Aldolase-type TIM barrel (…
Bin: 1.3.6	PS.calvin cycle.aldolase
	Id: seq_1775
	(gnl|cdd|84661 : 137.0) no description available & (p46256|alf1_pea : 134.0) Fructose-bisphosphate aldolase, cytoplasmic isozyme 1 (EC 4.1.2.13) - Pisum sativum (Garden pea) & (gnl|cdd|36770 : 133.0) no description available & (at4g26530 : 126.0) Aldolase superfamily protein; FUNCTIONS IN: fructose-bisphosphate aldolase activity; INVOLVED IN: glycolysis, metabolic process; EXPRESSED IN: 17 plant …
Bin: 1.3.6	PS.calvin cycle.aldolase
	Id: seq_1825
	(gnl|cdd|84661 : 129.0) no description available & (at4g26530 : 119.0) Aldolase superfamily protein; FUNCTIONS IN: fructose-bisphosphate aldolase activity; INVOLVED IN: glycolysis, metabolic process; EXPRESSED IN: 17 plant structures; EXPRESSED DURING: 11 growth stages; CONTAINS InterPro DOMAIN/s: Aldolase-type TIM barrel (InterPro:IPR013785), Fructose-bisphosphate aldolase, class-I (InterPro:IPR…
Bin: 1.3.5	PS.calvin cycle.TPI
	Id: seq_291
	(at2g21170 : 486.0) Encodes a plastidic triose phosphate isomerase. Mutants with reduced pdTPI levels have difficulty transitioning from heterotrophic to autotrophic growth. The related phenotypes, such as chlorosis in light-grown seedlings may result from an accumulation of dihydroxyacetone phosphate (DHAP) and methylglyoxal (MG) in these mutants. Both splice variants appear to be expressed, but…
Bin: 1.3.5	PS.calvin cycle.TPI
	Id: seq_1095
	(at2g21170 : 409.0) Encodes a plastidic triose phosphate isomerase. Mutants with reduced pdTPI levels have difficulty transitioning from heterotrophic to autotrophic growth. The related phenotypes, such as chlorosis in light-grown seedlings may result from an accumulation of dihydroxyacetone phosphate (DHAP) and methylglyoxal (MG) in these mutants. Both splice variants appear to be expressed, but…
Bin: 1.3.4	PS.calvin cycle.GAP
	Id: seq_116
	(p19866|g3pa_spiol : 595.0) Glyceraldehyde-3-phosphate dehydrogenase A, chloroplast precursor (EC 1.2.1.13) (NADP-dependent glyceraldehydephosphate dehydrogenase subunit A) - Spinacia oleracea (Spinach) & (at1g12900 : 592.0) glyceraldehyde 3-phosphate dehydrogenase A subunit 2 (GAPA-2); FUNCTIONS IN: NAD or NADH binding, glyceraldehyde-3-phosphate dehydrogenase activity; INVOLVED IN: oxidation re…
Bin: 1.3.4	PS.calvin cycle.GAP
	Id: seq_987
	(p12858|g3pa_pea : 607.0) Glyceraldehyde-3-phosphate dehydrogenase A, chloroplast precursor (EC 1.2.1.13) (NADP-dependent glyceraldehydephosphate dehydrogenase subunit A) - Pisum sativum (Garden pea) & (at1g12900 : 599.0) glyceraldehyde 3-phosphate dehydrogenase A subunit 2 (GAPA-2); FUNCTIONS IN: NAD or NADH binding, glyceraldehyde-3-phosphate dehydrogenase activity; INVOLVED IN: oxidation reduc…
Bin: 1.3.4	PS.calvin cycle.GAP
	Id: seq_1709
	(p09044|g3pb_tobac : 265.0) Glyceraldehyde-3-phosphate dehydrogenase B, chloroplast precursor (EC 1.2.1.13) (NADP-dependent glyceraldehydephosphate dehydrogenase subunit B) (Fragment) - Nicotiana tabacum (Common tobacco) & (at1g42970 : 254.0) Encodes chloroplast localized glyceraldehyde-3-phosphate dehydrogenase that can use both NADH and NADPH to reduce 1,3-diphosphate glycerate. It forms A2B2 h…
Bin: 1.3.4	PS.calvin cycle.GAP
	Id: seq_1733
	(gnl|cdd|76080 : 162.0) no description available & (at1g42970 : 128.0) Encodes chloroplast localized glyceraldehyde-3-phosphate dehydrogenase that can use both NADH and NADPH to reduce 1,3-diphosphate glycerate. It forms A2B2 heterotetramers with GapA forms of the GADPH enzyme. These complexes are active in the light under reducing conditions, but show reduced NADPH-dependent activity in response…
Bin: 1.3.4	PS.calvin cycle.GAP
	Id: seq_1778
	(at1g42970 : 150.0) Encodes chloroplast localized glyceraldehyde-3-phosphate dehydrogenase that can use both NADH and NADPH to reduce 1,3-diphosphate glycerate. It forms A2B2 heterotetramers with GapA forms of the GADPH enzyme. These complexes are active in the light under reducing conditions, but show reduced NADPH-dependent activity in response to oxidized thioredoxins and increased NAD(H)/NADP…
Bin: 1.3.4	PS.calvin cycle.GAP
	Id: seq_1803
	(gnl|cdd|76080 : 124.0) no description available & (at1g42970 : 89.0) Encodes chloroplast localized glyceraldehyde-3-phosphate dehydrogenase that can use both NADH and NADPH to reduce 1,3-diphosphate glycerate. It forms A2B2 heterotetramers with GapA forms of the GADPH enzyme. These complexes are active in the light under reducing conditions, but show reduced NADPH-dependent activity in response …
Bin: 1.3.3	PS.calvin cycle.phosphoglycerate kinase
	Id: seq_427
	(q42962|pgky_tobac : 655.0) Phosphoglycerate kinase, cytosolic (EC 2.7.2.3) - Nicotiana tabacum (Common tobacco) & (at1g79550 : 644.0) Encodes cytosolic phosphoglycerate kinase (PGK).; phosphoglycerate kinase (PGK); FUNCTIONS IN: phosphoglycerate kinase activity; INVOLVED IN: glycolysis; LOCATED IN: cytosol, apoplast, plasma membrane, nucleus, membrane; EXPRESSED IN: 26 plant structures; EXPRESSE…
Bin: 1.3.3	PS.calvin cycle.phosphoglycerate kinase
	Id: seq_606
	(at1g56190 : 693.0) Phosphoglycerate kinase family protein; FUNCTIONS IN: phosphoglycerate kinase activity; INVOLVED IN: glycolysis; LOCATED IN: thylakoid, mitochondrion, chloroplast, membrane; EXPRESSED IN: 25 plant structures; EXPRESSED DURING: 14 growth stages; CONTAINS InterPro DOMAIN/s: Phosphoglycerate kinase, N-terminal (InterPro:IPR015824), Phosphoglycerate kinase (InterPro:IPR001576), Ph…
Bin: 1.3.3	PS.calvin cycle.phosphoglycerate kinase
	Id: seq_1182
	(q42962|pgky_tobac : 665.0) Phosphoglycerate kinase, cytosolic (EC 2.7.2.3) - Nicotiana tabacum (Common tobacco) & (at1g79550 : 658.0) Encodes cytosolic phosphoglycerate kinase (PGK).; phosphoglycerate kinase (PGK); FUNCTIONS IN: phosphoglycerate kinase activity; INVOLVED IN: glycolysis; LOCATED IN: cytosol, apoplast, plasma membrane, nucleus, membrane; EXPRESSED IN: 26 plant structures; EXPRESSE…
Bin: 1.3.2	PS.calvin cycle.rubisco small subunit
	Id: seq_28
	(q96542|rbs_betve : 149.0) Ribulose bisphosphate carboxylase small chain, chloroplast precursor (EC 4.1.1.39) (RuBisCO small subunit) - Betula verrucosa (White birch) (Betula pendula) & (at1g67090 : 139.0) ribulose bisphosphate carboxylase small chain 1A (RBCS1A); FUNCTIONS IN: ribulose-bisphosphate carboxylase activity, copper ion binding; INVOLVED IN: carbon fixation, response to cold, response…
Bin: 1.3.2	PS.calvin cycle.rubisco small subunit
	Id: seq_1212
	(p10053|rbs_pinth : 201.0) Ribulose bisphosphate carboxylase small chain, chloroplast precursor (EC 4.1.1.39) (RuBisCO small subunit) - Pinus thunbergii (Green pine) (Japanese black pine) & (at5g38430 : 198.0) Ribulose bisphosphate carboxylase (small chain) family protein; FUNCTIONS IN: ribulose-bisphosphate carboxylase activity; INVOLVED IN: carbon fixation, response to blue light, response to r…
Bin: 1.3.2	PS.calvin cycle.rubisco small subunit
	Id: seq_2219
	(q96542|rbs_betve : 187.0) Ribulose bisphosphate carboxylase small chain, chloroplast precursor (EC 4.1.1.39) (RuBisCO small subunit) - Betula verrucosa (White birch) (Betula pendula) & (at5g38430 : 177.0) Ribulose bisphosphate carboxylase (small chain) family protein; FUNCTIONS IN: ribulose-bisphosphate carboxylase activity; INVOLVED IN: carbon fixation, response to blue light, response to red l…
Bin: 1.3.1	PS.calvin cycle.rubisco large subunit
	Id: seq_2069
	(gnl|cdd|79258 : 990.0) no description available & (p48715|rbl_sinal : 958.0) Ribulose bisphosphate carboxylase large chain precursor (EC 4.1.1.39) (RuBisCO large subunit) (Fragment) - Sinapis alba (White mustard) (Brassica hirta) & (atcg00490 : 928.0) large subunit of RUBISCO. Protein is tyrosine-phosphorylated and its phosphorylation state is modulated in response to ABA in Arabidopsis thaliana…
Bin: 1.2.6	PS.photorespiration.hydroxypyruvate reductase
	Id: seq_663
	(at1g79870 : 453.0) D-isomer specific 2-hydroxyacid dehydrogenase family protein; FUNCTIONS IN: in 6 functions; INVOLVED IN: metabolic process; EXPRESSED IN: 22 plant structures; EXPRESSED DURING: 13 growth stages; CONTAINS InterPro DOMAIN/s: D-isomer specific 2-hydroxyacid dehydrogenase, catalytic domain (InterPro:IPR006139), D-isomer specific 2-hydroxyacid dehydrogenase, NAD-binding (InterPro:I…
Bin: 1.2.6	PS.photorespiration.hydroxypyruvate reductase
	Id: seq_1120
	(p13443|dhgy_cucsa : 665.0) Glycerate dehydrogenase (EC 1.1.1.29) (NADH-dependent hydroxypyruvate reductase) (HPR) (GDH) - Cucumis sativus (Cucumber) & (at1g68010 : 644.0) Encodes hydroxypyruvate reductase.; hydroxypyruvate reductase (HPR); CONTAINS InterPro DOMAIN/s: D-isomer specific 2-hydroxyacid dehydrogenase, catalytic domain (InterPro:IPR006139), D-isomer specific 2-hydroxyacid dehydrogenas…
Bin: 1.2.6	PS.photorespiration.hydroxypyruvate reductase
	Id: seq_1340
	(at1g68010 : 445.0) Encodes hydroxypyruvate reductase.; hydroxypyruvate reductase (HPR); CONTAINS InterPro DOMAIN/s: D-isomer specific 2-hydroxyacid dehydrogenase, catalytic domain (InterPro:IPR006139), D-isomer specific 2-hydroxyacid dehydrogenase, NAD-binding (InterPro:IPR006140), NAD(P)-binding domain (InterPro:IPR016040); BEST Arabidopsis thaliana protein match is: D-3-phosphoglycerate dehydr…
Bin: 1.2.5	PS.photorespiration.serine hydroxymethyltransferase
	Id: seq_413
	(at1g36370 : 799.0) Encodes a putative serine hydroxymethyltransferase.; serine hydroxymethyltransferase 7 (SHM7); FUNCTIONS IN: pyridoxal phosphate binding, glycine hydroxymethyltransferase activity, catalytic activity; INVOLVED IN: response to cadmium ion, glycine metabolic process, L-serine metabolic process; EXPRESSED IN: 23 plant structures; EXPRESSED DURING: 15 growth stages; CONTAINS Inter…
Bin: 1.2.5	PS.photorespiration.serine hydroxymethyltransferase
	Id: seq_638
	(at4g32520 : 856.0) Encodes a serine hydroxymethyltransferase SHMT3 located in the plastid.; serine hydroxymethyltransferase 3 (SHM3); FUNCTIONS IN: glycine hydroxymethyltransferase activity; INVOLVED IN: glycine metabolic process, L-serine metabolic process; LOCATED IN: chloroplast, plastid; EXPRESSED IN: 24 plant structures; EXPRESSED DURING: 14 growth stages; CONTAINS InterPro DOMAIN/s: Pyrido…
Bin: 1.2.5	PS.photorespiration.serine hydroxymethyltransferase
	Id: seq_839
	(p34899|glym_pea : 897.0) Serine hydroxymethyltransferase, mitochondrial precursor (EC 2.1.2.1) (Serine methylase) (Glycine hydroxymethyltransferase) (SHMT) - Pisum sativum (Garden pea) & (at5g26780 : 890.0) Encodes a protein with serine hydroxymethyltransferase activity which is thought to be localized in the mitochondrial matrix. SHM2 expression fails to rescue the conditional lethal phenotype …
Bin: 1.2.5	PS.photorespiration.serine hydroxymethyltransferase
	Id: seq_1672
	(p49358|glyn_flapr : 283.0) Serine hydroxymethyltransferase 2, mitochondrial precursor (EC 2.1.2.1) (Serine methylase) (Glycine hydroxymethyltransferase) (SHMT) - Flaveria pringlei & (at5g26780 : 278.0) Encodes a protein with serine hydroxymethyltransferase activity which is thought to be localized in the mitochondrial matrix. SHM2 expression fails to rescue the conditional lethal phenotype of th…
Bin: 1.2.4.4	PS.photorespiration.glycine cleavage.H protein
	Id: seq_415
	(p49359|gcsh_flapr : 260.0) Glycine cleavage system H protein, mitochondrial precursor - Flaveria pringlei & (at1g32470 : 242.0) Single hybrid motif superfamily protein; FUNCTIONS IN: glycine dehydrogenase (decarboxylating) activity; INVOLVED IN: glycine catabolic process, glycine decarboxylation via glycine cleavage system; LOCATED IN: mitochondrion, glycine cleavage complex, chloroplast; EXPRES…
Bin: 1.2.4.4	PS.photorespiration.glycine cleavage.H protein
	Id: seq_1364
	(at2g35120 : 230.0) Single hybrid motif superfamily protein; FUNCTIONS IN: glycine dehydrogenase (decarboxylating) activity, ATP binding; INVOLVED IN: glycine catabolic process, glycine decarboxylation via glycine cleavage system; LOCATED IN: mitochondrion, glycine cleavage complex; EXPRESSED IN: 22 plant structures; EXPRESSED DURING: 13 growth stages; CONTAINS InterPro DOMAIN/s: 2-oxo acid dehyd…
Bin: 1.2.4.1	PS.photorespiration.glycine cleavage.P subunit
	Id: seq_1047
	(o49954|gcsp_soltu : 1257.0) Glycine dehydrogenase [decarboxylating], mitochondrial precursor (EC 1.4.4.2) (Glycine decarboxylase) (Glycine cleavage system P-protein) - Solanum tuberosum (Potato) & (at4g33010 : 1249.0) glycine decarboxylase P-protein 1 (GLDP1); FUNCTIONS IN: glycine dehydrogenase (decarboxylating) activity, protein binding; INVOLVED IN: glycine catabolic process, response to cadm…
Bin: 1.2.4.1	PS.photorespiration.glycine cleavage.P subunit
	Id: seq_1048
	(p26969|gcsp_pea : 144.0) Glycine dehydrogenase [decarboxylating], mitochondrial precursor (EC 1.4.4.2) (Glycine decarboxylase) (Glycine cleavage system P-protein) - Pisum sativum (Garden pea) & (at2g26080 : 129.0) glycine decarboxylase P-protein 2 (GLDP2); FUNCTIONS IN: glycine dehydrogenase (decarboxylating) activity, ATP binding; INVOLVED IN: oxidation reduction, glycine decarboxylation via gl…
Bin: 1.2.3	PS.photorespiration.aminotransferases peroxisomal
	Id: seq_231
	(at1g70580 : 905.0) Encodes a protein with glyoxylate aminotransferase activity. It can act on a number of different small substrates and amino acids in vitro.; alanine-2-oxoglutarate aminotransferase 2 (AOAT2); FUNCTIONS IN: glycine:2-oxoglutarate aminotransferase activity, L-alanine:2-oxoglutarate aminotransferase activity, alanine-glyoxylate transaminase activity; INVOLVED IN: photorespiration…
Bin: 1.2.2	PS.photorespiration.glycolate oxydase
	Id: seq_580
	(at3g14415 : 244.0) Aldolase-type TIM barrel family protein; FUNCTIONS IN: glycolate oxidase activity, oxidoreductase activity, FMN binding, catalytic activity; INVOLVED IN: oxidation reduction, metabolic process; LOCATED IN: peroxisome; EXPRESSED IN: guard cell, leaf; CONTAINS InterPro DOMAIN/s: Aldolase-type TIM barrel (InterPro:IPR013785), FMN-dependent alpha-hydroxy acid dehydrogenase, active…
Bin: 1.2.1	PS.photorespiration.phosphoglycolate phosphatase
	Id: seq_249
	(at5g36700 : 515.0) 2-phosphoglycolate phosphatase 1 (PGLP1); FUNCTIONS IN: phosphoglycolate phosphatase activity; INVOLVED IN: metabolic process; EXPRESSED IN: 7 plant structures; CONTAINS InterPro DOMAIN/s: HAD-superfamily hydrolase, subfamily IIA (InterPro:IPR006357), 2-phosphoglycolate phosphatase, eukaryotic (InterPro:IPR006349); BEST Arabidopsis thaliana protein match is: Haloacid dehalogen…
Bin: 1.1.40	PS.lightreaction.cyclic electron flow-chlororespiration
	Id: seq_126
	(at4g22890 : 477.0) Encodes PGRL1A, a transmembrane protein present in thylakoids. PGRL1A has a highly homologous isoform PGRL1B encoded by At4g11960. Plants lacking PGRL1 show perturbation of cyclic electron flow, similar to PGR5-deficient plants. PGRL1 and PGR5 interact physically and associate with PSI (photosystem I).; PGR5-LIKE A; FUNCTIONS IN: molecular_function unknown; INVOLVED IN: photos…
Bin: 1.1.6	PS.lightreaction.NADH DH
	Id: seq_561
	(at1g74880 : 92.0) Encodes subunit NDH-O of NAD(P)H:plastoquinone dehydrogenase complex (Ndh complex) present in the thylakoid membrane of chloroplasts. This subunit is thought to be required for Ndh complex assembly.; NAD(P)H:plastoquinone dehydrogenase complex subunit O (NDH-O); FUNCTIONS IN: oxidoreductase activity, acting on NADH or NADPH, quinone or similar compound as acceptor; INVOLVED IN:…
Bin: 1.1.5.4	PS.lightreaction.other electron carrier (ox/red).ferredoxin oxireductase
	Id: seq_1331
	(at1g15140 : 395.0) FAD/NAD(P)-binding oxidoreductase; FUNCTIONS IN: oxidoreductase activity, copper ion binding; INVOLVED IN: oxidation reduction; LOCATED IN: thylakoid, chloroplast; EXPRESSED IN: 23 plant structures; EXPRESSED DURING: 15 growth stages; CONTAINS InterPro DOMAIN/s: Oxidoreductase FAD/NAD(P)-binding (InterPro:IPR001433), Ferredoxin reductase-type FAD-binding domain (InterPro:IPR01…
Bin: 1.1.5.3	PS.lightreaction.other electron carrier (ox/red).ferredoxin reductase
	Id: seq_353
	(p10933|fenr1_pea : 606.0) Ferredoxin--NADP reductase, leaf isozyme, chloroplast precursor (EC 1.18.1.2) (FNR) - Pisum sativum (Garden pea) & (at5g66190 : 587.0) Encodes a leaf-type ferredoxin:NADP(H) oxidoreductase. It is present in both chloroplast stroma and thylakoid membranes but is more abundant in the thylakoid. The affinity of this enzyme for ferredoxin is slightly, but significantly, hig…
Bin: 1.1.5.3	PS.lightreaction.other electron carrier (ox/red).ferredoxin reductase
	Id: seq_1229
	(at1g20020 : 599.0) Encodes a leaf-type ferredoxin:NADP(H) oxidoreductase. It is present in both chloroplast stroma and thylakoid membranes but is more abundant in the stroma; LEAF FNR 2 (ATLFNR2); FUNCTIONS IN: oxidoreductase activity, poly(U) RNA binding, NADPH dehydrogenase activity; INVOLVED IN: oxidation reduction, defense response to fungus, incompatible interaction, defense response to bac…
Bin: 1.1.5.2	PS.lightreaction.other electron carrier (ox/red).ferredoxin
	Id: seq_1456
	(at1g02180 : 139.0) ferredoxin-related; FUNCTIONS IN: molecular_function unknown; INVOLVED IN: biological_process unknown; LOCATED IN: endomembrane system; EXPRESSED IN: 23 plant structures; EXPRESSED DURING: 15 growth stages; Has 54 Blast hits to 54 proteins in 11 species: Archae - 0; Bacteria - 0; Metazoa - 0; Fungi - 0; Plants - 54; Viruses - 0; Other Eukaryotes - 0 (source: NCBI BLink). & (re…
Bin: 1.1.5.1	PS.lightreaction.other electron carrier (ox/red).plastocyanin
	Id: seq_33
	(p00289|plas_spiol : 181.0) Plastocyanin, chloroplast precursor - Spinacia oleracea (Spinach) & (at1g20340 : 166.0) recombination and DNA-damage resistance protein (DRT112) One of two Arabidopsis plastocyanin genes. Predominant form, expressed 10x higher than PETE1. PETE2 is thought to be post-transcriptionally regulated via copper accumulation and is involved in copper homeostasis.; DNA-DAMAGE-R…
Bin: 1.1.4.7	PS.lightreaction.ATP synthase.delta chain
	Id: seq_1307
	(p32980|atpd_tobac : 134.0) ATP synthase delta chain, chloroplast precursor (EC 3.6.3.14) - Nicotiana tabacum (Common tobacco) & (at4g09650 : 116.0) Encodes the chloroplast ATPase delta-subunit.; ATP synthase delta-subunit gene (ATPD); FUNCTIONS IN: hydrogen ion transporting ATP synthase activity, rotational mechanism; INVOLVED IN: response to cold, defense response to bacterium, photosynthetic e…
Bin: 1.1.4.4	PS.lightreaction.ATP synthase.gamma chain
	Id: seq_333
	(p29790|atpg_tobac : 513.0) ATP synthase gamma chain, chloroplast precursor (EC 3.6.3.14) - Nicotiana tabacum (Common tobacco) & (at4g04640 : 504.0) One of two genes (with ATPC2) encoding the gamma subunit of Arabidopsis chloroplast ATP synthase.; ATPC1; FUNCTIONS IN: enzyme regulator activity; INVOLVED IN: photosynthetic electron transport in photosystem II, ATP synthesis coupled proton transpor…
Bin: 1.1.4.2	PS.lightreaction.ATP synthase.beta subunit
	Id: seq_2227
	(gnl|cdd|79277 : 219.0) no description available & (gnl|cdd|36564 : 190.0) no description available & (p06541|atpb_chlre : 187.0) ATP synthase subunit beta (EC 3.6.3.14) (ATPase subunit beta) (ATP synthase F1 sector subunit beta) - Chlamydomonas reinhardtii & (atcg00480 : 179.0) chloroplast-encoded gene for beta subunit of ATP synthase; ATP synthase subunit beta (PB); FUNCTIONS IN: hydrogen ion t…
Bin: 1.1.4.1	PS.lightreaction.ATP synthase.alpha subunit
	Id: seq_1891
	(gnl|cdd|79276 : 953.0) no description available & (q8s8y3|atpa_atrbe : 827.0) ATP synthase subunit alpha (EC 3.6.3.14) (ATPase subunit alpha) (ATP synthase F1 sector subunit alpha) - Atropa belladonna (Belladonna) (Deadly nightshade) & (atcg00120 : 818.0) Encodes the ATPase alpha subunit, which is a subunit of ATP synthase and part of the CF1 portion which catalyzes the conversion of ADP to ATP …
Bin: 1.1.3	PS.lightreaction.cytochrome b6/f
	Id: seq_32
	(p26291|ucria_pea : 328.0) Cytochrome b6-f complex iron-sulfur subunit, chloroplast precursor (EC 1.10.99.1) (Rieske iron-sulfur protein) (Plastohydroquinone:plastocyanin oxidoreductase iron-sulfur protein) (ISP) (RISP) - Pisum sativum (Garden pea) & (at4g03280 : 310.0) Encodes the Rieske FeS center of cytochrome b6f complex. Gene is expressed in shoot but not in root. Mutant has reduced electron…
Bin: 1.1.2.2	PS.lightreaction.photosystem I.PSI polypeptide subunits
	Id: seq_24
	(at1g31330 : 297.0) Encodes subunit F of photosystem I.; photosystem I subunit F (PSAF); FUNCTIONS IN: molecular_function unknown; INVOLVED IN: photosynthesis; LOCATED IN: in 7 components; EXPRESSED IN: 25 plant structures; EXPRESSED DURING: 14 growth stages; CONTAINS InterPro DOMAIN/s: Photosystem I reaction centre protein PsaF, subunit III (InterPro:IPR003666); Has 387 Blast hits to 387 protein…
Bin: 1.1.2.2	PS.lightreaction.photosystem I.PSI polypeptide subunits
	Id: seq_63
	(at1g03130 : 233.0) Encodes a protein predicted by sequence similarity with spinach PsaD to be photosystem I reaction center subunit II (PsaD2); photosystem I subunit D-2 (PSAD-2); FUNCTIONS IN: molecular_function unknown; INVOLVED IN: photosynthesis; LOCATED IN: in 6 components; EXPRESSED IN: 23 plant structures; EXPRESSED DURING: 14 growth stages; CONTAINS InterPro DOMAIN/s: Photosystem I prote…
Bin: 1.1.2.2	PS.lightreaction.photosystem I.PSI polypeptide subunits
	Id: seq_119
	(gnl|cdd|69027 : 196.0) no description available & (at5g64040 : 194.0) Encodes the only subunit of photosystem I located entirely in the thylakoid lumen. May be involved in the interaction between plastocyanin and the photosystem I complex.; PSAN; FUNCTIONS IN: calmodulin binding; INVOLVED IN: photosynthetic electron transport in photosystem I; LOCATED IN: chloroplast thylakoid membrane, photosys…
Bin: 1.1.2.2	PS.lightreaction.photosystem I.PSI polypeptide subunits
	Id: seq_354
	(q41228|psaea_nicsy : 107.0) Photosystem I reaction center subunit IV A, chloroplast precursor (PSI-E A) [Contains: Photosystem I reaction center subunit IV A isoform 2] - Nicotiana sylvestris (Wood tobacco) & (at2g20260 : 103.0) Encodes subunit E of photosystem I.; photosystem I subunit E-2 (PSAE-2); FUNCTIONS IN: catalytic activity; INVOLVED IN: photosynthesis; LOCATED IN: thylakoid, chloroplas…
Bin: 1.1.2.2	PS.lightreaction.photosystem I.PSI polypeptide subunits
	Id: seq_528
	(gnl|cdd|66888 : 208.0) no description available & (at1g52230 : 169.0) photosystem I subunit H2 (PSAH2); FUNCTIONS IN: molecular_function unknown; INVOLVED IN: photosynthesis; LOCATED IN: in 6 components; EXPRESSED IN: 21 plant structures; EXPRESSED DURING: 13 growth stages; CONTAINS InterPro DOMAIN/s: Photosystem I reaction centre subunit VI (InterPro:IPR004928); BEST Arabidopsis thaliana protei…
Bin: 1.1.2.1	PS.lightreaction.photosystem I.LHC-I
	Id: seq_1194
	(at1g61520 : 160.0) PSI type III chlorophyll a/b-binding protein (Lhca3*1); photosystem I light harvesting complex gene 3 (LHCA3); FUNCTIONS IN: chlorophyll binding; INVOLVED IN: photosynthesis, light harvesting, photosynthesis; LOCATED IN: light-harvesting complex, chloroplast thylakoid membrane, plastoglobule; EXPRESSED IN: 23 plant structures; EXPRESSED DURING: 14 growth stages; CONTAINS Inter…
Bin: 1.1.2.1	PS.lightreaction.photosystem I.LHC-I
	Id: seq_1728
	(at1g61520 : 172.0) PSI type III chlorophyll a/b-binding protein (Lhca3*1); photosystem I light harvesting complex gene 3 (LHCA3); FUNCTIONS IN: chlorophyll binding; INVOLVED IN: photosynthesis, light harvesting, photosynthesis; LOCATED IN: light-harvesting complex, chloroplast thylakoid membrane, plastoglobule; EXPRESSED IN: 23 plant structures; EXPRESSED DURING: 14 growth stages; CONTAINS Inter…
Bin: 1.1.1.3	PS.lightreaction.photosystem II.biogenesis
	Id: seq_1085
	(q5z5a8|p2saf_orysa : 560.0) Photosystem II stability/assembly factor HCF136, chloroplast precursor - Oryza sativa (Rice) & (at5g23120 : 559.0) encodes a stability and/or assembly factor of photosystem II; HIGH CHLOROPHYLL FLUORESCENCE 136 (HCF136); INVOLVED IN: response to cadmium ion, plastid organization, protein complex assembly; LOCATED IN: in 8 components; EXPRESSED IN: 25 plant structures;…
Bin: 1.1.1.2	PS.lightreaction.photosystem II.PSII polypeptide subunits
	Id: seq_26
	(q40459|psbo_tobac : 527.0) Oxygen-evolving enhancer protein 1, chloroplast precursor (OEE1) (33 kDa subunit of oxygen evolving system of photosystem II) (OEC 33 kDa subunit) (33 kDa thylakoid membrane protein) - Nicotiana tabacum (Common tobacco) & (at3g50820 : 492.0) Encodes a protein which is an extrinsic subunit of photosystem II and which has been proposed to play a central role in stabiliza…
Bin: 1.1.1.2	PS.lightreaction.photosystem II.PSII polypeptide subunits
	Id: seq_27
	(p16059|psbp_pea : 391.0) Oxygen-evolving enhancer protein 2, chloroplast precursor (OEE2) (23 kDa subunit of oxygen evolving system of photosystem II) (OEC 23 kDa subunit) (23 kDa thylakoid membrane protein) - Pisum sativum (Garden pea) & (at1g06680 : 374.0) Encodes a 23 kD extrinsic protein that is part of photosystem II and participates in the regulation of oxygen evolution.; photosystem II su…
Bin: 1.1.1.2	PS.lightreaction.photosystem II.PSII polypeptide subunits
	Id: seq_82
	(at4g05180 : 177.0) Encodes the PsbQ subunit of the oxygen evolving complex of photosystem II.; photosystem II subunit Q-2 (PSBQ-2); FUNCTIONS IN: calcium ion binding; INVOLVED IN: peptidyl-cysteine S-nitrosylation; LOCATED IN: in 9 components; EXPRESSED IN: 23 plant structures; EXPRESSED DURING: 14 growth stages; CONTAINS InterPro DOMAIN/s: Photosystem II oxygen evolving complex protein PsbQ (In…
Bin: 1.1.1.2	PS.lightreaction.photosystem II.PSII polypeptide subunits
	Id: seq_230
	(at1g03600 : 166.0) PSB27; FUNCTIONS IN: molecular_function unknown; INVOLVED IN: photosystem II repair; LOCATED IN: thylakoid, chloroplast thylakoid membrane, chloroplast thylakoid lumen, chloroplast photosystem II, chloroplast; EXPRESSED IN: 23 plant structures; EXPRESSED DURING: 13 growth stages; Has 273 Blast hits to 273 proteins in 82 species: Archae - 0; Bacteria - 114; Metazoa - 0; Fungi -…
Bin: 1.1.1.2	PS.lightreaction.photosystem II.PSII polypeptide subunits
	Id: seq_322
	(q02060|psbs_spiol : 330.0) Photosystem II 22 kDa protein, chloroplast precursor (CP22) - Spinacia oleracea (Spinach) & (at1g44575 : 298.0) Encoding PSII-S (CP22), a ubiquitous pigment-binding protein associated with photosystem II (PSII) of higher plants. Involved in nonphotochemical quenching rather than in photosynthesis. Mutant has a normal violaxanthin cycle but has a limited capacity of que…
Bin: 1.1.1.2	PS.lightreaction.photosystem II.PSII polypeptide subunits
	Id: seq_1355
	(gnl|cdd|79283 : 118.0) no description available & (q9xqr3|psbh_pea : 117.0) Photosystem II reaction center protein H (PSII-H) (Photosystem II 10 kDa phosphoprotein) - Pisum sativum (Garden pea) & (atcg00710 : 111.0) Encodes a 8 kD phosphoprotein that is a component of the photosystem II oxygen evolving core. Its exact molecular function has not been determined but it may play a role in mediating…
Bin: 1.1.1.2	PS.lightreaction.photosystem II.PSII polypeptide subunits
	Id: seq_1388
	(at3g56650 : 333.0) Mog1/PsbP/DUF1795-like photosystem II reaction center PsbP family protein; FUNCTIONS IN: calcium ion binding; INVOLVED IN: photosynthesis; LOCATED IN: thylakoid, thylakoid lumen, chloroplast thylakoid lumen, chloroplast stroma, chloroplast; EXPRESSED IN: 21 plant structures; EXPRESSED DURING: 14 growth stages; CONTAINS InterPro DOMAIN/s: Photosystem II oxygen evolving complex …
Bin: 1.1.1.2	PS.lightreaction.photosystem II.PSII polypeptide subunits
	Id: seq_1663
	(at3g55330 : 208.0) PsbP-like protein 1 (PPL1); FUNCTIONS IN: calcium ion binding; INVOLVED IN: photosynthesis; LOCATED IN: in 6 components; EXPRESSED IN: 24 plant structures; EXPRESSED DURING: 14 growth stages; CONTAINS InterPro DOMAIN/s: Photosystem II oxygen evolving complex protein PsbP (InterPro:IPR002683), Mog1/PsbP/DUF1795, alpha/beta/alpha sandwich (InterPro:IPR016124), Mog1/PsbP, alpha/b…
Bin: 1.1.1.2	PS.lightreaction.photosystem II.PSII polypeptide subunits
	Id: seq_1762
	(at4g15510 : 301.0) Photosystem II reaction center PsbP family protein; FUNCTIONS IN: calcium ion binding; INVOLVED IN: photosynthesis; LOCATED IN: in 6 components; EXPRESSED IN: 21 plant structures; EXPRESSED DURING: 14 growth stages; CONTAINS InterPro DOMAIN/s: Photosystem II oxygen evolving complex protein PsbP (InterPro:IPR002683), Mog1/PsbP/DUF1795, alpha/beta/alpha sandwich (InterPro:IPR016…
Bin: 1.1.1.2	PS.lightreaction.photosystem II.PSII polypeptide subunits
	Id: seq_1832
	(gnl|cdd|79222 : 673.0) no description available & (atcg00020 : 650.0) Encodes chlorophyll binding protein D1, a part of the photosystem II reaction center core; photosystem II reaction center protein A (PSBA); FUNCTIONS IN: chlorophyll binding; INVOLVED IN: photosynthesis, light reaction; LOCATED IN: in 6 components; EXPRESSED IN: 24 plant structures; EXPRESSED DURING: 14 growth stages; CONTAINS…
Bin: 1.1.1.2	PS.lightreaction.photosystem II.PSII polypeptide subunits
	Id: seq_1840
	(at4g05180 : 113.0) Encodes the PsbQ subunit of the oxygen evolving complex of photosystem II.; photosystem II subunit Q-2 (PSBQ-2); FUNCTIONS IN: calcium ion binding; INVOLVED IN: peptidyl-cysteine S-nitrosylation; LOCATED IN: in 9 components; EXPRESSED IN: 23 plant structures; EXPRESSED DURING: 14 growth stages; CONTAINS InterPro DOMAIN/s: Photosystem II oxygen evolving complex protein PsbQ (In…
Bin: 1.1.1.2	PS.lightreaction.photosystem II.PSII polypeptide subunits
	Id: seq_1968
	(gnl|cdd|79279 : 655.0) no description available & (p06411|psbb_tobac : 637.0) Photosystem II P680 chlorophyll A apoprotein (CP-47 protein) - Nicotiana tabacum (Common tobacco) & (atcg00680 : 635.0) encodes for CP47, subunit of the photosystem II reaction center.; photosystem II reaction center protein B (PSBB); FUNCTIONS IN: chlorophyll binding; INVOLVED IN: photosynthesis, light reaction, photo…
Bin: 1.1.1.2	PS.lightreaction.photosystem II.PSII polypeptide subunits
	Id: seq_2091
	(at1g76450 : 142.0) Photosystem II reaction center PsbP family protein; FUNCTIONS IN: calcium ion binding; INVOLVED IN: photosynthesis; LOCATED IN: thylakoid, thylakoid lumen, chloroplast thylakoid membrane, chloroplast thylakoid lumen, chloroplast; EXPRESSED IN: 23 plant structures; EXPRESSED DURING: 14 growth stages; CONTAINS InterPro DOMAIN/s: Photosystem II oxygen evolving complex protein Psb…
Bin: 1.1.1.2	PS.lightreaction.photosystem II.PSII polypeptide subunits
	Id: seq_2124
	(gnl|cdd|79253 : 925.0) no description available & (p06413|psbc_tobac : 839.0) Photosystem II 44 kDa reaction center protein (P6 protein) (CP43) - Nicotiana tabacum (Common tobacco) & (atcg00280 : 832.0) chloroplast gene encoding a CP43 subunit of the photosystem II reaction center. promoter contains a blue-light responsive element.; photosystem II reaction center protein C (PSBC); FUNCTIONS IN: …
Bin: 1.1.1.1	PS.lightreaction.photosystem II.LHC-II
	Id: seq_25
	(p27495|cb24_tobac : 454.0) Chlorophyll a-b binding protein 40, chloroplast precursor (LHCII type I CAB-40) (LHCP) - Nicotiana tabacum (Common tobacco) & (at2g34420 : 431.0) Photosystem II type I chlorophyll a/b-binding protein; photosystem II light harvesting complex gene B1B2 (LHB1B2); FUNCTIONS IN: chlorophyll binding; INVOLVED IN: photosynthesis, light harvesting in photosystem II, photosynth…
Bin: 1.1.1.1	PS.lightreaction.photosystem II.LHC-II
	Id: seq_29
	(at3g08940 : 471.0) Lhcb4.2 protein (Lhcb4.2, protein involved in the light harvesting complex of photosystem II; light harvesting complex photosystem II (LHCB4.2); FUNCTIONS IN: chlorophyll binding; INVOLVED IN: response to blue light, response to red light, response to far red light; LOCATED IN: thylakoid, chloroplast thylakoid membrane, chloroplast, membrane, chloroplast envelope; EXPRESSED IN…
Bin: 1.1.1.1	PS.lightreaction.photosystem II.LHC-II
	Id: seq_136
	(at1g15820 : 391.0) Lhcb6 protein (Lhcb6), light harvesting complex of photosystem II.; light harvesting complex photosystem II subunit 6 (LHCB6); FUNCTIONS IN: chlorophyll binding; INVOLVED IN: photosynthesis, nonphotochemical quenching; LOCATED IN: in 7 components; EXPRESSED IN: 24 plant structures; EXPRESSED DURING: 14 growth stages; CONTAINS InterPro DOMAIN/s: Chlorophyll A-B binding protein …
Bin: 1.1.1.1	PS.lightreaction.photosystem II.LHC-II
	Id: seq_694
	(at4g10340 : 282.0) photosystem II encoding the light-harvesting chlorophyll a/b binding protein CP26 of the antenna system of the photosynthetic apparatus; light harvesting complex of photosystem II 5 (LHCB5); FUNCTIONS IN: chlorophyll binding; INVOLVED IN: response to blue light, response to red light, response to far red light, photosynthesis, nonphotochemical quenching; LOCATED IN: in 9 compo…
Bin: 1.1.1.1	PS.lightreaction.photosystem II.LHC-II
	Id: seq_1410
	(at4g10340 : 89.4) photosystem II encoding the light-harvesting chlorophyll a/b binding protein CP26 of the antenna system of the photosynthetic apparatus; light harvesting complex of photosystem II 5 (LHCB5); FUNCTIONS IN: chlorophyll binding; INVOLVED IN: response to blue light, response to red light, response to far red light, photosynthesis, nonphotochemical quenching; LOCATED IN: in 9 compon…
Bin: 1.1.1.1	PS.lightreaction.photosystem II.LHC-II
	Id: seq_1411
	(at4g10340 : 82.8) photosystem II encoding the light-harvesting chlorophyll a/b binding protein CP26 of the antenna system of the photosynthetic apparatus; light harvesting complex of photosystem II 5 (LHCB5); FUNCTIONS IN: chlorophyll binding; INVOLVED IN: response to blue light, response to red light, response to far red light, photosynthesis, nonphotochemical quenching; LOCATED IN: in 9 compon…
Bin: 1.1.1.1	PS.lightreaction.photosystem II.LHC-II
	Id: seq_1738
	(p27519|cb23_orysa : 192.0) Chlorophyll a-b binding protein, chloroplast precursor (LHCII type I CAB) (LHCP) - Oryza sativa (Rice) & (at3g27690 : 186.0) Encodes Lhcb2.4. Belongs to the Lhc super-gene family encodes the light-harvesting chlorophyll a/b-binding (LHC) proteins that constitute the antenna system of the photosynthetic apparatus.; photosystem II light harvesting complex gene 2.3 (LHCB2…
Bin: 1.1.1.1	PS.lightreaction.photosystem II.LHC-II
	Id: seq_1739
	(at4g10340 : 146.0) photosystem II encoding the light-harvesting chlorophyll a/b binding protein CP26 of the antenna system of the photosynthetic apparatus; light harvesting complex of photosystem II 5 (LHCB5); FUNCTIONS IN: chlorophyll binding; INVOLVED IN: response to blue light, response to red light, response to far red light, photosynthesis, nonphotochemical quenching; LOCATED IN: in 9 compo…
Bin: 1.1.1.1	PS.lightreaction.photosystem II.LHC-II
	Id: seq_1828
	(p08221|cb21_cucsa : 284.0) Chlorophyll a-b binding protein of LHCII type I, chloroplast precursor (CAB) (LHCP) (Fragment) - Cucumis sativus (Cucumber) & (at2g05100 : 268.0) Lhcb2.1 protein encoding a subunit of the light harvesting complex II. Member of a gene family with high degree of sequence similarity. Initially LHCB2.3 was considered as a separate gene but appears to be an allele of LHCB2.…
2. major CHO metabolism
Bin: 2.2.2.10	major CHO metabolism.degradation.starch.laforin like phosphoglucan phosphatase (SEX4)
	Id: seq_886
	(at3g52180 : 479.0) Encodes a plant-specific protein phosphatase that contains a protein tyrosine phosphatase (PTP) catalytic domain and a kinase interaction sequence (KIS) domain. This protein interacts with the plant SnRK AKIN11. Binds starch. Localized in the chloroplast.; STARCH-EXCESS 4 (SEX4); FUNCTIONS IN: protein tyrosine/serine/threonine phosphatase activity, polysaccharide binding; INVO…
Bin: 2.2.2.10	major CHO metabolism.degradation.starch.laforin like phosphoglucan phosphatase (SEX4)
	Id: seq_1242
	(at3g52180 : 189.0) Encodes a plant-specific protein phosphatase that contains a protein tyrosine phosphatase (PTP) catalytic domain and a kinase interaction sequence (KIS) domain. This protein interacts with the plant SnRK AKIN11. Binds starch. Localized in the chloroplast.; STARCH-EXCESS 4 (SEX4); FUNCTIONS IN: protein tyrosine/serine/threonine phosphatase activity, polysaccharide binding; INVO…
Bin: 2.2.2.10	major CHO metabolism.degradation.starch.laforin like phosphoglucan phosphatase (SEX4)
	Id: seq_1419
	(at3g52180 : 88.6) Encodes a plant-specific protein phosphatase that contains a protein tyrosine phosphatase (PTP) catalytic domain and a kinase interaction sequence (KIS) domain. This protein interacts with the plant SnRK AKIN11. Binds starch. Localized in the chloroplast.; STARCH-EXCESS 4 (SEX4); FUNCTIONS IN: protein tyrosine/serine/threonine phosphatase activity, polysaccharide binding; INVOL…
Bin: 2.2.2.8	major CHO metabolism.degradation.starch.ISA3
	Id: seq_1282
	(at4g09020 : 506.0) Encodes an isoamylase-like protein. Mutant studies show that the gene is strongly involved in starch breakdown. A GUS-protein fusion product was shown to localize to the surface of chloroplastic structures reminiscent of starch granules. In the mutants, the chloroplastic α-amylase AMY3 is upregulated.; isoamylase 3 (ISA3); FUNCTIONS IN: isoamylase activity, alpha-amylase activ…
Bin: 2.2.2.8	major CHO metabolism.degradation.starch.ISA3
	Id: seq_2193
	(at4g09020 : 120.0) Encodes an isoamylase-like protein. Mutant studies show that the gene is strongly involved in starch breakdown. A GUS-protein fusion product was shown to localize to the surface of chloroplastic structures reminiscent of starch granules. In the mutants, the chloroplastic α-amylase AMY3 is upregulated.; isoamylase 3 (ISA3); FUNCTIONS IN: isoamylase activity, alpha-amylase activ…
Bin: 2.2.2.4	major CHO metabolism.degradation.starch.D enzyme
	Id: seq_1156
	(at5g01260 : 152.0) Carbohydrate-binding-like fold; FUNCTIONS IN: carbohydrate binding, catalytic activity; INVOLVED IN: carbohydrate metabolic process; LOCATED IN: cellular_component unknown; EXPRESSED IN: 21 plant structures; EXPRESSED DURING: 13 growth stages; CONTAINS InterPro DOMAIN/s: Immunoglobulin-like fold (InterPro:IPR013783), Carbohydrate-binding-like fold (InterPro:IPR013784), Glycosi…
Bin: 2.2.2.4	major CHO metabolism.degradation.starch.D enzyme
	Id: seq_2207
	(q06801|dpep_soltu : 107.0) 4-alpha-glucanotransferase, chloroplast precursor (EC 2.4.1.25) (Amylomaltase) (Disproportionating enzyme) (D-enzyme) - Solanum tuberosum (Potato) & (at5g64860 : 104.0) Encodes a maltotriose-metabolizing enzyme with chloroplastic α-1,4-glucanotransferase activity. Mutant has altered starch degradation.; disproportionating enzyme (DPE1); FUNCTIONS IN: 4-alpha-glucanotra…
Bin: 2.2.2.3	major CHO metabolism.degradation.starch.glucan water dikinase
	Id: seq_412
	(q9awa5|gwd1_soltu : 1864.0) Alpha-glucan water dikinase, chloroplast precursor (EC 2.7.9.4) (EC 2.7.13.3) (Starch-related R1 protein) - Solanum tuberosum (Potato) & (at1g10760 : 1623.0) Encodes an α-glucan, water dikinase required for starch degradation. Involved in cold-induced freezing tolerance. Mutations that eliminate the GWD protein or affect the dikinase domain of the enzyme dramatically …
Bin: 2.2.2.3	major CHO metabolism.degradation.starch.glucan water dikinase
	Id: seq_1352
	(q9awa5|gwd1_soltu : 260.0) Alpha-glucan water dikinase, chloroplast precursor (EC 2.7.9.4) (EC 2.7.13.3) (Starch-related R1 protein) - Solanum tuberosum (Potato) & (at1g10760 : 244.0) Encodes an α-glucan, water dikinase required for starch degradation. Involved in cold-induced freezing tolerance. Mutations that eliminate the GWD protein or affect the dikinase domain of the enzyme dramatically re…
Bin: 2.2.2.2	major CHO metabolism.degradation.starch.starch phosphorylase
	Id: seq_62
	(ipr000811 : 1500.0) Glycosyl transferase, family 35 & (p53537|phsh_vicfa : 1473.0) Alpha-glucan phosphorylase, H isozyme (EC 2.4.1.1) (Starch phosphorylase H) - Vicia faba (Broad bean) & (at3g46970 : 1442.0) Encodes a cytosolic alpha-glucan phosphorylase. In vitro, the enzyme has a preference for branched polysaccharides, such as glycogen.; alpha-glucan phosphorylase 2 (PHS2); FUNCTIONS IN: phos…
Bin: 2.2.2.2	major CHO metabolism.degradation.starch.starch phosphorylase
	Id: seq_113
	(p53536|phsl_vicfa : 1512.0) Alpha-1,4 glucan phosphorylase L isozyme, chloroplast precursor (EC 2.4.1.1) (Starch phosphorylase L) - Vicia faba (Broad bean) & (at3g29320 : 737.0) Encodes a plastidic alpha-glucan phosphorylase. In vitro, the enzyme has a preference for maltooligosaccharides, such as maltoheptaose.; Glycosyl transferase, family 35; FUNCTIONS IN: phosphorylase activity, transferase …
Bin: 2.2.2.2	major CHO metabolism.degradation.starch.starch phosphorylase
	Id: seq_1493
	(p27598|phsl_ipoba : 137.0) Alpha-1,4 glucan phosphorylase L isozyme, chloroplast precursor (EC 2.4.1.1) (Starch phosphorylase L) - Ipomoea batatas (Sweet potato) (Batate) & (at3g29320 : 136.0) Encodes a plastidic alpha-glucan phosphorylase. In vitro, the enzyme has a preference for maltooligosaccharides, such as maltoheptaose.; Glycosyl transferase, family 35; FUNCTIONS IN: phosphorylase activit…
Bin: 2.2.2.2	major CHO metabolism.degradation.starch.starch phosphorylase
	Id: seq_1764
	(p53536|phsl_vicfa : 291.0) Alpha-1,4 glucan phosphorylase L isozyme, chloroplast precursor (EC 2.4.1.1) (Starch phosphorylase L) - Vicia faba (Broad bean) & (at3g29320 : 279.0) Encodes a plastidic alpha-glucan phosphorylase. In vitro, the enzyme has a preference for maltooligosaccharides, such as maltoheptaose.; Glycosyl transferase, family 35; FUNCTIONS IN: phosphorylase activity, transferase a…
Bin: 2.2.2.1.2	major CHO metabolism.degradation.starch.starch cleavage.beta amylase
	Id: seq_1139
	(o22585|amyb_medsa : 829.0) Beta-amylase (EC 3.2.1.2) (1,4-alpha-D-glucan maltohydrolase) - Medicago sativa (Alfalfa) & (at2g32290 : 717.0) beta-amylase 6 (BAM6); FUNCTIONS IN: cation binding, beta-amylase activity, catalytic activity; INVOLVED IN: cellulose biosynthetic process, carbohydrate metabolic process, polysaccharide catabolic process; LOCATED IN: chloroplast; EXPRESSED IN: 14 plant stru…
Bin: 2.2.2.1.1	major CHO metabolism.degradation.starch.starch cleavage.alpha amylase
	Id: seq_1666
	(p04063|amy2_horvu : 296.0) Alpha-amylase type B isozyme precursor (EC 3.2.1.1) (1,4-alpha-D-glucan glucanohydrolase) (AMY2-2) (High pI alpha-amylase) - Hordeum vulgare (Barley) & (at4g25000 : 295.0) Predicted to be secreted protein based on signalP prediction. Involved in starch mobilization. Mutants are defective in alpha-amylase activity. (Note: AMY1 has been found in the literature to be refe…
Bin: 2.2.2.1.1	major CHO metabolism.degradation.starch.starch cleavage.alpha amylase
	Id: seq_2097
	(at4g25000 : 281.0) Predicted to be secreted protein based on signalP prediction. Involved in starch mobilization. Mutants are defective in alpha-amylase activity. (Note: AMY1 has been found in the literature to be referred to as AMY3, which is not to be confused with AMY3/At1g69830).; alpha-amylase-like (AMY1); FUNCTIONS IN: alpha-amylase activity; INVOLVED IN: response to gibberellin stimulus, …
Bin: 2.2.1.5	major CHO metabolism.degradation.sucrose.Susy
	Id: seq_351
	(ipr000368 : 1500.0) Sucrose synthase & (p13708|susy_soybn : 1493.0) Sucrose synthase (EC 2.4.1.13) (Sucrose-UDP glucosyltransferase) (Nodulin-100) - Glycine max (Soybean) & (at3g43190 : 1409.0) Encodes a protein with sucrose synthase activity (SUS4).; sucrose synthase 4 (SUS4); FUNCTIONS IN: UDP-glycosyltransferase activity, sucrose synthase activity, transferase activity, transferring glycosyl …
Bin: 2.2.1.5	major CHO metabolism.degradation.sucrose.Susy
	Id: seq_379
	(ipr000368 : 1500.0) Sucrose synthase & (at4g02280 : 1015.0) Encodes a protein with sucrose synthase activity (SUS3). It appears to be important for sucrose metabolism in developing seeds, especially during the late maturation phase, about 18 days after flowering.; sucrose synthase 3 (SUS3); CONTAINS InterPro DOMAIN/s: Sucrose synthase, plant/cyanobacteria (InterPro:IPR012820), Sucrose synthase (…
Bin: 2.2.1.4	major CHO metabolism.degradation.sucrose.hexokinase
	Id: seq_699
	(q6q8a5|hxk2_tobac : 764.0) Hexokinase-2, chloroplast precursor (EC 2.7.1.1) (NtHxK2) - Nicotiana tabacum (Common tobacco) & (at1g47840 : 631.0) Encodes a putative hexokinase.; hexokinase 3 (HXK3); CONTAINS InterPro DOMAIN/s: Hexokinase, N-terminal (InterPro:IPR022672), Hexokinase, conserved site (InterPro:IPR019807), Hexokinase, C-terminal (InterPro:IPR022673), Hexokinase (InterPro:IPR001312); B…
Bin: 2.2.1.4	major CHO metabolism.degradation.sucrose.hexokinase
	Id: seq_860
	(q9sek3|hxk1_spiol : 766.0) Hexokinase-1 (EC 2.7.1.1) (SoHxK1) - Spinacia oleracea (Spinach) & (at4g29130 : 761.0) Encodes a hexokinase (HXK1) in the plant glucose-signaling network. Functions as a glucose sensor to interrelate nutrient, light, and hormone signaling networks for controlling growth and development in response to the changing environment.; hexokinase 1 (HXK1); FUNCTIONS IN: fructok…
Bin: 2.2.1.3.3	major CHO metabolism.degradation.sucrose.invertases.vacuolar
	Id: seq_1371
	(p80065|invb_dauca : 798.0) Beta-fructofuranosidase, soluble isoenzyme I precursor (EC 3.2.1.26) (Sucrose hydrolase) (Invertase) (Saccharase) - Daucus carota (Carrot) & (at1g12240 : 721.0) ATBETAFRUCT4; FUNCTIONS IN: hydrolase activity, hydrolyzing O-glycosyl compounds, beta-fructofuranosidase activity; INVOLVED IN: sucrose catabolic process, using beta-fructofuranosidase, carbohydrate metabolic …
Bin: 2.2.1.1	major CHO metabolism.degradation.sucrose.fructokinase
	Id: seq_1353
	(at1g66430 : 487.0) pfkB-like carbohydrate kinase family protein; FUNCTIONS IN: kinase activity, ribokinase activity; INVOLVED IN: D-ribose metabolic process, acetate fermentation, sucrose biosynthetic process, sucrose catabolic process, using beta-fructofuranosidase; LOCATED IN: chloroplast, chloroplast stroma; EXPRESSED IN: 22 plant structures; EXPRESSED DURING: 14 growth stages; CONTAINS Inter…
Bin: 2.2.1.1	major CHO metabolism.degradation.sucrose.fructokinase
	Id: seq_1608
	(at1g06030 : 504.0) pfkB-like carbohydrate kinase family protein; FUNCTIONS IN: kinase activity, ribokinase activity; INVOLVED IN: D-ribose metabolic process, acetate fermentation, sucrose biosynthetic process, sucrose catabolic process, using beta-fructofuranosidase; EXPRESSED IN: guard cell; CONTAINS InterPro DOMAIN/s: Carbohydrate/purine kinase (InterPro:IPR011611), Ribokinase (InterPro:IPR002…
Bin: 2.2.1.1	major CHO metabolism.degradation.sucrose.fructokinase
	Id: seq_1742
	(at1g06030 : 289.0) pfkB-like carbohydrate kinase family protein; FUNCTIONS IN: kinase activity, ribokinase activity; INVOLVED IN: D-ribose metabolic process, acetate fermentation, sucrose biosynthetic process, sucrose catabolic process, using beta-fructofuranosidase; EXPRESSED IN: guard cell; CONTAINS InterPro DOMAIN/s: Carbohydrate/purine kinase (InterPro:IPR011611), Ribokinase (InterPro:IPR002…
Bin: 2.2.1.1	major CHO metabolism.degradation.sucrose.fructokinase
	Id: seq_2065
	(at5g51830 : 239.0) pfkB-like carbohydrate kinase family protein; FUNCTIONS IN: kinase activity, ribokinase activity; INVOLVED IN: response to cadmium ion; LOCATED IN: cellular_component unknown; EXPRESSED IN: 23 plant structures; EXPRESSED DURING: 13 growth stages; CONTAINS InterPro DOMAIN/s: Carbohydrate/purine kinase (InterPro:IPR011611), Ribokinase (InterPro:IPR002139), Carbohydrate/puine kin…
Bin: 2.1.2.3	major CHO metabolism.synthesis.starch.starch branching
	Id: seq_368
	(p30924|glgb_soltu : 583.0) 1,4-alpha-glucan branching enzyme (EC 2.4.1.18) (Starch branching enzyme) (Q-enzyme) - Solanum tuberosum (Potato) & (at5g03650 : 368.0) Encodes starch branching enzyme (E.C.2.4.1.18) similar to SBE2 from maize and rice. Expressed throughout the plant and highest in seedlings and cauline leaves.; starch branching enzyme 2.2 (SBE2.2); FUNCTIONS IN: 1,4-alpha-glucan branc…
Bin: 2.1.2.3	major CHO metabolism.synthesis.starch.starch branching
	Id: seq_1907
	(p30924|glgb_soltu : 153.0) 1,4-alpha-glucan branching enzyme (EC 2.4.1.18) (Starch branching enzyme) (Q-enzyme) - Solanum tuberosum (Potato) & (at2g36390 : 99.8) Encodes a starch branching enzyme (EC.2.4.1.18) similar to SBE2 from maize and rice. Expressed throughout plant tissues.; starch branching enzyme 2.1 (SBE2.1); FUNCTIONS IN: 1,4-alpha-glucan branching enzyme activity; INVOLVED IN: amylo…
Bin: 2.1.2.2	major CHO metabolism.synthesis.starch.starch synthase
	Id: seq_152
	(o82627|ssg1_antma : 992.0) Granule-bound starch synthase 1, chloroplast precursor (EC 2.4.1.21) (Granule-bound starch synthase I) (GBSS-I) - Antirrhinum majus (Garden snapdragon) & (at1g32900 : 918.0) UDP-Glycosyltransferase superfamily protein; FUNCTIONS IN: protein binding, transferase activity, transferring glycosyl groups; INVOLVED IN: biosynthetic process, glucan biosynthetic process; LOCAT…
Bin: 2.1.2.2	major CHO metabolism.synthesis.starch.starch synthase
	Id: seq_366
	(q43847|ssy2_soltu : 1033.0) Granule-bound starch synthase 2, chloroplast precursor (EC 2.4.1.21) (Granule-bound starch synthase II) (SS II) (GBSS-II) - Solanum tuberosum (Potato) & (at3g01180 : 993.0) starch synthase 2 (SS2); FUNCTIONS IN: transferase activity, transferring glycosyl groups; INVOLVED IN: cellulose biosynthetic process, glucan biosynthetic process, biosynthetic process, glycogen b…
Bin: 2.1.2.2	major CHO metabolism.synthesis.starch.starch synthase
	Id: seq_1793
	(q00775|ssg1_soltu : 154.0) Granule-bound starch synthase 1, chloroplast precursor (EC 2.4.1.242) (Granule-bound starch synthase I) (GBSS-I) - Solanum tuberosum (Potato) & (at1g32900 : 147.0) UDP-Glycosyltransferase superfamily protein; FUNCTIONS IN: protein binding, transferase activity, transferring glycosyl groups; INVOLVED IN: biosynthetic process, glucan biosynthetic process; LOCATED IN: chl…
Bin: 2.1.2.1	major CHO metabolism.synthesis.starch.AGPase
	Id: seq_38
	(p52416|glgs1_vicfa : 862.0) Glucose-1-phosphate adenylyltransferase small subunit 1, chloroplast precursor (EC 2.7.7.27) (ADP-glucose synthase) (ADP-glucose pyrophosphorylase) (AGPase B) (Alpha-D-glucose-1-phosphate adenyl transferase) - Vicia faba (Broad bean) & (at5g48300 : 852.0) Encodes the small subunit of ADP-glucose pyrophosphorylase. The small subunit is the catalytic isoform responsible…
Bin: 2.1.2.1	major CHO metabolism.synthesis.starch.AGPase
	Id: seq_186
	(p55233|glgl1_betvu : 852.0) Glucose-1-phosphate adenylyltransferase large subunit, chloroplast precursor (EC 2.7.7.27) (ADP-glucose synthase) (ADP-glucose pyrophosphorylase) (AGPase S) (Alpha-D-glucose-1-phosphate adenyl transferase) - Beta vulgaris (Sugar beet) & (at1g27680 : 819.0) ADP-glucose pyrophosphorylase catalyzes the first, rate limiting step in starch biosynthesis. The large subunit p…
Bin: 2.1.2.1	major CHO metabolism.synthesis.starch.AGPase
	Id: seq_474
	(at5g19220 : 374.0) Encodes the large subunit of ADP-glucose pyrophosphorylase which catalyzes the first, rate limiting step in starch biosynthesis. The large subunit plays a regulatory role whereas the small subunit (ApS) is the catalytic isoform. Four isoforms (ApL1-4) have been identified. ApL1 is the major large subunit isoform present in leaves. Mutational analysis of APS1 suggests that APL1…
Bin: 2.1.2.1	major CHO metabolism.synthesis.starch.AGPase
	Id: seq_921
	(q00081|glgl1_soltu : 802.0) Glucose-1-phosphate adenylyltransferase large subunit 1 (EC 2.7.7.27) (ADP-glucose synthase) (ADP-glucose pyrophosphorylase) (AGPase S) (Alpha-D-glucose-1-phosphate adenyl transferase) (Fragment) - Solanum tuberosum (Potato) & (at4g39210 : 798.0) Encodes the large subunit of ADP-Glucose Pyrophosphorylase which catalyzes the first, rate limiting step in starch biosynth…
Bin: 2.1.2.1	major CHO metabolism.synthesis.starch.AGPase
	Id: seq_1269
	(at5g19220 : 409.0) Encodes the large subunit of ADP-glucose pyrophosphorylase which catalyzes the first, rate limiting step in starch biosynthesis. The large subunit plays a regulatory role whereas the small subunit (ApS) is the catalytic isoform. Four isoforms (ApL1-4) have been identified. ApL1 is the major large subunit isoform present in leaves. Mutational analysis of APS1 suggests that APL1…
Bin: 2.1.1.3	major CHO metabolism.synthesis.sucrose.FBPase
	Id: seq_619
	(q42649|f16p2_betvu : 641.0) Fructose-1,6-bisphosphatase, cytosolic (EC 3.1.3.11) (D-fructose-1,6-bisphosphate 1-phosphohydrolase) (FBPase) - Beta vulgaris (Sugar beet) & (at1g43670 : 624.0) Inositol monophosphatase family protein; FUNCTIONS IN: fructose 1,6-bisphosphate 1-phosphatase activity, phosphoric ester hydrolase activity; INVOLVED IN: carbohydrate metabolic process, fructose metabolic pr…
Bin: 2.1.1.2	major CHO metabolism.synthesis.sucrose.SPP
	Id: seq_302
	(at2g35840 : 650.0) Sucrose-6F-phosphate phosphohydrolase family protein; FUNCTIONS IN: phosphatase activity, magnesium ion binding, sucrose-phosphatase activity, catalytic activity; INVOLVED IN: sucrose biosynthetic process; LOCATED IN: nucleus, cytoplasm; EXPRESSED IN: 24 plant structures; EXPRESSED DURING: 13 growth stages; CONTAINS InterPro DOMAIN/s: Sucrose-phosphate synthase (InterPro:IPR00…
3. minor CHO metabolism
Bin: 3.99	minor CHO metabolism.misc
	Id: seq_249
	(at5g36700 : 515.0) 2-phosphoglycolate phosphatase 1 (PGLP1); FUNCTIONS IN: phosphoglycolate phosphatase activity; INVOLVED IN: metabolic process; EXPRESSED IN: 7 plant structures; CONTAINS InterPro DOMAIN/s: HAD-superfamily hydrolase, subfamily IIA (InterPro:IPR006357), 2-phosphoglycolate phosphatase, eukaryotic (InterPro:IPR006349); BEST Arabidopsis thaliana protein match is: Haloacid dehalogen…
Bin: 3.8.2	minor CHO metabolism.galactose.alpha-galactosidases
	Id: seq_986
	(at5g08380 : 640.0) alpha-galactosidase 1 (AGAL1); FUNCTIONS IN: alpha-galactosidase activity, hydrolase activity, hydrolyzing O-glycosyl compounds, catalytic activity; INVOLVED IN: carbohydrate metabolic process, metabolic process, lactose catabolic process; LOCATED IN: apoplast, cell wall, plant-type cell wall; EXPRESSED IN: 21 plant structures; EXPRESSED DURING: 13 growth stages; CONTAINS Inte…
Bin: 3.8.2	minor CHO metabolism.galactose.alpha-galactosidases
	Id: seq_1142
	(at3g56310 : 357.0) Melibiase family protein; FUNCTIONS IN: alpha-galactosidase activity, hydrolase activity, hydrolyzing O-glycosyl compounds, catalytic activity; INVOLVED IN: carbohydrate metabolic process, metabolic process; LOCATED IN: vacuole; EXPRESSED IN: 24 plant structures; EXPRESSED DURING: 15 growth stages; CONTAINS InterPro DOMAIN/s: Aldolase-type TIM barrel (InterPro:IPR013785), Glyc…
Bin: 3.8.2	minor CHO metabolism.galactose.alpha-galactosidases
	Id: seq_1275
	(at5g08380 : 445.0) alpha-galactosidase 1 (AGAL1); FUNCTIONS IN: alpha-galactosidase activity, hydrolase activity, hydrolyzing O-glycosyl compounds, catalytic activity; INVOLVED IN: carbohydrate metabolic process, metabolic process, lactose catabolic process; LOCATED IN: apoplast, cell wall, plant-type cell wall; EXPRESSED IN: 21 plant structures; EXPRESSED DURING: 13 growth stages; CONTAINS Inte…
Bin: 3.8.1	minor CHO metabolism.galactose.galactokinases
	Id: seq_811
	(at3g06580 : 586.0) Encodes a protein with galactose kinase activity. The gene was shown to complement the yeast ƒgal1 mutant defective in the galactokinase gene GAL1.; GALK; FUNCTIONS IN: ATP binding, galactokinase activity; INVOLVED IN: galactose metabolic process, carbohydrate phosphorylation; LOCATED IN: cytoplasm; EXPRESSED IN: 26 plant structures; EXPRESSED DURING: 15 growth stages; CONTAIN…
Bin: 3.8.1	minor CHO metabolism.galactose.galactokinases
	Id: seq_1780
	(at3g06580 : 152.0) Encodes a protein with galactose kinase activity. The gene was shown to complement the yeast ƒgal1 mutant defective in the galactokinase gene GAL1.; GALK; FUNCTIONS IN: ATP binding, galactokinase activity; INVOLVED IN: galactose metabolic process, carbohydrate phosphorylation; LOCATED IN: cytoplasm; EXPRESSED IN: 26 plant structures; EXPRESSED DURING: 15 growth stages; CONTAIN…
Bin: 3.8.1	minor CHO metabolism.galactose.galactokinases
	Id: seq_1998
	(at3g06580 : 238.0) Encodes a protein with galactose kinase activity. The gene was shown to complement the yeast ƒgal1 mutant defective in the galactokinase gene GAL1.; GALK; FUNCTIONS IN: ATP binding, galactokinase activity; INVOLVED IN: galactose metabolic process, carbohydrate phosphorylation; LOCATED IN: cytoplasm; EXPRESSED IN: 26 plant structures; EXPRESSED DURING: 15 growth stages; CONTAIN…
Bin: 3.7	minor CHO metabolism.sugar kinases
	Id: seq_885
	(at5g49650 : 897.0) Encodes a cytosolic protein capable of phosphorylating xylulose and deoxy-xylulose. It most likely plays a role in producing precursors for isoprenoid biosynthesis.; xylulose kinase-2 (XK-2); FUNCTIONS IN: xylulokinase activity; INVOLVED IN: xylulose metabolic process; LOCATED IN: cytosol; EXPRESSED IN: 23 plant structures; EXPRESSED DURING: 13 growth stages; CONTAINS InterPro…
Bin: 3.5.1	minor CHO metabolism.others.Xylose isomerase
	Id: seq_387
	(at5g57655 : 854.0) xylose isomerase family protein; FUNCTIONS IN: xylose isomerase activity; INVOLVED IN: carbohydrate metabolic process; LOCATED IN: endoplasmic reticulum, plasma membrane, vacuole; EXPRESSED IN: 25 plant structures; EXPRESSED DURING: 14 growth stages; CONTAINS InterPro DOMAIN/s: Xylose isomerase-like, TIM barrel domain (InterPro:IPR013022), Xylose isomerase, bacterial type (Int…
Bin: 3.5	minor CHO metabolism.others
	Id: seq_440
	(at3g17940 : 476.0) Galactose mutarotase-like superfamily protein; FUNCTIONS IN: isomerase activity, carbohydrate binding, aldose 1-epimerase activity, catalytic activity; INVOLVED IN: galactose metabolic process, hexose metabolic process, carbohydrate metabolic process; LOCATED IN: cellular_component unknown; EXPRESSED IN: 25 plant structures; EXPRESSED DURING: 16 growth stages; CONTAINS InterPr…
Bin: 3.5	minor CHO metabolism.others
	Id: seq_447
	(at2g37770 : 508.0) NAD(P)-linked oxidoreductase superfamily protein; FUNCTIONS IN: oxidoreductase activity; INVOLVED IN: oxidation reduction; EXPRESSED IN: 12 plant structures; EXPRESSED DURING: LP.04 four leaves visible, 4 anthesis, petal differentiation and expansion stage; CONTAINS InterPro DOMAIN/s: Aldo/keto reductase (InterPro:IPR001395), Aldo/keto reductase subgroup (InterPro:IPR020471), …
Bin: 3.5	minor CHO metabolism.others
	Id: seq_611
	(at5g53850 : 795.0) haloacid dehalogenase-like hydrolase family protein; FUNCTIONS IN: hydrolase activity, ion binding, methylthioribulose 1-phosphate dehydratase activity, metal ion binding; INVOLVED IN: L-methionine salvage; LOCATED IN: chloroplast; EXPRESSED IN: 23 plant structures; EXPRESSED DURING: 13 growth stages; CONTAINS InterPro DOMAIN/s: Class II aldolase/adducin, N-terminal (InterPro:…
Bin: 3.5	minor CHO metabolism.others
	Id: seq_662
	(at3g17770 : 832.0) Dihydroxyacetone kinase; FUNCTIONS IN: glycerone kinase activity, ATP binding; INVOLVED IN: glycerol metabolic process; LOCATED IN: cellular_component unknown; EXPRESSED IN: 24 plant structures; EXPRESSED DURING: 15 growth stages; CONTAINS InterPro DOMAIN/s: Dak phosphatase (InterPro:IPR004007), Dihydroxyacetone kinase (InterPro:IPR012734), Dak kinase (InterPro:IPR004006); BES…
Bin: 3.5	minor CHO metabolism.others
	Id: seq_841
	(at1g17160 : 445.0) pfkB-like carbohydrate kinase family protein; FUNCTIONS IN: kinase activity, ribokinase activity; INVOLVED IN: D-ribose metabolic process; LOCATED IN: chloroplast; EXPRESSED IN: 23 plant structures; EXPRESSED DURING: 13 growth stages; CONTAINS InterPro DOMAIN/s: Carbohydrate/purine kinase (InterPro:IPR011611), Ribokinase (InterPro:IPR002139), Carbohydrate/puine kinase, PfkB, c…
Bin: 3.5	minor CHO metabolism.others
	Id: seq_1239
	(at5g15140 : 211.0) Galactose mutarotase-like superfamily protein; FUNCTIONS IN: aldose 1-epimerase activity; INVOLVED IN: galactose metabolic process, hexose metabolic process, carbohydrate metabolic process; LOCATED IN: endomembrane system; EXPRESSED IN: 11 plant structures; EXPRESSED DURING: 7 growth stages; CONTAINS InterPro DOMAIN/s: Glycoside hydrolase-type carbohydrate-binding (InterPro:IP…
Bin: 3.5	minor CHO metabolism.others
	Id: seq_1852
	(at5g14500 : 236.0) aldose 1-epimerase family protein; FUNCTIONS IN: carbohydrate binding, isomerase activity, aldose 1-epimerase activity, catalytic activity; INVOLVED IN: galactose metabolic process, carbohydrate metabolic process; LOCATED IN: cellular_component unknown; EXPRESSED IN: 22 plant structures; EXPRESSED DURING: 13 growth stages; CONTAINS InterPro DOMAIN/s: Glycoside hydrolase-type c…
Bin: 3.5	minor CHO metabolism.others
	Id: seq_1890
	(at5g57330 : 164.0) Galactose mutarotase-like superfamily protein; FUNCTIONS IN: isomerase activity, carbohydrate binding, aldose 1-epimerase activity, catalytic activity; INVOLVED IN: galactose metabolic process, carbohydrate metabolic process; LOCATED IN: cellular_component unknown; EXPRESSED IN: 26 plant structures; EXPRESSED DURING: 15 growth stages; CONTAINS InterPro DOMAIN/s: Glycoside hydr…
Bin: 3.4.5	minor CHO metabolism.myo-inositol.inositol phosphatase
	Id: seq_543
	(o49071|impp_mescr : 444.0) Inositol monophosphatase (EC 3.1.3.25) (IMPase) (IMP) (Inositol-1(or 4)-monophosphatase) - Mesembryanthemum crystallinum (Common ice plant) & (at3g02870 : 441.0) Encodes a L-galactose-1-phosphate phosphatase, involved in ascorbate biosynthesis.; VTC4; FUNCTIONS IN: 3'(2'),5'-bisphosphate nucleotidase activity, L-galactose-1-phosphate phosphatase activity, inositol or p…
Bin: 3.4.5	minor CHO metabolism.myo-inositol.inositol phosphatase
	Id: seq_1782
	(at1g31190 : 81.3) Encodes a myo-inositol monophosphatase IMPL1 (myo-Inositol monophosphatase like 1).; myo-inositol monophosphatase like 1 (IMPL1); FUNCTIONS IN: 3'(2'),5'-bisphosphate nucleotidase activity, inositol or phosphatidylinositol phosphatase activity, inositol-1(or 4)-monophosphatase activity; INVOLVED IN: sulfur metabolic process; LOCATED IN: chloroplast, chloroplast stroma; EXPRESSE…
Bin: 3.4.3	minor CHO metabolism.myo-inositol.InsP Synthases
	Id: seq_1500
	(o64437|ino1_orysa : 249.0) Inositol-3-phosphate synthase (EC 5.5.1.4) (Myo-inositol-1-phosphate synthase) (MI-1-P synthase) (IPS) - Oryza sativa (Rice) & (at5g10170 : 243.0) myo-inositol-1-phosphate synthase isoform 3.Expressed in leaf, root and silique. Immunolocaliazation experiments with an antibody recognizing MIPS1, MIPS2, and MIPS3 showed endosperm localization.; myo-inositol-1-phosphate s…
Bin: 3.3	minor CHO metabolism.sugar alcohols
	Id: seq_938
	(at5g51970 : 634.0) Encodes a putative sorbitol dehydrogenase that can be thiolated in vitro.; GroES-like zinc-binding alcohol dehydrogenase family protein; FUNCTIONS IN: oxidoreductase activity, zinc ion binding; INVOLVED IN: oxidation reduction; EXPRESSED IN: 24 plant structures; EXPRESSED DURING: 15 growth stages; CONTAINS InterPro DOMAIN/s: GroES-like (InterPro:IPR011032), Alcohol dehydrogena…
Bin: 3.3	minor CHO metabolism.sugar alcohols
	Id: seq_1553
	(at5g51970 : 145.0) Encodes a putative sorbitol dehydrogenase that can be thiolated in vitro.; GroES-like zinc-binding alcohol dehydrogenase family protein; FUNCTIONS IN: oxidoreductase activity, zinc ion binding; INVOLVED IN: oxidation reduction; EXPRESSED IN: 24 plant structures; EXPRESSED DURING: 15 growth stages; CONTAINS InterPro DOMAIN/s: GroES-like (InterPro:IPR011032), Alcohol dehydrogena…
Bin: 3.3	minor CHO metabolism.sugar alcohols
	Id: seq_1691
	(at5g51970 : 269.0) Encodes a putative sorbitol dehydrogenase that can be thiolated in vitro.; GroES-like zinc-binding alcohol dehydrogenase family protein; FUNCTIONS IN: oxidoreductase activity, zinc ion binding; INVOLVED IN: oxidation reduction; EXPRESSED IN: 24 plant structures; EXPRESSED DURING: 15 growth stages; CONTAINS InterPro DOMAIN/s: GroES-like (InterPro:IPR011032), Alcohol dehydrogena…
4. glycolysis
Bin: 4.3.12	glycolysis.unclear/dually targeted.phosphoglycerate mutase
	Id: seq_1478
	(at5g22620 : 629.0) phosphoglycerate/bisphosphoglycerate mutase family protein; FUNCTIONS IN: catalytic activity; INVOLVED IN: metabolic process; LOCATED IN: chloroplast; EXPRESSED IN: 22 plant structures; EXPRESSED DURING: 13 growth stages; CONTAINS InterPro DOMAIN/s: Histidine phosphatase superfamily, clade-1 (InterPro:IPR013078), Phosphoglycerate/bisphosphoglycerate mutase, active site (InterP…
Bin: 4.3.10	glycolysis.unclear/dually targeted.aldolase
	Id: seq_101
	(gnl|cdd|84661 : 616.0) no description available & (gnl|cdd|36770 : 597.0) no description available & (at2g36460 : 586.0) Aldolase superfamily protein; FUNCTIONS IN: copper ion binding; INVOLVED IN: response to salt stress, pentose-phosphate shunt; LOCATED IN: mitochondrion, plasma membrane, membrane; EXPRESSED IN: 24 plant structures; EXPRESSED DURING: 14 growth stages; CONTAINS InterPro DOMAIN/…
Bin: 4.3.10	glycolysis.unclear/dually targeted.aldolase
	Id: seq_1089
	(p46256|alf1_pea : 353.0) Fructose-bisphosphate aldolase, cytoplasmic isozyme 1 (EC 4.1.2.13) - Pisum sativum (Garden pea) & (at4g26530 : 338.0) Aldolase superfamily protein; FUNCTIONS IN: fructose-bisphosphate aldolase activity; INVOLVED IN: glycolysis, metabolic process; EXPRESSED IN: 17 plant structures; EXPRESSED DURING: 11 growth stages; CONTAINS InterPro DOMAIN/s: Aldolase-type TIM barrel (…
Bin: 4.3.10	glycolysis.unclear/dually targeted.aldolase
	Id: seq_1775
	(gnl|cdd|84661 : 137.0) no description available & (p46256|alf1_pea : 134.0) Fructose-bisphosphate aldolase, cytoplasmic isozyme 1 (EC 4.1.2.13) - Pisum sativum (Garden pea) & (gnl|cdd|36770 : 133.0) no description available & (at4g26530 : 126.0) Aldolase superfamily protein; FUNCTIONS IN: fructose-bisphosphate aldolase activity; INVOLVED IN: glycolysis, metabolic process; EXPRESSED IN: 17 plant …
Bin: 4.2.14	glycolysis.plastid branch.pyruvate kinase (PK)
	Id: seq_799
	(q43117|kpya_ricco : 850.0) Pyruvate kinase isozyme A, chloroplast precursor (EC 2.7.1.40) - Ricinus communis (Castor bean) & (at3g22960 : 821.0) encodes a chloroplast pyruvate kinase alpha subunit. Important for seed oil biosynthesis. Ubiquitously expressed, with significantly increased expression in maturing seeds.; PKP-ALPHA; FUNCTIONS IN: pyruvate kinase activity; INVOLVED IN: response to cad…
Bin: 4.2.14	glycolysis.plastid branch.pyruvate kinase (PK)
	Id: seq_849
	(q40546|kpyg_tobac : 826.0) Pyruvate kinase isozyme G, chloroplast precursor (EC 2.7.1.40) - Nicotiana tabacum (Common tobacco) & (at1g32440 : 793.0) encodes a chloroplast pyruvate kinase beta subunit. The enzyme is less active than the other chloroplast pyruvate kinase beta subunit encoded by AT5G52920. Involved in seed oil biosynthesis. Can partially complement the AT5G52920 mutant.; plastidial…
Bin: 4.2.14	glycolysis.plastid branch.pyruvate kinase (PK)
	Id: seq_1348
	(at5g52920 : 919.0) encodes a dominant chloroplast pyruvate kinase beta subunit. Important for seed oil biosynthesis. Ubiquitously expressed, with significantly increased expression in maturing seeds. The mutant plant has wrinkled seeds, with a 50-70% reduction in seed fatty acid content.; plastidic pyruvate kinase beta subunit 1 (PKP-BETA1); FUNCTIONS IN: pyruvate kinase activity; INVOLVED IN: r…
Bin: 4.2.8	glycolysis.plastid branch.glyceraldehyde 3-phosphate dehydrogenase (GAP-DH)
	Id: seq_889
	(at1g16300 : 189.0) Encodes one of the chloroplast/plastid localized GAPDH isoforms (GAPCp1/At1g79530 and GAPCp2/At1g16300). gapcp double mutants display a drastic phenotype of arrested root development, dwarfism and sterility. GAPCps are important for the synthesis of serine in roots.; glyceraldehyde-3-phosphate dehydrogenase of plastid 2 (GAPCP-2); CONTAINS InterPro DOMAIN/s: Glyceraldehyde 3-p…
Bin: 4.2.8	glycolysis.plastid branch.glyceraldehyde 3-phosphate dehydrogenase (GAP-DH)
	Id: seq_1088
	(at1g16300 : 171.0) Encodes one of the chloroplast/plastid localized GAPDH isoforms (GAPCp1/At1g79530 and GAPCp2/At1g16300). gapcp double mutants display a drastic phenotype of arrested root development, dwarfism and sterility. GAPCps are important for the synthesis of serine in roots.; glyceraldehyde-3-phosphate dehydrogenase of plastid 2 (GAPCP-2); CONTAINS InterPro DOMAIN/s: Glyceraldehyde 3-p…
Bin: 4.2.3	glycolysis.plastid branch.glucose-6-phosphate isomerase
	Id: seq_465
	(at4g24620 : 1014.0) The PGI1 gene encodes the plastid phospho-glucose (Glc) isomerase. While pgi1-1 mutant has a deficiency in leaf starch synthesis, it accumulates starch in root cap cells. Flowering time of the pgi1-1 mutant is significantly delayed under short-day conditions.; phosphoglucose isomerase 1 (PGI1); FUNCTIONS IN: glucose-6-phosphate isomerase activity; INVOLVED IN: positive regula…
Bin: 4.2.2	glycolysis.plastid branch.phosphoglucomutase (PGM)
	Id: seq_475
	(q9sm59|pgmp_pea : 456.0) Phosphoglucomutase, chloroplast precursor (EC 5.4.2.2) (Glucose phosphomutase) (PGM) - Pisum sativum (Garden pea) & (at5g51820 : 450.0) Encodes a plastid isoform of the enzyme phosphoglucomutase involved in controlling photosynthetic carbon flow. Effective petiole movement against the direction of the gravity requires functional PGM activity that is required for full dev…
Bin: 4.2.2	glycolysis.plastid branch.phosphoglucomutase (PGM)
	Id: seq_1349
	(at5g17530 : 821.0) phosphoglucosamine mutase family protein; FUNCTIONS IN: intramolecular transferase activity, phosphotransferases; INVOLVED IN: carbohydrate metabolic process; EXPRESSED IN: 23 plant structures; EXPRESSED DURING: 13 growth stages; CONTAINS InterPro DOMAIN/s: Alpha-D-phosphohexomutase, alpha/beta/alpha domain III (InterPro:IPR005846), Alpha-D-phosphohexomutase, alpha/beta/alpha …
Bin: 4.2.2	glycolysis.plastid branch.phosphoglucomutase (PGM)
	Id: seq_1676
	(at5g51820 : 153.0) Encodes a plastid isoform of the enzyme phosphoglucomutase involved in controlling photosynthetic carbon flow. Effective petiole movement against the direction of the gravity requires functional PGM activity that is required for full development of amyloplasts.; phosphoglucomutase (PGM); FUNCTIONS IN: phosphoglucomutase activity; INVOLVED IN: response to cold, starch biosynthe…
Bin: 4.2.2	glycolysis.plastid branch.phosphoglucomutase (PGM)
	Id: seq_2225
	(q9sm59|pgmp_pea : 93.2) Phosphoglucomutase, chloroplast precursor (EC 5.4.2.2) (Glucose phosphomutase) (PGM) - Pisum sativum (Garden pea) & (at5g51820 : 89.7) Encodes a plastid isoform of the enzyme phosphoglucomutase involved in controlling photosynthetic carbon flow. Effective petiole movement against the direction of the gravity requires functional PGM activity that is required for full devel…
Bin: 4.1.15	glycolysis.cytosolic branch.phospho-enol-pyruvate carboxylase (PEPC)
	Id: seq_153
	(q02909|capp1_soybn : 1769.0) Phosphoenolpyruvate carboxylase, housekeeping isozyme (EC 4.1.1.31) (PEPCase) (PEPC 1) - Glycine max (Soybean) & (gnl|cdd|64189 : 1748.0) no description available & (at3g14940 : 1704.0) Encodes a cytosolic phosphoenolpyruvate carboxylase (PEPC) that has activity when expressed in E.coli. Its mRNA is most abundantly expressed in roots and siliques. PPC3 belongs to the…
Bin: 4.1.15	glycolysis.cytosolic branch.phospho-enol-pyruvate carboxylase (PEPC)
	Id: seq_267
	(at1g68750 : 878.0) Encodes one of four Arabidopsis phosphoenolpyruvate (PEP) carboxylase proteins. But, it is more similar to bacterial PEP carboxylase than plant PEP carboxylase. Efforts to express this enzyme and to demonstrate its enzymatic activity in E.coli failed.; phosphoenolpyruvate carboxylase 4 (PPC4); CONTAINS InterPro DOMAIN/s: Pyruvate/Phosphoenolpyruvate kinase, catalytic core (Int…
Bin: 4.1.15	glycolysis.cytosolic branch.phospho-enol-pyruvate carboxylase (PEPC)
	Id: seq_364
	(gnl|cdd|64189 : 1747.0) no description available & (q02909|capp1_soybn : 1727.0) Phosphoenolpyruvate carboxylase, housekeeping isozyme (EC 4.1.1.31) (PEPCase) (PEPC 1) - Glycine max (Soybean) & (at3g14940 : 1716.0) Encodes a cytosolic phosphoenolpyruvate carboxylase (PEPC) that has activity when expressed in E.coli. Its mRNA is most abundantly expressed in roots and siliques. PPC3 belongs to the…
Bin: 4.1.14	glycolysis.cytosolic branch.pyruvate kinase (PK)
	Id: seq_86
	(at3g52990 : 229.0) Pyruvate kinase family protein; FUNCTIONS IN: pyruvate kinase activity, magnesium ion binding, potassium ion binding, catalytic activity; INVOLVED IN: glycolysis; LOCATED IN: membrane; EXPRESSED IN: guard cell, cultured cell, leaf; CONTAINS InterPro DOMAIN/s: Pyruvate/Phosphoenolpyruvate kinase, catalytic core (InterPro:IPR015813), Pyruvate kinase, alpha/beta (InterPro:IPR0157…
Bin: 4.1.14	glycolysis.cytosolic branch.pyruvate kinase (PK)
	Id: seq_130
	(q42806|kpyc_soybn : 923.0) Pyruvate kinase, cytosolic isozyme (EC 2.7.1.40) (PK) - Glycine max (Soybean) & (at5g08570 : 899.0) Pyruvate kinase family protein; FUNCTIONS IN: pyruvate kinase activity, potassium ion binding, magnesium ion binding, catalytic activity; INVOLVED IN: glycolysis; LOCATED IN: cellular_component unknown; EXPRESSED IN: 22 plant structures; EXPRESSED DURING: 13 growth stage…
Bin: 4.1.14	glycolysis.cytosolic branch.pyruvate kinase (PK)
	Id: seq_542
	(at5g56350 : 882.0) Pyruvate kinase family protein; FUNCTIONS IN: pyruvate kinase activity, potassium ion binding, magnesium ion binding, catalytic activity; INVOLVED IN: glycolysis; LOCATED IN: cellular_component unknown; EXPRESSED IN: 22 plant structures; EXPRESSED DURING: 13 growth stages; CONTAINS InterPro DOMAIN/s: Pyruvate kinase, C-terminal-like (InterPro:IPR015795), Pyruvate kinase, activ…
Bin: 4.1.13	glycolysis.cytosolic branch.enolase
	Id: seq_112
	(q9lej0|eno1_hevbr : 332.0) Enolase 1 (EC 4.2.1.11) (2-phosphoglycerate dehydratase 1) (2-phospho-D-glycerate hydro-lyase 1) (Allergen Hev b 9) - Hevea brasiliensis (Para rubber tree) & (at2g36530 : 321.0) Involved in light-dependent cold tolerance and encodes an enolase. Protein is tyrosine-phosphorylated and its phosphorylation state is modulated in response to ABA in Arabidopsis thaliana seeds…
Bin: 4.1.13	glycolysis.cytosolic branch.enolase
	Id: seq_686
	(q42971|eno_orysa : 782.0) Enolase (EC 4.2.1.11) (2-phosphoglycerate dehydratase) (2-phospho-D-glycerate hydro-lyase) (OSE1) - Oryza sativa (Rice) & (at2g36530 : 761.0) Involved in light-dependent cold tolerance and encodes an enolase. Protein is tyrosine-phosphorylated and its phosphorylation state is modulated in response to ABA in Arabidopsis thaliana seeds.; LOW EXPRESSION OF OSMOTICALLY RESP…
Bin: 4.1.13	glycolysis.cytosolic branch.enolase
	Id: seq_1305
	(at1g74030 : 443.0) Encodes the plastid-localized phosphoenolpyruvate enolase. Mutant plants have abnormal trichomes.; enolase 1 (ENO1); FUNCTIONS IN: phosphopyruvate hydratase activity; INVOLVED IN: trichome morphogenesis; LOCATED IN: chloroplast; EXPRESSED IN: 26 plant structures; EXPRESSED DURING: 13 growth stages; CONTAINS InterPro DOMAIN/s: Enolase (InterPro:IPR000941), Enolase, C-terminal (…
Bin: 4.1.13	glycolysis.cytosolic branch.enolase
	Id: seq_1362
	(q9lei9|eno2_hevbr : 733.0) Enolase 2 (EC 4.2.1.11) (2-phosphoglycerate dehydratase 2) (2-phospho-D-glycerate hydro-lyase 2) (Allergen Hev b 9) - Hevea brasiliensis (Para rubber tree) & (at2g36530 : 707.0) Involved in light-dependent cold tolerance and encodes an enolase. Protein is tyrosine-phosphorylated and its phosphorylation state is modulated in response to ABA in Arabidopsis thaliana seeds…
Bin: 4.1.13	glycolysis.cytosolic branch.enolase
	Id: seq_1946
	(q9lej0|eno1_hevbr : 191.0) Enolase 1 (EC 4.2.1.11) (2-phosphoglycerate dehydratase 1) (2-phospho-D-glycerate hydro-lyase 1) (Allergen Hev b 9) - Hevea brasiliensis (Para rubber tree) & (at2g36530 : 179.0) Involved in light-dependent cold tolerance and encodes an enolase. Protein is tyrosine-phosphorylated and its phosphorylation state is modulated in response to ABA in Arabidopsis thaliana seeds…
Bin: 4.1.13	glycolysis.cytosolic branch.enolase
	Id: seq_2018
	(p26301|eno1_maize : 102.0) Enolase 1 (EC 4.2.1.11) (2-phosphoglycerate dehydratase 1) (2-phospho-D-glycerate hydro-lyase 1) - Zea mays (Maize) & (at2g36530 : 94.4) Involved in light-dependent cold tolerance and encodes an enolase. Protein is tyrosine-phosphorylated and its phosphorylation state is modulated in response to ABA in Arabidopsis thaliana seeds.; LOW EXPRESSION OF OSMOTICALLY RESPONSI…
Bin: 4.1.13	glycolysis.cytosolic branch.enolase
	Id: seq_2028
	(at1g74030 : 236.0) Encodes the plastid-localized phosphoenolpyruvate enolase. Mutant plants have abnormal trichomes.; enolase 1 (ENO1); FUNCTIONS IN: phosphopyruvate hydratase activity; INVOLVED IN: trichome morphogenesis; LOCATED IN: chloroplast; EXPRESSED IN: 26 plant structures; EXPRESSED DURING: 13 growth stages; CONTAINS InterPro DOMAIN/s: Enolase (InterPro:IPR000941), Enolase, C-terminal (…
Bin: 4.1.12	glycolysis.cytosolic branch.phosphoglycerate mutase
	Id: seq_140
	(q42908|pmgi_mescr : 864.0) 2,3-bisphosphoglycerate-independent phosphoglycerate mutase (EC 5.4.2.1) (Phosphoglyceromutase) (BPG-independent PGAM) (PGAM-I) - Mesembryanthemum crystallinum (Common ice plant) & (at1g09780 : 833.0) Phosphoglycerate mutase, 2,3-bisphosphoglycerate-independent; FUNCTIONS IN: manganese ion binding, phosphoglycerate mutase activity, 2,3-bisphosphoglycerate-independent p…
Bin: 4.1.12	glycolysis.cytosolic branch.phosphoglycerate mutase
	Id: seq_820
	(q42908|pmgi_mescr : 359.0) 2,3-bisphosphoglycerate-independent phosphoglycerate mutase (EC 5.4.2.1) (Phosphoglyceromutase) (BPG-independent PGAM) (PGAM-I) - Mesembryanthemum crystallinum (Common ice plant) & (at3g08590 : 338.0) Phosphoglycerate mutase, 2,3-bisphosphoglycerate-independent; FUNCTIONS IN: manganese ion binding, phosphoglycerate mutase activity, 2,3-bisphosphoglycerate-independent p…
Bin: 4.1.12	glycolysis.cytosolic branch.phosphoglycerate mutase
	Id: seq_1823
	(at5g64460 : 413.0) Phosphoglycerate mutase family protein; FUNCTIONS IN: molecular_function unknown; INVOLVED IN: biological_process unknown; LOCATED IN: cellular_component unknown; EXPRESSED IN: 22 plant structures; EXPRESSED DURING: 13 growth stages; CONTAINS InterPro DOMAIN/s: Histidine phosphatase superfamily, clade-1 (InterPro:IPR013078); BEST Arabidopsis thaliana protein match is: Phosphog…
Bin: 4.1.11	glycolysis.cytosolic branch.3-phosphoglycerate kinase (PGK)
	Id: seq_427
	(q42962|pgky_tobac : 655.0) Phosphoglycerate kinase, cytosolic (EC 2.7.2.3) - Nicotiana tabacum (Common tobacco) & (at1g79550 : 644.0) Encodes cytosolic phosphoglycerate kinase (PGK).; phosphoglycerate kinase (PGK); FUNCTIONS IN: phosphoglycerate kinase activity; INVOLVED IN: glycolysis; LOCATED IN: cytosol, apoplast, plasma membrane, nucleus, membrane; EXPRESSED IN: 26 plant structures; EXPRESSE…
Bin: 4.1.11	glycolysis.cytosolic branch.3-phosphoglycerate kinase (PGK)
	Id: seq_1182
	(q42962|pgky_tobac : 665.0) Phosphoglycerate kinase, cytosolic (EC 2.7.2.3) - Nicotiana tabacum (Common tobacco) & (at1g79550 : 658.0) Encodes cytosolic phosphoglycerate kinase (PGK).; phosphoglycerate kinase (PGK); FUNCTIONS IN: phosphoglycerate kinase activity; INVOLVED IN: glycolysis; LOCATED IN: cytosol, apoplast, plasma membrane, nucleus, membrane; EXPRESSED IN: 26 plant structures; EXPRESSE…
Bin: 4.1.10	glycolysis.cytosolic branch.aldolase
	Id: seq_101
	(gnl|cdd|84661 : 616.0) no description available & (gnl|cdd|36770 : 597.0) no description available & (at2g36460 : 586.0) Aldolase superfamily protein; FUNCTIONS IN: copper ion binding; INVOLVED IN: response to salt stress, pentose-phosphate shunt; LOCATED IN: mitochondrion, plasma membrane, membrane; EXPRESSED IN: 24 plant structures; EXPRESSED DURING: 14 growth stages; CONTAINS InterPro DOMAIN/…
Bin: 4.1.10	glycolysis.cytosolic branch.aldolase
	Id: seq_1089
	(p46256|alf1_pea : 353.0) Fructose-bisphosphate aldolase, cytoplasmic isozyme 1 (EC 4.1.2.13) - Pisum sativum (Garden pea) & (at4g26530 : 338.0) Aldolase superfamily protein; FUNCTIONS IN: fructose-bisphosphate aldolase activity; INVOLVED IN: glycolysis, metabolic process; EXPRESSED IN: 17 plant structures; EXPRESSED DURING: 11 growth stages; CONTAINS InterPro DOMAIN/s: Aldolase-type TIM barrel (…
Bin: 4.1.10	glycolysis.cytosolic branch.aldolase
	Id: seq_1775
	(gnl|cdd|84661 : 137.0) no description available & (p46256|alf1_pea : 134.0) Fructose-bisphosphate aldolase, cytoplasmic isozyme 1 (EC 4.1.2.13) - Pisum sativum (Garden pea) & (gnl|cdd|36770 : 133.0) no description available & (at4g26530 : 126.0) Aldolase superfamily protein; FUNCTIONS IN: fructose-bisphosphate aldolase activity; INVOLVED IN: glycolysis, metabolic process; EXPRESSED IN: 17 plant …
Bin: 4.1.10	glycolysis.cytosolic branch.aldolase
	Id: seq_1825
	(gnl|cdd|84661 : 129.0) no description available & (at4g26530 : 119.0) Aldolase superfamily protein; FUNCTIONS IN: fructose-bisphosphate aldolase activity; INVOLVED IN: glycolysis, metabolic process; EXPRESSED IN: 17 plant structures; EXPRESSED DURING: 11 growth stages; CONTAINS InterPro DOMAIN/s: Aldolase-type TIM barrel (InterPro:IPR013785), Fructose-bisphosphate aldolase, class-I (InterPro:IPR…
Bin: 4.1.9	glycolysis.cytosolic branch.non-phosphorylating glyceraldehyde 3-phosphate dehydrogenase (NPGAP-DH)
	Id: seq_400
	(p93338|gapn_nicpl : 945.0) NADP-dependent glyceraldehyde-3-phosphate dehydrogenase (EC 1.2.1.9) (Non-phosphorylating glyceraldehyde 3-phosphate dehydrogenase) (Glyceraldehyde-3-phosphate dehydrogenase [NADP+]) (Triosephosphate dehydrogenase) - Nicotiana plumbagin & (at2g24270 : 932.0) Encodes a protein with non-phosphorylating NADP-dependent glyceraldehyde-3-phosphate dehydrogenase activity. The…
Bin: 4.1.8	glycolysis.cytosolic branch.glyceraldehyde 3-phosphate dehydrogenase (GAP-DH)
	Id: seq_34
	(p34921|g3pc_diaca : 588.0) Glyceraldehyde-3-phosphate dehydrogenase, cytosolic (EC 1.2.1.12) - Dianthus caryophyllus (Carnation) (Clove pink) & (at1g13440 : 577.0) glyceraldehyde-3-phosphate dehydrogenase C2 (GAPC2); FUNCTIONS IN: copper ion binding, glyceraldehyde-3-phosphate dehydrogenase activity, zinc ion binding; INVOLVED IN: response to oxidative stress, response to cadmium ion, gluconeoge…
Bin: 4.1.8	glycolysis.cytosolic branch.glyceraldehyde 3-phosphate dehydrogenase (GAP-DH)
	Id: seq_1262
	(at1g13440 : 174.0) glyceraldehyde-3-phosphate dehydrogenase C2 (GAPC2); FUNCTIONS IN: copper ion binding, glyceraldehyde-3-phosphate dehydrogenase activity, zinc ion binding; INVOLVED IN: response to oxidative stress, response to cadmium ion, gluconeogenesis, defense response to bacterium, glycolysis; LOCATED IN: cytosol, mitochondrion, chloroplast, plasma membrane, membrane; EXPRESSED IN: 24 pl…
Bin: 4.1.8	glycolysis.cytosolic branch.glyceraldehyde 3-phosphate dehydrogenase (GAP-DH)
	Id: seq_1708
	(p09094|g3pc_tobac : 101.0) Glyceraldehyde-3-phosphate dehydrogenase, cytosolic (EC 1.2.1.12) (Fragment) - Nicotiana tabacum (Common tobacco) & (at1g13440 : 97.4) glyceraldehyde-3-phosphate dehydrogenase C2 (GAPC2); FUNCTIONS IN: copper ion binding, glyceraldehyde-3-phosphate dehydrogenase activity, zinc ion binding; INVOLVED IN: response to oxidative stress, response to cadmium ion, gluconeogene…
Bin: 4.1.8	glycolysis.cytosolic branch.glyceraldehyde 3-phosphate dehydrogenase (GAP-DH)
	Id: seq_1717
	(p17878|g3pc_mescr : 237.0) Glyceraldehyde-3-phosphate dehydrogenase, cytosolic (EC 1.2.1.12) - Mesembryanthemum crystallinum (Common ice plant) & (at1g13440 : 233.0) glyceraldehyde-3-phosphate dehydrogenase C2 (GAPC2); FUNCTIONS IN: copper ion binding, glyceraldehyde-3-phosphate dehydrogenase activity, zinc ion binding; INVOLVED IN: response to oxidative stress, response to cadmium ion, gluconeo…
Bin: 4.1.8	glycolysis.cytosolic branch.glyceraldehyde 3-phosphate dehydrogenase (GAP-DH)
	Id: seq_1855
	(p17878|g3pc_mescr : 424.0) Glyceraldehyde-3-phosphate dehydrogenase, cytosolic (EC 1.2.1.12) - Mesembryanthemum crystallinum (Common ice plant) & (at1g13440 : 421.0) glyceraldehyde-3-phosphate dehydrogenase C2 (GAPC2); FUNCTIONS IN: copper ion binding, glyceraldehyde-3-phosphate dehydrogenase activity, zinc ion binding; INVOLVED IN: response to oxidative stress, response to cadmium ion, gluconeo…
Bin: 4.1.7	glycolysis.cytosolic branch.triosephosphate isomerase (TPI)
	Id: seq_188
	(gnl|cdd|36856 : 356.0) no description available & (p48495|tpis_pethy : 344.0) Triosephosphate isomerase, cytosolic (EC 5.3.1.1) (TIM) (Triose-phosphate isomerase) - Petunia hybrida (Petunia) & (at3g55440 : 339.0) Encodes triosephosphate isomerase.; triosephosphate isomerase (TPI); FUNCTIONS IN: triose-phosphate isomerase activity, copper ion binding; INVOLVED IN: in 7 processes; LOCATED IN: in 8…
Bin: 4.1.7	glycolysis.cytosolic branch.triosephosphate isomerase (TPI)
	Id: seq_503
	(p48495|tpis_pethy : 380.0) Triosephosphate isomerase, cytosolic (EC 5.3.1.1) (TIM) (Triose-phosphate isomerase) - Petunia hybrida (Petunia) & (at3g55440 : 372.0) Encodes triosephosphate isomerase.; triosephosphate isomerase (TPI); FUNCTIONS IN: triose-phosphate isomerase activity, copper ion binding; INVOLVED IN: in 7 processes; LOCATED IN: in 8 components; EXPRESSED IN: 27 plant structures; EXP…
Bin: 4.1.7	glycolysis.cytosolic branch.triosephosphate isomerase (TPI)
	Id: seq_2005
	(gnl|cdd|36856 : 329.0) no description available & (p48495|tpis_pethy : 327.0) Triosephosphate isomerase, cytosolic (EC 5.3.1.1) (TIM) (Triose-phosphate isomerase) - Petunia hybrida (Petunia) & (at3g55440 : 320.0) Encodes triosephosphate isomerase.; triosephosphate isomerase (TPI); FUNCTIONS IN: triose-phosphate isomerase activity, copper ion binding; INVOLVED IN: in 7 processes; LOCATED IN: in 8…
Bin: 4.1.6	glycolysis.cytosolic branch.fructose-2,6-bisphosphatase (Fru2,6BisPase)
	Id: seq_72
	(at1g07110 : 1133.0) Encodes the bifunctional enzyme fructose-6-phosphate 2-kinase/fructose-2,6-bisphosphatase.; "fructose-2,6-bisphosphatase" (F2KP); FUNCTIONS IN: fructose-2,6-bisphosphate 2-phosphatase activity; INVOLVED IN: N-terminal protein myristoylation, fructose metabolic process; LOCATED IN: cytosol, plasma membrane; EXPRESSED IN: 24 plant structures; EXPRESSED DURING: 14 growth stages;…
Bin: 4.1.5	glycolysis.cytosolic branch.pyrophosphate-fructose-6-P phosphotransferase
	Id: seq_61
	(q41141|pfpb_ricco : 972.0) Pyrophosphate--fructose 6-phosphate 1-phosphotransferase subunit beta (EC 2.7.1.90) (PFP) (6-phosphofructokinase, pyrophosphate dependent) (Pyrophosphate-dependent 6-phosphofructose-1-kinase) (PPi-PFK) - Ricinus communis (Castor bean) & (at1g12000 : 951.0) Phosphofructokinase family protein; FUNCTIONS IN: diphosphate-fructose-6-phosphate 1-phosphotransferase activity; …
Bin: 4.1.5	glycolysis.cytosolic branch.pyrophosphate-fructose-6-P phosphotransferase
	Id: seq_383
	(q41140|pfpa_ricco : 1114.0) Pyrophosphate--fructose 6-phosphate 1-phosphotransferase alpha subunit (EC 2.7.1.90) (PFP) (6-phosphofructokinase, pyrophosphate dependent) (Pyrophosphate-dependent 6-phosphofructose-1-kinase) (PPi-PFK) - Ricinus communis (Castor bean) & (at1g76550 : 1056.0) Phosphofructokinase family protein; CONTAINS InterPro DOMAIN/s: Pyrophosphate-dependent phosphofructokinase Pfp…
Bin: 4.1.4	glycolysis.cytosolic branch.phosphofructokinase (PFK)
	Id: seq_429
	(at5g47810 : 707.0) phosphofructokinase 2 (PFK2); CONTAINS InterPro DOMAIN/s: Pyrophosphate-dependent phosphofructokinase TP0108 (InterPro:IPR012004), Phosphofructokinase (InterPro:IPR000023); BEST Arabidopsis thaliana protein match is: phosphofructokinase 3 (TAIR:AT4G26270.1); Has 1807 Blast hits to 1807 proteins in 277 species: Archae - 0; Bacteria - 0; Metazoa - 736; Fungi - 347; Plants - 385;…
Bin: 4.1.4	glycolysis.cytosolic branch.phosphofructokinase (PFK)
	Id: seq_779
	(at4g26270 : 809.0) phosphofructokinase 3 (PFK3); CONTAINS InterPro DOMAIN/s: Pyrophosphate-dependent phosphofructokinase TP0108 (InterPro:IPR012004), Phosphofructokinase (InterPro:IPR000023); BEST Arabidopsis thaliana protein match is: phosphofructokinase 7 (TAIR:AT5G56630.1); Has 30201 Blast hits to 17322 proteins in 780 species: Archae - 12; Bacteria - 1396; Metazoa - 17338; Fungi - 3422; Plan…
Bin: 4.1.3	glycolysis.cytosolic branch.glucose-6-phosphate isomerase
	Id: seq_303
	(at5g42740 : 971.0) Sugar isomerase (SIS) family protein; FUNCTIONS IN: glucose-6-phosphate isomerase activity; INVOLVED IN: defense response to fungus, incompatible interaction, response to cadmium ion, gluconeogenesis, glycolysis; LOCATED IN: cellular_component unknown; EXPRESSED IN: 24 plant structures; EXPRESSED DURING: 13 growth stages; CONTAINS InterPro DOMAIN/s: Phosphoglucose isomerase, c…
Bin: 4.1.3	glycolysis.cytosolic branch.glucose-6-phosphate isomerase
	Id: seq_1947
	(at5g42740 : 230.0) Sugar isomerase (SIS) family protein; FUNCTIONS IN: glucose-6-phosphate isomerase activity; INVOLVED IN: defense response to fungus, incompatible interaction, response to cadmium ion, gluconeogenesis, glycolysis; LOCATED IN: cellular_component unknown; EXPRESSED IN: 24 plant structures; EXPRESSED DURING: 13 growth stages; CONTAINS InterPro DOMAIN/s: Phosphoglucose isomerase, c…
Bin: 4.1.2	glycolysis.cytosolic branch.phosphoglucomutase (PGM)
	Id: seq_1064
	(q9sm60|pgmc_pea : 833.0) Phosphoglucomutase, cytoplasmic (EC 5.4.2.2) (Glucose phosphomutase) (PGM) - Pisum sativum (Garden pea) & (at1g70730 : 818.0) Encodes a cytosolic phosphoglucomutase (PGM). Two Arabidopsis PGM proteins (AT1G70730/PGM2 and AT1G23190/PGM3) have high sequence similarities and redundant functions. Mature plants possessing a single cPGM allele had a major reduction in cPGM act…
Bin: 4.1.2	glycolysis.cytosolic branch.phosphoglucomutase (PGM)
	Id: seq_1368
	(q9sm60|pgmc_pea : 374.0) Phosphoglucomutase, cytoplasmic (EC 5.4.2.2) (Glucose phosphomutase) (PGM) - Pisum sativum (Garden pea) & (at1g70730 : 370.0) Encodes a cytosolic phosphoglucomutase (PGM). Two Arabidopsis PGM proteins (AT1G70730/PGM2 and AT1G23190/PGM3) have high sequence similarities and redundant functions. Mature plants possessing a single cPGM allele had a major reduction in cPGM act…
Bin: 4.1.2	glycolysis.cytosolic branch.phosphoglucomutase (PGM)
	Id: seq_1522
	(at1g23190 : 323.0) Encodes a cytosolic phosphoglucomutase (PGM). Two Arabidopsis PGM proteins (AT1G70730/PGM2 and AT1G23190/PGM3) have high sequence similarities and redundant functions. Mature plants possessing a single cPGM allele had a major reduction in cPGM activity. Whereas pgm2 and pgm3 single mutants are undistinguishable from the wild type, loss of both PGM2 and PGM3 severely impairs ma…
Bin: 4.1.1	glycolysis.cytosolic branch.UGPase
	Id: seq_732
	(p19595|ugpa_soltu : 698.0) UTP--glucose-1-phosphate uridylyltransferase (EC 2.7.7.9) (UDP-glucose pyrophosphorylase) (UDPGP) (UGPase) - Solanum tuberosum (Potato) & (at5g17310 : 677.0) UDP-glucose pyrophosphorylase 2 (UGP2); FUNCTIONS IN: UTP:glucose-1-phosphate uridylyltransferase activity, nucleotidyltransferase activity; INVOLVED IN: response to cadmium ion, callose deposition in cell wall, r…
5. fermentation
Bin: 5.10	fermentation.aldehyde dehydrogenase
	Id: seq_56
	(at1g44170 : 664.0) Encodes a protein similar to the aldehyde dehydrogenase cp-ADH from C.plantagineum. Constitutively expressed at low levels.; aldehyde dehydrogenase 3H1 (ALDH3H1); FUNCTIONS IN: 3-chloroallyl aldehyde dehydrogenase activity, aldehyde dehydrogenase (NAD) activity; INVOLVED IN: response to desiccation, response to salt stress, response to abscisic acid stimulus; LOCATED IN: endop…
Bin: 5.10	fermentation.aldehyde dehydrogenase
	Id: seq_261
	(at3g24503 : 729.0) Arabidopsis thaliana aldehyde dehydrogenase AtALDH1a mRNA. a sinapaldehyde dehydrogenase catalyzes both the oxidation of coniferylaldehyde and sinapaldehyde forming ferulic acid and sinapic acid, respectively; aldehyde dehydrogenase 2C4 (ALDH2C4); FUNCTIONS IN: 3-chloroallyl aldehyde dehydrogenase activity, coniferyl-aldehyde dehydrogenase activity, aldehyde dehydrogenase (NAD…
Bin: 5.10	fermentation.aldehyde dehydrogenase
	Id: seq_671
	(q9zpb7|al7a1_maldo : 769.0) Aldehyde dehydrogenase family 7 member A1 (EC 1.2.1.3) (Antiquitin-1) (Matured fruit 60 kDa protein) (MF-60) - Malus domestica (Apple) (Malus sylvestris) & (at1g54100 : 724.0) Aldehyde dehydrogenase; aldehyde dehydrogenase 7B4 (ALDH7B4); FUNCTIONS IN: 3-chloroallyl aldehyde dehydrogenase activity, oxidoreductase activity; INVOLVED IN: response to desiccation, response…
Bin: 5.10	fermentation.aldehyde dehydrogenase
	Id: seq_780
	(at1g23800 : 895.0) Encodes a mitochondrial aldehyde dehydrogenase; nuclear gene for mitochondrial product.; aldehyde dehydrogenase 2B7 (ALDH2B7); FUNCTIONS IN: 3-chloroallyl aldehyde dehydrogenase activity, aldehyde dehydrogenase (NAD) activity; INVOLVED IN: oxidation reduction, metabolic process; LOCATED IN: mitochondrion; EXPRESSED IN: 13 plant structures; EXPRESSED DURING: LP.06 six leaves vi…
Bin: 5.10	fermentation.aldehyde dehydrogenase
	Id: seq_826
	(at3g48000 : 897.0) Encodes a putative (NAD+) aldehyde dehydrogenase.; aldehyde dehydrogenase 2B4 (ALDH2B4); FUNCTIONS IN: 3-chloroallyl aldehyde dehydrogenase activity, aldehyde dehydrogenase (NAD) activity, ATP binding; INVOLVED IN: response to cadmium ion; LOCATED IN: mitochondrion, chloroplast; EXPRESSED IN: 24 plant structures; EXPRESSED DURING: 14 growth stages; CONTAINS InterPro DOMAIN/s: …
Bin: 5.10	fermentation.aldehyde dehydrogenase
	Id: seq_1141
	(at3g48000 : 836.0) Encodes a putative (NAD+) aldehyde dehydrogenase.; aldehyde dehydrogenase 2B4 (ALDH2B4); FUNCTIONS IN: 3-chloroallyl aldehyde dehydrogenase activity, aldehyde dehydrogenase (NAD) activity, ATP binding; INVOLVED IN: response to cadmium ion; LOCATED IN: mitochondrion, chloroplast; EXPRESSED IN: 24 plant structures; EXPRESSED DURING: 14 growth stages; CONTAINS InterPro DOMAIN/s: …
Bin: 5.10	fermentation.aldehyde dehydrogenase
	Id: seq_1438
	(q9zpb7|al7a1_maldo : 137.0) Aldehyde dehydrogenase family 7 member A1 (EC 1.2.1.3) (Antiquitin-1) (Matured fruit 60 kDa protein) (MF-60) - Malus domestica (Apple) (Malus sylvestris) & (at1g54100 : 123.0) Aldehyde dehydrogenase; aldehyde dehydrogenase 7B4 (ALDH7B4); FUNCTIONS IN: 3-chloroallyl aldehyde dehydrogenase activity, oxidoreductase activity; INVOLVED IN: response to desiccation, response…
Bin: 5.3	fermentation.ADH
	Id: seq_581
	(p48977|adh_maldo : 670.0) Alcohol dehydrogenase (EC 1.1.1.1) - Malus domestica (Apple) (Malus sylvestris) & (at1g77120 : 665.0) Catalyzes the reduction of acetaldehyde using NADH as reductant. Requires zinc for activity. Dimer. Anaerobic response polypeptide (ANP). Fermentation. The protein undergoes thiolation following treatment with the oxidant tert-butylhydroperoxide.; alcohol dehydrogenase …
Bin: 5.3	fermentation.ADH
	Id: seq_1898
	(p25141|adh1_pethy : 649.0) Alcohol dehydrogenase 1 (EC 1.1.1.1) - Petunia hybrida (Petunia) & (at1g77120 : 634.0) Catalyzes the reduction of acetaldehyde using NADH as reductant. Requires zinc for activity. Dimer. Anaerobic response polypeptide (ANP). Fermentation. The protein undergoes thiolation following treatment with the oxidant tert-butylhydroperoxide.; alcohol dehydrogenase 1 (ADH1); FUNC…
Bin: 5.2	fermentation.PDC
	Id: seq_154
	(at4g33070 : 1077.0) Thiamine pyrophosphate dependent pyruvate decarboxylase family protein; FUNCTIONS IN: in 6 functions; LOCATED IN: membrane; EXPRESSED IN: 11 plant structures; EXPRESSED DURING: 4 anthesis, C globular stage, F mature embryo stage, petal differentiation and expansion stage, E expanded cotyledon stage; CONTAINS InterPro DOMAIN/s: TPP-binding enzyme, conserved site (InterPro:IPR0…
Bin: 5.2	fermentation.PDC
	Id: seq_308
	(at5g17380 : 854.0) Thiamine pyrophosphate dependent pyruvate decarboxylase family protein; FUNCTIONS IN: pyruvate decarboxylase activity, magnesium ion binding, thiamin pyrophosphate binding, transferase activity, catalytic activity; LOCATED IN: cellular_component unknown; EXPRESSED IN: 23 plant structures; EXPRESSED DURING: 13 growth stages; CONTAINS InterPro DOMAIN/s: TPP-binding enzyme, conse…
Bin: 5.2	fermentation.PDC
	Id: seq_631
	(p51850|pdc1_pea : 1065.0) Pyruvate decarboxylase isozyme 1 (EC 4.1.1.1) (PDC) - Pisum sativum (Garden pea) & (at5g54960 : 991.0) pyruvate decarboxylase-2; pyruvate decarboxylase-2 (PDC2); FUNCTIONS IN: pyruvate decarboxylase activity, magnesium ion binding, carboxy-lyase activity, thiamin pyrophosphate binding, catalytic activity; INVOLVED IN: response to hypoxia; LOCATED IN: cellular_component …
Bin: 5.1	fermentation.LDH
	Id: seq_1329
	(at4g17260 : 538.0) Lactate/malate dehydrogenase family protein; FUNCTIONS IN: in 6 functions; INVOLVED IN: response to salt stress, response to abscisic acid stimulus; LOCATED IN: plasma membrane; EXPRESSED IN: 24 plant structures; EXPRESSED DURING: 13 growth stages; CONTAINS InterPro DOMAIN/s: L-lactate dehydrogenase (InterPro:IPR011304), Lactate/malate dehydrogenase, C-terminal (InterPro:IPR02…
6. gluconeogenesis / glyoxylate cycle
Bin: 6.9	gluconeogenesis / glyoxylate cycle.isocitrate lyase
	Id: seq_2247
	(p93110|acea_cucma : 157.0) Isocitrate lyase (EC 4.1.3.1) (Isocitrase) (Isocitratase) (ICL) - Cucurbita maxima (Pumpkin) (Winter squash) & (at3g21720 : 147.0) Encodes a glyoxylate cycle enzyme isocitrate lyase (ICL).; isocitrate lyase (ICL); FUNCTIONS IN: isocitrate lyase activity, catalytic activity; INVOLVED IN: carboxylic acid metabolic process, metabolic process; LOCATED IN: cellular_componen…
Bin: 6.9	gluconeogenesis / glyoxylate cycle.isocitrate lyase
	Id: seq_2251
	(p45457|acea2_soybn : 123.0) Isocitrate lyase 2 (EC 4.1.3.1) (Isocitrase 2) (Isocitratase 2) (ICL 2) (Fragment) - Glycine max (Soybean) & (at3g21720 : 115.0) Encodes a glyoxylate cycle enzyme isocitrate lyase (ICL).; isocitrate lyase (ICL); FUNCTIONS IN: isocitrate lyase activity, catalytic activity; INVOLVED IN: carboxylic acid metabolic process, metabolic process; LOCATED IN: cellular_component…
Bin: 6.5	gluconeogenesis / glyoxylate cycle.pyruvate dikinase
	Id: seq_1726
	(q42910|ppdk_mescr : 706.0) Pyruvate, phosphate dikinase, chloroplast precursor (EC 2.7.9.1) (Pyruvate, orthophosphate dikinase) - Mesembryanthemum crystallinum (Common ice plant) & (at4g15530 : 667.0) Encodes a dual-targeted protein believed to act as a pyruvate, orthophosphate dikinase. These enzymes are normally associated with C4 photosynthesis which does not occur in Arabidopsis. However, PP…
Bin: 6.5	gluconeogenesis / glyoxylate cycle.pyruvate dikinase
	Id: seq_1834
	(q42910|ppdk_mescr : 1116.0) Pyruvate, phosphate dikinase, chloroplast precursor (EC 2.7.9.1) (Pyruvate, orthophosphate dikinase) - Mesembryanthemum crystallinum (Common ice plant) & (at4g15530 : 1093.0) Encodes a dual-targeted protein believed to act as a pyruvate, orthophosphate dikinase. These enzymes are normally associated with C4 photosynthesis which does not occur in Arabidopsis. However, …
Bin: 6.4	gluconeogenesis / glyoxylate cycle.PEPCK
	Id: seq_334
	(at4g37870 : 1093.0) Encodes a putative phosphoenolpyruvate carboxykinase (ATP-dependent).; phosphoenolpyruvate carboxykinase 1 (PCK1); FUNCTIONS IN: phosphoenolpyruvate carboxykinase activity, purine nucleotide binding, phosphoenolpyruvate carboxykinase (ATP) activity, ATP binding; INVOLVED IN: defense response to fungus, incompatible interaction, response to cadmium ion, cellular response to ph…
Bin: 6.4	gluconeogenesis / glyoxylate cycle.PEPCK
	Id: seq_558
	(at4g37870 : 244.0) Encodes a putative phosphoenolpyruvate carboxykinase (ATP-dependent).; phosphoenolpyruvate carboxykinase 1 (PCK1); FUNCTIONS IN: phosphoenolpyruvate carboxykinase activity, purine nucleotide binding, phosphoenolpyruvate carboxykinase (ATP) activity, ATP binding; INVOLVED IN: defense response to fungus, incompatible interaction, response to cadmium ion, cellular response to pho…
Bin: 6.4	gluconeogenesis / glyoxylate cycle.PEPCK
	Id: seq_1298
	(q9slz0|pepck_maize : 171.0) Phosphoenolpyruvate carboxykinase [ATP] (EC 4.1.1.49) (PEP carboxykinase) (Phosphoenolpyruvate carboxylase) (PEPCK) - Zea mays (Maize) & (at4g37870 : 163.0) Encodes a putative phosphoenolpyruvate carboxykinase (ATP-dependent).; phosphoenolpyruvate carboxykinase 1 (PCK1); FUNCTIONS IN: phosphoenolpyruvate carboxykinase activity, purine nucleotide binding, phosphoenolpy…
Bin: 6.4	gluconeogenesis / glyoxylate cycle.PEPCK
	Id: seq_1765
	(at4g37870 : 345.0) Encodes a putative phosphoenolpyruvate carboxykinase (ATP-dependent).; phosphoenolpyruvate carboxykinase 1 (PCK1); FUNCTIONS IN: phosphoenolpyruvate carboxykinase activity, purine nucleotide binding, phosphoenolpyruvate carboxykinase (ATP) activity, ATP binding; INVOLVED IN: defense response to fungus, incompatible interaction, response to cadmium ion, cellular response to pho…
Bin: 6.3	gluconeogenesis / glyoxylate cycle.Malate DH
	Id: seq_604
	(p46488|mdhg_cucsa : 615.0) Malate dehydrogenase, glyoxysomal precursor (EC 1.1.1.37) - Cucumis sativus (Cucumber) & (at2g22780 : 575.0) encodes an peroxisomal NAD-malate dehydrogenase that is involved in fatty acid beta-oxidation through providing NAD to the process of converting fatty acyl CoA to acetyl CoA.; peroxisomal NAD-malate dehydrogenase 1 (PMDH1); FUNCTIONS IN: in 6 functions; INVOLVED…
Bin: 6.3	gluconeogenesis / glyoxylate cycle.Malate DH
	Id: seq_1011
	(p46488|mdhg_cucsa : 556.0) Malate dehydrogenase, glyoxysomal precursor (EC 1.1.1.37) - Cucumis sativus (Cucumber) & (at2g22780 : 542.0) encodes an peroxisomal NAD-malate dehydrogenase that is involved in fatty acid beta-oxidation through providing NAD to the process of converting fatty acyl CoA to acetyl CoA.; peroxisomal NAD-malate dehydrogenase 1 (PMDH1); FUNCTIONS IN: in 6 functions; INVOLVED…
Bin: 6.3	gluconeogenesis / glyoxylate cycle.Malate DH
	Id: seq_1862
	(p46488|mdhg_cucsa : 207.0) Malate dehydrogenase, glyoxysomal precursor (EC 1.1.1.37) - Cucumis sativus (Cucumber) & (at2g22780 : 201.0) encodes an peroxisomal NAD-malate dehydrogenase that is involved in fatty acid beta-oxidation through providing NAD to the process of converting fatty acyl CoA to acetyl CoA.; peroxisomal NAD-malate dehydrogenase 1 (PMDH1); FUNCTIONS IN: in 6 functions; INVOLVED…
Bin: 6.2	gluconeogenesis / glyoxylate cycle.malate synthase
	Id: seq_590
	(p17432|masy_goshi : 1022.0) Malate synthase, glyoxysomal (EC 2.3.3.9) - Gossypium hirsutum (Upland cotton) & (at5g03860 : 972.0) Encodes a protein with malate synthase activity.; malate synthase (MLS); FUNCTIONS IN: malate synthase activity; INVOLVED IN: glyoxylate cycle; CONTAINS InterPro DOMAIN/s: Malate synthase-like (InterPro:IPR011076), Malate synthase, conserved site (InterPro:IPR019830), …
Bin: 6.2	gluconeogenesis / glyoxylate cycle.malate synthase
	Id: seq_991
	(p17815|masy_ricco : 373.0) Malate synthase, glyoxysomal (EC 2.3.3.9) - Ricinus communis (Castor bean) & (at5g03860 : 342.0) Encodes a protein with malate synthase activity.; malate synthase (MLS); FUNCTIONS IN: malate synthase activity; INVOLVED IN: glyoxylate cycle; CONTAINS InterPro DOMAIN/s: Malate synthase-like (InterPro:IPR011076), Malate synthase, conserved site (InterPro:IPR019830), Malat…
Bin: 6.1	gluconeogenesis / glyoxylate cycle.citrate synthase
	Id: seq_724
	(p49299|cysz_cucma : 881.0) Citrate synthase, glyoxysomal precursor (EC 2.3.3.1) (GCS) - Cucurbita maxima (Pumpkin) (Winter squash) & (at3g58750 : 868.0) Encodes a peroxisomal citrate synthase that is expressed throughout seedling and shoot development.; citrate synthase 2 (CSY2); FUNCTIONS IN: citrate (SI)-synthase activity; INVOLVED IN: fatty acid beta-oxidation, tricarboxylic acid cycle; LOCAT…
Bin: 6	gluconeogenesis / glyoxylate cycle
	Id: seq_530
	(at3g16910 : 909.0) Encodes a peroxisomal protein with acetyl-CoA synthetase activity that is responsible for the activation of acetate for entry into the glyoxylate cycle.; acyl-activating enzyme 7 (AAE7); FUNCTIONS IN: acetate-CoA ligase activity, AMP binding; INVOLVED IN: glyoxylate cycle, acetate metabolic process; LOCATED IN: peroxisome; EXPRESSED IN: 23 plant structures; EXPRESSED DURING: 1…
7. OPP
Bin: 7.3	OPP.electron transfer
	Id: seq_629
	(q41014|fenr2_pea : 677.0) Ferredoxin--NADP reductase, root isozyme, chloroplast precursor (EC 1.18.1.2) (FNR) - Pisum sativum (Garden pea) & (at4g05390 : 624.0) Encodes a root-type ferredoxin:NADP(H) oxidoreductase.; root FNR 1 (RFNR1); FUNCTIONS IN: oxidoreductase activity, copper ion binding; INVOLVED IN: oxidation reduction; LOCATED IN: chloroplast, thylakoid membrane; EXPRESSED IN: 22 plant …
Bin: 7.3	OPP.electron transfer
	Id: seq_1167
	(p27788|fer3_maize : 194.0) Ferredoxin-3, chloroplast precursor (Ferredoxin III) (Fd III) - Zea mays (Maize) & (at2g27510 : 176.0) ferredoxin 3 (FD3); FUNCTIONS IN: electron carrier activity, iron-sulfur cluster binding, 2 iron, 2 sulfur cluster binding; INVOLVED IN: electron transport chain; LOCATED IN: chloroplast; EXPRESSED IN: 22 plant structures; EXPRESSED DURING: 13 growth stages; CONTAINS …
Bin: 7.2.4	OPP.non-reductive PP.ribose 5-phosphate isomerase
	Id: seq_902
	(at3g04790 : 374.0) Ribose 5-phosphate isomerase, type A protein; FUNCTIONS IN: ribose-5-phosphate isomerase activity; INVOLVED IN: defense response to bacterium, reductive pentose-phosphate cycle; LOCATED IN: thylakoid, chloroplast thylakoid membrane, chloroplast stroma, chloroplast, chloroplast envelope; EXPRESSED IN: 26 plant structures; EXPRESSED DURING: 14 growth stages; CONTAINS InterPro DO…
Bin: 7.2.2	OPP.non-reductive PP.transaldolase
	Id: seq_209
	(at1g12230 : 577.0) Aldolase superfamily protein; FUNCTIONS IN: transaldolase activity, zinc ion binding; INVOLVED IN: carbohydrate metabolic process, metabolic process; EXPRESSED IN: 23 plant structures; EXPRESSED DURING: 13 growth stages; CONTAINS InterPro DOMAIN/s: Aldolase-type TIM barrel (InterPro:IPR013785), Transaldolase (InterPro:IPR001585). & (gnl|cdd|29950 : 368.0) no description availa…
Bin: 7.2.2	OPP.non-reductive PP.transaldolase
	Id: seq_740
	(at5g13420 : 637.0) Aldolase-type TIM barrel family protein; FUNCTIONS IN: catalytic activity, transaldolase activity; INVOLVED IN: response to cadmium ion; LOCATED IN: mitochondrion, chloroplast stroma, chloroplast; EXPRESSED IN: 25 plant structures; EXPRESSED DURING: 15 growth stages; CONTAINS InterPro DOMAIN/s: Transaldolase subfamily (InterPro:IPR004732), Aldolase-type TIM barrel (InterPro:IP…
Bin: 7.2.1	OPP.non-reductive PP.transketolase
	Id: seq_41
	(q7sic9|tktc_maize : 494.0) Transketolase, chloroplast (EC 2.2.1.1) (TK) - Zea mays (Maize) & (at2g45290 : 474.0) Transketolase; FUNCTIONS IN: catalytic activity, transketolase activity; INVOLVED IN: response to cadmium ion; LOCATED IN: chloroplast stroma, chloroplast; EXPRESSED IN: 25 plant structures; EXPRESSED DURING: 16 growth stages; CONTAINS InterPro DOMAIN/s: Transketolase, bacterial-like …
Bin: 7.2.1	OPP.non-reductive PP.transketolase
	Id: seq_1463
	(q43848|tktc_soltu : 242.0) Transketolase, chloroplast precursor (EC 2.2.1.1) (TK) - Solanum tuberosum (Potato) & (at2g45290 : 236.0) Transketolase; FUNCTIONS IN: catalytic activity, transketolase activity; INVOLVED IN: response to cadmium ion; LOCATED IN: chloroplast stroma, chloroplast; EXPRESSED IN: 25 plant structures; EXPRESSED DURING: 16 growth stages; CONTAINS InterPro DOMAIN/s: Transketol…
Bin: 7.2.1	OPP.non-reductive PP.transketolase
	Id: seq_1734
	(at2g45290 : 135.0) Transketolase; FUNCTIONS IN: catalytic activity, transketolase activity; INVOLVED IN: response to cadmium ion; LOCATED IN: chloroplast stroma, chloroplast; EXPRESSED IN: 25 plant structures; EXPRESSED DURING: 16 growth stages; CONTAINS InterPro DOMAIN/s: Transketolase, bacterial-like (InterPro:IPR005478), Transketolase, N-terminal (InterPro:IPR005474), Transketolase, C-termina…
Bin: 7.1.3	OPP.oxidative PP.6-phosphogluconate dehydrogenase
	Id: seq_357
	(at3g25530 : 413.0) Encodes gamma-hydroxybutyrate dehydrogenase (AtGHBDH). Contains a NADP-binding domain. GHBDH is proposed to function in oxidative stress tolerance.; glyoxylate reductase 1 (GLYR1); FUNCTIONS IN: 3-hydroxybutyrate dehydrogenase activity, phosphogluconate dehydrogenase (decarboxylating) activity; INVOLVED IN: response to oxidative stress; LOCATED IN: cytosol; EXPRESSED IN: 23 pl…
Bin: 7.1.3	OPP.oxidative PP.6-phosphogluconate dehydrogenase
	Id: seq_599
	(at5g41670 : 825.0) 6-phosphogluconate dehydrogenase family protein; FUNCTIONS IN: in 6 functions; INVOLVED IN: response to fructose stimulus, response to cadmium ion, response to sucrose stimulus, response to glucose stimulus; LOCATED IN: mitochondrion, chloroplast; EXPRESSED IN: 24 plant structures; EXPRESSED DURING: 14 growth stages; CONTAINS InterPro DOMAIN/s: 6-phosphogluconate dehydrogenase…
Bin: 7.1.3	OPP.oxidative PP.6-phosphogluconate dehydrogenase
	Id: seq_607
	(at3g02360 : 597.0) 6-phosphogluconate dehydrogenase family protein; FUNCTIONS IN: in 6 functions; INVOLVED IN: response to salt stress; LOCATED IN: peroxisome; EXPRESSED IN: 27 plant structures; EXPRESSED DURING: 16 growth stages; CONTAINS InterPro DOMAIN/s: 6-phosphogluconate dehydrogenase, NAD-binding (InterPro:IPR006115), 6-phosphogluconate dehydrogenase, C-terminal-like (InterPro:IPR008927),…
Bin: 7.1.3	OPP.oxidative PP.6-phosphogluconate dehydrogenase
	Id: seq_1112
	(at4g29120 : 471.0) 6-phosphogluconate dehydrogenase family protein; FUNCTIONS IN: coenzyme binding, oxidoreductase activity, phosphogluconate dehydrogenase (decarboxylating) activity, binding, catalytic activity; INVOLVED IN: oxidation reduction, pentose-phosphate shunt, metabolic process; EXPRESSED IN: 24 plant structures; EXPRESSED DURING: 14 growth stages; CONTAINS InterPro DOMAIN/s: 6-phosph…
Bin: 7.1.3	OPP.oxidative PP.6-phosphogluconate dehydrogenase
	Id: seq_1541
	(at3g02360 : 362.0) 6-phosphogluconate dehydrogenase family protein; FUNCTIONS IN: in 6 functions; INVOLVED IN: response to salt stress; LOCATED IN: peroxisome; EXPRESSED IN: 27 plant structures; EXPRESSED DURING: 16 growth stages; CONTAINS InterPro DOMAIN/s: 6-phosphogluconate dehydrogenase, NAD-binding (InterPro:IPR006115), 6-phosphogluconate dehydrogenase, C-terminal-like (InterPro:IPR008927),…
Bin: 7.1.3	OPP.oxidative PP.6-phosphogluconate dehydrogenase
	Id: seq_1812
	(at4g29120 : 256.0) 6-phosphogluconate dehydrogenase family protein; FUNCTIONS IN: coenzyme binding, oxidoreductase activity, phosphogluconate dehydrogenase (decarboxylating) activity, binding, catalytic activity; INVOLVED IN: oxidation reduction, pentose-phosphate shunt, metabolic process; EXPRESSED IN: 24 plant structures; EXPRESSED DURING: 14 growth stages; CONTAINS InterPro DOMAIN/s: 6-phosph…
Bin: 7.1.3	OPP.oxidative PP.6-phosphogluconate dehydrogenase
	Id: seq_2263
	(at3g02360 : 150.0) 6-phosphogluconate dehydrogenase family protein; FUNCTIONS IN: in 6 functions; INVOLVED IN: response to salt stress; LOCATED IN: peroxisome; EXPRESSED IN: 27 plant structures; EXPRESSED DURING: 16 growth stages; CONTAINS InterPro DOMAIN/s: 6-phosphogluconate dehydrogenase, NAD-binding (InterPro:IPR006115), 6-phosphogluconate dehydrogenase, C-terminal-like (InterPro:IPR008927),…
Bin: 7.1.2	OPP.oxidative PP.6-phosphogluconolactonase
	Id: seq_738
	(at5g24400 : 355.0) Encodes a protein with 6-phosphoglucunolactonase activity that localizes to the chloroplasts and the peroxisome. However, mutant phenotypes observed in pgl3 mutant plants can be complemented with a chloroplast-targeted version of the protein. PGL3 likely functions in the oxidative branch of the pentose phosphate pathway. pgl3 mutant phenotypes suggest that it is important in p…
Bin: 7.1.2	OPP.oxidative PP.6-phosphogluconolactonase
	Id: seq_1003
	(at5g24400 : 353.0) Encodes a protein with 6-phosphoglucunolactonase activity that localizes to the chloroplasts and the peroxisome. However, mutant phenotypes observed in pgl3 mutant plants can be complemented with a chloroplast-targeted version of the protein. PGL3 likely functions in the oxidative branch of the pentose phosphate pathway. pgl3 mutant phenotypes suggest that it is important in p…
Bin: 7.1.2	OPP.oxidative PP.6-phosphogluconolactonase
	Id: seq_1909
	(at1g13700 : 168.0) 6-phosphogluconolactonase 1 (PGL1); FUNCTIONS IN: 6-phosphogluconolactonase activity, catalytic activity; INVOLVED IN: pentose-phosphate shunt, carbohydrate metabolic process; LOCATED IN: cellular_component unknown; EXPRESSED IN: 11 plant structures; EXPRESSED DURING: LP.06 six leaves visible, LP.04 four leaves visible, 4 anthesis, petal differentiation and expansion stage; CO…
Bin: 7.1.1	OPP.oxidative PP.G6PD
	Id: seq_787
	(at5g40760 : 620.0) Encodes a cytosolic glucose-6-phosphate dehydrogenase that is insensitive to reduction by DTT and whose mRNA is expressed ubiquitously.; glucose-6-phosphate dehydrogenase 6 (G6PD6); CONTAINS InterPro DOMAIN/s: Glucose-6-phosphate dehydrogenase, C-terminal (InterPro:IPR022675), Glucose-6-phosphate dehydrogenase, active site (InterPro:IPR019796), NAD(P)-binding domain (InterPro:…
Bin: 7.1.1	OPP.oxidative PP.G6PD
	Id: seq_883
	(at5g35790 : 920.0) Encodes a plastidic glucose-6-phosphate dehydrogenase that is sensitive to reduction by DTT and whose mRNA is more prevalent in developing organs but absent in the root.; glucose-6-phosphate dehydrogenase 1 (G6PD1); FUNCTIONS IN: glucose-6-phosphate dehydrogenase activity, protein binding; INVOLVED IN: pentose-phosphate shunt, oxidative branch, glucose metabolic process; LOCAT…
Bin: 7.1.1	OPP.oxidative PP.G6PD
	Id: seq_1506
	(p37830|g6pd_soltu : 217.0) Glucose-6-phosphate 1-dehydrogenase, cytoplasmic isoform (EC 1.1.1.49) (G6PD) - Solanum tuberosum (Potato) & (at5g40760 : 204.0) Encodes a cytosolic glucose-6-phosphate dehydrogenase that is insensitive to reduction by DTT and whose mRNA is expressed ubiquitously.; glucose-6-phosphate dehydrogenase 6 (G6PD6); CONTAINS InterPro DOMAIN/s: Glucose-6-phosphate dehydrogenas…
8. TCA / org transformation
Bin: 8.3	TCA / org transformation.carbonic anhydrases
	Id: seq_169
	(p27141|cahc_tobac : 369.0) Carbonic anhydrase, chloroplast precursor (EC 4.2.1.1) (Carbonate dehydratase) - Nicotiana tabacum (Common tobacco) & (at5g14740 : 359.0) Encodes a beta carbonic anhydrase likely to be localized in the cytoplasm. Expression of its mRNA is seen in etiolated seedlings and points to a possible nonphotosynthetic role for this isoform.; carbonic anhydrase 2 (CA2); FUNCTIONS…
Bin: 8.3	TCA / org transformation.carbonic anhydrases
	Id: seq_834
	(p17067|cahc_pea : 159.0) Carbonic anhydrase, chloroplast precursor (EC 4.2.1.1) (Carbonate dehydratase) [Contains: Carbonic anhydrase, 27 kDa isoform; Carbonic anhydrase, 25 kDa isoform] - Pisum sativum (Garden pea) & (at5g14740 : 155.0) Encodes a beta carbonic anhydrase likely to be localized in the cytoplasm. Expression of its mRNA is seen in etiolated seedlings and points to a possible nonpho…
Bin: 8.3	TCA / org transformation.carbonic anhydrases
	Id: seq_1301
	(p27141|cahc_tobac : 128.0) Carbonic anhydrase, chloroplast precursor (EC 4.2.1.1) (Carbonate dehydratase) - Nicotiana tabacum (Common tobacco) & (at1g70410 : 126.0) Encodes a putative beta-carbonic anhydrase betaCA4. Together with betaCA1 (At3g01500) regulates CO2-controlled stomatal movements in guard cells.; beta carbonic anhydrase 4 (BCA4); FUNCTIONS IN: carbonate dehydratase activity, zinc i…
Bin: 8.3	TCA / org transformation.carbonic anhydrases
	Id: seq_1649
	(at3g01500 : 99.4) Encodes a putative beta-carbonic anhydrase betaCA1. Together with betaCA4 (At1g70410) regulates CO2-controlled stomatal movements in guard cells.; carbonic anhydrase 1 (CA1); FUNCTIONS IN: carbonate dehydratase activity, zinc ion binding; INVOLVED IN: in 6 processes; LOCATED IN: in 7 components; EXPRESSED IN: 22 plant structures; EXPRESSED DURING: 14 growth stages; CONTAINS Int…
Bin: 8.3	TCA / org transformation.carbonic anhydrases
	Id: seq_1879
	(at3g01500 : 125.0) Encodes a putative beta-carbonic anhydrase betaCA1. Together with betaCA4 (At1g70410) regulates CO2-controlled stomatal movements in guard cells.; carbonic anhydrase 1 (CA1); FUNCTIONS IN: carbonate dehydratase activity, zinc ion binding; INVOLVED IN: in 6 processes; LOCATED IN: in 7 components; EXPRESSED IN: 22 plant structures; EXPRESSED DURING: 14 growth stages; CONTAINS In…
Bin: 8.2.99	TCA / org transformation.other organic acid transformatons.misc
	Id: seq_58
	(at1g79440 : 767.0) Encodes a mitochondrial succinic semialdehyde dehydrogenase (SSADH). Nomenclature according to Kirch, et al (2004).; aldehyde dehydrogenase 5F1 (ALDH5F1); FUNCTIONS IN: 3-chloroallyl aldehyde dehydrogenase activity, NAD or NADH binding, copper ion binding, succinate-semialdehyde dehydrogenase activity; INVOLVED IN: in 6 processes; LOCATED IN: mitochondrion, chloroplast, mitoch…
Bin: 8.2.11	TCA / org transformation.other organic acid transformatons.atp-citrate lyase
	Id: seq_305
	(at1g09430 : 776.0) Encodes subunit A of the heteromeric enzyme ATP citrate lyase (ACL). In animals, ACL is encoded by a single gene; ACL in Arabidopsis is composed of two polypeptides, ACLA (encoded by 3 genes) and ACLB (encoded by 2 genes). The holoenzyme has an A(4)B(4)stoichiometry. Expression of both ACLA and ACLB but not of either of the subunits alone results in ACL activity.; ATP-citrate …
Bin: 8.2.11	TCA / org transformation.other organic acid transformatons.atp-citrate lyase
	Id: seq_567
	(at3g06650 : 1132.0) One of the two genes encoding subunit B of the trimeric enzyme ATP Citrate lyase; ATP-citrate lyase B-1 (ACLB-1); FUNCTIONS IN: ATP citrate synthase activity; INVOLVED IN: acetyl-CoA biosynthetic process; LOCATED IN: citrate lyase complex, membrane; EXPRESSED IN: 23 plant structures; EXPRESSED DURING: 14 growth stages; CONTAINS InterPro DOMAIN/s: Succinyl-CoA synthetase, beta…
Bin: 8.2.10	TCA / org transformation.other organic acid transformatons.malic
	Id: seq_180
	(at2g13560 : 687.0) Encodes an NAD-dependent malic enzyme (NAD-ME) that does not act on oxaloacetate, indicating that it belongs to EC 1.1.1.39. It is a member of the alpha family of NAD-MEs in plants. It appears to function as a homodimer or as a heterodimer with the beta-type NAD-ME2 (At4g00570). NAD-ME1 transcript and protein levels are higher during the night than during the day.; NAD-depende…
Bin: 8.2.10	TCA / org transformation.other organic acid transformatons.malic
	Id: seq_349
	(p51615|maox_vitvi : 976.0) NADP-dependent malic enzyme (EC 1.1.1.40) (NADP-ME) - Vitis vinifera (Grape) & (gnl|cdd|36471 : 905.0) no description available & (at2g19900 : 900.0) The malic enzyme (EC 1.1.1.40) encoded by AtNADP-ME1 is expressed in response to developmental and cell-specific signals. The enzyme is active in vitro and appears to function as a homohexamer or homooctamer. It is believ…
Bin: 8.2.10	TCA / org transformation.other organic acid transformatons.malic
	Id: seq_1041
	(p37225|maon_soltu : 662.0) NAD-dependent malic enzyme 59 kDa isoform, mitochondrial precursor (EC 1.1.1.39) (NAD-ME) - Solanum tuberosum (Potato) & (at4g00570 : 627.0) Encodes an NAD-dependent malic enzyme (NAD-ME) that does not act on oxaloacetate, indicating that it belongs to EC 1.1.1.39. It is a member of the beta family of NAD-MEs in plants. It appears to function as a homodimer or as a het…
Bin: 8.2.10	TCA / org transformation.other organic acid transformatons.malic
	Id: seq_2150
	(at4g00570 : 87.8) Encodes an NAD-dependent malic enzyme (NAD-ME) that does not act on oxaloacetate, indicating that it belongs to EC 1.1.1.39. It is a member of the beta family of NAD-MEs in plants. It appears to function as a homodimer or as a heterodimer with the alpha-type NAD-ME2 (At2g13560). NAD-ME2 transcript and protein levels are higher during the night than during the day.; NAD-dependen…
Bin: 8.2.9	TCA / org transformation.other organic acid transformatons.cyt MDH
	Id: seq_102
	(o48905|mdhc_medsa : 573.0) Malate dehydrogenase, cytoplasmic (EC 1.1.1.37) - Medicago sativa (Alfalfa) & (at1g04410 : 563.0) Lactate/malate dehydrogenase family protein; FUNCTIONS IN: in 6 functions; INVOLVED IN: response to cadmium ion, response to zinc ion, response to salt stress; LOCATED IN: in 7 components; EXPRESSED IN: 26 plant structures; EXPRESSED DURING: 15 growth stages; CONTAINS Inte…
Bin: 8.2.9	TCA / org transformation.other organic acid transformatons.cyt MDH
	Id: seq_702
	(o48902|mdhp_medsa : 739.0) Malate dehydrogenase [NADP], chloroplast precursor (EC 1.1.1.82) (NADP-MDH) - Medicago sativa (Alfalfa) & (at5g58330 : 699.0) lactate/malate dehydrogenase family protein; FUNCTIONS IN: in 6 functions; INVOLVED IN: in 6 processes; LOCATED IN: thylakoid, mitochondrion, apoplast, chloroplast; EXPRESSED IN: 23 plant structures; EXPRESSED DURING: 14 growth stages; CONTAINS …
Bin: 8.2.9	TCA / org transformation.other organic acid transformatons.cyt MDH
	Id: seq_727
	(at3g47520 : 525.0) Encodes a protein with NAD-dependent malate dehydrogenase activity, located in chloroplasts.; malate dehydrogenase (MDH); FUNCTIONS IN: in 6 functions; INVOLVED IN: response to cold; LOCATED IN: in 8 components; EXPRESSED IN: 25 plant structures; EXPRESSED DURING: 14 growth stages; CONTAINS InterPro DOMAIN/s: Lactate/malate dehydrogenase, C-terminal (InterPro:IPR022383), Malat…
Bin: 8.2.9	TCA / org transformation.other organic acid transformatons.cyt MDH
	Id: seq_1719
	(at3g47520 : 141.0) Encodes a protein with NAD-dependent malate dehydrogenase activity, located in chloroplasts.; malate dehydrogenase (MDH); FUNCTIONS IN: in 6 functions; INVOLVED IN: response to cold; LOCATED IN: in 8 components; EXPRESSED IN: 25 plant structures; EXPRESSED DURING: 14 growth stages; CONTAINS InterPro DOMAIN/s: Lactate/malate dehydrogenase, C-terminal (InterPro:IPR022383), Malat…
Bin: 8.2.4	TCA / org transformation.other organic acid transformatons.IDH
	Id: seq_924
	(at5g03290 : 638.0) Encodes a catalytic subunit of the mitochondrially-localized NAD+- dependent isocitrate dehydrogenase.; isocitrate dehydrogenase V (IDH-V); FUNCTIONS IN: isocitrate dehydrogenase (NAD+) activity, zinc ion binding, ATP binding; INVOLVED IN: isocitrate metabolic process, tricarboxylic acid cycle, metabolic process; LOCATED IN: mitochondrion, chloroplast; EXPRESSED IN: 24 plant s…
Bin: 8.2.4	TCA / org transformation.other organic acid transformatons.IDH
	Id: seq_1073
	(at4g35260 : 278.0) Encodes a regulatory subunit of the mitochondrially-localized NAD+- dependent isocitrate dehydrogenase.; isocitrate dehydrogenase 1 (IDH1); CONTAINS InterPro DOMAIN/s: Isocitrate/isopropylmalate dehydrogenase (InterPro:IPR001804), Isocitrate dehydrogenase NAD-dependent, mitochondrial (InterPro:IPR004434); BEST Arabidopsis thaliana protein match is: isocitrate dehydrogenase sub…
Bin: 8.2.4	TCA / org transformation.other organic acid transformatons.IDH
	Id: seq_1619
	(at4g35260 : 241.0) Encodes a regulatory subunit of the mitochondrially-localized NAD+- dependent isocitrate dehydrogenase.; isocitrate dehydrogenase 1 (IDH1); CONTAINS InterPro DOMAIN/s: Isocitrate/isopropylmalate dehydrogenase (InterPro:IPR001804), Isocitrate dehydrogenase NAD-dependent, mitochondrial (InterPro:IPR004434); BEST Arabidopsis thaliana protein match is: isocitrate dehydrogenase sub…
Bin: 8.2.4	TCA / org transformation.other organic acid transformatons.IDH
	Id: seq_1867
	(gnl|cdd|36003 : 163.0) no description available & (at4g35260 : 160.0) Encodes a regulatory subunit of the mitochondrially-localized NAD+- dependent isocitrate dehydrogenase.; isocitrate dehydrogenase 1 (IDH1); CONTAINS InterPro DOMAIN/s: Isocitrate/isopropylmalate dehydrogenase (InterPro:IPR001804), Isocitrate dehydrogenase NAD-dependent, mitochondrial (InterPro:IPR004434); BEST Arabidopsis thal…
Bin: 8.2.4	TCA / org transformation.other organic acid transformatons.IDH
	Id: seq_2045
	(at4g35260 : 276.0) Encodes a regulatory subunit of the mitochondrially-localized NAD+- dependent isocitrate dehydrogenase.; isocitrate dehydrogenase 1 (IDH1); CONTAINS InterPro DOMAIN/s: Isocitrate/isopropylmalate dehydrogenase (InterPro:IPR001804), Isocitrate dehydrogenase NAD-dependent, mitochondrial (InterPro:IPR004434); BEST Arabidopsis thaliana protein match is: isocitrate dehydrogenase sub…
Bin: 8.1.9	TCA / org transformation.TCA.malate DH
	Id: seq_693
	(p83373|mdhm_fraan : 551.0) Malate dehydrogenase, mitochondrial precursor (EC 1.1.1.37) - Fragaria ananassa (Strawberry) & (at1g53240 : 549.0) Lactate/malate dehydrogenase family protein; FUNCTIONS IN: malate dehydrogenase activity, copper ion binding; INVOLVED IN: response to cadmium ion, response to salt stress, response to cold, defense response to bacterium, peptidyl-cysteine S-nitrosylation;…
Bin: 8.1.9	TCA / org transformation.TCA.malate DH
	Id: seq_1319
	(p83373|mdhm_fraan : 554.0) Malate dehydrogenase, mitochondrial precursor (EC 1.1.1.37) - Fragaria ananassa (Strawberry) & (at1g53240 : 551.0) Lactate/malate dehydrogenase family protein; FUNCTIONS IN: malate dehydrogenase activity, copper ion binding; INVOLVED IN: response to cadmium ion, response to salt stress, response to cold, defense response to bacterium, peptidyl-cysteine S-nitrosylation;…
Bin: 8.1.8	TCA / org transformation.TCA.fumarase
	Id: seq_1870
	(at2g47510 : 223.0) Encodes a mitochondrial-localized protein. The FUM1 gene appears to be essential, suggesting that FUM1 may play a crucial role as a fumarase in the tricarboxylic acid cycle.; fumarase 1 (FUM1); FUNCTIONS IN: fumarate hydratase activity, protein binding; INVOLVED IN: response to oxidative stress, response to salt stress, pollen tube development; LOCATED IN: mitochondrion; EXPRE…
Bin: 8.1.8	TCA / org transformation.TCA.fumarase
	Id: seq_2014
	(at5g50950 : 203.0) Encodes a fumarase enzyme initially shown to be in the mitochondria through proteomic studies but later shown to be present in the cytosol using an RFP fluorescent protein tag. It appears to be important for the accumulation of fumarate from malate in leaves in the light, and helps to promote nitrogen assimilation under high nitrogen conditions. It does not appear to be necess…
Bin: 8.1.8	TCA / org transformation.TCA.fumarase
	Id: seq_2243
	(at5g50950 : 155.0) Encodes a fumarase enzyme initially shown to be in the mitochondria through proteomic studies but later shown to be present in the cytosol using an RFP fluorescent protein tag. It appears to be important for the accumulation of fumarate from malate in leaves in the light, and helps to promote nitrogen assimilation under high nitrogen conditions. It does not appear to be necess…
Bin: 8.1.7	TCA / org transformation.TCA.succinate dehydrogenase
	Id: seq_276
	(at5g66760 : 1139.0) One of two genes in Arabidopsis that encode a flavoprotein subunit of the mitochondrial succinate dehydrogenase complex.; succinate dehydrogenase 1-1 (SDH1-1); FUNCTIONS IN: cobalt ion binding, succinate dehydrogenase activity, ATP binding; INVOLVED IN: mitochondrial electron transport, succinate to ubiquinone; LOCATED IN: mitochondrial respiratory chain complex II, mitochond…
Bin: 8.1.7	TCA / org transformation.TCA.succinate dehydrogenase
	Id: seq_835
	(at5g40650 : 464.0) One of three isoforms of the iron-sulfur component of the succinate dehydrogenase complex, a component of the mitochondrial respiratory chain complex II. The product of the nuclear encoded gene is imported into the mitochondrion. Expressed during germination and post-germinative growth.; succinate dehydrogenase 2-2 (SDH2-2); CONTAINS InterPro DOMAIN/s: Ferredoxin (InterPro:IPR…
Bin: 8.1.6	TCA / org transformation.TCA.succinyl-CoA ligase
	Id: seq_469
	(at2g20420 : 699.0) ATP citrate lyase (ACL) family protein; FUNCTIONS IN: succinate-CoA ligase (GDP-forming) activity, copper ion binding, ATP binding; INVOLVED IN: response to cadmium ion, metabolic process; LOCATED IN: mitochondrion; EXPRESSED IN: 26 plant structures; EXPRESSED DURING: 16 growth stages; CONTAINS InterPro DOMAIN/s: Succinyl-CoA synthetase, beta subunit (InterPro:IPR005809), Succ…
Bin: 8.1.6	TCA / org transformation.TCA.succinyl-CoA ligase
	Id: seq_1248
	(at5g23250 : 513.0) Succinyl-CoA ligase, alpha subunit; FUNCTIONS IN: succinate-CoA ligase (GDP-forming) activity, copper ion binding; INVOLVED IN: metabolic process; LOCATED IN: mitochondrion; EXPRESSED IN: 23 plant structures; EXPRESSED DURING: 14 growth stages; CONTAINS InterPro DOMAIN/s: Succinyl-CoA ligase, alpha subunit (InterPro:IPR005810), ATP-citrate lyase/succinyl-CoA ligase (InterPro:I…
Bin: 8.1.6	TCA / org transformation.TCA.succinyl-CoA ligase
	Id: seq_1601
	(at2g20420 : 147.0) ATP citrate lyase (ACL) family protein; FUNCTIONS IN: succinate-CoA ligase (GDP-forming) activity, copper ion binding, ATP binding; INVOLVED IN: response to cadmium ion, metabolic process; LOCATED IN: mitochondrion; EXPRESSED IN: 26 plant structures; EXPRESSED DURING: 16 growth stages; CONTAINS InterPro DOMAIN/s: Succinyl-CoA synthetase, beta subunit (InterPro:IPR005809), Succ…
Bin: 8.1.5	TCA / org transformation.TCA.2-oxoglutarate dehydrogenase
	Id: seq_148
	(at5g65750 : 1934.0) 2-oxoglutarate dehydrogenase, E1 component; FUNCTIONS IN: oxoglutarate dehydrogenase (succinyl-transferring) activity, cobalt ion binding, zinc ion binding; INVOLVED IN: response to cadmium ion; LOCATED IN: mitochondrion; EXPRESSED IN: 23 plant structures; EXPRESSED DURING: 11 growth stages; CONTAINS InterPro DOMAIN/s: 2-oxoglutarate dehydrogenase, E1 component (InterPro:IPR0…
Bin: 8.1.5	TCA / org transformation.TCA.2-oxoglutarate dehydrogenase
	Id: seq_262
	(at3g55410 : 1908.0) 2-oxoglutarate dehydrogenase, E1 component; FUNCTIONS IN: oxoglutarate dehydrogenase (succinyl-transferring) activity, cobalt ion binding, zinc ion binding; INVOLVED IN: glycolysis, metabolic process; LOCATED IN: mitochondrion; EXPRESSED IN: 25 plant structures; EXPRESSED DURING: 15 growth stages; CONTAINS InterPro DOMAIN/s: 2-oxoglutarate dehydrogenase, E1 component (InterPr…
Bin: 8.1.5	TCA / org transformation.TCA.2-oxoglutarate dehydrogenase
	Id: seq_296
	(at5g55070 : 569.0) Dihydrolipoamide succinyltransferase; FUNCTIONS IN: zinc ion binding, acyltransferase activity; INVOLVED IN: response to oxidative stress, metabolic process; LOCATED IN: cytosolic ribosome, mitochondrion; EXPRESSED IN: 27 plant structures; EXPRESSED DURING: 15 growth stages; CONTAINS InterPro DOMAIN/s: 2-oxo acid dehydrogenase, lipoyl-binding site (InterPro:IPR003016), Dihydro…
Bin: 8.1.5	TCA / org transformation.TCA.2-oxoglutarate dehydrogenase
	Id: seq_298
	(gnl|cdd|35779 : 544.0) no description available & (at5g55070 : 509.0) Dihydrolipoamide succinyltransferase; FUNCTIONS IN: zinc ion binding, acyltransferase activity; INVOLVED IN: response to oxidative stress, metabolic process; LOCATED IN: cytosolic ribosome, mitochondrion; EXPRESSED IN: 27 plant structures; EXPRESSED DURING: 15 growth stages; CONTAINS InterPro DOMAIN/s: 2-oxo acid dehydrogenase…
Bin: 8.1.5	TCA / org transformation.TCA.2-oxoglutarate dehydrogenase
	Id: seq_1427
	(at5g55070 : 140.0) Dihydrolipoamide succinyltransferase; FUNCTIONS IN: zinc ion binding, acyltransferase activity; INVOLVED IN: response to oxidative stress, metabolic process; LOCATED IN: cytosolic ribosome, mitochondrion; EXPRESSED IN: 27 plant structures; EXPRESSED DURING: 15 growth stages; CONTAINS InterPro DOMAIN/s: 2-oxo acid dehydrogenase, lipoyl-binding site (InterPro:IPR003016), Dihydro…
Bin: 8.1.5	TCA / org transformation.TCA.2-oxoglutarate dehydrogenase
	Id: seq_1863
	(gnl|cdd|35779 : 539.0) no description available & (at5g55070 : 512.0) Dihydrolipoamide succinyltransferase; FUNCTIONS IN: zinc ion binding, acyltransferase activity; INVOLVED IN: response to oxidative stress, metabolic process; LOCATED IN: cytosolic ribosome, mitochondrion; EXPRESSED IN: 27 plant structures; EXPRESSED DURING: 15 growth stages; CONTAINS InterPro DOMAIN/s: 2-oxo acid dehydrogenase…
Bin: 8.1.4	TCA / org transformation.TCA.IDH
	Id: seq_438
	(q40345|idhp_medsa : 786.0) Isocitrate dehydrogenase [NADP], chloroplast precursor (EC 1.1.1.42) (Oxalosuccinate decarboxylase) (IDH) (NADP(+)-specific ICDH) (IDP) (Fragment) - Medicago sativa (Alfalfa) & (at1g65930 : 770.0) Encodes a NADP+-isocitrate dehydrogenase that is believed to function in the cytosol. It appears to contribute to NADPH production under oxidative stress, and thereby to part…
Bin: 8.1.4	TCA / org transformation.TCA.IDH
	Id: seq_602
	(gnl|cdd|36739 : 767.0) no description available & (p50218|idhc_tobac : 764.0) Isocitrate dehydrogenase [NADP] (EC 1.1.1.42) (Oxalosuccinate decarboxylase) (IDH) (NADP(+)-specific ICDH) (IDP) - Nicotiana tabacum (Common tobacco) & (at1g54340 : 754.0) NADP-specific isocitrate dehydrogenase (ICDH); isocitrate dehydrogenase (ICDH); FUNCTIONS IN: NAD or NADH binding, isocitrate dehydrogenase (NADP+) …
Bin: 8.1.4	TCA / org transformation.TCA.IDH
	Id: seq_1073
	(at4g35260 : 278.0) Encodes a regulatory subunit of the mitochondrially-localized NAD+- dependent isocitrate dehydrogenase.; isocitrate dehydrogenase 1 (IDH1); CONTAINS InterPro DOMAIN/s: Isocitrate/isopropylmalate dehydrogenase (InterPro:IPR001804), Isocitrate dehydrogenase NAD-dependent, mitochondrial (InterPro:IPR004434); BEST Arabidopsis thaliana protein match is: isocitrate dehydrogenase sub…
Bin: 8.1.4	TCA / org transformation.TCA.IDH
	Id: seq_1157
	(gnl|cdd|36739 : 756.0) no description available & (at5g14590 : 755.0) Isocitrate/isopropylmalate dehydrogenase family protein; FUNCTIONS IN: NAD or NADH binding, isocitrate dehydrogenase (NADP+) activity, magnesium ion binding, oxidoreductase activity, acting on the CH-OH group of donors, NAD or NADP as acceptor; INVOLVED IN: oxidation reduction, isocitrate metabolic process, metabolic process; …
Bin: 8.1.4	TCA / org transformation.TCA.IDH
	Id: seq_1619
	(at4g35260 : 241.0) Encodes a regulatory subunit of the mitochondrially-localized NAD+- dependent isocitrate dehydrogenase.; isocitrate dehydrogenase 1 (IDH1); CONTAINS InterPro DOMAIN/s: Isocitrate/isopropylmalate dehydrogenase (InterPro:IPR001804), Isocitrate dehydrogenase NAD-dependent, mitochondrial (InterPro:IPR004434); BEST Arabidopsis thaliana protein match is: isocitrate dehydrogenase sub…
Bin: 8.1.4	TCA / org transformation.TCA.IDH
	Id: seq_1867
	(gnl|cdd|36003 : 163.0) no description available & (at4g35260 : 160.0) Encodes a regulatory subunit of the mitochondrially-localized NAD+- dependent isocitrate dehydrogenase.; isocitrate dehydrogenase 1 (IDH1); CONTAINS InterPro DOMAIN/s: Isocitrate/isopropylmalate dehydrogenase (InterPro:IPR001804), Isocitrate dehydrogenase NAD-dependent, mitochondrial (InterPro:IPR004434); BEST Arabidopsis thal…
Bin: 8.1.4	TCA / org transformation.TCA.IDH
	Id: seq_2045
	(at4g35260 : 276.0) Encodes a regulatory subunit of the mitochondrially-localized NAD+- dependent isocitrate dehydrogenase.; isocitrate dehydrogenase 1 (IDH1); CONTAINS InterPro DOMAIN/s: Isocitrate/isopropylmalate dehydrogenase (InterPro:IPR001804), Isocitrate dehydrogenase NAD-dependent, mitochondrial (InterPro:IPR004434); BEST Arabidopsis thaliana protein match is: isocitrate dehydrogenase sub…
Bin: 8.1.3	TCA / org transformation.TCA.aconitase
	Id: seq_635
	(p49608|acoc_cucma : 1699.0) Aconitate hydratase, cytoplasmic (EC 4.2.1.3) (Citrate hydro-lyase) (Aconitase) - Cucurbita maxima (Pumpkin) (Winter squash) & (at2g05710 : 1695.0) Encodes an aconitase that can catalyze the conversion of citrate to isocitrate through a cis-aconitate intermediate, indicating that it may participate in the TCA cycle and other primary metabolic pathways. The protein is …
Bin: 8.1.3	TCA / org transformation.TCA.aconitase
	Id: seq_1288
	(at4g35830 : 82.8) Encodes an aconitase that can catalyze the conversion of citrate to isocitrate through a cis-aconitate intermediate, indicating that it may participate in the TCA cycle and other primary metabolic pathways. The protein is believed to accumulate in the mitochondria and the cytosol. It affects CSD2 (At2g28190 - a superoxide dismutase) transcript levels and may play a role in the …
Bin: 8.1.3	TCA / org transformation.TCA.aconitase
	Id: seq_1648
	(gnl|cdd|35673 : 348.0) no description available & (gnl|cdd|82907 : 331.0) no description available & (at4g35830 : 320.0) Encodes an aconitase that can catalyze the conversion of citrate to isocitrate through a cis-aconitate intermediate, indicating that it may participate in the TCA cycle and other primary metabolic pathways. The protein is believed to accumulate in the mitochondria and the cyto…
Bin: 8.1.3	TCA / org transformation.TCA.aconitase
	Id: seq_1710
	(at4g35830 : 257.0) Encodes an aconitase that can catalyze the conversion of citrate to isocitrate through a cis-aconitate intermediate, indicating that it may participate in the TCA cycle and other primary metabolic pathways. The protein is believed to accumulate in the mitochondria and the cytosol. It affects CSD2 (At2g28190 - a superoxide dismutase) transcript levels and may play a role in the…
Bin: 8.1.3	TCA / org transformation.TCA.aconitase
	Id: seq_1892
	(at4g35830 : 150.0) Encodes an aconitase that can catalyze the conversion of citrate to isocitrate through a cis-aconitate intermediate, indicating that it may participate in the TCA cycle and other primary metabolic pathways. The protein is believed to accumulate in the mitochondria and the cytosol. It affects CSD2 (At2g28190 - a superoxide dismutase) transcript levels and may play a role in the…
Bin: 8.1.3	TCA / org transformation.TCA.aconitase
	Id: seq_2032
	(p49608|acoc_cucma : 148.0) Aconitate hydratase, cytoplasmic (EC 4.2.1.3) (Citrate hydro-lyase) (Aconitase) - Cucurbita maxima (Pumpkin) (Winter squash) & (at2g05710 : 147.0) Encodes an aconitase that can catalyze the conversion of citrate to isocitrate through a cis-aconitate intermediate, indicating that it may participate in the TCA cycle and other primary metabolic pathways. The protein is be…
Bin: 8.1.3	TCA / org transformation.TCA.aconitase
	Id: seq_2266
	(p49608|acoc_cucma : 93.6) Aconitate hydratase, cytoplasmic (EC 4.2.1.3) (Citrate hydro-lyase) (Aconitase) - Cucurbita maxima (Pumpkin) (Winter squash) & (at4g35830 : 92.0) Encodes an aconitase that can catalyze the conversion of citrate to isocitrate through a cis-aconitate intermediate, indicating that it may participate in the TCA cycle and other primary metabolic pathways. The protein is beli…
Bin: 8.1.2	TCA / org transformation.TCA.CS
	Id: seq_1631
	(o80433|cisy_dauca : 752.0) Citrate synthase, mitochondrial precursor (EC 2.3.3.1) - Daucus carota (Carrot) & (at2g44350 : 741.0) encodes a mitochrondrion targeted citrate synthase, the first enzyme of the tricarboxylic acid cycle, catalyzing the condensation of acetyl-CoA and oxaloacetate, finally yielding citrate and CoA.; ATCS; FUNCTIONS IN: citrate (SI)-synthase activity, zinc ion binding, AT…
Bin: 8.1.1.3	TCA / org transformation.TCA.pyruvate DH.E3
	Id: seq_218
	(at3g16950 : 153.0) encodes a plastid lipoamide dehydrogenase, subunit of the pyruvate dehydrogenase complex which provides acetyl-CoA for de novo fatty acid biosynthesis. The gene is highly expressed in developing seeds.; lipoamide dehydrogenase 1 (LPD1); CONTAINS InterPro DOMAIN/s: FAD-dependent pyridine nucleotide-disulphide oxidoreductase (InterPro:IPR013027), Pyridine nucleotide-disulphide o…
Bin: 8.1.1.3	TCA / org transformation.TCA.pyruvate DH.E3
	Id: seq_237
	(at1g48030 : 836.0) Encodes a mitochondrial lipoamide dehydrogenase whose expression is induced by light.; lipoamide dehydrogenase 1 (LPD1); FUNCTIONS IN: dihydrolipoyl dehydrogenase activity, copper ion binding, cobalt ion binding, zinc ion binding, ATP binding; INVOLVED IN: response to cadmium ion, response to light stimulus; LOCATED IN: mitochondrion, apoplast, mitochondrial respiratory chain …
Bin: 8.1.1.3	TCA / org transformation.TCA.pyruvate DH.E3
	Id: seq_1523
	(at3g16950 : 456.0) encodes a plastid lipoamide dehydrogenase, subunit of the pyruvate dehydrogenase complex which provides acetyl-CoA for de novo fatty acid biosynthesis. The gene is highly expressed in developing seeds.; lipoamide dehydrogenase 1 (LPD1); CONTAINS InterPro DOMAIN/s: FAD-dependent pyridine nucleotide-disulphide oxidoreductase (InterPro:IPR013027), Pyridine nucleotide-disulphide o…
Bin: 8.1.1.2	TCA / org transformation.TCA.pyruvate DH.E2
	Id: seq_151
	(at3g13930 : 710.0) Dihydrolipoamide acetyltransferase, long form protein; FUNCTIONS IN: dihydrolipoyllysine-residue acetyltransferase activity, copper ion binding; INVOLVED IN: pyruvate metabolic process, metabolic process; LOCATED IN: mitochondrion, chloroplast, chloroplast envelope; EXPRESSED IN: 25 plant structures; EXPRESSED DURING: 13 growth stages; CONTAINS InterPro DOMAIN/s: 2-oxo acid de…
Bin: 8.1.1.2	TCA / org transformation.TCA.pyruvate DH.E2
	Id: seq_813
	(at3g52200 : 446.0) dihydrolipoamide S-acetyltransferase (LTA3) mRNA, nuclear; LTA3; FUNCTIONS IN: dihydrolipoyllysine-residue acetyltransferase activity; INVOLVED IN: pyruvate metabolic process, metabolic process; LOCATED IN: mitochondrion; EXPRESSED IN: 24 plant structures; EXPRESSED DURING: 13 growth stages; CONTAINS InterPro DOMAIN/s: 2-oxo acid dehydrogenase, lipoyl-binding site (InterPro:IP…
Bin: 8.1.1.2	TCA / org transformation.TCA.pyruvate DH.E2
	Id: seq_1283
	(at1g34430 : 505.0) embryo defective 3003 (EMB3003); FUNCTIONS IN: dihydrolipoyllysine-residue acetyltransferase activity, acyltransferase activity; INVOLVED IN: embryo development ending in seed dormancy; LOCATED IN: cytosolic ribosome, plasma membrane, chloroplast, chloroplast envelope; EXPRESSED IN: 23 plant structures; EXPRESSED DURING: 15 growth stages; CONTAINS InterPro DOMAIN/s: 2-oxo acid…
Bin: 8.1.1.1	TCA / org transformation.TCA.pyruvate DH.E1
	Id: seq_78
	(at1g01090 : 674.0) pyruvate dehydrogenase E1 alpha subunit; pyruvate dehydrogenase E1 alpha (PDH-E1 ALPHA); FUNCTIONS IN: pyruvate dehydrogenase (acetyl-transferring) activity; INVOLVED IN: oxidation reduction, glycolysis, metabolic process; LOCATED IN: chloroplast, plastid, chloroplast envelope; EXPRESSED IN: 25 plant structures; EXPRESSED DURING: 15 growth stages; CONTAINS InterPro DOMAIN/s: D…
Bin: 8.1.1.1	TCA / org transformation.TCA.pyruvate DH.E1
	Id: seq_240
	(at5g50850 : 613.0) MACCI-BOU (MAB1); FUNCTIONS IN: pyruvate dehydrogenase (acetyl-transferring) activity, catalytic activity; INVOLVED IN: defense response to bacterium; LOCATED IN: mitochondrion, nucleolus, plasma membrane; EXPRESSED IN: 25 plant structures; EXPRESSED DURING: 17 growth stages; CONTAINS InterPro DOMAIN/s: Transketolase, C-terminal (InterPro:IPR005476), Transketolase-like, C-term…
Bin: 8.1.1.1	TCA / org transformation.TCA.pyruvate DH.E1
	Id: seq_282
	(at2g34590 : 644.0) Transketolase family protein; FUNCTIONS IN: pyruvate dehydrogenase (acetyl-transferring) activity, zinc ion binding, transketolase activity; INVOLVED IN: pollen tube development; LOCATED IN: chloroplast, chloroplast envelope; EXPRESSED IN: 22 plant structures; EXPRESSED DURING: 14 growth stages; CONTAINS InterPro DOMAIN/s: Transketolase, C-terminal (InterPro:IPR005476), Transk…
Bin: 8.1.1.1	TCA / org transformation.TCA.pyruvate DH.E1
	Id: seq_1198
	(p52902|odpa_pea : 660.0) Pyruvate dehydrogenase E1 component subunit alpha, mitochondrial precursor (EC 1.2.4.1) (PDHE1-A) - Pisum sativum (Garden pea) & (at1g59900 : 642.0) encodes the e1 alpha subunit of the pyruvate dehydrogenase complex (PDC); pyruvate dehydrogenase complex E1 alpha subunit (E1 ALPHA); FUNCTIONS IN: oxidoreductase activity, acting on the aldehyde or oxo group of donors, disu…
Bin: 8.1.1.1	TCA / org transformation.TCA.pyruvate DH.E1
	Id: seq_1677
	(p52903|odpa_soltu : 144.0) Pyruvate dehydrogenase E1 component subunit alpha, mitochondrial precursor (EC 1.2.4.1) (PDHE1-A) - Solanum tuberosum (Potato) & (at1g24180 : 140.0) Arabidopsis thaliana pyruvate dehydrogenase E1a-like subunit. 81% identical to a previously characterized Arabidopsis mitochondrial PDH E1a-subunit, At1g59900; IAA-CONJUGATE-RESISTANT 4 (IAR4); FUNCTIONS IN: cobalt ion bin…
Bin: 8.1.1.1	TCA / org transformation.TCA.pyruvate DH.E1
	Id: seq_1800
	(at5g50850 : 412.0) MACCI-BOU (MAB1); FUNCTIONS IN: pyruvate dehydrogenase (acetyl-transferring) activity, catalytic activity; INVOLVED IN: defense response to bacterium; LOCATED IN: mitochondrion, nucleolus, plasma membrane; EXPRESSED IN: 25 plant structures; EXPRESSED DURING: 17 growth stages; CONTAINS InterPro DOMAIN/s: Transketolase, C-terminal (InterPro:IPR005476), Transketolase-like, C-term…
9. mitochondrial electron transport / ATP synthesis
Bin: 9.9	mitochondrial electron transport / ATP synthesis.F1-ATPase
	Id: seq_565
	(q01859|atpbm_orysa : 877.0) ATP synthase subunit beta, mitochondrial precursor (EC 3.6.3.14) - Oryza sativa (Rice) & (at5g08690 : 856.0) Encodes the mitochondrial ATP synthase beta-subunit. This subunit is encoded by a multigene family of three members (At5g08670, At5g08680, At5g08690) that shared 98% sequence identity at the amino acid level.; ATP synthase alpha/beta family protein; FUNCTIONS I…
Bin: 9.9	mitochondrial electron transport / ATP synthesis.F1-ATPase
	Id: seq_774
	(p26360|atpg3_ipoba : 490.0) ATP synthase gamma chain, mitochondrial precursor (EC 3.6.3.14) - Ipomoea batatas (Sweet potato) (Batate) & (at2g33040 : 481.0) gamma subunit of Mt ATP synthase (ATP3); FUNCTIONS IN: zinc ion binding; INVOLVED IN: proton transport, ATP synthesis coupled proton transport; LOCATED IN: in 7 components; EXPRESSED IN: 27 plant structures; EXPRESSED DURING: 17 growth stages…
Bin: 9.9	mitochondrial electron transport / ATP synthesis.F1-ATPase
	Id: seq_855
	(p22778|atpo_ipoba : 277.0) ATP synthase delta chain, mitochondrial precursor (EC 3.6.3.14) (Oligomycin sensitivity conferral protein) (OSCP) - Ipomoea batatas (Sweet potato) (Batate) & (at5g13450 : 239.0) delta subunit of Mt ATP synthase (ATP5); FUNCTIONS IN: hydrogen ion transporting ATP synthase activity, rotational mechanism, cobalt ion binding, zinc ion binding; INVOLVED IN: ATP synthesis co…
Bin: 9.9	mitochondrial electron transport / ATP synthesis.F1-ATPase
	Id: seq_1014
	(q40089|atp4_ipoba : 300.0) ATP synthase delta' chain, mitochondrial precursor (EC 3.6.3.14) - Ipomoea batatas (Sweet potato) (Batate) & (at5g47030 : 271.0) Encodes the mitochondrial ATP synthase subunit delta.; ATPase, F1 complex, delta/epsilon subunit; FUNCTIONS IN: hydrogen ion transporting ATP synthase activity, rotational mechanism, zinc ion binding; INVOLVED IN: response to salt stress; LOC…
Bin: 9.9	mitochondrial electron transport / ATP synthesis.F1-ATPase
	Id: seq_1299
	(at3g52300 : 224.0) "ATP synthase D chain, mitochondrial" (ATPQ); FUNCTIONS IN: copper ion binding, zinc ion binding; INVOLVED IN: response to salt stress; LOCATED IN: mitochondrion, cytosolic ribosome, nucleolus, chloroplast, plasma membrane; EXPRESSED IN: 27 plant structures; EXPRESSED DURING: 16 growth stages; Has 35333 Blast hits to 34131 proteins in 2444 species: Archae - 798; Bacteria - 224…
Bin: 9.9	mitochondrial electron transport / ATP synthesis.F1-ATPase
	Id: seq_2153
	(p18260|atpam_helan : 374.0) ATP synthase subunit alpha, mitochondrial (EC 3.6.3.14) - Helianthus annuus (Common sunflower) & (at2g07698 : 348.0) ATPase, F1 complex, alpha subunit protein; FUNCTIONS IN: hydrogen ion transporting ATP synthase activity, rotational mechanism, poly(U) RNA binding, zinc ion binding; INVOLVED IN: proton transport, ATP metabolic process, ATP synthesis coupled proton tra…
Bin: 9.9	mitochondrial electron transport / ATP synthesis.F1-ATPase
	Id: seq_2172
	(gnl|cdd|82910 : 198.0) no description available & (at2g07698 : 180.0) ATPase, F1 complex, alpha subunit protein; FUNCTIONS IN: hydrogen ion transporting ATP synthase activity, rotational mechanism, poly(U) RNA binding, zinc ion binding; INVOLVED IN: proton transport, ATP metabolic process, ATP synthesis coupled proton transport; LOCATED IN: in 7 components; EXPRESSED IN: male gametophyte, juveni…
Bin: 9.9	mitochondrial electron transport / ATP synthesis.F1-ATPase
	Id: seq_2179
	(p18260|atpam_helan : 288.0) ATP synthase subunit alpha, mitochondrial (EC 3.6.3.14) - Helianthus annuus (Common sunflower) & (at2g07698 : 286.0) ATPase, F1 complex, alpha subunit protein; FUNCTIONS IN: hydrogen ion transporting ATP synthase activity, rotational mechanism, poly(U) RNA binding, zinc ion binding; INVOLVED IN: proton transport, ATP metabolic process, ATP synthesis coupled proton tra…
Bin: 9.9	mitochondrial electron transport / ATP synthesis.F1-ATPase
	Id: seq_2187
	(gnl|cdd|82909 : 264.0) no description available & (gnl|cdd|36564 : 237.0) no description available & (at5g08690 : 235.0) Encodes the mitochondrial ATP synthase beta-subunit. This subunit is encoded by a multigene family of three members (At5g08670, At5g08680, At5g08690) that shared 98% sequence identity at the amino acid level.; ATP synthase alpha/beta family protein; FUNCTIONS IN: hydrogen ion …
Bin: 9.7	mitochondrial electron transport / ATP synthesis.cytochrome c oxidase
	Id: seq_420
	(at1g80230 : 181.0) Rubredoxin-like superfamily protein; FUNCTIONS IN: cytochrome-c oxidase activity; LOCATED IN: mitochondrial envelope, mitochondrion; EXPRESSED IN: 24 plant structures; EXPRESSED DURING: 15 growth stages; CONTAINS InterPro DOMAIN/s: Cytochrome c oxidase, subunit Vb (InterPro:IPR002124); BEST Arabidopsis thaliana protein match is: Rubredoxin-like superfamily protein (TAIR:AT3G15…
Bin: 9.7	mitochondrial electron transport / ATP synthesis.cytochrome c oxidase
	Id: seq_557
	(at1g22450 : 148.0) subunit 6b of cytochrome c oxidase; cytochrome C oxidase 6B (COX6B); FUNCTIONS IN: cytochrome-c oxidase activity, copper ion binding; INVOLVED IN: oxidation reduction, response to salt stress; LOCATED IN: thylakoid, mitochondrion, chloroplast thylakoid membrane, chloroplast; EXPRESSED IN: 24 plant structures; EXPRESSED DURING: 17 growth stages; CONTAINS InterPro DOMAIN/s: Cyto…
Bin: 9.7	mitochondrial electron transport / ATP synthesis.cytochrome c oxidase
	Id: seq_1681
	(at3g08950 : 115.0) Encodes HCC1, homologue of the copper chaperone SCO1 (synthesis of cytochrome c oxidase 1) from the yeast Saccharomyces cerevisiae. SCO1 encodes a mitochondrial protein that is essential for the correct assembly of complex IV in the respiratory chain. HCC1 is localized in the mitochondrion. A chimeric yeast Sco1-Arabidopsis HCC1 protein complements yeast Sco1 activity. Embryos…
Bin: 9.6	mitochondrial electron transport / ATP synthesis.cytochrome c
	Id: seq_1144
	(p00055|cyc_orysa : 200.0) Cytochrome c - Oryza sativa (Rice) & (at4g10040 : 197.0) Encodes cytochrome c. Promoter directs preferential expression in vascular tissues of cotyledons, leaves, roots, and hypocotyls, and in anthers.; cytochrome c-2 (CYTC-2); CONTAINS InterPro DOMAIN/s: Cytochrome c, class IA/ IB (InterPro:IPR002327), Cytochrome c, class I (InterPro:IPR003088), Cytochrome c domain (In…
Bin: 9.5	mitochondrial electron transport / ATP synthesis.cytochrome c reductase
	Id: seq_1549
	(at5g25450 : 176.0) Cytochrome bd ubiquinol oxidase, 14kDa subunit; FUNCTIONS IN: ubiquinol-cytochrome-c reductase activity; INVOLVED IN: mitochondrial electron transport, ubiquinol to cytochrome c; LOCATED IN: mitochondrion, mitochondrial respiratory chain complex III; EXPRESSED IN: 21 plant structures; EXPRESSED DURING: 13 growth stages; CONTAINS InterPro DOMAIN/s: Cytochrome d ubiquinol oxidas…
Bin: 9.3	mitochondrial electron transport / ATP synthesis.electron transfer flavoprotein
	Id: seq_1664
	(at5g43430 : 381.0) Encodes the electron transfer flavoprotein ETF beta, a putative subunit of the mitochondrial electron transfer flavoprotein complex (ETF alpha is At1g50940) in Arabidopsis. Mutations of the ETF beta gene result in accelerated senescence and early death compared to wild-type during extended darkness. Also involved in the catabolism of leucine and chlorophyll degradation pathway…
Bin: 9.1.2	mitochondrial electron transport / ATP synthesis.NADH-DH.localisation not clear
	Id: seq_778
	(at5g11770 : 332.0) NADH-ubiquinone oxidoreductase 20 kDa subunit, mitochondrial; FUNCTIONS IN: NADH dehydrogenase (ubiquinone) activity, zinc ion binding; INVOLVED IN: oxidation reduction, mitochondrial electron transport, NADH to ubiquinone; LOCATED IN: mitochondrion, respiratory chain complex I; EXPRESSED IN: 25 plant structures; EXPRESSED DURING: 15 growth stages; CONTAINS InterPro DOMAIN/s: …
Bin: 9.1.2	mitochondrial electron transport / ATP synthesis.NADH-DH.localisation not clear
	Id: seq_866
	(at5g52840 : 260.0) NADH-ubiquinone oxidoreductase-related; FUNCTIONS IN: oxidoreductase activity, acting on NADH or NADPH; INVOLVED IN: photorespiration; LOCATED IN: mitochondrion, mitochondrial membrane, chloroplast, respiratory chain complex I, membrane; EXPRESSED IN: 22 plant structures; EXPRESSED DURING: 15 growth stages; CONTAINS InterPro DOMAIN/s: ETC complex I subunit (InterPro:IPR006806)…
Bin: 9.1.2	mitochondrial electron transport / ATP synthesis.NADH-DH.localisation not clear
	Id: seq_927
	(at5g08530 : 883.0) 51 kDa subunit of complex I (CI51); FUNCTIONS IN: 4 iron, 4 sulfur cluster binding, NAD or NADH binding, FMN binding, NADH dehydrogenase (ubiquinone) activity, oxidoreductase activity, acting on NADH or NADPH; INVOLVED IN: oxidation reduction, mitochondrial electron transport, NADH to ubiquinone; LOCATED IN: mitochondrion, mitochondrial respiratory chain complex I, respiratory…
Bin: 9.1.2	mitochondrial electron transport / ATP synthesis.NADH-DH.localisation not clear
	Id: seq_970
	(at3g18410 : 105.0) Complex I subunit NDUFS6; FUNCTIONS IN: molecular_function unknown; INVOLVED IN: photorespiration; LOCATED IN: mitochondrion, mitochondrial membrane, mitochondrial respiratory chain complex I, respiratory chain complex I; CONTAINS InterPro DOMAIN/s: NADH-ubiquinone oxidoreductase, subunit 10 (InterPro:IPR019377), Complex I subunit NDUFS6 (InterPro:IPR020163); BEST Arabidopsis …
Bin: 9.1.2	mitochondrial electron transport / ATP synthesis.NADH-DH.localisation not clear
	Id: seq_1152
	(at4g02580 : 446.0) NADH-ubiquinone oxidoreductase 24 kDa subunit, putative; FUNCTIONS IN: NADH dehydrogenase (ubiquinone) activity, zinc ion binding; INVOLVED IN: response to oxidative stress, mitochondrial electron transport, NADH to ubiquinone; LOCATED IN: mitochondrion, mitochondrial respiratory chain complex I, respiratory chain complex I; EXPRESSED IN: 24 plant structures; EXPRESSED DURING:…
Bin: 9.1.2	mitochondrial electron transport / ATP synthesis.NADH-DH.localisation not clear
	Id: seq_1326
	(at3g03100 : 150.0) NADH:ubiquinone oxidoreductase, 17.2kDa subunit; CONTAINS InterPro DOMAIN/s: NADH:ubiquinone oxidoreductase, 17.2kDa subunit (InterPro:IPR007763); Has 35333 Blast hits to 34131 proteins in 2444 species: Archae - 798; Bacteria - 22429; Metazoa - 974; Fungi - 991; Plants - 531; Viruses - 0; Other Eukaryotes - 9610 (source: NCBI BLink). & (gnl|cdd|38592 : 100.0) no description av…
Bin: 9.1.2	mitochondrial electron transport / ATP synthesis.NADH-DH.localisation not clear
	Id: seq_1464
	(q43644|ndus1_soltu : 186.0) NADH-ubiquinone oxidoreductase 75 kDa subunit, mitochondrial precursor (EC 1.6.5.3) (EC 1.6.99.3) (Complex I-75kD) (CI-75kD) (76 kDa mitochondrial complex I subunit) - Solanum tuberosum (Potato) & (at5g37510 : 168.0) Encodes a subunit of the 400 kDa subcomplex of the mitochondrial NADH dehydrogenase (complex I). The protein has been isolated in the male gametophyte.; …
Bin: 9.1.2	mitochondrial electron transport / ATP synthesis.NADH-DH.localisation not clear
	Id: seq_1568
	(at2g20360 : 289.0) NAD(P)-binding Rossmann-fold superfamily protein; FUNCTIONS IN: coenzyme binding, binding, catalytic activity; INVOLVED IN: response to salt stress; LOCATED IN: mitochondrion, respiratory chain complex I, membrane; EXPRESSED IN: 27 plant structures; EXPRESSED DURING: 16 growth stages; CONTAINS InterPro DOMAIN/s: NAD-dependent epimerase/dehydratase (InterPro:IPR001509), NAD(P)-…
Bin: 9.1.2	mitochondrial electron transport / ATP synthesis.NADH-DH.localisation not clear
	Id: seq_1811
	(q43644|ndus1_soltu : 216.0) NADH-ubiquinone oxidoreductase 75 kDa subunit, mitochondrial precursor (EC 1.6.5.3) (EC 1.6.99.3) (Complex I-75kD) (CI-75kD) (76 kDa mitochondrial complex I subunit) - Solanum tuberosum (Potato) & (at5g37510 : 212.0) Encodes a subunit of the 400 kDa subcomplex of the mitochondrial NADH dehydrogenase (complex I). The protein has been isolated in the male gametophyte.; …
Bin: 9.1.2	mitochondrial electron transport / ATP synthesis.NADH-DH.localisation not clear
	Id: seq_1854
	(q43644|ndus1_soltu : 249.0) NADH-ubiquinone oxidoreductase 75 kDa subunit, mitochondrial precursor (EC 1.6.5.3) (EC 1.6.99.3) (Complex I-75kD) (CI-75kD) (76 kDa mitochondrial complex I subunit) - Solanum tuberosum (Potato) & (at5g37510 : 227.0) Encodes a subunit of the 400 kDa subcomplex of the mitochondrial NADH dehydrogenase (complex I). The protein has been isolated in the male gametophyte.; …
Bin: 9.1.2	mitochondrial electron transport / ATP synthesis.NADH-DH.localisation not clear
	Id: seq_1925
	(atmg00510 : 145.0) NADH dehydrogenase subunit 7; NADH dehydrogenase subunit 7 (NAD7); FUNCTIONS IN: NADH dehydrogenase activity; INVOLVED IN: oxidation reduction, cellular respiration; LOCATED IN: mitochondrion, mitochondrial respiratory chain complex I, respiratory chain complex I, membrane; EXPRESSED IN: leaf whorl, guard cell, cultured cell, seed, leaf; EXPRESSED DURING: E expanded cotyledon …
Bin: 9.1.2	mitochondrial electron transport / ATP synthesis.NADH-DH.localisation not clear
	Id: seq_1929
	(q43644|ndus1_soltu : 298.0) NADH-ubiquinone oxidoreductase 75 kDa subunit, mitochondrial precursor (EC 1.6.5.3) (EC 1.6.99.3) (Complex I-75kD) (CI-75kD) (76 kDa mitochondrial complex I subunit) - Solanum tuberosum (Potato) & (at5g37510 : 279.0) Encodes a subunit of the 400 kDa subcomplex of the mitochondrial NADH dehydrogenase (complex I). The protein has been isolated in the male gametophyte.; …
Bin: 9.1.2	mitochondrial electron transport / ATP synthesis.NADH-DH.localisation not clear
	Id: seq_1995
	(q43644|ndus1_soltu : 110.0) NADH-ubiquinone oxidoreductase 75 kDa subunit, mitochondrial precursor (EC 1.6.5.3) (EC 1.6.99.3) (Complex I-75kD) (CI-75kD) (76 kDa mitochondrial complex I subunit) - Solanum tuberosum (Potato) & (at5g37510 : 108.0) Encodes a subunit of the 400 kDa subcomplex of the mitochondrial NADH dehydrogenase (complex I). The protein has been isolated in the male gametophyte.; …
Bin: 9.1.2	mitochondrial electron transport / ATP synthesis.NADH-DH.localisation not clear
	Id: seq_2141
	(at2g20360 : 110.0) NAD(P)-binding Rossmann-fold superfamily protein; FUNCTIONS IN: coenzyme binding, binding, catalytic activity; INVOLVED IN: response to salt stress; LOCATED IN: mitochondrion, respiratory chain complex I, membrane; EXPRESSED IN: 27 plant structures; EXPRESSED DURING: 16 growth stages; CONTAINS InterPro DOMAIN/s: NAD-dependent epimerase/dehydratase (InterPro:IPR001509), NAD(P)-…
Bin: 9.1.1.5	mitochondrial electron transport / ATP synthesis.NADH-DH.complex I.carbonic anhydrase
	Id: seq_64
	(at1g19580 : 482.0) Encodes mitochondrial gamma carbonic anhydrase. Component of the NADH dehydrogenase complex.; gamma carbonic anhydrase 1 (GAMMA CA1); CONTAINS InterPro DOMAIN/s: Trimeric LpxA-like (InterPro:IPR011004); BEST Arabidopsis thaliana protein match is: gamma carbonic anhydrase 3 (TAIR:AT5G66510.1). & (gnl|cdd|31007 : 201.0) no description available & (reliability: 964.0) & (original…
Bin: 9.1.1.5	mitochondrial electron transport / ATP synthesis.NADH-DH.complex I.carbonic anhydrase
	Id: seq_345
	(at3g48680 : 255.0) Encodes a mitochondrial gamma carbonic anhydrase-like protein. Component of the NADH dehydrogenase complex.; gamma carbonic anhydrase-like 2 (GAMMA CAL2); FUNCTIONS IN: transferase activity; INVOLVED IN: photorespiration; LOCATED IN: in 6 components; EXPRESSED IN: 25 plant structures; EXPRESSED DURING: 15 growth stages; CONTAINS InterPro DOMAIN/s: Trimeric LpxA-like (InterPro:…
Bin: 9.1.1.5	mitochondrial electron transport / ATP synthesis.NADH-DH.complex I.carbonic anhydrase
	Id: seq_654
	(at1g19580 : 476.0) Encodes mitochondrial gamma carbonic anhydrase. Component of the NADH dehydrogenase complex.; gamma carbonic anhydrase 1 (GAMMA CA1); CONTAINS InterPro DOMAIN/s: Trimeric LpxA-like (InterPro:IPR011004); BEST Arabidopsis thaliana protein match is: gamma carbonic anhydrase 3 (TAIR:AT5G66510.1). & (gnl|cdd|31007 : 206.0) no description available & (reliability: 952.0) & (original…
Bin: 9.1.1	mitochondrial electron transport / ATP synthesis.NADH-DH.complex I
	Id: seq_700
	(gnl|cdd|38300 : 463.0) no description available & (at4g28510 : 399.0) prohibitin 1 (Atphb1); prohibitin 1 (PHB1); INVOLVED IN: response to stress; LOCATED IN: mitochondrion, plasma membrane, respiratory chain complex I; EXPRESSED IN: 10 plant structures; CONTAINS InterPro DOMAIN/s: Prohibitin (InterPro:IPR000163), Band 7 protein (InterPro:IPR001107); BEST Arabidopsis thaliana protein match is: p…
Bin: 9.1.1	mitochondrial electron transport / ATP synthesis.NADH-DH.complex I
	Id: seq_852
	(at3g12260 : 182.0) LYR family of Fe/S cluster biogenesis protein; FUNCTIONS IN: catalytic activity; LOCATED IN: mitochondrion, respiratory chain complex I, membrane; EXPRESSED IN: 23 plant structures; EXPRESSED DURING: 14 growth stages; Has 252 Blast hits to 252 proteins in 114 species: Archae - 0; Bacteria - 0; Metazoa - 119; Fungi - 50; Plants - 50; Viruses - 0; Other Eukaryotes - 33 (source: …
Bin: 9.1.1	mitochondrial electron transport / ATP synthesis.NADH-DH.complex I
	Id: seq_1069
	(gnl|cdd|38300 : 434.0) no description available & (at2g20530 : 403.0) prohibitin 6 (PHB6); INVOLVED IN: biological_process unknown; LOCATED IN: mitochondrion, plasma membrane, mitochondrial respiratory chain complex I, respiratory chain complex I, membrane; EXPRESSED IN: 11 plant structures; EXPRESSED DURING: M germinated pollen stage; CONTAINS InterPro DOMAIN/s: Prohibitin (InterPro:IPR000163),…
Bin: 9	mitochondrial electron transport / ATP synthesis
	Id: seq_444
	(at4g34700 : 165.0) LYR family of Fe/S cluster biogenesis protein; FUNCTIONS IN: catalytic activity; INVOLVED IN: photorespiration; LOCATED IN: mitochondrial membrane, plasma membrane, respiratory chain complex I; EXPRESSED IN: 25 plant structures; EXPRESSED DURING: 15 growth stages; Has 30201 Blast hits to 17322 proteins in 780 species: Archae - 12; Bacteria - 1396; Metazoa - 17338; Fungi - 3422…
10. cell wall
Bin: 10.8.1	cell wall.pectin*esterases.PME
	Id: seq_423
	(at5g09760 : 710.0) Plant invertase/pectin methylesterase inhibitor superfamily; FUNCTIONS IN: enzyme inhibitor activity, pectinesterase activity; INVOLVED IN: cell wall modification; LOCATED IN: cell wall, chloroplast, plant-type cell wall; EXPRESSED IN: 23 plant structures; EXPRESSED DURING: 13 growth stages; CONTAINS InterPro DOMAIN/s: Pectin lyase fold/virulence factor (InterPro:IPR011050), P…
Bin: 10.8.1	cell wall.pectin*esterases.PME
	Id: seq_1598
	(q43111|pme3_phavu : 326.0) Pectinesterase-3 precursor (EC 3.1.1.11) (Pectin methylesterase 3) (PE 3) - Phaseolus vulgaris (Kidney bean) (French bean) & (gnl|cdd|85238 : 286.0) no description available & (at1g53840 : 282.0) encodes a pectin methylesterase; pectin methylesterase 1 (PME1); FUNCTIONS IN: pectinesterase activity; INVOLVED IN: cell wall modification; LOCATED IN: extracellular region, …
Bin: 10.7	cell wall.modification
	Id: seq_57
	(gnl|cdd|29536 : 139.0) no description available & (ipr013320 : 115.99676) Concanavalin A-like lectin/glucanase, subgroup & (at2g01850 : 107.0) EXGT-A3 has homology to xyloglucan endotransglucosylases/hydrolases (XTHs). Mutants in this gene show a lesion mimic phenotype associated with leaf maturation and a reduction in the number of tertiary veins. Individual tracheary elements in the mutants ar…
Bin: 10.6.3	cell wall.degradation.pectate lyases and polygalacturonases
	Id: seq_191
	(at3g61490 : 739.0) Pectin lyase-like superfamily protein; FUNCTIONS IN: polygalacturonase activity; INVOLVED IN: carbohydrate metabolic process; LOCATED IN: endomembrane system; EXPRESSED IN: 22 plant structures; EXPRESSED DURING: 14 growth stages; CONTAINS InterPro DOMAIN/s: Pectin lyase fold/virulence factor (InterPro:IPR011050), Glycoside hydrolase, family 28 (InterPro:IPR000743), Pectin lyas…
Bin: 10.6.3	cell wall.degradation.pectate lyases and polygalacturonases
	Id: seq_578
	(at4g23500 : 734.0) Pectin lyase-like superfamily protein; FUNCTIONS IN: polygalacturonase activity; INVOLVED IN: carbohydrate metabolic process; LOCATED IN: cell wall; CONTAINS InterPro DOMAIN/s: Pectin lyase fold/virulence factor (InterPro:IPR011050), Glycoside hydrolase, family 28 (InterPro:IPR000743), Pectin lyase fold (InterPro:IPR012334), Parallel beta-helix repeat (InterPro:IPR006626); BES…
Bin: 10.6.3	cell wall.degradation.pectate lyases and polygalacturonases
	Id: seq_1256
	(at3g62110 : 577.0) Pectin lyase-like superfamily protein; FUNCTIONS IN: polygalacturonase activity; INVOLVED IN: response to cyclopentenone, carbohydrate metabolic process; LOCATED IN: vacuole; EXPRESSED IN: 25 plant structures; EXPRESSED DURING: 15 growth stages; CONTAINS InterPro DOMAIN/s: Pectin lyase fold/virulence factor (InterPro:IPR011050), Glycoside hydrolase, family 28 (InterPro:IPR0007…
Bin: 10.6.3	cell wall.degradation.pectate lyases and polygalacturonases
	Id: seq_1768
	(at1g70370 : 320.0) polygalacturonase 2 (PG2); FUNCTIONS IN: polygalacturonase activity; INVOLVED IN: biological_process unknown; LOCATED IN: endomembrane system; EXPRESSED IN: 23 plant structures; EXPRESSED DURING: 13 growth stages; CONTAINS InterPro DOMAIN/s: BURP (InterPro:IPR004873); BEST Arabidopsis thaliana protein match is: BURP domain-containing protein (TAIR:AT1G23760.1). & (gnl|cdd|6683…
Bin: 10.6.2	cell wall.degradation.mannan-xylose-arabinose-fucose
	Id: seq_57
	(gnl|cdd|29536 : 139.0) no description available & (ipr013320 : 115.99676) Concanavalin A-like lectin/glucanase, subgroup & (at2g01850 : 107.0) EXGT-A3 has homology to xyloglucan endotransglucosylases/hydrolases (XTHs). Mutants in this gene show a lesion mimic phenotype associated with leaf maturation and a reduction in the number of tertiary veins. Individual tracheary elements in the mutants ar…
Bin: 10.6.2	cell wall.degradation.mannan-xylose-arabinose-fucose
	Id: seq_696
	(at3g10740 : 991.0) Encodes a bifunctional alpha-l-arabinofuranosidase/beta-d-xylosidase that belongs to family 51 of glycoside hydrolases. It may be involved in cell wall modification.; alpha-L-arabinofuranosidase 1 (ASD1); FUNCTIONS IN: hydrolase activity, acting on glycosyl bonds, xylan 1,4-beta-xylosidase activity, alpha-N-arabinofuranosidase activity; INVOLVED IN: xylan catabolic process; LO…
Bin: 10.6.1	cell wall.degradation.cellulases and beta -1,4-glucanases
	Id: seq_1111
	(at5g20950 : 972.0) Glycosyl hydrolase family protein; FUNCTIONS IN: hydrolase activity, hydrolyzing O-glycosyl compounds; INVOLVED IN: carbohydrate metabolic process; LOCATED IN: cell wall, membrane, plant-type cell wall; EXPRESSED IN: 25 plant structures; EXPRESSED DURING: 13 growth stages; CONTAINS InterPro DOMAIN/s: Glycoside hydrolase, family 3, N-terminal (InterPro:IPR001764), Glycoside hyd…
Bin: 10.6.1	cell wall.degradation.cellulases and beta -1,4-glucanases
	Id: seq_1308
	(at3g47000 : 944.0) Glycosyl hydrolase family protein; FUNCTIONS IN: hydrolase activity, hydrolyzing O-glycosyl compounds; INVOLVED IN: carbohydrate metabolic process; LOCATED IN: cellular_component unknown; EXPRESSED IN: 23 plant structures; EXPRESSED DURING: 13 growth stages; CONTAINS InterPro DOMAIN/s: Glycoside hydrolase, family 3, N-terminal (InterPro:IPR001764), Glycoside hydrolase, family …
Bin: 10.6.1	cell wall.degradation.cellulases and beta -1,4-glucanases
	Id: seq_1406
	(at5g04885 : 963.0) Glycosyl hydrolase family protein; FUNCTIONS IN: hydrolase activity, hydrolyzing O-glycosyl compounds; INVOLVED IN: carbohydrate metabolic process; LOCATED IN: plasma membrane, anchored to membrane; EXPRESSED IN: 7 plant structures; CONTAINS InterPro DOMAIN/s: Glycoside hydrolase, family 3, N-terminal (InterPro:IPR001764), Glycoside hydrolase, family 3, C-terminal (InterPro:IP…
Bin: 10.5.5	cell wall.cell wall proteins.RGP
	Id: seq_755
	(q8ru27|uptg2_soltu : 701.0) Alpha-1,4-glucan-protein synthase [UDP-forming] 2 (EC 2.4.1.112) (UDP-glucose:protein transglucosylase 2) (UPTG 2) - Solanum tuberosum (Potato) & (at3g08900 : 667.0) Encodes a reversible autoglycosylated protein peripherally associated with cell membranes. Highly expressed in roots ans suspension-cultured cells.; reversibly glycosylated polypeptide 3 (RGP3); FUNCTIONS…
Bin: 10.5.5	cell wall.cell wall proteins.RGP
	Id: seq_1063
	(q8ru27|uptg2_soltu : 709.0) Alpha-1,4-glucan-protein synthase [UDP-forming] 2 (EC 2.4.1.112) (UDP-glucose:protein transglucosylase 2) (UPTG 2) - Solanum tuberosum (Potato) & (at3g08900 : 678.0) Encodes a reversible autoglycosylated protein peripherally associated with cell membranes. Highly expressed in roots ans suspension-cultured cells.; reversibly glycosylated polypeptide 3 (RGP3); FUNCTIONS…
Bin: 10.5.4	cell wall.cell wall proteins.HRGP
	Id: seq_441
	(at4g28300 : 303.0) Encodes a protein with 13.6% proline amino acids that is predicted to localize to the cell wall.; Protein of unknown function (DUF1421); CONTAINS InterPro DOMAIN/s: Protein of unknown function DUF1421 (InterPro:IPR010820); BEST Arabidopsis thaliana protein match is: Protein of unknown function (DUF1421) (TAIR:AT5G14540.1); Has 35333 Blast hits to 34131 proteins in 2444 species…
Bin: 10.5.3	cell wall.cell wall proteins.LRR
	Id: seq_710
	(at3g19320 : 320.0) Leucine-rich repeat (LRR) family protein; LOCATED IN: endomembrane system; EXPRESSED IN: root; CONTAINS InterPro DOMAIN/s: Leucine-rich repeat (InterPro:IPR001611); BEST Arabidopsis thaliana protein match is: Leucine-rich repeat (LRR) family protein (TAIR:AT1G49750.1); Has 128497 Blast hits to 47794 proteins in 2067 species: Archae - 184; Bacteria - 14728; Metazoa - 28641; Fun…
Bin: 10.5.1.1	cell wall.cell wall proteins.AGPs.AGP
	Id: seq_529
	(at2g45470 : 387.0) FASCICLIN-like arabinogalactan protein 8 (FLA8); LOCATED IN: anchored to plasma membrane, apoplast, plasma membrane, anchored to membrane, plant-type cell wall; EXPRESSED IN: 24 plant structures; EXPRESSED DURING: 14 growth stages; CONTAINS InterPro DOMAIN/s: FAS1 domain (InterPro:IPR000782); BEST Arabidopsis thaliana protein match is: FASCICLIN-like arabinogalactan-protein 10…
Bin: 10.5.1.1	cell wall.cell wall proteins.AGPs.AGP
	Id: seq_1556
	(at5g55730 : 264.0) fasciclin-like arabinogalactan-protein 1 (Fla1); FASCICLIN-like arabinogalactan 1 (FLA1); CONTAINS InterPro DOMAIN/s: FAS1 domain (InterPro:IPR000782); BEST Arabidopsis thaliana protein match is: FASCICLIN-like arabinogalactan 2 (TAIR:AT4G12730.1). & (reliability: 528.0) & (original description: no original description)
Bin: 10.1.21	cell wall.precursor synthesis.phosphomannomutase
	Id: seq_838
	(at2g45790 : 427.0) encodes a phosphomannomutase, involved in ascorbate biosynthesis; phosphomannomutase (PMM); FUNCTIONS IN: protein binding, phosphomannomutase activity; INVOLVED IN: L-ascorbic acid biosynthetic process, response to salt stress, mannose biosynthetic process; LOCATED IN: cytoplasm; EXPRESSED IN: 24 plant structures; EXPRESSED DURING: 13 growth stages; CONTAINS InterPro DOMAIN/s:…
Bin: 10.1.12.2	cell wall.precursor synthesis.KDO pathway.KDO-8-Phosphate Synthase
	Id: seq_2231
	(o50044|kdsa_pea : 226.0) 2-dehydro-3-deoxyphosphooctonate aldolase (EC 2.5.1.55) (Phospho-2-dehydro-3-deoxyoctonate aldolase) (3-deoxy-D-manno-octulosonic acid 8-phosphate synthetase) (KDO-8-phosphate synthetase) (KDO 8-P synthase) (KDOPS) - Pisum sativum (Garden & (at1g79500 : 224.0) Encodes a protein with 3-deoxy-8-phosphooctulonate synthase (KDOP synthase) activity which is involved in the bi…
Bin: 10.1.10	cell wall.precursor synthesis.RHM
	Id: seq_784
	(at1g78570 : 1235.0) Encodes a UDP-L-Rhamnose synthase involved in the biosynthesis of rhamnose, a major monosaccharide component of pectin. Catalyzes the conversion of UDP-D-Glc to UDP-L-Rha. The dehydrogenase domain of RHM1 was shown to catalyze the conversion of UDP-D-Glc to the reaction intermediate UDP-4-keto-6-deoxy-D-Glc using recombinant protein assay but the activity of the full-length p…
Bin: 10.1.5	cell wall.precursor synthesis.UXS
	Id: seq_284
	(at3g46440 : 627.0) encodes a protein similar to UDP-glucuronic acid decarboxylase. UDP-glucuronic acid decarboxylase produces UDP-xylose, which is a substrate for many cell wall carbohydrates including hemicellulose and pectin. UDP-xylose is also known to feedback regulate several cell wall biosynthetic enzymes.; UDP-XYL synthase 5 (UXS5); FUNCTIONS IN: UDP-glucuronate decarboxylase activity, ca…
Bin: 10.1.5	cell wall.precursor synthesis.UXS
	Id: seq_833
	(at2g28760 : 116.0) UDP-XYL synthase 6 (UXS6); FUNCTIONS IN: coenzyme binding, binding, catalytic activity; INVOLVED IN: cellular metabolic process, nucleotide-sugar metabolic process, metabolic process; LOCATED IN: plasma membrane; EXPRESSED IN: 24 plant structures; EXPRESSED DURING: 13 growth stages; CONTAINS InterPro DOMAIN/s: NAD-dependent epimerase/dehydratase (InterPro:IPR001509), NAD(P)-bi…
Bin: 10.1.5	cell wall.precursor synthesis.UXS
	Id: seq_1740
	(at2g28760 : 224.0) UDP-XYL synthase 6 (UXS6); FUNCTIONS IN: coenzyme binding, binding, catalytic activity; INVOLVED IN: cellular metabolic process, nucleotide-sugar metabolic process, metabolic process; LOCATED IN: plasma membrane; EXPRESSED IN: 24 plant structures; EXPRESSED DURING: 13 growth stages; CONTAINS InterPro DOMAIN/s: NAD-dependent epimerase/dehydratase (InterPro:IPR001509), NAD(P)-bi…
Bin: 10.1.4	cell wall.precursor synthesis.UDP-Glc dehydrogenase (UGD)
	Id: seq_436
	(gnl|cdd|37877 : 920.0) no description available & (q96558|ugdh_soybn : 911.0) UDP-glucose 6-dehydrogenase (EC 1.1.1.22) (UDP-Glc dehydrogenase) (UDP-GlcDH) (UDPGDH) - Glycine max (Soybean) & (at3g29360 : 900.0) UDP-glucose 6-dehydrogenase family protein; FUNCTIONS IN: in 6 functions; INVOLVED IN: oxidation reduction, metabolic process; LOCATED IN: cytosol, nucleus; EXPRESSED IN: 25 plant structu…
Bin: 10.1.4	cell wall.precursor synthesis.UDP-Glc dehydrogenase (UGD)
	Id: seq_1530
	(at5g15490 : 209.0) UDP-glucose 6-dehydrogenase family protein; FUNCTIONS IN: in 7 functions; INVOLVED IN: oxidation reduction, metabolic process; LOCATED IN: cytosol, cell wall, nucleus; EXPRESSED IN: 24 plant structures; EXPRESSED DURING: 13 growth stages; CONTAINS InterPro DOMAIN/s: UDP-glucose/GDP-mannose dehydrogenase, N-terminal (InterPro:IPR001732), 6-phosphogluconate dehydrogenase, C-term…
Bin: 10.1.3	cell wall.precursor synthesis.AXS
	Id: seq_325
	(at1g08200 : 730.0) Encodes a putative UDP-D-apiose/UPD-D-xylose synthetase.; UDP-D-apiose/UDP-D-xylose synthase 2 (AXS2); FUNCTIONS IN: UDP-glucuronate decarboxylase activity; INVOLVED IN: nucleotide-sugar biosynthetic process; LOCATED IN: apoplast, cytoplasm; EXPRESSED IN: fruit, guard cell, cultured cell, leaf; EXPRESSED DURING: seedling growth; CONTAINS InterPro DOMAIN/s: NAD-dependent epimer…
Bin: 10.1.2	cell wall.precursor synthesis.UGE
	Id: seq_1432
	(at4g10960 : 617.0) Encodes a protein with UDP-D-glucose 4-epimerase activity.; UDP-D-glucose/UDP-D-galactose 4-epimerase 5 (UGE5); FUNCTIONS IN: UDP-glucose 4-epimerase activity, protein dimerization activity; INVOLVED IN: response to stress; LOCATED IN: endomembrane system; EXPRESSED IN: male gametophyte, root, guard cell, leaf, pollen tube; EXPRESSED DURING: L mature pollen stage, M germinated…
Bin: 10.1.1.20	cell wall.precursor synthesis.NDP sugar pyrophosphorylase.multiple NDP-Sugars
	Id: seq_1746
	(at5g52560 : 548.0) Encodes a protein with UTP:sugar 1-phosphate uridylyltransferase activity, which has been shown to use a wide range of substrates including glucose-1-P, galactose-1-P, xylose-1-P, arabinose-1-P and glucuronate-1-P. The enzyme was shown to require Mg2+ or Mn2+ for activity. Mutations in USP can lead to a complete loss of male fertility.; UDP-sugar pyrophosphorylase (USP); FUNCT…
Bin: 10.1.1.20	cell wall.precursor synthesis.NDP sugar pyrophosphorylase.multiple NDP-Sugars
	Id: seq_1905
	(at5g52560 : 393.0) Encodes a protein with UTP:sugar 1-phosphate uridylyltransferase activity, which has been shown to use a wide range of substrates including glucose-1-P, galactose-1-P, xylose-1-P, arabinose-1-P and glucuronate-1-P. The enzyme was shown to require Mg2+ or Mn2+ for activity. Mutations in USP can lead to a complete loss of male fertility.; UDP-sugar pyrophosphorylase (USP); FUNCT…
Bin: 10.1.1.1	cell wall.precursor synthesis.NDP sugar pyrophosphorylase.GDP mannose
	Id: seq_59
	(at2g39770 : 681.0) Encodes a GDP-mannose pyrophosphorylase/ mannose-1-pyrophosphatase. This enzyme provides GDP-mannose, which is used for cell wall carbohydrate biosynthesis and protein glycosylation as well as for ascorbate (vitamin C) biosynthesis. Mutations in this gene confer hypersensitivity to NH4+.; CYTOKINESIS DEFECTIVE 1 (CYT1); CONTAINS InterPro DOMAIN/s: Trimeric LpxA-like (InterPro:…
11. lipid metabolism
Bin: 11.10.3	lipid metabolism.glycolipid synthesis.UDP-sulfoquinovose synthase
	Id: seq_1000
	(q84ki6|sqd1_spiol : 774.0) UDP-sulfoquinovose synthase, chloroplast precursor (EC 3.13.1.1) (Sulfite:UDP-glucose sulfotransferase) (Sulfolipid biosynthesis protein) (SoSQD1) - Spinacia oleracea (Spinach) & (at4g33030 : 748.0) involved in sulfolipid biosynthesis; sulfoquinovosyldiacylglycerol 1 (SQD1); FUNCTIONS IN: UDPsulfoquinovose synthase activity, sulfotransferase activity, zinc ion binding;…
Bin: 11.9.4.9	lipid metabolism.lipid degradation.beta-oxidation.multifunctional
	Id: seq_159
	(q39659|mfpa_cucsa : 1170.0) Glyoxysomal fatty acid beta-oxidation multifunctional protein MFP-a [Includes: Enoyl-CoA hydratase (EC 4.2.1.17); 3-2-trans-enoyl-CoA isomerase (EC 5.3.3.8); 3-hydroxybutyryl-CoA epimerase (EC 5.1.2.3); 3-hydroxyacyl-CoA dehydrogenase ( & (at3g06860 : 1144.0) Encodes a multifunctional protein. Involved in peroxisomal fatty acid beta oxidation. Loss-of-function mutant …
Bin: 11.9.4.9	lipid metabolism.lipid degradation.beta-oxidation.multifunctional
	Id: seq_258
	(at4g29010 : 984.0) Functions in beta-oxidation of fatty acids, similar to CuMFP with L-3-hydroxyacyl-CoA hydrolyase , L-3-hydroxyacyl-dehydrogenase, D-3-hydroxyacyl-CoA epimerase, and 3, 2-enoyl-CoA isomerase activities; ABNORMAL INFLORESCENCE MERISTEM (AIM1); FUNCTIONS IN: enoyl-CoA hydratase activity; INVOLVED IN: multicellular organismal development, flower development, fatty acid beta-oxidat…
Bin: 11.9.4.5	lipid metabolism.lipid degradation.beta-oxidation.acyl-CoA thioesterase
	Id: seq_728
	(gnl|cdd|36728 : 252.0) no description available & (at1g19190 : 240.0) alpha/beta-Hydrolases superfamily protein; FUNCTIONS IN: hydrolase activity; INVOLVED IN: metabolic process; LOCATED IN: cellular_component unknown; EXPRESSED IN: inflorescence meristem, root, flower; EXPRESSED DURING: petal differentiation and expansion stage; CONTAINS InterPro DOMAIN/s: Lipase, GDXG, active site (InterPro:IP…
Bin: 11.9.4.5	lipid metabolism.lipid degradation.beta-oxidation.acyl-CoA thioesterase
	Id: seq_735
	(at2g03550 : 315.0) alpha/beta-Hydrolases superfamily protein; FUNCTIONS IN: hydrolase activity; INVOLVED IN: metabolic process; LOCATED IN: cellular_component unknown; EXPRESSED IN: 21 plant structures; EXPRESSED DURING: 13 growth stages; CONTAINS InterPro DOMAIN/s: Alpha/beta hydrolase fold-3 (InterPro:IPR013094); BEST Arabidopsis thaliana protein match is: carboxyesterase 13 (TAIR:AT3G48700.1)…
Bin: 11.9.4.5	lipid metabolism.lipid degradation.beta-oxidation.acyl-CoA thioesterase
	Id: seq_1417
	(gnl|cdd|36728 : 248.0) no description available & (at1g49650 : 224.0) alpha/beta-Hydrolases superfamily protein; FUNCTIONS IN: hydrolase activity; INVOLVED IN: metabolic process; EXPRESSED IN: 15 plant structures; EXPRESSED DURING: 10 growth stages; CONTAINS InterPro DOMAIN/s: Alpha/beta hydrolase fold-3 (InterPro:IPR013094); BEST Arabidopsis thaliana protein match is: carboxyesterase 5 (TAIR:AT…
Bin: 11.9.4.4	lipid metabolism.lipid degradation.beta-oxidation.hydroxybutyryl CoA DH
	Id: seq_97
	(at4g16210 : 397.0) enoyl-CoA hydratase/isomerase A (ECHIA); FUNCTIONS IN: catalytic activity; INVOLVED IN: metabolic process; LOCATED IN: peroxisome; EXPRESSED IN: 22 plant structures; EXPRESSED DURING: 13 growth stages; CONTAINS InterPro DOMAIN/s: Crotonase, core (InterPro:IPR001753); BEST Arabidopsis thaliana protein match is: enoyl-CoA hydratase/isomerase D (TAIR:AT1G60550.1); Has 36619 Blast…
Bin: 11.9.4.3	lipid metabolism.lipid degradation.beta-oxidation.enoyl CoA hydratase
	Id: seq_793
	(at4g13360 : 528.0) ATP-dependent caseinolytic (Clp) protease/crotonase family protein; FUNCTIONS IN: catalytic activity; INVOLVED IN: metabolic process; EXPRESSED IN: 24 plant structures; EXPRESSED DURING: 14 growth stages; CONTAINS InterPro DOMAIN/s: Crotonase, core (InterPro:IPR001753); BEST Arabidopsis thaliana protein match is: ATP-dependent caseinolytic (Clp) protease/crotonase family prote…
Bin: 11.9.4.2	lipid metabolism.lipid degradation.beta-oxidation.acyl CoA DH
	Id: seq_554
	(at4g16760 : 1028.0) Encodes a medium to long-chain acyl-CoA oxidase. Catalyzes the first step of fatty acid beta-oxidation. Involved in jasmonate biosynthesis. Gene expression is induced by wounding, drought stress, abscisic acid, and jasmonate.; acyl-CoA oxidase 1 (ACX1); CONTAINS InterPro DOMAIN/s: Acyl-CoA oxidase/dehydrogenase, type1/2, C-terminal (InterPro:IPR013764), Acyl-CoA dehydrogenase…
Bin: 11.9.3.3	lipid metabolism.lipid degradation.lysophospholipases.glycerophosphodiester phosphodiesterase
	Id: seq_1151
	(at1g74210 : 549.0) PLC-like phosphodiesterases superfamily protein; FUNCTIONS IN: phosphoric diester hydrolase activity, glycerophosphodiester phosphodiesterase activity; INVOLVED IN: glycerol metabolic process, lipid metabolic process; LOCATED IN: vacuole; EXPRESSED IN: 24 plant structures; EXPRESSED DURING: 15 growth stages; CONTAINS InterPro DOMAIN/s: PLC-like phosphodiesterase, TIM beta/alph…
Bin: 11.9.3.2	lipid metabolism.lipid degradation.lysophospholipases.carboxylesterase
	Id: seq_728
	(gnl|cdd|36728 : 252.0) no description available & (at1g19190 : 240.0) alpha/beta-Hydrolases superfamily protein; FUNCTIONS IN: hydrolase activity; INVOLVED IN: metabolic process; LOCATED IN: cellular_component unknown; EXPRESSED IN: inflorescence meristem, root, flower; EXPRESSED DURING: petal differentiation and expansion stage; CONTAINS InterPro DOMAIN/s: Lipase, GDXG, active site (InterPro:IP…
Bin: 11.9.3.2	lipid metabolism.lipid degradation.lysophospholipases.carboxylesterase
	Id: seq_735
	(at2g03550 : 315.0) alpha/beta-Hydrolases superfamily protein; FUNCTIONS IN: hydrolase activity; INVOLVED IN: metabolic process; LOCATED IN: cellular_component unknown; EXPRESSED IN: 21 plant structures; EXPRESSED DURING: 13 growth stages; CONTAINS InterPro DOMAIN/s: Alpha/beta hydrolase fold-3 (InterPro:IPR013094); BEST Arabidopsis thaliana protein match is: carboxyesterase 13 (TAIR:AT3G48700.1)…
Bin: 11.9.3.2	lipid metabolism.lipid degradation.lysophospholipases.carboxylesterase
	Id: seq_887
	(at5g20060 : 373.0) alpha/beta-Hydrolases superfamily protein; FUNCTIONS IN: hydrolase activity, carboxylesterase activity; INVOLVED IN: biological_process unknown; LOCATED IN: cellular_component unknown; EXPRESSED IN: 23 plant structures; EXPRESSED DURING: 15 growth stages; CONTAINS InterPro DOMAIN/s: Phospholipase/carboxylesterase (InterPro:IPR003140); BEST Arabidopsis thaliana protein match is…
Bin: 11.9.3.2	lipid metabolism.lipid degradation.lysophospholipases.carboxylesterase
	Id: seq_1417
	(gnl|cdd|36728 : 248.0) no description available & (at1g49650 : 224.0) alpha/beta-Hydrolases superfamily protein; FUNCTIONS IN: hydrolase activity; INVOLVED IN: metabolic process; EXPRESSED IN: 15 plant structures; EXPRESSED DURING: 10 growth stages; CONTAINS InterPro DOMAIN/s: Alpha/beta hydrolase fold-3 (InterPro:IPR013094); BEST Arabidopsis thaliana protein match is: carboxyesterase 5 (TAIR:AT…
Bin: 11.9.3.1	lipid metabolism.lipid degradation.lysophospholipases.phospholipase D
	Id: seq_1147
	(q41142|plda1_ricco : 1494.0) Phospholipase D alpha 1 precursor (EC 3.1.4.4) (PLD 1) (Choline phosphatase 1) (Phosphatidylcholine-hydrolyzing phospholipase D 1) - Ricinus communis (Castor bean) & (at3g15730 : 1409.0) Encodes phospholipase D alpha 1 (PLD alpha 1). Positive regulator of abscisic acid (ABA) mediated stomatal movements. PLD alpha 1 plays an important role in seed deterioration and ag…
Bin: 11.9.2	lipid metabolism.lipid degradation.lipases
	Id: seq_1763
	(at1g31550 : 221.0) GDSL-like Lipase/Acylhydrolase superfamily protein; FUNCTIONS IN: lipase activity, hydrolase activity, acting on ester bonds, carboxylesterase activity; INVOLVED IN: lipid metabolic process; LOCATED IN: vacuole; EXPRESSED IN: 20 plant structures; EXPRESSED DURING: 13 growth stages; CONTAINS InterPro DOMAIN/s: Lipase, GDSL (InterPro:IPR001087); BEST Arabidopsis thaliana protein…
Bin: 11.8.7	lipid metabolism.'exotics' (steroids, squalene etc).trans-2-enoyl-CoA reductase (NADPH)
	Id: seq_2195
	(at3g55360 : 140.0) Enoyl-CoA reductase is involved in all very long chain fatty acids (VLCFA) elongation reactions that are required for cuticular wax, storage lipid and sphingolipid metabolism. The protein is located in the ER, but in contrast to its yeast homolog TSC13 is not particularly enriched in the nuclear envelope-vacuole junction. Mutants in this gene show abnormal organ morphology and…
Bin: 11.8.3	lipid metabolism.'exotics' (steroids, squalene etc).UDP-glucose:sterol glucosyltransferase
	Id: seq_481
	(at3g07020 : 824.0) UDP-Glycosyltransferase superfamily protein; FUNCTIONS IN: transferase activity, transferring glycosyl groups; INVOLVED IN: lipid glycosylation, carbohydrate metabolic process, metabolic process; LOCATED IN: plasma membrane, membrane; EXPRESSED IN: 25 plant structures; EXPRESSED DURING: 15 growth stages; CONTAINS InterPro DOMAIN/s: Glycosyl transferase, family 28 (InterPro:IPR…
Bin: 11.8.1.1	lipid metabolism.'exotics' (steroids, squalene etc).sphingolipids.ceramidase
	Id: seq_75
	(at1g07380 : 1176.0) Neutral/alkaline non-lysosomal ceramidase; FUNCTIONS IN: ceramidase activity; INVOLVED IN: biological_process unknown; LOCATED IN: plasma membrane; EXPRESSED IN: 23 plant structures; EXPRESSED DURING: 13 growth stages; CONTAINS InterPro DOMAIN/s: Neutral/alkaline nonlysosomal ceramidase (InterPro:IPR006823); BEST Arabidopsis thaliana protein match is: Neutral/alkaline non-lys…
Bin: 11.8.1.1	lipid metabolism.'exotics' (steroids, squalene etc).sphingolipids.ceramidase
	Id: seq_1650
	(gnl|cdd|37443 : 229.0) no description available & (gnl|cdd|68312 : 210.0) no description available & (at2g38010 : 205.0) Neutral/alkaline non-lysosomal ceramidase; FUNCTIONS IN: ceramidase activity; LOCATED IN: endomembrane system; EXPRESSED IN: 22 plant structures; EXPRESSED DURING: 13 growth stages; CONTAINS InterPro DOMAIN/s: Neutral/alkaline nonlysosomal ceramidase (InterPro:IPR006823); BEST…
Bin: 11.8	lipid metabolism.'exotics'(steroids, squalene etc)
	Id: seq_421
	(at4g27270 : 312.0) Quinone reductase family protein; FUNCTIONS IN: oxidoreductase activity, FMN binding; INVOLVED IN: negative regulation of transcription; LOCATED IN: plasma membrane; EXPRESSED IN: 21 plant structures; EXPRESSED DURING: 13 growth stages; CONTAINS InterPro DOMAIN/s: Flavoprotein WrbA (InterPro:IPR010089), NADPH-dependent FMN reductase (InterPro:IPR005025), Flavodoxin/nitric oxid…
Bin: 11.8	lipid metabolism.'exotics'(steroids, squalene etc)
	Id: seq_1387
	(at4g36750 : 332.0) Quinone reductase family protein; FUNCTIONS IN: oxidoreductase activity, FMN binding; INVOLVED IN: negative regulation of transcription; LOCATED IN: plasma membrane; EXPRESSED IN: 24 plant structures; EXPRESSED DURING: 13 growth stages; CONTAINS InterPro DOMAIN/s: Flavoprotein WrbA (InterPro:IPR010089), Flavodoxin/nitric oxide synthase (InterPro:IPR008254); BEST Arabidopsis th…
Bin: 11.6	lipid metabolism.lipid transfer proteins etc
	Id: seq_316
	(q9m5x7|nltp_maldo : 107.0) Nonspecific lipid-transfer protein precursor (LTP) (Allergen Mal d 3) - Malus domestica (Apple) (Malus sylvestris) & (gnl|cdd|72939 : 104.0) no description available & (at2g38540 : 96.3) Non-specific lipid transfer protein. Binds calmodulin in a Ca2+-independent manner. Localized to the cell wall. Specifically expressed in L1 epidermal layer. Predicted to be a member o…
Bin: 11.6	lipid metabolism.lipid transfer proteins etc
	Id: seq_1249
	(q42762|nltp1_goshi : 112.0) Nonspecific lipid-transfer protein precursor (LTP) - Gossypium hirsutum (Upland cotton) & (gnl|cdd|72939 : 104.0) no description available & (at2g38540 : 91.7) Non-specific lipid transfer protein. Binds calmodulin in a Ca2+-independent manner. Localized to the cell wall. Specifically expressed in L1 epidermal layer. Predicted to be a member of PR-14 pathogenesis-relat…
Bin: 11.5.1	lipid metabolism.glyceral metabolism.glycerol kinase
	Id: seq_184
	(at1g80460 : 828.0) Encodes a protein similar to glycerol kinase, which converts glycerol to glycerol 3-phosphate and performs a rate-limiting step in glycerol metabolism. This gene is required for both general and specific resistance against bacteria and fungi. Arabidopsis thaliana glycerol kinase (GLR1) mRNA.Involved in flagellin-induced non-host resistance to Pseudomonas. Coronatine partially …
Bin: 11.4	lipid metabolism.TAG synthesis
	Id: seq_1379
	(at2g25890 : 134.0) Oleosin family protein; FUNCTIONS IN: molecular_function unknown; INVOLVED IN: lipid storage; LOCATED IN: monolayer-surrounded lipid storage body, integral to membrane, membrane; EXPRESSED IN: petal, leaf whorl, flower, carpel; EXPRESSED DURING: 4 anthesis, petal differentiation and expansion stage; CONTAINS InterPro DOMAIN/s: Oleosin (InterPro:IPR000136); BEST Arabidopsis tha…
Bin: 11.4	lipid metabolism.TAG synthesis
	Id: seq_1574
	(p29110|oleo3_brana : 128.0) Oleosin Bn-III (BnIII) - Brassica napus (Rape) & (gnl|cdd|65100 : 128.0) no description available & (at4g25140 : 125.0) Encodes oleosin1, a protein found in oil bodies, involved in seed lipid accumulation. Suppression of OLEO1 (and OLEO2) resulted in an aberrant phenotype of embryo cells that contain unusually large oilbodies that are not normally observed in seeds. C…
Bin: 11.3	lipid metabolism.Phospholipid synthesis
	Id: seq_994
	(at3g18000 : 874.0) Arabidopsis thaliana N-methyltransferase-like protein mRNA. Reduce transmission through pollen.; XIPOTL 1 (XPL1); CONTAINS InterPro DOMAIN/s: Methyltransferase type 11 (InterPro:IPR013216); BEST Arabidopsis thaliana protein match is: S-adenosyl-L-methionine-dependent methyltransferases superfamily protein (TAIR:AT1G48600.2); Has 22524 Blast hits to 22132 proteins in 2666 speci…
Bin: 11.1.31	lipid metabolism.FA synthesis and FA elongation.pyruvate DH
	Id: seq_218
	(at3g16950 : 153.0) encodes a plastid lipoamide dehydrogenase, subunit of the pyruvate dehydrogenase complex which provides acetyl-CoA for de novo fatty acid biosynthesis. The gene is highly expressed in developing seeds.; lipoamide dehydrogenase 1 (LPD1); CONTAINS InterPro DOMAIN/s: FAD-dependent pyridine nucleotide-disulphide oxidoreductase (InterPro:IPR013027), Pyridine nucleotide-disulphide o…
Bin: 11.1.31	lipid metabolism.FA synthesis and FA elongation.pyruvate DH
	Id: seq_282
	(at2g34590 : 644.0) Transketolase family protein; FUNCTIONS IN: pyruvate dehydrogenase (acetyl-transferring) activity, zinc ion binding, transketolase activity; INVOLVED IN: pollen tube development; LOCATED IN: chloroplast, chloroplast envelope; EXPRESSED IN: 22 plant structures; EXPRESSED DURING: 14 growth stages; CONTAINS InterPro DOMAIN/s: Transketolase, C-terminal (InterPro:IPR005476), Transk…
Bin: 11.1.31	lipid metabolism.FA synthesis and FA elongation.pyruvate DH
	Id: seq_1024
	(at3g25860 : 393.0) Nuclear encoded dihydrolipoamide S-acetyltransferase (LTA2) that encodes teh Pyruvate Decarboxylase E2 subunit. Mutant has embryo defect.; LTA2; FUNCTIONS IN: dihydrolipoyllysine-residue acetyltransferase activity; INVOLVED IN: metabolic process, acetyl-CoA biosynthetic process from pyruvate; LOCATED IN: cytosolic ribosome, chloroplast stroma, chloroplast, membrane, chloroplas…
Bin: 11.1.31	lipid metabolism.FA synthesis and FA elongation.pyruvate DH
	Id: seq_1523
	(at3g16950 : 456.0) encodes a plastid lipoamide dehydrogenase, subunit of the pyruvate dehydrogenase complex which provides acetyl-CoA for de novo fatty acid biosynthesis. The gene is highly expressed in developing seeds.; lipoamide dehydrogenase 1 (LPD1); CONTAINS InterPro DOMAIN/s: FAD-dependent pyridine nucleotide-disulphide oxidoreductase (InterPro:IPR013027), Pyridine nucleotide-disulphide o…
Bin: 11.1.30	lipid metabolism.FA synthesis and FA elongation.pyruvate kinase
	Id: seq_849
	(q40546|kpyg_tobac : 826.0) Pyruvate kinase isozyme G, chloroplast precursor (EC 2.7.1.40) - Nicotiana tabacum (Common tobacco) & (at1g32440 : 793.0) encodes a chloroplast pyruvate kinase beta subunit. The enzyme is less active than the other chloroplast pyruvate kinase beta subunit encoded by AT5G52920. Involved in seed oil biosynthesis. Can partially complement the AT5G52920 mutant.; plastidial…
Bin: 11.1.30	lipid metabolism.FA synthesis and FA elongation.pyruvate kinase
	Id: seq_1348
	(at5g52920 : 919.0) encodes a dominant chloroplast pyruvate kinase beta subunit. Important for seed oil biosynthesis. Ubiquitously expressed, with significantly increased expression in maturing seeds. The mutant plant has wrinkled seeds, with a 50-70% reduction in seed fatty acid content.; plastidic pyruvate kinase beta subunit 1 (PKP-BETA1); FUNCTIONS IN: pyruvate kinase activity; INVOLVED IN: r…
Bin: 11.1.15	lipid metabolism.FA synthesis and FA elongation.ACP desaturase
	Id: seq_934
	(p22337|stad_ricco : 704.0) Acyl-[acyl-carrier-protein] desaturase, chloroplast precursor (EC 1.14.19.2) (Stearoyl-ACP desaturase) (Delta(9) stearoyl-acyl carrier protein desaturase) - Ricinus communis (Castor bean) & (at2g43710 : 641.0) Encodes a stearoyl-ACP desaturase, involved in fatty acid desaturation. The ssi2 mutants have increased 18:0 and reduced 18:1 fatty acids. Exogenous application …
Bin: 11.1.13	lipid metabolism.FA synthesis and FA elongation.acyl-CoA binding protein
	Id: seq_768
	(at3g05420 : 667.0) Acyl-CoA binding protein with high affinity for oleoyl-CoA. Expressed in all plant organs. Involved in fatty acid transport.; acyl-CoA binding protein 4 (ACBP4); FUNCTIONS IN: acyl-CoA binding; INVOLVED IN: lipid transport; LOCATED IN: cytosol, nucleus; EXPRESSED IN: 27 plant structures; EXPRESSED DURING: 15 growth stages; CONTAINS InterPro DOMAIN/s: Galactose oxidase/kelch, b…
Bin: 11.1.13	lipid metabolism.FA synthesis and FA elongation.acyl-CoA binding protein
	Id: seq_2147
	(at3g05420 : 249.0) Acyl-CoA binding protein with high affinity for oleoyl-CoA. Expressed in all plant organs. Involved in fatty acid transport.; acyl-CoA binding protein 4 (ACBP4); FUNCTIONS IN: acyl-CoA binding; INVOLVED IN: lipid transport; LOCATED IN: cytosol, nucleus; EXPRESSED IN: 27 plant structures; EXPRESSED DURING: 15 growth stages; CONTAINS InterPro DOMAIN/s: Galactose oxidase/kelch, b…
Bin: 11.1.9	lipid metabolism.FA synthesis and FA elongation.long chain fatty acid CoA ligase
	Id: seq_527
	(at2g04350 : 863.0) long-chain acyl-CoA synthetase 8 (LACS8); FUNCTIONS IN: long-chain fatty acid-CoA ligase activity, catalytic activity; INVOLVED IN: fatty acid biosynthetic process, metabolic process; LOCATED IN: endoplasmic reticulum; EXPRESSED IN: 23 plant structures; EXPRESSED DURING: 13 growth stages; CONTAINS InterPro DOMAIN/s: AMP-binding, conserved site (InterPro:IPR020845), AMP-depende…
Bin: 11.1.9	lipid metabolism.FA synthesis and FA elongation.long chain fatty acid CoA ligase
	Id: seq_2000
	(at2g04350 : 126.0) long-chain acyl-CoA synthetase 8 (LACS8); FUNCTIONS IN: long-chain fatty acid-CoA ligase activity, catalytic activity; INVOLVED IN: fatty acid biosynthetic process, metabolic process; LOCATED IN: endoplasmic reticulum; EXPRESSED IN: 23 plant structures; EXPRESSED DURING: 13 growth stages; CONTAINS InterPro DOMAIN/s: AMP-binding, conserved site (InterPro:IPR020845), AMP-depende…
Bin: 11.1.8	lipid metabolism.FA synthesis and FA elongation.acyl coa ligase
	Id: seq_530
	(at3g16910 : 909.0) Encodes a peroxisomal protein with acetyl-CoA synthetase activity that is responsible for the activation of acetate for entry into the glyoxylate cycle.; acyl-activating enzyme 7 (AAE7); FUNCTIONS IN: acetate-CoA ligase activity, AMP binding; INVOLVED IN: glyoxylate cycle, acetate metabolic process; LOCATED IN: peroxisome; EXPRESSED IN: 23 plant structures; EXPRESSED DURING: 1…
Bin: 11.1.7	lipid metabolism.FA synthesis and FA elongation.ACP thioesterase
	Id: seq_1409
	(at3g25110 : 501.0) Encodes a FatA acyl-ACP thioesterase; fatA acyl-ACP thioesterase (FaTA); CONTAINS InterPro DOMAIN/s: Acyl-ACP thioesterase (InterPro:IPR002864); BEST Arabidopsis thaliana protein match is: Acyl-ACP thioesterase (TAIR:AT4G13050.1); Has 1414 Blast hits to 1414 proteins in 571 species: Archae - 0; Bacteria - 1089; Metazoa - 0; Fungi - 0; Plants - 317; Viruses - 0; Other Eukaryote…
Bin: 11.1.6	lipid metabolism.FA synthesis and FA elongation.enoyl ACP reductase
	Id: seq_911
	(at2g05990 : 320.0) Encodes enoyl-ACP reductase a component of the fatty acid synthase complex. A reduced function mutation in this gene, mod1, was found in a screen for premature cell death mutants. Mutant plants have reduced lipid level and pleiotropic morphological defects, including chlorotic and abnormally shaped leaves.; MOSAIC DEATH 1 (MOD1); FUNCTIONS IN: enoyl-[acyl-carrier-protein] redu…
Bin: 11.1.6	lipid metabolism.FA synthesis and FA elongation.enoyl ACP reductase
	Id: seq_1792
	(at2g05990 : 499.0) Encodes enoyl-ACP reductase a component of the fatty acid synthase complex. A reduced function mutation in this gene, mod1, was found in a screen for premature cell death mutants. Mutant plants have reduced lipid level and pleiotropic morphological defects, including chlorotic and abnormally shaped leaves.; MOSAIC DEATH 1 (MOD1); FUNCTIONS IN: enoyl-[acyl-carrier-protein] redu…
Bin: 11.1.5	lipid metabolism.FA synthesis and FA elongation.beta hydroxyacyl ACP dehydratase
	Id: seq_1425
	(at5g10160 : 293.0) Thioesterase superfamily protein; FUNCTIONS IN: hydro-lyase activity, 3-hydroxyacyl-[acyl-carrier-protein] dehydratase activity; INVOLVED IN: fatty acid biosynthetic process; LOCATED IN: cell wall, chloroplast, membrane; EXPRESSED IN: 22 plant structures; EXPRESSED DURING: 13 growth stages; CONTAINS InterPro DOMAIN/s: Beta-hydroxyacyl-(acyl-carrier-protein) dehydratase, FabA/F…
Bin: 11.1.5	lipid metabolism.FA synthesis and FA elongation.beta hydroxyacyl ACP dehydratase
	Id: seq_1647
	(at5g10160 : 293.0) Thioesterase superfamily protein; FUNCTIONS IN: hydro-lyase activity, 3-hydroxyacyl-[acyl-carrier-protein] dehydratase activity; INVOLVED IN: fatty acid biosynthetic process; LOCATED IN: cell wall, chloroplast, membrane; EXPRESSED IN: 22 plant structures; EXPRESSED DURING: 13 growth stages; CONTAINS InterPro DOMAIN/s: Beta-hydroxyacyl-(acyl-carrier-protein) dehydratase, FabA/F…
Bin: 11.1.4	lipid metabolism.FA synthesis and FA elongation.ACP oxoacyl reductase
	Id: seq_162
	(q93x62|fabg1_brana : 397.0) 3-oxoacyl-[acyl-carrier-protein] reductase 1, chloroplast precursor (EC 1.1.1.100) (3-ketoacyl-acyl carrier protein reductase 1) (Beta-keto acyl-carrier protein reductase 1) - Brassica napus (Rape) & (at1g24360 : 378.0) NAD(P)-binding Rossmann-fold superfamily protein; FUNCTIONS IN: 3-oxoacyl-[acyl-carrier-protein] reductase activity, copper ion binding; INVOLVED IN: …
Bin: 11.1.3	lipid metabolism.FA synthesis and FA elongation.ketoacyl ACP synthase
	Id: seq_537
	(at5g46290 : 752.0) 3-ketoacyl-acyl carrier protein synthase I (KAS I) mRNA,; 3-ketoacyl-acyl carrier protein synthase I (KAS I); FUNCTIONS IN: transferase activity, transferring acyl groups other than amino-acyl groups, fatty acid synthase activity, catalytic activity; INVOLVED IN: biosynthetic process, metabolic process, fatty acid biosynthetic process; EXPRESSED IN: 23 plant structures; EXPRES…
Bin: 11.1.3	lipid metabolism.FA synthesis and FA elongation.ketoacyl ACP synthase
	Id: seq_1263
	(at1g62640 : 604.0) 3-ketoacyl-acyl carrier protein synthase III (KAS III); 3-ketoacyl-acyl carrier protein synthase III (KAS III); FUNCTIONS IN: transferase activity, transferring acyl groups other than amino-acyl groups, 3-oxoacyl-[acyl-carrier-protein] synthase activity, catalytic activity; INVOLVED IN: lipid biosynthetic process, metabolic process, fatty acid biosynthetic process; LOCATED IN:…
Bin: 11.1.2	lipid metabolism.FA synthesis and FA elongation.Acetyl CoA Transacylase
	Id: seq_1519
	(at2g30200 : 520.0) catalytics;transferases;[acyl-carrier-protein] S-malonyltransferases;binding; FUNCTIONS IN: binding, transferase activity, catalytic activity; INVOLVED IN: metabolic process; LOCATED IN: chloroplast; EXPRESSED IN: 23 plant structures; EXPRESSED DURING: 14 growth stages; CONTAINS InterPro DOMAIN/s: Acyl transferase/acyl hydrolase/lysophospholipase (InterPro:IPR016035), Acyl tra…
Bin: 11.1.1.2.4	lipid metabolism.FA synthesis and FA elongation.Acetyl CoA Carboxylation.heteromeric Complex.Biotin Carboxylase
	Id: seq_1237
	(at5g35360 : 884.0) Encodes biotin carboxylase subunit (CAC2).; acetyl Co-enzyme a carboxylase biotin carboxylase subunit (CAC2); CONTAINS InterPro DOMAIN/s: Carbamoyl phosphate synthase, large subunit, N-terminal (InterPro:IPR005481), Carbamoyl phosphate synthetase, large subunit, ATP-binding (InterPro:IPR005479), Acetyl-CoA carboxylase, biotin carboxylase (InterPro:IPR004549), PreATP-grasp-like…
Bin: 11.1.1.2.4	lipid metabolism.FA synthesis and FA elongation.Acetyl CoA Carboxylation.heteromeric Complex.Biotin Carboxylase
	Id: seq_1534
	(at5g35360 : 894.0) Encodes biotin carboxylase subunit (CAC2).; acetyl Co-enzyme a carboxylase biotin carboxylase subunit (CAC2); CONTAINS InterPro DOMAIN/s: Carbamoyl phosphate synthase, large subunit, N-terminal (InterPro:IPR005481), Carbamoyl phosphate synthetase, large subunit, ATP-binding (InterPro:IPR005479), Acetyl-CoA carboxylase, biotin carboxylase (InterPro:IPR004549), PreATP-grasp-like…
Bin: 11.1.1.2.3	lipid metabolism.FA synthesis and FA elongation.Acetyl CoA Carboxylation.heteromeric Complex.Biotin Carboxyl Carrier Protein
	Id: seq_1507
	(at5g16390 : 181.0) Encodes for the biotin carboxyl-carrier subunit of the multi-enzyme plastidial acetyl-coenzyme A carboxylase complex.; BIOTIN CARBOXYL-CARRIER PROTEIN 1 (BCCP-1); FUNCTIONS IN: acetyl-CoA carboxylase activity, biotin binding; INVOLVED IN: fatty acid biosynthetic process; LOCATED IN: chloroplast; EXPRESSED IN: 22 plant structures; EXPRESSED DURING: 13 growth stages; CONTAINS In…
Bin: 11.1.1.2.3	lipid metabolism.FA synthesis and FA elongation.Acetyl CoA Carboxylation.heteromeric Complex.Biotin Carboxyl Carrier Protein
	Id: seq_1897
	(at5g15530 : 112.0) biotin carboxyl carrier protein isoform 2 (BCCP2) mRNA,; biotin carboxyl carrier protein 2 (BCCP2); FUNCTIONS IN: biotin binding; INVOLVED IN: fatty acid biosynthetic process; LOCATED IN: chloroplast; EXPRESSED IN: 21 plant structures; EXPRESSED DURING: 13 growth stages; CONTAINS InterPro DOMAIN/s: Biotin-binding site (InterPro:IPR001882), Single hybrid motif (InterPro:IPR0110…
Bin: 11.1.1.2.2	lipid metabolism.FA synthesis and FA elongation.Acetyl CoA Carboxylation.heteromeric Complex.beta Carboxyltransferase
	Id: seq_2232
	(p12219|accd_tobac : 119.0) Acetyl-coenzyme A carboxylase carboxyl transferase subunit beta (EC 6.4.1.2) (ACCase beta chain) - Nicotiana tabacum (Common tobacco) & (atcg00500 : 101.0) Encodes the carboxytransferase beta subunit of the Acetyl-CoA carboxylase (ACCase) complex in plastids. This complex catalyzes the carboxylation of acetyl-CoA to produce malonyl-CoA, the first committed step in fatt…
Bin: 11.1.1.2.1	lipid metabolism.FA synthesis and FA elongation.Acetyl CoA Carboxylation.heteromeric Complex.alpha Carboxyltransferase
	Id: seq_797
	(at2g38040 : 366.0) encodes the carboxyltransferase alpha subunit of acetyl-CoA carboxylase, involved in de novo fatty acid biosynthesis; acetyl Co-enzyme a carboxylase carboxyltransferase alpha subunit (CAC3); FUNCTIONS IN: acetyl-CoA carboxylase activity; INVOLVED IN: fatty acid biosynthetic process; LOCATED IN: acetyl-CoA carboxylase complex, chloroplast, membrane, chloroplast envelope; EXPRES…
Bin: 11.1.1.2.1	lipid metabolism.FA synthesis and FA elongation.Acetyl CoA Carboxylation.heteromeric Complex.alpha Carboxyltransferase
	Id: seq_1977
	(at2g38040 : 317.0) encodes the carboxyltransferase alpha subunit of acetyl-CoA carboxylase, involved in de novo fatty acid biosynthesis; acetyl Co-enzyme a carboxylase carboxyltransferase alpha subunit (CAC3); FUNCTIONS IN: acetyl-CoA carboxylase activity; INVOLVED IN: fatty acid biosynthetic process; LOCATED IN: acetyl-CoA carboxylase complex, chloroplast, membrane, chloroplast envelope; EXPRES…
Bin: 11.1.1	lipid metabolism.FA synthesis and FA elongation.Acetyl CoA Carboxylation
	Id: seq_960
	(at3g56130 : 202.0) biotin/lipoyl attachment domain-containing protein; CONTAINS InterPro DOMAIN/s: Single hybrid motif (InterPro:IPR011053), Biotin/lipoyl attachment (InterPro:IPR000089), Galactose-binding domain-like (InterPro:IPR008979); BEST Arabidopsis thaliana protein match is: Single hybrid motif superfamily protein (TAIR:AT3G15690.2). & (reliability: 404.0) & (original description: no ori…
12. N-metabolism.N-degradation
Bin: 12.3.1	N-metabolism.N-degradation.glutamate dehydrogenase
	Id: seq_782
	(at5g18170 : 793.0) Encodes the 43 kDa alpha-subunit of the glutamate dehydrogenase with a putative mitochondrial transit polypeptide and NAD(H)- and alpha-ketoglutarate-binding domains. Mitochondrial localization confirmed by subcellular fractionation. Combines in several ratios with GDH2 protein (GDH-beta) to form seven isoenzymes. Catalyzes the cleavage of glycine residues. May be involved in …
Bin: 12.3.1	N-metabolism.N-degradation.glutamate dehydrogenase
	Id: seq_2058
	(o04937|dhea_nicpl : 155.0) Glutamate dehydrogenase A (EC 1.4.1.3) (GDH A) - Nicotiana plumbaginifolia (Leadwort-leaved tobacco) & (at5g07440 : 148.0) Encodes the alpha-subunit of the glutamate dehydrogenase. The enzyme is almost exclusively found in the mitochondria of stem and leaf companion cells.; glutamate dehydrogenase 2 (GDH2); FUNCTIONS IN: in 7 functions; INVOLVED IN: response to salt st…
Bin: 12.3.1	N-metabolism.N-degradation.glutamate dehydrogenase
	Id: seq_2067
	(at5g07440 : 762.0) Encodes the alpha-subunit of the glutamate dehydrogenase. The enzyme is almost exclusively found in the mitochondria of stem and leaf companion cells.; glutamate dehydrogenase 2 (GDH2); FUNCTIONS IN: in 7 functions; INVOLVED IN: response to salt stress; LOCATED IN: mitochondrion, plasma membrane; EXPRESSED IN: 27 plant structures; EXPRESSED DURING: 16 growth stages; CONTAINS I…
Bin: 12.3.1	N-metabolism.N-degradation.glutamate dehydrogenase
	Id: seq_2068
	(at5g07440 : 386.0) Encodes the alpha-subunit of the glutamate dehydrogenase. The enzyme is almost exclusively found in the mitochondria of stem and leaf companion cells.; glutamate dehydrogenase 2 (GDH2); FUNCTIONS IN: in 7 functions; INVOLVED IN: response to salt stress; LOCATED IN: mitochondrion, plasma membrane; EXPRESSED IN: 27 plant structures; EXPRESSED DURING: 16 growth stages; CONTAINS I…
Bin: 12.2.99	N-metabolism.ammonia metabolism.unspecified
	Id: seq_1621
	(at5g57440 : 387.0) a member of haloacid dehalogenase-like hydrolase family; GS1; FUNCTIONS IN: hydrolase activity, catalytic activity; INVOLVED IN: metabolic process; LOCATED IN: mitochondrion; EXPRESSED IN: 22 plant structures; EXPRESSED DURING: 13 growth stages; CONTAINS InterPro DOMAIN/s: Haloacid dehalogenase-like hydrolase (InterPro:IPR005834), HAD-superfamily hydrolase, subfamily IA, varia…
Bin: 12.2.2	N-metabolism.ammonia metabolism.glutamine synthetase
	Id: seq_901
	(p15102|glna4_phavu : 518.0) Glutamine synthetase leaf isozyme, chloroplast precursor (EC 6.3.1.2) (Isozyme delta) (Glutamate--ammonia ligase) - Phaseolus vulgaris (Kidney bean) (French bean) & (at5g35630 : 503.0) chloroplastic glutamine synthetase; glutamine synthetase 2 (GS2); FUNCTIONS IN: glutamate-ammonia ligase activity; INVOLVED IN: in 8 processes; LOCATED IN: in 6 components; EXPRESSED IN…
Bin: 12.2.2	N-metabolism.ammonia metabolism.glutamine synthetase
	Id: seq_1191
	(p51118|glna1_vitvi : 155.0) Glutamine synthetase cytosolic isozyme 1 (EC 6.3.1.2) (Glutamate--ammonia ligase) - Vitis vinifera (Grape) & (at1g66200 : 150.0) encodes a cytosolic glutamate synthetase, this enzyme has low affinity with substrate ammonium; glutamine synthase clone F11 (GSR2); CONTAINS InterPro DOMAIN/s: Glutamine synthetase, catalytic domain (InterPro:IPR008146), Glutamine synthetas…
Bin: 12.2.2	N-metabolism.ammonia metabolism.glutamine synthetase
	Id: seq_1280
	(p51118|glna1_vitvi : 600.0) Glutamine synthetase cytosolic isozyme 1 (EC 6.3.1.2) (Glutamate--ammonia ligase) - Vitis vinifera (Grape) & (at5g37600 : 585.0) encodes a cytosolic glutamine synthetase, the enzyme has high affinity with substrate ammonium; glutamine synthase clone R1 (GSR 1); FUNCTIONS IN: glutamate-ammonia ligase activity, copper ion binding; INVOLVED IN: nitrate assimilation, resp…
Bin: 12.2.2	N-metabolism.ammonia metabolism.glutamine synthetase
	Id: seq_1639
	(o22506|glna2_dauca : 260.0) Glutamine synthetase, chloroplast precursor (EC 6.3.1.2) (Glutamate--ammonia ligase) (GS2) - Daucus carota (Carrot) & (at5g35630 : 207.0) chloroplastic glutamine synthetase; glutamine synthetase 2 (GS2); FUNCTIONS IN: glutamate-ammonia ligase activity; INVOLVED IN: in 8 processes; LOCATED IN: in 6 components; EXPRESSED IN: 23 plant structures; EXPRESSED DURING: 14 gro…
Bin: 12.2.2	N-metabolism.ammonia metabolism.glutamine synthetase
	Id: seq_1675
	(p51118|glna1_vitvi : 134.0) Glutamine synthetase cytosolic isozyme 1 (EC 6.3.1.2) (Glutamate--ammonia ligase) - Vitis vinifera (Grape) & (at5g16570 : 130.0) Encodes a cytosolic glutamine synthetase, the enzyme has high affinity with substrate ammonium; glutamine synthetase 1;4 (GLN1;4); CONTAINS InterPro DOMAIN/s: Glutamine synthetase, catalytic domain (InterPro:IPR008146), Glutamine synthetase,…
Bin: 12.2.2	N-metabolism.ammonia metabolism.glutamine synthetase
	Id: seq_1743
	(p51119|glna2_vitvi : 141.0) Glutamine synthetase cytosolic isozyme 2 (EC 6.3.1.2) (Glutamate--ammonia ligase) - Vitis vinifera (Grape) & (at1g66200 : 138.0) encodes a cytosolic glutamate synthetase, this enzyme has low affinity with substrate ammonium; glutamine synthase clone F11 (GSR2); CONTAINS InterPro DOMAIN/s: Glutamine synthetase, catalytic domain (InterPro:IPR008146), Glutamine synthetas…
Bin: 12.2.1.1	N-metabolism.ammonia metabolism.glutamate synthase.ferredoxin dependent
	Id: seq_707
	(at5g04140 : 2847.0) Encodes a gene whose sequence is similar to ferredoxin dependent glutamate synthase (Fd-GOGAT). Expression in leaves is induced by light and sucrose. Proposed to be involved in photorespiration and nitrogen assimilation.; glutamate synthase 1 (GLU1); FUNCTIONS IN: protein binding, glutamate synthase (ferredoxin) activity; INVOLVED IN: response to light stimulus, photorespirat…
13. amino acid metabolism
Bin: 13.99	amino acid metabolism.misc
	Id: seq_756
	(at1g49820 : 682.0) encodes 5-methylthioribose kinase, involved in methionine cycle; S-methyl-5-thioribose kinase (MTK); CONTAINS InterPro DOMAIN/s: Methylthioribose kinase (InterPro:IPR009212), Aminoglycoside phosphotransferase (InterPro:IPR002575), Protein kinase-like domain (InterPro:IPR011009); Has 954 Blast hits to 954 proteins in 299 species: Archae - 0; Bacteria - 750; Metazoa - 4; Fungi -…
Bin: 13.2.6.3	amino acid metabolism.degradation.aromatic aa.tryptophan
	Id: seq_97
	(at4g16210 : 397.0) enoyl-CoA hydratase/isomerase A (ECHIA); FUNCTIONS IN: catalytic activity; INVOLVED IN: metabolic process; LOCATED IN: peroxisome; EXPRESSED IN: 22 plant structures; EXPRESSED DURING: 13 growth stages; CONTAINS InterPro DOMAIN/s: Crotonase, core (InterPro:IPR001753); BEST Arabidopsis thaliana protein match is: enoyl-CoA hydratase/isomerase D (TAIR:AT1G60550.1); Has 36619 Blast…
Bin: 13.2.6.3	amino acid metabolism.degradation.aromatic aa.tryptophan
	Id: seq_531
	(at5g48230 : 632.0) acetoacetyl-CoA thiolase 2 (ACAT2); FUNCTIONS IN: transferase activity, transferring acyl groups other than amino-acyl groups, acetyl-CoA C-acetyltransferase activity, catalytic activity; INVOLVED IN: embryo development ending in seed dormancy; LOCATED IN: peroxisome, plasma membrane; EXPRESSED IN: 24 plant structures; EXPRESSED DURING: 13 growth stages; CONTAINS InterPro DOMA…
Bin: 13.2.6.3	amino acid metabolism.degradation.aromatic aa.tryptophan
	Id: seq_793
	(at4g13360 : 528.0) ATP-dependent caseinolytic (Clp) protease/crotonase family protein; FUNCTIONS IN: catalytic activity; INVOLVED IN: metabolic process; EXPRESSED IN: 24 plant structures; EXPRESSED DURING: 14 growth stages; CONTAINS InterPro DOMAIN/s: Crotonase, core (InterPro:IPR001753); BEST Arabidopsis thaliana protein match is: ATP-dependent caseinolytic (Clp) protease/crotonase family prote…
Bin: 13.2.6.2	amino acid metabolism.degradation.aromatic aa.tyrosine
	Id: seq_851
	(at1g12050 : 708.0) fumarylacetoacetase, putative; FUNCTIONS IN: fumarylacetoacetase activity, catalytic activity; INVOLVED IN: aromatic amino acid family metabolic process, metabolic process; LOCATED IN: cellular_component unknown; EXPRESSED IN: 23 plant structures; EXPRESSED DURING: 13 growth stages; CONTAINS InterPro DOMAIN/s: Fumarylacetoacetase, C-terminal-like (InterPro:IPR002529), Fumaryla…
Bin: 13.2.5.3	amino acid metabolism.degradation.serine-glycine-cysteine group.cysteine
	Id: seq_161
	(at1g79230 : 549.0) encodes a sulfurtransferase/rhodaneses, which belongs to a group of enzymes widely distributed in all three phyla that catalyze the transfer of sulfur from a donor to a thiophilic acceptor substrate. The protein and transcript levels are NOT affected by senescence or exogenous cyanide, suggesting that sulfurtransferases are involved in cyanide detoxification.; mercaptopyruvate…
Bin: 13.2.5.2	amino acid metabolism.degradation.serine-glycine-cysteine group.glycine
	Id: seq_457
	(p54260|gcst_soltu : 666.0) Aminomethyltransferase, mitochondrial precursor (EC 2.1.2.10) (Glycine cleavage system T protein) (GCVT) - Solanum tuberosum (Potato) & (at1g11860 : 651.0) Glycine cleavage T-protein family; FUNCTIONS IN: aminomethyltransferase activity; EXPRESSED IN: 23 plant structures; EXPRESSED DURING: 14 growth stages; CONTAINS InterPro DOMAIN/s: Glycine cleavage system T protein …
Bin: 13.2.5.2	amino acid metabolism.degradation.serine-glycine-cysteine group.glycine
	Id: seq_1120
	(p13443|dhgy_cucsa : 665.0) Glycerate dehydrogenase (EC 1.1.1.29) (NADH-dependent hydroxypyruvate reductase) (HPR) (GDH) - Cucumis sativus (Cucumber) & (at1g68010 : 644.0) Encodes hydroxypyruvate reductase.; hydroxypyruvate reductase (HPR); CONTAINS InterPro DOMAIN/s: D-isomer specific 2-hydroxyacid dehydrogenase, catalytic domain (InterPro:IPR006139), D-isomer specific 2-hydroxyacid dehydrogenas…
Bin: 13.2.5.2	amino acid metabolism.degradation.serine-glycine-cysteine group.glycine
	Id: seq_1340
	(at1g68010 : 445.0) Encodes hydroxypyruvate reductase.; hydroxypyruvate reductase (HPR); CONTAINS InterPro DOMAIN/s: D-isomer specific 2-hydroxyacid dehydrogenase, catalytic domain (InterPro:IPR006139), D-isomer specific 2-hydroxyacid dehydrogenase, NAD-binding (InterPro:IPR006140), NAD(P)-binding domain (InterPro:IPR016040); BEST Arabidopsis thaliana protein match is: D-3-phosphoglycerate dehydr…
Bin: 13.2.4.5	amino acid metabolism.degradation.branched chain group.isoleucine
	Id: seq_531
	(at5g48230 : 632.0) acetoacetyl-CoA thiolase 2 (ACAT2); FUNCTIONS IN: transferase activity, transferring acyl groups other than amino-acyl groups, acetyl-CoA C-acetyltransferase activity, catalytic activity; INVOLVED IN: embryo development ending in seed dormancy; LOCATED IN: peroxisome, plasma membrane; EXPRESSED IN: 24 plant structures; EXPRESSED DURING: 13 growth stages; CONTAINS InterPro DOMA…
Bin: 13.2.4.4	amino acid metabolism.degradation.branched chain group.leucine
	Id: seq_1786
	(q42777|mcca_soybn : 165.0) Methylcrotonoyl-CoA carboxylase subunit alpha, mitochondrial precursor (EC 6.4.1.4) (3-methylcrotonyl-CoA carboxylase 1) (MCCase subunit alpha) (3-methylcrotonyl-CoA:carbon dioxide ligase subunit alpha) - Glycine max (Soybean) & (at1g03090 : 138.0) MCCA is the biotinylated subunit of the dimer MCCase, which is involved in leucine degradation. Both subunits are nuclear …
Bin: 13.2.4.4	amino acid metabolism.degradation.branched chain group.leucine
	Id: seq_1913
	(at4g34030 : 202.0) MCC-B is involved in leucine degradation in mitochondria. The active protein is a dimer of MCC-A and MCC-B. MCC-A is biotinylated whereas MCC-B is not.; 3-methylcrotonyl-CoA carboxylase (MCCB); FUNCTIONS IN: biotin carboxylase activity, cobalt ion binding, methylcrotonoyl-CoA carboxylase activity, zinc ion binding; INVOLVED IN: leucine catabolic process; LOCATED IN: mitochondr…
Bin: 13.2.4.3	amino acid metabolism.degradation.branched chain group.valine
	Id: seq_265
	(at2g14170 : 882.0) Arabidopsis thaliana methylmalonate-semialdehyde dehydrogenase; aldehyde dehydrogenase 6B2 (ALDH6B2); CONTAINS InterPro DOMAIN/s: Aldehyde/histidinol dehydrogenase (InterPro:IPR016161), Aldehyde dehydrogenase (InterPro:IPR015590), Aldehyde dehydrogenase, N-terminal (InterPro:IPR016162), Aldehyde dehydrogenase, conserved site (InterPro:IPR016160), Methylmalonate-semialdehyde de…
Bin: 13.2.4.1	amino acid metabolism.degradation.branched chain group.shared
	Id: seq_919
	(gnl|cdd|36603 : 669.0) no description available & (at2g33150 : 659.0) Encodes an organellar (peroxisome, glyoxysome) 3-ketoacyl-CoA thiolase, involved in fatty acid b-oxidation during germination and subsequent seedling growth. Mutants have defects in glyoxysomal fatty acid beta-oxidation. EC2.3.1.16 thiolase.; peroxisomal 3-ketoacyl-CoA thiolase 3 (PKT3); FUNCTIONS IN: acetyl-CoA C-acyltransfer…
Bin: 13.2.4.1	amino acid metabolism.degradation.branched chain group.shared
	Id: seq_1311
	(at2g38400 : 743.0) alanine:glyoxylate aminotransferase 2 homolog (AGT3) mRNA,; alanine:glyoxylate aminotransferase 3 (AGT3); FUNCTIONS IN: pyridoxal phosphate binding, transaminase activity, catalytic activity, alanine-glyoxylate transaminase activity; EXPRESSED IN: 22 plant structures; EXPRESSED DURING: 15 growth stages; CONTAINS InterPro DOMAIN/s: Pyridoxal phosphate-dependent transferase, maj…
Bin: 13.2.3.4	amino acid metabolism.degradation.aspartate family.methionine
	Id: seq_125
	(p35007|sahh_catro : 912.0) Adenosylhomocysteinase (EC 3.3.1.1) (S-adenosyl-L-homocysteine hydrolase) (AdoHcyase) - Catharanthus roseus (Rosy periwinkle) (Madagascar periwinkle) & (at3g23810 : 906.0) S-adenosyl-l-homocysteine (SAH) hydrolase 2 (SAHH2); FUNCTIONS IN: adenosylhomocysteinase activity; INVOLVED IN: one-carbon metabolic process; LOCATED IN: plasma membrane, vacuole, membrane; EXPRESSE…
Bin: 13.2.3.4	amino acid metabolism.degradation.aspartate family.methionine
	Id: seq_1611
	(p50246|sahh_medsa : 188.0) Adenosylhomocysteinase (EC 3.3.1.1) (S-adenosyl-L-homocysteine hydrolase) (AdoHcyase) - Medicago sativa (Alfalfa) & (at3g23810 : 184.0) S-adenosyl-l-homocysteine (SAH) hydrolase 2 (SAHH2); FUNCTIONS IN: adenosylhomocysteinase activity; INVOLVED IN: one-carbon metabolic process; LOCATED IN: plasma membrane, vacuole, membrane; EXPRESSED IN: 33 plant structures; EXPRESSED…
Bin: 13.2.3.4	amino acid metabolism.degradation.aspartate family.methionine
	Id: seq_1885
	(p35007|sahh_catro : 532.0) Adenosylhomocysteinase (EC 3.3.1.1) (S-adenosyl-L-homocysteine hydrolase) (AdoHcyase) - Catharanthus roseus (Rosy periwinkle) (Madagascar periwinkle) & (at4g13940 : 531.0) Encodes a S-adenosyl-L-homocysteine hydrolase required for DNA methylation-dependent gene silencing.; HOMOLOGY-DEPENDENT GENE SILENCING 1 (HOG1); FUNCTIONS IN: adenosylhomocysteinase activity; INVOLV…
Bin: 13.2.3.2	amino acid metabolism.degradation.aspartate family.threonine
	Id: seq_974
	(o49818|lgul_cicar : 335.0) Lactoylglutathione lyase (EC 4.4.1.5) (Methylglyoxalase) (Aldoketomutase) (Glyoxalase I) (Glx I) (Ketone-aldehyde mutase) (S-D-lactoylglutathione methylglyoxal lyase) - Cicer arietinum (Chickpea) (Garbanzo) & (at1g08110 : 319.0) lactoylglutathione lyase family protein / glyoxalase I family protein; FUNCTIONS IN: calmodulin binding, lactoylglutathione lyase activity; IN…
Bin: 13.2.3.1.1	amino acid metabolism.degradation.aspartate family.asparagine.L-asparaginase
	Id: seq_1661
	(at5g08100 : 167.0) N-terminal nucleophile aminohydrolases (Ntn hydrolases) superfamily protein; CONTAINS InterPro DOMAIN/s: Peptidase T2, asparaginase 2 (InterPro:IPR000246); BEST Arabidopsis thaliana protein match is: N-terminal nucleophile aminohydrolases (Ntn hydrolases) superfamily protein (TAIR:AT3G16150.1); Has 35333 Blast hits to 34131 proteins in 2444 species: Archae - 798; Bacteria - 22…
Bin: 13.2.2.3	amino acid metabolism.degradation.glutamate family.arginine
	Id: seq_736
	(at5g46180 : 754.0) Encodes an ornithine delta-aminotransferase that is transcriptionally up-regulated in young seedlings and in response to salt stress. It is unlikely to play a role in salt-stress-induced proline accumulation, however, it appears to participate in arginine and ornithine catabolism.; ornithine-delta-aminotransferase (DELTA-OAT); FUNCTIONS IN: ornithine-oxo-acid transaminase acti…
Bin: 13.2.2.3	amino acid metabolism.degradation.glutamate family.arginine
	Id: seq_1066
	(at2g34470 : 476.0) Encodes a urease accessory protein which is essential for the activation of plant urease.; urease accessory protein G (UREG); FUNCTIONS IN: nickel ion binding, nucleotide binding, metal ion binding, ATP binding; INVOLVED IN: nitrogen compound metabolic process, positive regulation of metalloenzyme activity; LOCATED IN: membrane; EXPRESSED IN: 22 plant structures; EXPRESSED DUR…
Bin: 13.2.2.3	amino acid metabolism.degradation.glutamate family.arginine
	Id: seq_1254
	(at1g67550 : 1376.0) Encodes a nickel-containing urea hydrolase involved in nitrogen recycling. It requires three urease accessory proteins for its activation.; urease (URE); CONTAINS InterPro DOMAIN/s: Urease, alpha subunit (InterPro:IPR005848), Urease, alpha subunit, conserved site (InterPro:IPR017950), Amidohydrolase 1 (InterPro:IPR006680), Urease, alpha/gamma subunit (InterPro:IPR002026), Ure…
Bin: 13.2.2.3	amino acid metabolism.degradation.glutamate family.arginine
	Id: seq_1412
	(at4g08900 : 611.0) Encodes an arginase, likely to be involved in polyamine biosynthesis in pollen.; arginase; FUNCTIONS IN: arginase activity, cobalt ion binding, agmatinase activity; INVOLVED IN: defense response to bacterium, arginine catabolic process, polyamine metabolic process; LOCATED IN: chloroplast; EXPRESSED IN: 8 plant structures; CONTAINS InterPro DOMAIN/s: Ureohydrolase (InterPro:IP…
Bin: 13.2.2.2	amino acid metabolism.degradation.glutamate family.proline
	Id: seq_77
	(at5g62530 : 487.0) Encodes mitochondrial Delta-pyrroline-5- carboxylate dehydrogenase. Involved in the catabolism of proline to glutamate. Involved in protection from proline toxicity. Induced at pathogen infection sites. P5CDH and SRO5 (an overlapping gene in the sense orientation) generate 24-nt and 21-nt siRNAs, which together are components of a regulatory loop controlling reactive oxygen sp…
Bin: 13.2.2.2	amino acid metabolism.degradation.glutamate family.proline
	Id: seq_1957
	(at5g62530 : 168.0) Encodes mitochondrial Delta-pyrroline-5- carboxylate dehydrogenase. Involved in the catabolism of proline to glutamate. Involved in protection from proline toxicity. Induced at pathogen infection sites. P5CDH and SRO5 (an overlapping gene in the sense orientation) generate 24-nt and 21-nt siRNAs, which together are components of a regulatory loop controlling reactive oxygen sp…
Bin: 13.2.2.2	amino acid metabolism.degradation.glutamate family.proline
	Id: seq_1980
	(at5g62530 : 151.0) Encodes mitochondrial Delta-pyrroline-5- carboxylate dehydrogenase. Involved in the catabolism of proline to glutamate. Involved in protection from proline toxicity. Induced at pathogen infection sites. P5CDH and SRO5 (an overlapping gene in the sense orientation) generate 24-nt and 21-nt siRNAs, which together are components of a regulatory loop controlling reactive oxygen sp…
Bin: 13.1.7.9	amino acid metabolism.synthesis.histidine.histidinol dehydrogenase
	Id: seq_2256
	(at5g63890 : 89.0) Encodes histidinol dehydrogenase. Up-regulated in response to UV-B.; histidinol dehydrogenase (HDH); FUNCTIONS IN: histidinol dehydrogenase activity; INVOLVED IN: response to UV, pollen development; LOCATED IN: chloroplast, chloroplast stroma; EXPRESSED IN: 23 plant structures; EXPRESSED DURING: 14 growth stages; CONTAINS InterPro DOMAIN/s: Aldehyde/histidinol dehydrogenase (In…
Bin: 13.1.7.4	amino acid metabolism.synthesis.histidine.N'-5'-phosphoribosyl-formimino-5-aminoimidazole-4-carboxamide ribonucleotide isomerase
	Id: seq_1290
	(at4g26900 : 967.0) encodes a glutamine amidotransferase and cyclase, catalyzes the fifth and sixth steps of the histidine biosynthetic pathway; HIS HF (AT-HF); FUNCTIONS IN: imidazoleglycerol-phosphate synthase activity; INVOLVED IN: histidine biosynthetic process; LOCATED IN: chloroplast; EXPRESSED IN: 23 plant structures; EXPRESSED DURING: 14 growth stages; CONTAINS InterPro DOMAIN/s: Imidazol…
Bin: 13.1.7.1	amino acid metabolism.synthesis.histidine.ATP phosphoribosyl transferase
	Id: seq_1016
	(at1g09795 : 584.0) ATP phosphoribosyl transferase, catalyses first step of histidine biosynthesis; ATP phosphoribosyl transferase 2 (ATP-PRT2); FUNCTIONS IN: ATP phosphoribosyltransferase activity; INVOLVED IN: histidine biosynthetic process; LOCATED IN: chloroplast; EXPRESSED IN: 24 plant structures; EXPRESSED DURING: 14 growth stages; CONTAINS InterPro DOMAIN/s: Histidine biosynthesis HisG: AT…
Bin: 13.1.6.5.5	amino acid metabolism.synthesis.aromatic aa.tryptophan.tryptophan synthase
	Id: seq_585
	(at5g54810 : 755.0) A.thaliana tryptophan synthase beta subunit (trpB); tryptophan synthase beta-subunit 1 (TSB1); FUNCTIONS IN: tryptophan synthase activity; INVOLVED IN: response to oxidative stress, tryptophan biosynthetic process, response to salt stress, indoleacetic acid biosynthetic process; LOCATED IN: chloroplast stroma, chloroplast; EXPRESSED IN: guard cell, root; CONTAINS InterPro DOMA…
Bin: 13.1.6.5.5	amino acid metabolism.synthesis.aromatic aa.tryptophan.tryptophan synthase
	Id: seq_928
	(at3g54640 : 414.0) Catalyzes the conversion of indole-3-glycerolphosphate to indole, the penultimate reaction in the biosynthesis of tryptophan. Functions as a heterocomplex with tryptophan synthase beta subunit (TSA2).; tryptophan synthase alpha chain (TSA1); FUNCTIONS IN: tryptophan synthase activity; INVOLVED IN: tryptophan biosynthetic process, defense response to bacterium, defense response…
Bin: 13.1.6.5.4	amino acid metabolism.synthesis.aromatic aa.tryptophan.indole-3-glycerol phosphate synthase
	Id: seq_1495
	(at5g48220 : 471.0) Aldolase-type TIM barrel family protein; FUNCTIONS IN: indole-3-glycerol-phosphate synthase activity, catalytic activity; INVOLVED IN: metabolic process, tryptophan metabolic process; EXPRESSED IN: 22 plant structures; EXPRESSED DURING: 13 growth stages; CONTAINS InterPro DOMAIN/s: Aldolase-type TIM barrel (InterPro:IPR013785), Indole-3-glycerol phosphate synthase, conserved s…
Bin: 13.1.6.5.2	amino acid metabolism.synthesis.aromatic aa.tryptophan.anthranilate phosphoribosyltransferase
	Id: seq_1247
	(at5g17990 : 509.0) Encodes the tryptophan biosynthetic enzyme phosphoribosylanthranilate transferase (PAT1, called trpD in bacteria). Converts anthranilate and phosphoribosylpyrophosphate into phosphoribosylanthranilate and inorganic pyrophosphate.; tryptophan biosynthesis 1 (TRP1); FUNCTIONS IN: anthranilate phosphoribosyltransferase activity; INVOLVED IN: tryptophan biosynthetic process; LOCAT…
Bin: 13.1.6.1.10	amino acid metabolism.synthesis.aromatic aa.chorismate.dehydroquinate/shikimate dehydrogenase
	Id: seq_175
	(at3g06350 : 505.0) MATERNAL EFFECT EMBRYO ARREST 32 (MEE32); FUNCTIONS IN: NADP or NADPH binding, 3-dehydroquinate dehydratase activity, shikimate 5-dehydrogenase activity, binding, catalytic activity; INVOLVED IN: embryo development ending in seed dormancy; LOCATED IN: chloroplast stroma, chloroplast; EXPRESSED IN: 23 plant structures; EXPRESSED DURING: 15 growth stages; CONTAINS InterPro DOMAI…
Bin: 13.1.6.1.10	amino acid metabolism.synthesis.aromatic aa.chorismate.dehydroquinate/shikimate dehydrogenase
	Id: seq_752
	(at3g06350 : 135.0) MATERNAL EFFECT EMBRYO ARREST 32 (MEE32); FUNCTIONS IN: NADP or NADPH binding, 3-dehydroquinate dehydratase activity, shikimate 5-dehydrogenase activity, binding, catalytic activity; INVOLVED IN: embryo development ending in seed dormancy; LOCATED IN: chloroplast stroma, chloroplast; EXPRESSED IN: 23 plant structures; EXPRESSED DURING: 15 growth stages; CONTAINS InterPro DOMAI…
Bin: 13.1.6.1.10	amino acid metabolism.synthesis.aromatic aa.chorismate.dehydroquinate/shikimate dehydrogenase
	Id: seq_1527
	(at3g06350 : 143.0) MATERNAL EFFECT EMBRYO ARREST 32 (MEE32); FUNCTIONS IN: NADP or NADPH binding, 3-dehydroquinate dehydratase activity, shikimate 5-dehydrogenase activity, binding, catalytic activity; INVOLVED IN: embryo development ending in seed dormancy; LOCATED IN: chloroplast stroma, chloroplast; EXPRESSED IN: 23 plant structures; EXPRESSED DURING: 15 growth stages; CONTAINS InterPro DOMAI…
Bin: 13.1.6.1.10	amino acid metabolism.synthesis.aromatic aa.chorismate.dehydroquinate/shikimate dehydrogenase
	Id: seq_1622
	(at3g06350 : 94.7) MATERNAL EFFECT EMBRYO ARREST 32 (MEE32); FUNCTIONS IN: NADP or NADPH binding, 3-dehydroquinate dehydratase activity, shikimate 5-dehydrogenase activity, binding, catalytic activity; INVOLVED IN: embryo development ending in seed dormancy; LOCATED IN: chloroplast stroma, chloroplast; EXPRESSED IN: 23 plant structures; EXPRESSED DURING: 15 growth stages; CONTAINS InterPro DOMAIN…
Bin: 13.1.6.1.10	amino acid metabolism.synthesis.aromatic aa.chorismate.dehydroquinate/shikimate dehydrogenase
	Id: seq_1671
	(at3g06350 : 182.0) MATERNAL EFFECT EMBRYO ARREST 32 (MEE32); FUNCTIONS IN: NADP or NADPH binding, 3-dehydroquinate dehydratase activity, shikimate 5-dehydrogenase activity, binding, catalytic activity; INVOLVED IN: embryo development ending in seed dormancy; LOCATED IN: chloroplast stroma, chloroplast; EXPRESSED IN: 23 plant structures; EXPRESSED DURING: 15 growth stages; CONTAINS InterPro DOMAI…
Bin: 13.1.6.1.10	amino acid metabolism.synthesis.aromatic aa.chorismate.dehydroquinate/shikimate dehydrogenase
	Id: seq_1835
	(at3g06350 : 94.7) MATERNAL EFFECT EMBRYO ARREST 32 (MEE32); FUNCTIONS IN: NADP or NADPH binding, 3-dehydroquinate dehydratase activity, shikimate 5-dehydrogenase activity, binding, catalytic activity; INVOLVED IN: embryo development ending in seed dormancy; LOCATED IN: chloroplast stroma, chloroplast; EXPRESSED IN: 23 plant structures; EXPRESSED DURING: 15 growth stages; CONTAINS InterPro DOMAIN…
Bin: 13.1.6.1.10	amino acid metabolism.synthesis.aromatic aa.chorismate.dehydroquinate/shikimate dehydrogenase
	Id: seq_1884
	(at3g06350 : 174.0) MATERNAL EFFECT EMBRYO ARREST 32 (MEE32); FUNCTIONS IN: NADP or NADPH binding, 3-dehydroquinate dehydratase activity, shikimate 5-dehydrogenase activity, binding, catalytic activity; INVOLVED IN: embryo development ending in seed dormancy; LOCATED IN: chloroplast stroma, chloroplast; EXPRESSED IN: 23 plant structures; EXPRESSED DURING: 15 growth stages; CONTAINS InterPro DOMAI…
Bin: 13.1.6.1.6	amino acid metabolism.synthesis.aromatic aa.chorismate.5-enolpyruvylshikimate-3-phosphate synthase
	Id: seq_196
	(p11043|aroa_pethy : 782.0) 3-phosphoshikimate 1-carboxyvinyltransferase, chloroplast precursor (EC 2.5.1.19) (5-enolpyruvylshikimate-3-phosphate synthase) (EPSP synthase) - Petunia hybrida (Petunia) & (at2g45300 : 758.0) encodes 3-phosphoshikimate 1-carboxyvinyltransferase / 5-enolpyruvylshikimate-3-phosphate / EPSP synthase involved in chorismate biosynthesis; RNA 3'-terminal phosphate cyclase/…
Bin: 13.1.6.1.6	amino acid metabolism.synthesis.aromatic aa.chorismate.5-enolpyruvylshikimate-3-phosphate synthase
	Id: seq_805
	(p11043|aroa_pethy : 407.0) 3-phosphoshikimate 1-carboxyvinyltransferase, chloroplast precursor (EC 2.5.1.19) (5-enolpyruvylshikimate-3-phosphate synthase) (EPSP synthase) - Petunia hybrida (Petunia) & (at2g45300 : 397.0) encodes 3-phosphoshikimate 1-carboxyvinyltransferase / 5-enolpyruvylshikimate-3-phosphate / EPSP synthase involved in chorismate biosynthesis; RNA 3'-terminal phosphate cyclase/…
Bin: 13.1.6.1.2	amino acid metabolism.synthesis.aromatic aa.chorismate.3-dehydroquinate synthase
	Id: seq_636
	(at5g66120 : 624.0) 3-dehydroquinate synthase, putative; FUNCTIONS IN: 3-dehydroquinate synthase activity; INVOLVED IN: aromatic amino acid family biosynthetic process; LOCATED IN: chloroplast; EXPRESSED IN: 23 plant structures; EXPRESSED DURING: 14 growth stages; CONTAINS InterPro DOMAIN/s: 3-dehydroquinate synthase AroB, subgroup (InterPro:IPR016037), 3-dehydroquinate synthase AroB (InterPro:IP…
Bin: 13.1.6.1.2	amino acid metabolism.synthesis.aromatic aa.chorismate.3-dehydroquinate synthase
	Id: seq_2138
	(at5g66120 : 95.1) 3-dehydroquinate synthase, putative; FUNCTIONS IN: 3-dehydroquinate synthase activity; INVOLVED IN: aromatic amino acid family biosynthetic process; LOCATED IN: chloroplast; EXPRESSED IN: 23 plant structures; EXPRESSED DURING: 14 growth stages; CONTAINS InterPro DOMAIN/s: 3-dehydroquinate synthase AroB, subgroup (InterPro:IPR016037), 3-dehydroquinate synthase AroB (InterPro:IPR…
Bin: 13.1.6.1.1	amino acid metabolism.synthesis.aromatic aa.chorismate.3-deoxy-D-arabino-heptulosonate 7-phosphate synthase
	Id: seq_103
	(p37822|arog_soltu : 869.0) Phospho-2-dehydro-3-deoxyheptonate aldolase 2, chloroplast precursor (EC 2.5.1.54) (Phospho-2-keto-3-deoxyheptonate aldolase 2) (DAHP synthetase 2) (3-deoxy-D-arabino-heptulosonate 7-phosphate synthase 2) - Solanum tuberosum (Potato) & (at4g39980 : 867.0) Encodes a 2-deoxy-D-arabino-heptulosonate 7-phosphate (DAHP) synthase, which catalyzes the first committed step in …
Bin: 13.1.6.1.1	amino acid metabolism.synthesis.aromatic aa.chorismate.3-deoxy-D-arabino-heptulosonate 7-phosphate synthase
	Id: seq_995
	(p21357|arof_soltu : 892.0) Phospho-2-dehydro-3-deoxyheptonate aldolase 1, chloroplast precursor (EC 2.5.1.54) (Phospho-2-keto-3-deoxyheptonate aldolase 1) (DAHP synthetase 1) (3-deoxy-D-arabino-heptulosonate 7-phosphate synthase 1) - Solanum tuberosum (Potato) & (at1g22410 : 875.0) Class-II DAHP synthetase family protein; FUNCTIONS IN: 3-deoxy-7-phosphoheptulonate synthase activity; INVOLVED IN:…
Bin: 13.1.5.3.1	amino acid metabolism.synthesis.serine-glycine-cysteine group.cysteine.OASTL
	Id: seq_544
	(q00834|cysk_spiol : 494.0) Cysteine synthase (EC 2.5.1.47) (O-acetylserine sulfhydrylase) (O-acetylserine (Thiol)-lyase) (CSase A) (OAS-TL A) - Spinacia oleracea (Spinach) & (gnl|cdd|36466 : 467.0) no description available & (at4g14880 : 462.0) Encodes a cytosolic isoform of cytosolic O-acetylserine(thiol)lyase, a key enzyme in cysteine biosynthesis and for the fixation of inorganic sulfide. It …
Bin: 13.1.5.3.1	amino acid metabolism.synthesis.serine-glycine-cysteine group.cysteine.OASTL
	Id: seq_861
	(o81155|cyskp_soltu : 529.0) Cysteine synthase, chloroplast precursor (EC 2.5.1.47) (O-acetylserine sulfhydrylase) (O-acetylserine (Thiol)-lyase) (CSase B) (CS-B) (OAS-TL B) - Solanum tuberosum (Potato) & (at3g59760 : 513.0) Arabidopsis thaliana O-acetylserine (thiol) lyase (OAS-TL) isoform oasC; O-acetylserine (thiol) lyase isoform C (OASC); FUNCTIONS IN: protein binding, cysteine synthase activ…
Bin: 13.1.5.3.1	amino acid metabolism.synthesis.serine-glycine-cysteine group.cysteine.OASTL
	Id: seq_1074
	(o81154|cysk_soltu : 493.0) Cysteine synthase (EC 2.5.1.47) (O-acetylserine sulfhydrylase) (O-acetylserine (Thiol)-lyase) (CSase A) (CS-A) (OAS-TL A) - Solanum tuberosum (Potato) & (at4g14880 : 472.0) Encodes a cytosolic isoform of cytosolic O-acetylserine(thiol)lyase, a key enzyme in cysteine biosynthesis and for the fixation of inorganic sulfide. It catalyzes the formation of cysteine from O-ac…
Bin: 13.1.5.3.1	amino acid metabolism.synthesis.serine-glycine-cysteine group.cysteine.OASTL
	Id: seq_1196
	(at3g61440 : 541.0) Encodes a cysteine synthase isomer CysC1. The isomer is however less effective in cysteine biosynthesis. It is involved in beta-cyanoalanine biosynthesis, an intermediate of cyanide detoxification pathway.; cysteine synthase C1 (CYSC1); CONTAINS InterPro DOMAIN/s: Pyridoxal phosphate-dependent enzyme, beta subunit (InterPro:IPR001926); BEST Arabidopsis thaliana protein match i…
Bin: 13.1.5.3	amino acid metabolism.synthesis.serine-glycine-cysteine group.cysteine
	Id: seq_548
	(at5g65720 : 738.0) cysteine desulfurase whose activity is dependent on AtSufE activation.; nitrogen fixation S (NIFS)-like 1 (NFS1); FUNCTIONS IN: transaminase activity, zinc ion binding, cysteine desulfurase activity, ATP binding; INVOLVED IN: iron-sulfur cluster assembly; LOCATED IN: mitochondrion; EXPRESSED IN: 23 plant structures; EXPRESSED DURING: 13 growth stages; CONTAINS InterPro DOMAIN/…
Bin: 13.1.5.2.2	amino acid metabolism.synthesis.serine-glycine-cysteine group.glycine.glycine transaminase
	Id: seq_231
	(at1g70580 : 905.0) Encodes a protein with glyoxylate aminotransferase activity. It can act on a number of different small substrates and amino acids in vitro.; alanine-2-oxoglutarate aminotransferase 2 (AOAT2); FUNCTIONS IN: glycine:2-oxoglutarate aminotransferase activity, L-alanine:2-oxoglutarate aminotransferase activity, alanine-glyoxylate transaminase activity; INVOLVED IN: photorespiration…
Bin: 13.1.5.1.2	amino acid metabolism.synthesis.serine-glycine-cysteine group.serine.phosphoserine aminotransferase
	Id: seq_361
	(at4g35630 : 646.0) Encodes a phosphoserine aminotransferase which is involved in serine biosynthesis in the chloroplast which operates via the phosphorylated pathway.; phosphoserine aminotransferase (PSAT); FUNCTIONS IN: O-phospho-L-serine:2-oxoglutarate aminotransferase activity; INVOLVED IN: L-serine biosynthetic process; LOCATED IN: chloroplast stroma, chloroplast; EXPRESSED IN: 23 plant stru…
Bin: 13.1.5.1.1	amino acid metabolism.synthesis.serine-glycine-cysteine group.serine.phosphoglycerate dehydrogenase
	Id: seq_708
	(at4g34200 : 798.0) embryo sac development arrest 9 (EDA9); FUNCTIONS IN: ATP binding; INVOLVED IN: megagametogenesis; LOCATED IN: mitochondrion, chloroplast, membrane; EXPRESSED IN: 26 plant structures; EXPRESSED DURING: 14 growth stages; CONTAINS InterPro DOMAIN/s: D-3-phosphoglycerate dehydrogenase (InterPro:IPR006236), D-isomer specific 2-hydroxyacid dehydrogenase, catalytic domain (InterPro:…
Bin: 13.1.5.1.1	amino acid metabolism.synthesis.serine-glycine-cysteine group.serine.phosphoglycerate dehydrogenase
	Id: seq_1004
	(at3g19480 : 764.0) D-3-phosphoglycerate dehydrogenase; FUNCTIONS IN: in 7 functions; INVOLVED IN: oxidation reduction, L-serine biosynthetic process, metabolic process; LOCATED IN: mitochondrion, chloroplast; EXPRESSED IN: 19 plant structures; EXPRESSED DURING: 10 growth stages; CONTAINS InterPro DOMAIN/s: D-3-phosphoglycerate dehydrogenase (InterPro:IPR006236), D-isomer specific 2-hydroxyacid d…
Bin: 13.1.4.4.3	amino acid metabolism.synthesis.branched chain group.leucine specific.3-isopropylmalate dehydrogenase
	Id: seq_559
	(at1g31180 : 647.0) The AtIMD3 is one out of 3 genes encoding the enzyme 3-isopropylmalate dehydrogenase involved in leucine biosynthesis in Arabidopsis. Its subcellular location has been targeted to plastids.; isopropylmalate dehydrogenase 3 (IMD3); FUNCTIONS IN: 3-isopropylmalate dehydrogenase activity; INVOLVED IN: leucine biosynthetic process, response to salt stress, metabolic process; LOCAT…
Bin: 13.1.4.4.1	amino acid metabolism.synthesis.branched chain group.leucine specific.2-isopropylmalate synthase
	Id: seq_1255
	(at1g74040 : 937.0) Encodes an active Arabidopsis isopropylmalate synthase IPMS2. Involved in leucine biosynthesis. Do not participate in the chain elongation of glucosinolates. Expressed constitutively throughout the plant. Loss of IPMS2 can be compensated by a second isopropylmalate synthase gene IPMS1 (At1g18500).; 2-isopropylmalate synthase 1 (IMS1); FUNCTIONS IN: 2-isopropylmalate synthase a…
Bin: 13.1.4.1.4	amino acid metabolism.synthesis.branched chain group.common.branched-chain amino acid aminotransferase
	Id: seq_1582
	(at5g65780 : 178.0) encodes a chloroplast branched-chain amino acid aminotransferase, can complement the yeast leu/iso-leu/val auxotrophy mutant; ATBCAT-5; FUNCTIONS IN: branched-chain-amino-acid transaminase activity, catalytic activity; LOCATED IN: mitochondrion, chloroplast; EXPRESSED IN: 23 plant structures; EXPRESSED DURING: 13 growth stages; BEST Arabidopsis thaliana protein match is: littl…
Bin: 13.1.4.1.2	amino acid metabolism.synthesis.branched chain group.common.ketol-acid reductoisomerase
	Id: seq_598
	(at3g58610 : 922.0) ketol-acid reductoisomerase; CONTAINS InterPro DOMAIN/s: Acetohydroxy acid isomeroreductase, catalytic (InterPro:IPR013116), 6-phosphogluconate dehydrogenase, C-terminal-like (InterPro:IPR008927), Dehydrogenase, multihelical (InterPro:IPR013328), Acetohydroxy acid isomeroreductase C-terminal (InterPro:IPR000506), Ketol-acid reductoisomerase (InterPro:IPR016206), Acetohydroxy a…
Bin: 13.1.4.1.1	amino acid metabolism.synthesis.branched chain group.common.acetolactate synthase
	Id: seq_299
	(at2g31810 : 651.0) ACT domain-containing small subunit of acetolactate synthase protein; FUNCTIONS IN: acetolactate synthase activity, amino acid binding; INVOLVED IN: branched chain family amino acid biosynthetic process; LOCATED IN: chloroplast; EXPRESSED IN: 24 plant structures; EXPRESSED DURING: 13 growth stages; CONTAINS InterPro DOMAIN/s: Acetolactate synthase, small subunit (InterPro:IPR0…
Bin: 13.1.4.1.1	amino acid metabolism.synthesis.branched chain group.common.acetolactate synthase
	Id: seq_843
	(p09342|ilv1_tobac : 1015.0) Acetolactate synthase 1, chloroplast precursor (EC 2.2.1.6) (Acetolactate synthase I) (Acetohydroxy-acid synthase I) (ALS I) - Nicotiana tabacum (Common tobacco) & (at3g48560 : 997.0) Catalyzes the formation of acetolactate from pyruvate, the first step in valine and isoleucine biosynthesis. Requires FAD, thiamine pyrophosphate and Mg. Inhibited by the sulphonylurea h…
Bin: 13.1.3.6.1.4	amino acid metabolism.synthesis.aspartate family.misc.homoserine.homoserine kinase
	Id: seq_1820
	(at2g17265 : 408.0) Encodes a homoserine kinase (HSK) which produces O-phospho-L-homoserine (HserP), a compound at the branching point of methionine and threonine biosynthesis. HSK is found in the stromal fraction of chloroplasts. Mutants are susceptible to downy mildew fungus Hyaloperonospora parasitica.; homoserine kinase (HSK); FUNCTIONS IN: homoserine kinase activity; INVOLVED IN: methionine …
Bin: 13.1.3.6.1.2	amino acid metabolism.synthesis.aspartate family.misc.homoserine.aspartate semialdehyde dehydrogenase
	Id: seq_1421
	(at1g14810 : 587.0) encodes an aspartate semialdehyde dehydrogenase, which produces the branch point intermediate for lysine and threonine/methionine biosynthesis; semialdehyde dehydrogenase family protein; FUNCTIONS IN: oxidoreductase activity, acting on the aldehyde or oxo group of donors, NAD or NADP as acceptor, aspartate-semialdehyde dehydrogenase activity; INVOLVED IN: cellular amino acid b…
Bin: 13.1.3.5.5	amino acid metabolism.synthesis.aspartate family.lysine.diaminopimelate decarboxylase
	Id: seq_729
	(at5g11880 : 762.0) Pyridoxal-dependent decarboxylase family protein; FUNCTIONS IN: diaminopimelate decarboxylase activity; INVOLVED IN: lysine biosynthetic process via diaminopimelate; LOCATED IN: chloroplast; EXPRESSED IN: guard cell, cultured cell; CONTAINS InterPro DOMAIN/s: Alanine racemase/group IV decarboxylase, C-terminal (InterPro:IPR009006), Ornithine/DAP/Arg decarboxylase (InterPro:IPR…
Bin: 13.1.3.5.4	amino acid metabolism.synthesis.aspartate family.lysine.diaminopimelate epimerase
	Id: seq_943
	(at3g53580 : 497.0) diaminopimelate epimerase family protein; FUNCTIONS IN: diaminopimelate epimerase activity; INVOLVED IN: lysine biosynthetic process via diaminopimelate; LOCATED IN: chloroplast; EXPRESSED IN: 24 plant structures; EXPRESSED DURING: 15 growth stages; CONTAINS InterPro DOMAIN/s: Diaminopimelate epimerase, active site (InterPro:IPR018510), Diaminopimelate epimerase (InterPro:IPR0…
Bin: 13.1.3.5.3	amino acid metabolism.synthesis.aspartate family.lysine.LL-diaminopimelic acid aminotransferase
	Id: seq_98
	(at4g33680 : 156.0) Involved in disease resistance against Pseudomonas syringae. mutants have elevated SA levels, a low level of spontaneous cell death, callose deposition, and enlarged cells in leaves. genetically maps on chr 4 between L23H3 and nga1139.; ABERRANT GROWTH AND DEATH 2 (AGD2); FUNCTIONS IN: transaminase activity, copper ion binding, L,L-diaminopimelate aminotransferase activity; IN…
Bin: 13.1.3.5.3	amino acid metabolism.synthesis.aspartate family.lysine.LL-diaminopimelic acid aminotransferase
	Id: seq_896
	(at4g33680 : 108.0) Involved in disease resistance against Pseudomonas syringae. mutants have elevated SA levels, a low level of spontaneous cell death, callose deposition, and enlarged cells in leaves. genetically maps on chr 4 between L23H3 and nga1139.; ABERRANT GROWTH AND DEATH 2 (AGD2); FUNCTIONS IN: transaminase activity, copper ion binding, L,L-diaminopimelate aminotransferase activity; IN…
Bin: 13.1.3.5.1	amino acid metabolism.synthesis.aspartate family.lysine.dihydrodipicolinate synthase
	Id: seq_1606
	(at2g45440 : 602.0) Encodes a protein that likely has dihydropicolinate synthase activity based on its mutant phenotype of decreased lysine levels and increased aspartate levels. The mutant also has increased levels of threonine. The enzyme is predicted to localize to the chloroplast.; dihydrodipicolinate synthase (DHDPS2); FUNCTIONS IN: dihydrodipicolinate synthase activity; INVOLVED IN: lysine …
Bin: 13.1.3.4.13	amino acid metabolism.synthesis.aspartate family.methionine.methionine S-methyltransferase
	Id: seq_2204
	(q9mbc2|mmt1_horvu : 113.0) Methionine S-methyltransferase (EC 2.1.1.12) (AdoMet:Met S-methyltransferase) (Hv-MMT1) - Hordeum vulgare (Barley) & (at5g49810 : 112.0) Arabidopsis thaliana methionine S-methyltransferase, an enzyme that catalyzes S -methylmethionine formation.; methionine S-methyltransferase (MMT); CONTAINS InterPro DOMAIN/s: Aminotransferase, class I/classII (InterPro:IPR004839), Py…
Bin: 13.1.3.4.11	amino acid metabolism.synthesis.aspartate family.methionine.S-adenosylmethionine synthetase
	Id: seq_224
	(q96551|metk_catro : 420.0) S-adenosylmethionine synthetase 1 (EC 2.5.1.6) (Methionine adenosyltransferase 1) (AdoMet synthetase 1) - Catharanthus roseus (Rosy periwinkle) (Madagascar periwinkle) & (at4g01850 : 409.0) S-adenosylmethionine synthetase 2 (SAM-2); FUNCTIONS IN: methionine adenosyltransferase activity; INVOLVED IN: one-carbon metabolic process, S-adenosylmethionine biosynthetic proces…
Bin: 13.1.3.4.11	amino acid metabolism.synthesis.aspartate family.methionine.S-adenosylmethionine synthetase
	Id: seq_279
	(q96551|metk_catro : 752.0) S-adenosylmethionine synthetase 1 (EC 2.5.1.6) (Methionine adenosyltransferase 1) (AdoMet synthetase 1) - Catharanthus roseus (Rosy periwinkle) (Madagascar periwinkle) & (at1g02500 : 730.0) encodes a S-adenosylmethionine synthetase. SAM1 is regulated by protein S-nitrosylation. The covalent binding of nitric oxide (NO) to the Cys114 residue inhibits the enzyme activity…
Bin: 13.1.3.4.11	amino acid metabolism.synthesis.aspartate family.methionine.S-adenosylmethionine synthetase
	Id: seq_751
	(q96552|metl_catro : 748.0) S-adenosylmethionine synthetase 2 (EC 2.5.1.6) (Methionine adenosyltransferase 2) (AdoMet synthetase 2) - Catharanthus roseus (Rosy periwinkle) (Madagascar periwinkle) & (at3g17390 : 731.0) S-adenosylmethionine synthetase; METHIONINE OVER-ACCUMULATOR 3 (MTO3); FUNCTIONS IN: methionine adenosyltransferase activity; INVOLVED IN: lignin biosynthetic process, response to c…
Bin: 13.1.3.4.11	amino acid metabolism.synthesis.aspartate family.methionine.S-adenosylmethionine synthetase
	Id: seq_1051
	(at2g36880 : 729.0) methionine adenosyltransferase 3 (MAT3); FUNCTIONS IN: methionine adenosyltransferase activity; INVOLVED IN: one-carbon metabolic process, S-adenosylmethionine biosynthetic process; LOCATED IN: plasma membrane; EXPRESSED IN: 25 plant structures; EXPRESSED DURING: 16 growth stages; CONTAINS InterPro DOMAIN/s: S-adenosylmethionine synthetase (InterPro:IPR002133), S-adenosylmethi…
Bin: 13.1.3.4.3	amino acid metabolism.synthesis.aspartate family.methionine.methionine synthase
	Id: seq_872
	(p93263|mete_mescr : 359.0) 5-methyltetrahydropteroyltriglutamate--homocysteine methyltransferase (EC 2.1.1.14) (Vitamin-B12-independent methionine synthase isozyme) (Cobalamin-independent methionine synthase isozyme) - Mesembryanthemum crystallinum (Common ice pl & (at5g17920 : 352.0) Encodes a cytosolic cobalamin-independent methionine synthase, involved in methionine regeneration via the activ…
Bin: 13.1.3.4.3	amino acid metabolism.synthesis.aspartate family.methionine.methionine synthase
	Id: seq_1162
	(q42699|mete_catro : 332.0) 5-methyltetrahydropteroyltriglutamate--homocysteine methyltransferase (EC 2.1.1.14) (Vitamin-B12-independent methionine synthase isozyme) (Cobalamin-independent methionine synthase isozyme) - Catharanthus roseus (Rosy periwinkle) (Madag & (at5g17920 : 329.0) Encodes a cytosolic cobalamin-independent methionine synthase, involved in methionine regeneration via the activ…
Bin: 13.1.3.4.3	amino acid metabolism.synthesis.aspartate family.methionine.methionine synthase
	Id: seq_1376
	(q42699|mete_catro : 370.0) 5-methyltetrahydropteroyltriglutamate--homocysteine methyltransferase (EC 2.1.1.14) (Vitamin-B12-independent methionine synthase isozyme) (Cobalamin-independent methionine synthase isozyme) - Catharanthus roseus (Rosy periwinkle) (Madag & (at5g17920 : 365.0) Encodes a cytosolic cobalamin-independent methionine synthase, involved in methionine regeneration via the activ…
Bin: 13.1.3.4.3	amino acid metabolism.synthesis.aspartate family.methionine.methionine synthase
	Id: seq_1437
	(q42699|mete_catro : 145.0) 5-methyltetrahydropteroyltriglutamate--homocysteine methyltransferase (EC 2.1.1.14) (Vitamin-B12-independent methionine synthase isozyme) (Cobalamin-independent methionine synthase isozyme) - Catharanthus roseus (Rosy periwinkle) (Madag & (at5g17920 : 144.0) Encodes a cytosolic cobalamin-independent methionine synthase, involved in methionine regeneration via the activ…
Bin: 13.1.3.4.3	amino acid metabolism.synthesis.aspartate family.methionine.methionine synthase
	Id: seq_1908
	(q42699|mete_catro : 171.0) 5-methyltetrahydropteroyltriglutamate--homocysteine methyltransferase (EC 2.1.1.14) (Vitamin-B12-independent methionine synthase isozyme) (Cobalamin-independent methionine synthase isozyme) - Catharanthus roseus (Rosy periwinkle) (Madag & (at5g20980 : 169.0) encodes a plastidic methionine synthase, involved in methionine de novo synthesis in the chloroplast; methionine…
Bin: 13.1.3.4.1	amino acid metabolism.synthesis.aspartate family.methionine.cystathionine gamma-synthase
	Id: seq_674
	(at3g01120 : 719.0) encodes a cystathionine gamma-synthase, which performs the first committed step in methionine biosynthesis. A conserved motif of 13 amino acids in the first exon is required for posttranscriptional autoregulation. This enzyme shares the same substrate as threonine synthase (TS) and its absence transcriptionally affects 8 genes in the genome.; METHIONINE OVERACCUMULATION 1 (MTO…
Bin: 13.1.3.4	amino acid metabolism.synthesis.aspartate family.methionine
	Id: seq_224
	(q96551|metk_catro : 420.0) S-adenosylmethionine synthetase 1 (EC 2.5.1.6) (Methionine adenosyltransferase 1) (AdoMet synthetase 1) - Catharanthus roseus (Rosy periwinkle) (Madagascar periwinkle) & (at4g01850 : 409.0) S-adenosylmethionine synthetase 2 (SAM-2); FUNCTIONS IN: methionine adenosyltransferase activity; INVOLVED IN: one-carbon metabolic process, S-adenosylmethionine biosynthetic proces…
Bin: 13.1.3.4	amino acid metabolism.synthesis.aspartate family.methionine
	Id: seq_232
	(q42699|mete_catro : 1364.0) 5-methyltetrahydropteroyltriglutamate--homocysteine methyltransferase (EC 2.1.1.14) (Vitamin-B12-independent methionine synthase isozyme) (Cobalamin-independent methionine synthase isozyme) - Catharanthus roseus (Rosy periwinkle) (Madag & (at5g17920 : 1338.0) Encodes a cytosolic cobalamin-independent methionine synthase, involved in methionine regeneration via the act…
Bin: 13.1.3.4	amino acid metabolism.synthesis.aspartate family.methionine
	Id: seq_279
	(q96551|metk_catro : 752.0) S-adenosylmethionine synthetase 1 (EC 2.5.1.6) (Methionine adenosyltransferase 1) (AdoMet synthetase 1) - Catharanthus roseus (Rosy periwinkle) (Madagascar periwinkle) & (at1g02500 : 730.0) encodes a S-adenosylmethionine synthetase. SAM1 is regulated by protein S-nitrosylation. The covalent binding of nitric oxide (NO) to the Cys114 residue inhibits the enzyme activity…
Bin: 13.1.3.4	amino acid metabolism.synthesis.aspartate family.methionine
	Id: seq_524
	(at5g17920 : 265.0) Encodes a cytosolic cobalamin-independent methionine synthase, involved in methionine regeneration via the activated methyl cycle (SAM cycle). The protein undergoes thiolation following treatment with the oxidant tert-butylhydroperoxide.; COBALAMIN-INDEPENDENT METHIONINE SYNTHASE (ATCIMS); FUNCTIONS IN: 5-methyltetrahydropteroyltriglutamate-homocysteine S-methyltransferase act…
Bin: 13.1.3.4	amino acid metabolism.synthesis.aspartate family.methionine
	Id: seq_751
	(q96552|metl_catro : 748.0) S-adenosylmethionine synthetase 2 (EC 2.5.1.6) (Methionine adenosyltransferase 2) (AdoMet synthetase 2) - Catharanthus roseus (Rosy periwinkle) (Madagascar periwinkle) & (at3g17390 : 731.0) S-adenosylmethionine synthetase; METHIONINE OVER-ACCUMULATOR 3 (MTO3); FUNCTIONS IN: methionine adenosyltransferase activity; INVOLVED IN: lignin biosynthetic process, response to c…
Bin: 13.1.3.4	amino acid metabolism.synthesis.aspartate family.methionine
	Id: seq_872
	(p93263|mete_mescr : 359.0) 5-methyltetrahydropteroyltriglutamate--homocysteine methyltransferase (EC 2.1.1.14) (Vitamin-B12-independent methionine synthase isozyme) (Cobalamin-independent methionine synthase isozyme) - Mesembryanthemum crystallinum (Common ice pl & (at5g17920 : 352.0) Encodes a cytosolic cobalamin-independent methionine synthase, involved in methionine regeneration via the activ…
Bin: 13.1.3.4	amino acid metabolism.synthesis.aspartate family.methionine
	Id: seq_1051
	(at2g36880 : 729.0) methionine adenosyltransferase 3 (MAT3); FUNCTIONS IN: methionine adenosyltransferase activity; INVOLVED IN: one-carbon metabolic process, S-adenosylmethionine biosynthetic process; LOCATED IN: plasma membrane; EXPRESSED IN: 25 plant structures; EXPRESSED DURING: 16 growth stages; CONTAINS InterPro DOMAIN/s: S-adenosylmethionine synthetase (InterPro:IPR002133), S-adenosylmethi…
Bin: 13.1.3.4	amino acid metabolism.synthesis.aspartate family.methionine
	Id: seq_1162
	(q42699|mete_catro : 332.0) 5-methyltetrahydropteroyltriglutamate--homocysteine methyltransferase (EC 2.1.1.14) (Vitamin-B12-independent methionine synthase isozyme) (Cobalamin-independent methionine synthase isozyme) - Catharanthus roseus (Rosy periwinkle) (Madag & (at5g17920 : 329.0) Encodes a cytosolic cobalamin-independent methionine synthase, involved in methionine regeneration via the activ…
Bin: 13.1.3.4	amino acid metabolism.synthesis.aspartate family.methionine
	Id: seq_1376
	(q42699|mete_catro : 370.0) 5-methyltetrahydropteroyltriglutamate--homocysteine methyltransferase (EC 2.1.1.14) (Vitamin-B12-independent methionine synthase isozyme) (Cobalamin-independent methionine synthase isozyme) - Catharanthus roseus (Rosy periwinkle) (Madag & (at5g17920 : 365.0) Encodes a cytosolic cobalamin-independent methionine synthase, involved in methionine regeneration via the activ…
Bin: 13.1.3.4	amino acid metabolism.synthesis.aspartate family.methionine
	Id: seq_1437
	(q42699|mete_catro : 145.0) 5-methyltetrahydropteroyltriglutamate--homocysteine methyltransferase (EC 2.1.1.14) (Vitamin-B12-independent methionine synthase isozyme) (Cobalamin-independent methionine synthase isozyme) - Catharanthus roseus (Rosy periwinkle) (Madag & (at5g17920 : 144.0) Encodes a cytosolic cobalamin-independent methionine synthase, involved in methionine regeneration via the activ…
Bin: 13.1.3.4	amino acid metabolism.synthesis.aspartate family.methionine
	Id: seq_1465
	(gnl|cdd|81472 : 464.0) no description available & (p93263|mete_mescr : 447.0) 5-methyltetrahydropteroyltriglutamate--homocysteine methyltransferase (EC 2.1.1.14) (Vitamin-B12-independent methionine synthase isozyme) (Cobalamin-independent methionine synthase isozyme) - Mesembryanthemum crystallinum (Common ice pl & (gnl|cdd|37474 : 446.0) no description available & (at3g03780 : 441.0) Encodes a …
Bin: 13.1.3.4	amino acid metabolism.synthesis.aspartate family.methionine
	Id: seq_1908
	(q42699|mete_catro : 171.0) 5-methyltetrahydropteroyltriglutamate--homocysteine methyltransferase (EC 2.1.1.14) (Vitamin-B12-independent methionine synthase isozyme) (Cobalamin-independent methionine synthase isozyme) - Catharanthus roseus (Rosy periwinkle) (Madag & (at5g20980 : 169.0) encodes a plastidic methionine synthase, involved in methionine de novo synthesis in the chloroplast; methionine…
Bin: 13.1.3.4	amino acid metabolism.synthesis.aspartate family.methionine
	Id: seq_2110
	(at4g34840 : 122.0) Phosphorylase superfamily protein; CONTAINS InterPro DOMAIN/s: Nucleoside phosphorylase (InterPro:IPR000845), Nucleoside phosphorylase, family 1 (InterPro:IPR018017); BEST Arabidopsis thaliana protein match is: methylthioadenosine nucleosidase 1 (TAIR:AT4G38800.1); Has 2832 Blast hits to 2832 proteins in 1251 species: Archae - 0; Bacteria - 2704; Metazoa - 0; Fungi - 0; Plants…
Bin: 13.1.3.2.1	amino acid metabolism.synthesis.aspartate family.threonine.threonine synthase
	Id: seq_2101
	(at4g29840 : 595.0) threonine synthase; METHIONINE OVER-ACCUMULATOR 2 (MTO2); FUNCTIONS IN: threonine synthase activity; INVOLVED IN: threonine biosynthetic process, metabolic process, cellular amino acid metabolic process; LOCATED IN: chloroplast; EXPRESSED IN: 24 plant structures; EXPRESSED DURING: 16 growth stages; CONTAINS InterPro DOMAIN/s: Threonine synthase (InterPro:IPR004450), Pyridoxal …
Bin: 13.1.3.2.1	amino acid metabolism.synthesis.aspartate family.threonine.threonine synthase
	Id: seq_2178
	(q9mt28|thrc_soltu : 224.0) Threonine synthase, chloroplast precursor (EC 4.2.3.1) (TS) - Solanum tuberosum (Potato) & (at1g72810 : 211.0) Pyridoxal-5'-phosphate-dependent enzyme family protein; FUNCTIONS IN: pyridoxal phosphate binding, catalytic activity, threonine synthase activity; INVOLVED IN: threonine biosynthetic process, metabolic process, cellular amino acid metabolic process; LOCATED I…
Bin: 13.1.3.1.1	amino acid metabolism.synthesis.aspartate family.asparagine.asparagine synthetase
	Id: seq_1131
	(at5g10240 : 1023.0) Encodes asparagine synthetase (ASN3).; asparagine synthetase 3 (ASN3); FUNCTIONS IN: asparagine synthase (glutamine-hydrolyzing) activity; INVOLVED IN: asparagine biosynthetic process; EXPRESSED IN: 23 plant structures; EXPRESSED DURING: 13 growth stages; CONTAINS InterPro DOMAIN/s: Rossmann-like alpha/beta/alpha sandwich fold (InterPro:IPR014729), Asparagine synthase (InterP…
Bin: 13.1.2.3.23	amino acid metabolism.synthesis.glutamate family.arginine.argininosuccinate lyase
	Id: seq_1241
	(at5g10920 : 82.0) L-Aspartase-like family protein; FUNCTIONS IN: argininosuccinate lyase activity, catalytic activity; INVOLVED IN: arginine biosynthetic process via ornithine, arginine biosynthetic process; LOCATED IN: chloroplast, chloroplast stroma; EXPRESSED IN: 23 plant structures; EXPRESSED DURING: 13 growth stages; CONTAINS InterPro DOMAIN/s: Argininosuccinate lyase (InterPro:IPR009049), …
Bin: 13.1.2.3.23	amino acid metabolism.synthesis.glutamate family.arginine.argininosuccinate lyase
	Id: seq_2054
	(at5g10920 : 197.0) L-Aspartase-like family protein; FUNCTIONS IN: argininosuccinate lyase activity, catalytic activity; INVOLVED IN: arginine biosynthetic process via ornithine, arginine biosynthetic process; LOCATED IN: chloroplast, chloroplast stroma; EXPRESSED IN: 23 plant structures; EXPRESSED DURING: 13 growth stages; CONTAINS InterPro DOMAIN/s: Argininosuccinate lyase (InterPro:IPR009049),…
Bin: 13.1.2.3.22	amino acid metabolism.synthesis.glutamate family.arginine.arginosuccinate synthase
	Id: seq_315
	(at4g24830 : 749.0) arginosuccinate synthase family; FUNCTIONS IN: argininosuccinate synthase activity, ATP binding; INVOLVED IN: arginine biosynthetic process; LOCATED IN: chloroplast; EXPRESSED IN: 24 plant structures; EXPRESSED DURING: 15 growth stages; CONTAINS InterPro DOMAIN/s: Rossmann-like alpha/beta/alpha sandwich fold (InterPro:IPR014729), Argininosuccinate synthase, conserved site (Int…
Bin: 13.1.2.3.21	amino acid metabolism.synthesis.glutamate family.arginine.ornithine carbamoyltransferase
	Id: seq_1455
	(q43814|otc_pea : 566.0) Ornithine carbamoyltransferase, chloroplast precursor (EC 2.1.3.3) (OTCase) (Ornithine transcarbamylase) - Pisum sativum (Garden pea) & (at1g75330 : 549.0) ornithine carbamoyltransferase (OTC); FUNCTIONS IN: amino acid binding, ornithine carbamoyltransferase activity, carboxyl- or carbamoyltransferase activity; INVOLVED IN: cellular amino acid metabolic process; LOCATED I…
Bin: 13.1.2.3.4	amino acid metabolism.synthesis.glutamate family.arginine.acetylornithine aminotransferase
	Id: seq_1174
	(at1g80600 : 645.0) Encodes HopW1-1-Interacting protein 1 (WIN1). Interacts with the P. syringae effector HopW1-1. WIN1 is a putative acetylornithine transaminase. Modulates plant defenses against bacteria. Three WIN proteins are identified so far (WIN1: AT1G80600; WIN2: AT4G31750; WIN3: AT5G13320).; HOPW1-1-interacting 1 (WIN1); FUNCTIONS IN: N2-acetyl-L-ornithine:2-oxoglutarate 5-aminotransfera…
Bin: 13.1.2.3.3	amino acid metabolism.synthesis.glutamate family.arginine.N-Acetylglutamate-5-P reductase
	Id: seq_1518
	(at2g19940 : 614.0) oxidoreductases, acting on the aldehyde or oxo group of donors, NAD or NADP as acceptor;copper ion binding; FUNCTIONS IN: oxidoreductase activity, acting on the aldehyde or oxo group of donors, NAD or NADP as acceptor, copper ion binding; INVOLVED IN: response to cadmium ion, cellular amino acid metabolic process; LOCATED IN: nucleolus, chloroplast, membrane; EXPRESSED IN: 25 …
Bin: 13.1.2.3.2	amino acid metabolism.synthesis.glutamate family.arginine.acetylglutamate kinase
	Id: seq_1358
	(at2g37500 : 609.0) arginine biosynthesis protein ArgJ family; FUNCTIONS IN: glutamate N-acetyltransferase activity; INVOLVED IN: arginine biosynthetic process; LOCATED IN: chloroplast; EXPRESSED IN: 22 plant structures; EXPRESSED DURING: 13 growth stages; CONTAINS InterPro DOMAIN/s: Arginine biosynthesis protein ArgJ (InterPro:IPR002813), Peptidase S58 DmpA/arginine biosynthesis protein ArgJ (In…
Bin: 13.1.2.2.1	amino acid metabolism.synthesis.glutamate family.proline.delta 1-pyrroline-5-carboxylate synthetase
	Id: seq_164
	(o04015|p5cs_actch : 1074.0) Delta 1-pyrroline-5-carboxylate synthetase (P5CS) [Includes: Glutamate 5-kinase (EC 2.7.2.11) (Gamma-glutamyl kinase) (GK); Gamma-glutamyl phosphate reductase (GPR) (EC 1.2.1.41) (Glutamate-5-semialdehyde dehydrogenase) (Glutamyl-gamma- & (at2g39800 : 1040.0) delta1-pyrroline-5-carboxylate synthase 1 (P5CS1); CONTAINS InterPro DOMAIN/s: Glutamate 5-kinase (InterPro:IP…
Bin: 13.1.1.3.11	amino acid metabolism.synthesis.central amino acid metabolism.alanine.alanine-glyoxylate aminotransferase
	Id: seq_384
	(at4g39660 : 563.0) alanine:glyoxylate aminotransferase 2 homolog (AGT2) mRNA,; alanine:glyoxylate aminotransferase 2 (AGT2); FUNCTIONS IN: zinc ion binding, alanine-glyoxylate transaminase activity; INVOLVED IN: response to cadmium ion; LOCATED IN: mitochondrion, plasma membrane, membrane; EXPRESSED IN: 25 plant structures; EXPRESSED DURING: 14 growth stages; CONTAINS InterPro DOMAIN/s: Pyridoxa…
Bin: 13.1.1.3.11	amino acid metabolism.synthesis.central amino acid metabolism.alanine.alanine-glyoxylate aminotransferase
	Id: seq_1311
	(at2g38400 : 743.0) alanine:glyoxylate aminotransferase 2 homolog (AGT3) mRNA,; alanine:glyoxylate aminotransferase 3 (AGT3); FUNCTIONS IN: pyridoxal phosphate binding, transaminase activity, catalytic activity, alanine-glyoxylate transaminase activity; EXPRESSED IN: 22 plant structures; EXPRESSED DURING: 15 growth stages; CONTAINS InterPro DOMAIN/s: Pyridoxal phosphate-dependent transferase, maj…
Bin: 13.1.1.3.1	amino acid metabolism.synthesis.central amino acid metabolism.alanine.alanine aminotransferase
	Id: seq_231
	(at1g70580 : 905.0) Encodes a protein with glyoxylate aminotransferase activity. It can act on a number of different small substrates and amino acids in vitro.; alanine-2-oxoglutarate aminotransferase 2 (AOAT2); FUNCTIONS IN: glycine:2-oxoglutarate aminotransferase activity, L-alanine:2-oxoglutarate aminotransferase activity, alanine-glyoxylate transaminase activity; INVOLVED IN: photorespiration…
Bin: 13.1.1.3.1	amino acid metabolism.synthesis.central amino acid metabolism.alanine.alanine aminotransferase
	Id: seq_730
	(at1g72330 : 858.0) Encodes for alanine aminotransferase ALAAT2.; alanine aminotransferase 2 (ALAAT2); FUNCTIONS IN: copper ion binding, L-alanine:2-oxoglutarate aminotransferase activity; INVOLVED IN: biosynthetic process; CONTAINS InterPro DOMAIN/s: 1-aminocyclopropane-1-carboxylate synthase (InterPro:IPR001176), Pyridoxal phosphate-dependent transferase, major domain (InterPro:IPR015424), Amin…
Bin: 13.1.1.2.1	amino acid metabolism.synthesis.central amino acid metabolism.aspartate.aspartate aminotransferase
	Id: seq_71
	(at2g22250 : 616.0) Encodes a prokaryotic-type plastidic aspartate aminotransferase with glutamate/aspartate-prephenate aminotransferase (PAT) activity.; aspartate aminotransferase (AAT); FUNCTIONS IN: L-aspartate:2-oxoglutarate aminotransferase activity, transferase activity, transferring nitrogenous groups, pyridoxal phosphate binding, catalytic activity; INVOLVED IN: embryo development ending …
Bin: 13.1.1.2.1	amino acid metabolism.synthesis.central amino acid metabolism.aspartate.aspartate aminotransferase
	Id: seq_83
	(at4g31990 : 785.0) Encodes a plastid-localized aspartate aminotransferase. Does not display any PAT (glutamate/aspartate-prephenate aminotransferase) activity even in the presence of a high concentration of prephenate.; aspartate aminotransferase 5 (ASP5); CONTAINS InterPro DOMAIN/s: Aminotransferase, class I/classII (InterPro:IPR004839), Pyridoxal phosphate-dependent transferase, major domain (…
Bin: 13.1.1.2.1	amino acid metabolism.synthesis.central amino acid metabolism.aspartate.aspartate aminotransferase
	Id: seq_207
	(at5g11520 : 765.0) Encodes the chloroplastic isozyme of aspartate aminotransferase. Involved in aspartate biosynthesis and nitrogen metabolism. mRNA is expressed in senescing leaves.; aspartate aminotransferase 3 (ASP3); FUNCTIONS IN: L-aspartate:2-oxoglutarate aminotransferase activity; INVOLVED IN: leaf senescence, nitrogen compound metabolic process; LOCATED IN: peroxisome, plastid, membrane;…
Bin: 13.1.1.2.1	amino acid metabolism.synthesis.central amino acid metabolism.aspartate.aspartate aminotransferase
	Id: seq_1086
	(at5g11520 : 445.0) Encodes the chloroplastic isozyme of aspartate aminotransferase. Involved in aspartate biosynthesis and nitrogen metabolism. mRNA is expressed in senescing leaves.; aspartate aminotransferase 3 (ASP3); FUNCTIONS IN: L-aspartate:2-oxoglutarate aminotransferase activity; INVOLVED IN: leaf senescence, nitrogen compound metabolic process; LOCATED IN: peroxisome, plastid, membrane;…
Bin: 13.1.1.2.1	amino acid metabolism.synthesis.central amino acid metabolism.aspartate.aspartate aminotransferase
	Id: seq_2129
	(at2g30970 : 396.0) ASPARTATE AMINOTRANSFERASE 1; aspartate aminotransferase 1 (ASP1); FUNCTIONS IN: L-aspartate:2-oxoglutarate aminotransferase activity, copper ion binding; LOCATED IN: mitochondrion; EXPRESSED IN: 23 plant structures; EXPRESSED DURING: 13 growth stages; CONTAINS InterPro DOMAIN/s: Aminotransferase, class I/classII (InterPro:IPR004839), Pyridoxal phosphate-dependent transferase,…
Bin: 13.1.1.1.2	amino acid metabolism.synthesis.central amino acid metabolism.GABA.GABA transaminase
	Id: seq_1034
	(at3g22200 : 204.0) Genetically redundant with POP3;mediates pollen tube guidance. Double mutants are self sterile; gamma-aminobutyrate transaminase subunit precursor; nuclear gene for mitochondrial product. Encodes gamma-aminobutyrate transaminase that uses pyruvate instead of alpha-ketoglutarate as cosubstrate. Mutations in POP2/HER1 render roots resistant to the inhibitory growth effects of th…
Bin: 13.1.1.1.2	amino acid metabolism.synthesis.central amino acid metabolism.GABA.GABA transaminase
	Id: seq_1471
	(at3g22200 : 293.0) Genetically redundant with POP3;mediates pollen tube guidance. Double mutants are self sterile; gamma-aminobutyrate transaminase subunit precursor; nuclear gene for mitochondrial product. Encodes gamma-aminobutyrate transaminase that uses pyruvate instead of alpha-ketoglutarate as cosubstrate. Mutations in POP2/HER1 render roots resistant to the inhibitory growth effects of th…
Bin: 13.1.1.1.2	amino acid metabolism.synthesis.central amino acid metabolism.GABA.GABA transaminase
	Id: seq_1587
	(at3g22200 : 175.0) Genetically redundant with POP3;mediates pollen tube guidance. Double mutants are self sterile; gamma-aminobutyrate transaminase subunit precursor; nuclear gene for mitochondrial product. Encodes gamma-aminobutyrate transaminase that uses pyruvate instead of alpha-ketoglutarate as cosubstrate. Mutations in POP2/HER1 render roots resistant to the inhibitory growth effects of th…
Bin: 13.1.1.1.2	amino acid metabolism.synthesis.central amino acid metabolism.GABA.GABA transaminase
	Id: seq_2008
	(at3g22200 : 298.0) Genetically redundant with POP3;mediates pollen tube guidance. Double mutants are self sterile; gamma-aminobutyrate transaminase subunit precursor; nuclear gene for mitochondrial product. Encodes gamma-aminobutyrate transaminase that uses pyruvate instead of alpha-ketoglutarate as cosubstrate. Mutations in POP2/HER1 render roots resistant to the inhibitory growth effects of th…
Bin: 13.1.1.1.1	amino acid metabolism.synthesis.central amino acid metabolism.GABA.Glutamate decarboxylase
	Id: seq_146
	(at3g17760 : 783.0) glutamate decarboxylase 5 (GAD5); FUNCTIONS IN: calmodulin binding; INVOLVED IN: carboxylic acid metabolic process, glutamate metabolic process; LOCATED IN: cellular_component unknown; CONTAINS InterPro DOMAIN/s: Pyridoxal phosphate-dependent transferase, major domain (InterPro:IPR015424), Pyridoxal phosphate-dependent decarboxylase (InterPro:IPR002129), Glutamate decarboxylas…
14. S-assimilation
Bin: 14.3	S-assimilation.sulfite redox
	Id: seq_1091
	(at5g04590 : 177.0) A.thaliana gene encoding sulfite reductase.; sulfite reductase (SIR); FUNCTIONS IN: sulfite reductase activity, sulfite reductase (ferredoxin) activity, copper ion binding; INVOLVED IN: sulfate reduction, response to salt stress, response to cold; LOCATED IN: in 7 components; EXPRESSED IN: 25 plant structures; EXPRESSED DURING: 15 growth stages; CONTAINS InterPro DOMAIN/s: Sul…
Bin: 14.3	S-assimilation.sulfite redox
	Id: seq_1791
	(at5g04590 : 453.0) A.thaliana gene encoding sulfite reductase.; sulfite reductase (SIR); FUNCTIONS IN: sulfite reductase activity, sulfite reductase (ferredoxin) activity, copper ion binding; INVOLVED IN: sulfate reduction, response to salt stress, response to cold; LOCATED IN: in 7 components; EXPRESSED IN: 25 plant structures; EXPRESSED DURING: 15 growth stages; CONTAINS InterPro DOMAIN/s: Sul…
Bin: 14.3	S-assimilation.sulfite redox
	Id: seq_2020
	(at5g04590 : 119.0) A.thaliana gene encoding sulfite reductase.; sulfite reductase (SIR); FUNCTIONS IN: sulfite reductase activity, sulfite reductase (ferredoxin) activity, copper ion binding; INVOLVED IN: sulfate reduction, response to salt stress, response to cold; LOCATED IN: in 7 components; EXPRESSED IN: 25 plant structures; EXPRESSED DURING: 15 growth stages; CONTAINS InterPro DOMAIN/s: Sul…
Bin: 14.1	S-assimilation.ATPS
	Id: seq_434
	(at3g22890 : 733.0) encodes ATP sulfurylase, the first enzyme in the sulfate assimilation pathway of Arabidopsis.; ATP sulfurylase 1 (APS1); FUNCTIONS IN: sulfate adenylyltransferase (ATP) activity; INVOLVED IN: response to cadmium ion, response to salt stress; LOCATED IN: chloroplast, plasma membrane, chloroplast stroma; EXPRESSED IN: 24 plant structures; EXPRESSED DURING: 15 growth stages; CONT…
15. metal handling
Bin: 15.3	metal handling.regulation
	Id: seq_1659
	(at4g14716 : 143.0) acireductone dioxygenase 1 (ARD1); FUNCTIONS IN: acireductone dioxygenase [iron(II)-requiring] activity, metal ion binding; INVOLVED IN: L-methionine salvage from methylthioadenosine, oxidation reduction; LOCATED IN: cellular_component unknown; EXPRESSED IN: male gametophyte, cultured cell, pollen tube; EXPRESSED DURING: L mature pollen stage, M germinated pollen stage; CONTAI…
Bin: 15.3	metal handling.regulation
	Id: seq_1969
	(at4g14710 : 135.0) ATARD2; FUNCTIONS IN: acireductone dioxygenase [iron(II)-requiring] activity, metal ion binding; INVOLVED IN: oxidation reduction, L-methionine salvage from methylthioadenosine; LOCATED IN: cellular_component unknown; CONTAINS InterPro DOMAIN/s: Cupin, RmlC-type (InterPro:IPR011051), Acireductone dioxygenase, ARD (InterPro:IPR004313), RmlC-like jelly roll fold (InterPro:IPR014…
Bin: 15.2	metal handling.binding, chelation and storage
	Id: seq_224
	(q96551|metk_catro : 420.0) S-adenosylmethionine synthetase 1 (EC 2.5.1.6) (Methionine adenosyltransferase 1) (AdoMet synthetase 1) - Catharanthus roseus (Rosy periwinkle) (Madagascar periwinkle) & (at4g01850 : 409.0) S-adenosylmethionine synthetase 2 (SAM-2); FUNCTIONS IN: methionine adenosyltransferase activity; INVOLVED IN: one-carbon metabolic process, S-adenosylmethionine biosynthetic proces…
Bin: 15.2	metal handling.binding, chelation and storage
	Id: seq_279
	(q96551|metk_catro : 752.0) S-adenosylmethionine synthetase 1 (EC 2.5.1.6) (Methionine adenosyltransferase 1) (AdoMet synthetase 1) - Catharanthus roseus (Rosy periwinkle) (Madagascar periwinkle) & (at1g02500 : 730.0) encodes a S-adenosylmethionine synthetase. SAM1 is regulated by protein S-nitrosylation. The covalent binding of nitric oxide (NO) to the Cys114 residue inhibits the enzyme activity…
Bin: 15.2	metal handling.binding, chelation and storage
	Id: seq_751
	(q96552|metl_catro : 748.0) S-adenosylmethionine synthetase 2 (EC 2.5.1.6) (Methionine adenosyltransferase 2) (AdoMet synthetase 2) - Catharanthus roseus (Rosy periwinkle) (Madagascar periwinkle) & (at3g17390 : 731.0) S-adenosylmethionine synthetase; METHIONINE OVER-ACCUMULATOR 3 (MTO3); FUNCTIONS IN: methionine adenosyltransferase activity; INVOLVED IN: lignin biosynthetic process, response to c…
Bin: 15.2	metal handling.binding, chelation and storage
	Id: seq_806
	(q948p6|fri3_soybn : 307.0) Ferritin-3, chloroplast precursor (EC 1.16.3.1) (SFerH-3) - Glycine max (Soybean) & (at2g40300 : 286.0) Encodes FERRITIN 4, AtFER4. Ferritins are a class of 24-mer multi-meric proteins found in all kingdoms of life. Function as the main iron store in mammals. Evidence suggests that Arabidopsis ferritins are essential to protect cells against oxidative damage, but they …
Bin: 15.2	metal handling.binding, chelation and storage
	Id: seq_884
	(at1g66240 : 97.8) homolog of anti-oxidant 1 (ATX1); LOCATED IN: endomembrane system; EXPRESSED IN: 22 plant structures; EXPRESSED DURING: 13 growth stages. & (reliability: 195.6) & (original description: no original description)
Bin: 15.2	metal handling.binding, chelation and storage
	Id: seq_1051
	(at2g36880 : 729.0) methionine adenosyltransferase 3 (MAT3); FUNCTIONS IN: methionine adenosyltransferase activity; INVOLVED IN: one-carbon metabolic process, S-adenosylmethionine biosynthetic process; LOCATED IN: plasma membrane; EXPRESSED IN: 25 plant structures; EXPRESSED DURING: 16 growth stages; CONTAINS InterPro DOMAIN/s: S-adenosylmethionine synthetase (InterPro:IPR002133), S-adenosylmethi…
Bin: 15.2	metal handling.binding, chelation and storage
	Id: seq_1559
	(at2g33740 : 140.0) encodes a copper binding protein that forms tetramers in vitro. Gene is expressed in all tissues examined and protein is localized to the chloroplast.; CUTA; FUNCTIONS IN: copper ion binding; INVOLVED IN: response to metal ion; LOCATED IN: chloroplast; EXPRESSED IN: 22 plant structures; EXPRESSED DURING: 13 growth stages; CONTAINS InterPro DOMAIN/s: Divalent ion tolerance prot…
Bin: 15.2	metal handling.binding, chelation and storage
	Id: seq_1886
	(at4g38580 : 84.0) putative farnesylated protein (At4g38580) mRNA, complete; farnesylated protein 6 (FP6); FUNCTIONS IN: metal ion binding; INVOLVED IN: heat acclimation; LOCATED IN: plasma membrane; EXPRESSED IN: 23 plant structures; EXPRESSED DURING: 13 growth stages; CONTAINS InterPro DOMAIN/s: Heavy metal transport/detoxification protein (InterPro:IPR006121); BEST Arabidopsis thaliana protein…
Bin: 15.2	metal handling.binding, chelation and storage
	Id: seq_2061
	(at3g62020 : 144.0) germin-like protein (GLP10); germin-like protein 10 (GLP10); FUNCTIONS IN: manganese ion binding, nutrient reservoir activity; INVOLVED IN: biological_process unknown; LOCATED IN: cell wall, plant-type cell wall; EXPRESSED IN: 19 plant structures; EXPRESSED DURING: 10 growth stages; CONTAINS InterPro DOMAIN/s: Cupin, RmlC-type (InterPro:IPR011051), Cupin 1 (InterPro:IPR006045)…
Bin: 15	metal handling
	Id: seq_381
	(gnl|cdd|69230 : 855.0) no description available & (at4g14030 : 852.0) selenium-binding protein 1 (SBP1); FUNCTIONS IN: selenium binding; INVOLVED IN: response to cadmium ion, response to hydrogen peroxide, cellular response to selenium ion, sulfate assimilation; LOCATED IN: cellular_component unknown; EXPRESSED IN: guard cell; CONTAINS InterPro DOMAIN/s: Cytochrome cd1-nitrite reductase-like, C-…
Bin: 15	metal handling
	Id: seq_900
	(at5g19140 : 322.0) AILP1; FUNCTIONS IN: molecular_function unknown; INVOLVED IN: response to auxin stimulus, response to aluminum ion; LOCATED IN: plasma membrane; EXPRESSED IN: 23 plant structures; EXPRESSED DURING: 13 growth stages; BEST Arabidopsis thaliana protein match is: Aluminium induced protein with YGL and LRDR motifs (TAIR:AT5G43830.1); Has 840 Blast hits to 840 proteins in 265 specie…
16. secondary metabolism
Bin: 16.10	secondary metabolism.simple phenols
	Id: seq_493
	(at5g09360 : 570.0) putative laccase, a member of laccase family of genes (17 members in Arabidopsis).; laccase 14 (LAC14); FUNCTIONS IN: laccase activity; INVOLVED IN: oxidation reduction, lignin catabolic process; LOCATED IN: endomembrane system, apoplast; EXPRESSED IN: central cell, fruit; CONTAINS InterPro DOMAIN/s: Multicopper oxidase, type 3 (InterPro:IPR011707), Laccase (InterPro:IPR017761…
Bin: 16.10	secondary metabolism.simple phenols
	Id: seq_978
	(at5g09360 : 564.0) putative laccase, a member of laccase family of genes (17 members in Arabidopsis).; laccase 14 (LAC14); FUNCTIONS IN: laccase activity; INVOLVED IN: oxidation reduction, lignin catabolic process; LOCATED IN: endomembrane system, apoplast; EXPRESSED IN: central cell, fruit; CONTAINS InterPro DOMAIN/s: Multicopper oxidase, type 3 (InterPro:IPR011707), Laccase (InterPro:IPR017761…
Bin: 16.10	secondary metabolism.simple phenols
	Id: seq_1360
	(at5g09360 : 246.0) putative laccase, a member of laccase family of genes (17 members in Arabidopsis).; laccase 14 (LAC14); FUNCTIONS IN: laccase activity; INVOLVED IN: oxidation reduction, lignin catabolic process; LOCATED IN: endomembrane system, apoplast; EXPRESSED IN: central cell, fruit; CONTAINS InterPro DOMAIN/s: Multicopper oxidase, type 3 (InterPro:IPR011707), Laccase (InterPro:IPR017761…
Bin: 16.10	secondary metabolism.simple phenols
	Id: seq_1595
	(at5g09360 : 348.0) putative laccase, a member of laccase family of genes (17 members in Arabidopsis).; laccase 14 (LAC14); FUNCTIONS IN: laccase activity; INVOLVED IN: oxidation reduction, lignin catabolic process; LOCATED IN: endomembrane system, apoplast; EXPRESSED IN: central cell, fruit; CONTAINS InterPro DOMAIN/s: Multicopper oxidase, type 3 (InterPro:IPR011707), Laccase (InterPro:IPR017761…
Bin: 16.10	secondary metabolism.simple phenols
	Id: seq_1700
	(gnl|cdd|36477 : 153.0) no description available & (at5g09360 : 127.0) putative laccase, a member of laccase family of genes (17 members in Arabidopsis).; laccase 14 (LAC14); FUNCTIONS IN: laccase activity; INVOLVED IN: oxidation reduction, lignin catabolic process; LOCATED IN: endomembrane system, apoplast; EXPRESSED IN: central cell, fruit; CONTAINS InterPro DOMAIN/s: Multicopper oxidase, type …
Bin: 16.10	secondary metabolism.simple phenols
	Id: seq_1935
	(at2g30210 : 120.0) putative laccase, a member of laccase family of genes (17 members in Arabidopsis).; laccase 3 (LAC3); FUNCTIONS IN: laccase activity; INVOLVED IN: oxidation reduction, lignin catabolic process; LOCATED IN: endomembrane system, apoplast; EXPRESSED IN: hypocotyl, fruit, root, seed; EXPRESSED DURING: E expanded cotyledon stage; CONTAINS InterPro DOMAIN/s: Multicopper oxidase, typ…
Bin: 16.8.5.1	secondary metabolism.flavonoids.isoflavones.isoflavone reductase
	Id: seq_42
	(at1g75280 : 159.0) isoflavone reductase, putative, identical to SP:P52577 Isoflavone reductase homolog P3 (EC 1.3.1.-) {Arabidopsis thaliana}; contains Pfam profile PF02716: isoflavone reductase. Involved in response to oxidative stress.; NmrA-like negative transcriptional regulator family protein; FUNCTIONS IN: binding, catalytic activity; INVOLVED IN: response to oxidative stress, response to …
Bin: 16.8.5.1	secondary metabolism.flavonoids.isoflavones.isoflavone reductase
	Id: seq_600
	(p52579|ifrh_tobac : 256.0) Isoflavone reductase homolog A622 (EC 1.3.1.-) - Nicotiana tabacum (Common tobacco) & (at1g75290 : 236.0) encodes a protein whose sequence is similar to an isoflavone reductase; NAD(P)-binding Rossmann-fold superfamily protein; FUNCTIONS IN: oxidoreductase activity, acting on NADH or NADPH; INVOLVED IN: metabolic process; LOCATED IN: cellular_component unknown; EXPRESS…
Bin: 16.8.5.1	secondary metabolism.flavonoids.isoflavones.isoflavone reductase
	Id: seq_1474
	(p52579|ifrh_tobac : 384.0) Isoflavone reductase homolog A622 (EC 1.3.1.-) - Nicotiana tabacum (Common tobacco) & (at1g75280 : 367.0) isoflavone reductase, putative, identical to SP:P52577 Isoflavone reductase homolog P3 (EC 1.3.1.-) {Arabidopsis thaliana}; contains Pfam profile PF02716: isoflavone reductase. Involved in response to oxidative stress.; NmrA-like negative transcriptional regulator …
Bin: 16.8.5.1	secondary metabolism.flavonoids.isoflavones.isoflavone reductase
	Id: seq_1694
	(at4g39230 : 251.0) encodes a protein whose sequence is similar to phenylcoumaran benzylic ether reductase (PCBER), which catalyzes NADPH-dependent reduction of 8-5' linked lignans such as dehydrodiconiferyl alcohol to give isodihydrodehydrodiconiferyl alcohol.; NmrA-like negative transcriptional regulator family protein; FUNCTIONS IN: phenylcoumaran benzylic ether reductase activity; INVOLVED IN…
Bin: 16.8.5.1	secondary metabolism.flavonoids.isoflavones.isoflavone reductase
	Id: seq_1760
	(at4g39230 : 286.0) encodes a protein whose sequence is similar to phenylcoumaran benzylic ether reductase (PCBER), which catalyzes NADPH-dependent reduction of 8-5' linked lignans such as dehydrodiconiferyl alcohol to give isodihydrodehydrodiconiferyl alcohol.; NmrA-like negative transcriptional regulator family protein; FUNCTIONS IN: phenylcoumaran benzylic ether reductase activity; INVOLVED IN…
Bin: 16.8.5.1	secondary metabolism.flavonoids.isoflavones.isoflavone reductase
	Id: seq_1814
	(at1g75290 : 125.0) encodes a protein whose sequence is similar to an isoflavone reductase; NAD(P)-binding Rossmann-fold superfamily protein; FUNCTIONS IN: oxidoreductase activity, acting on NADH or NADPH; INVOLVED IN: metabolic process; LOCATED IN: cellular_component unknown; EXPRESSED IN: sepal, male gametophyte, flower, carpel; EXPRESSED DURING: 4 anthesis, petal differentiation and expansion …
Bin: 16.8.4.2	secondary metabolism.flavonoids.flavonols.flavonol 3-O-glycosyltransferase
	Id: seq_877
	(gnl|cdd|36406 : 172.0) no description available & (at2g36780 : 154.0) UDP-Glycosyltransferase superfamily protein; FUNCTIONS IN: UDP-glycosyltransferase activity, transferase activity, transferring glycosyl groups; INVOLVED IN: metabolic process; LOCATED IN: cellular_component unknown; CONTAINS InterPro DOMAIN/s: UDP-glucuronosyl/UDP-glucosyltransferase (InterPro:IPR002213); BEST Arabidopsis tha…
Bin: 16.8.4.2	secondary metabolism.flavonoids.flavonols.flavonol 3-O-glycosyltransferase
	Id: seq_1333
	(at4g34131 : 397.0) UDP-glucosyl transferase 73B3 (UGT73B3); FUNCTIONS IN: transferase activity, transferring hexosyl groups, quercetin 3-O-glucosyltransferase activity, UDP-glycosyltransferase activity, UDP-glucosyltransferase activity; INVOLVED IN: response to cyclopentenone, response to other organism; LOCATED IN: endomembrane system; CONTAINS InterPro DOMAIN/s: UDP-glucuronosyl/UDP-glucosyltr…
Bin: 16.8.4.2	secondary metabolism.flavonoids.flavonols.flavonol 3-O-glycosyltransferase
	Id: seq_2074
	(at2g15490 : 150.0) UDP-glycosyltransferase 73B4 (UGT73B4); FUNCTIONS IN: quercetin 3-O-glucosyltransferase activity, UDP-glycosyltransferase activity, quercetin 7-O-glucosyltransferase activity, UDP-glucosyltransferase activity, transferase activity, transferring glycosyl groups; INVOLVED IN: response to other organism; LOCATED IN: endomembrane system; EXPRESSED IN: root; CONTAINS InterPro DOMAI…
Bin: 16.8.4	secondary metabolism.flavonoids.flavonols
	Id: seq_472
	(at1g17020 : 424.0) Encodes a novel member of the Fe(II)/ascorbate oxidase gene family; senescence-related gene.; senescence-related gene 1 (SRG1); CONTAINS InterPro DOMAIN/s: Oxoglutarate/iron-dependent oxygenase (InterPro:IPR005123); BEST Arabidopsis thaliana protein match is: 2-oxoglutarate (2OG) and Fe(II)-dependent oxygenase superfamily protein (TAIR:AT1G17010.1); Has 8560 Blast hits to 8517…
Bin: 16.8.4	secondary metabolism.flavonoids.flavonols
	Id: seq_1235
	(at1g17020 : 394.0) Encodes a novel member of the Fe(II)/ascorbate oxidase gene family; senescence-related gene.; senescence-related gene 1 (SRG1); CONTAINS InterPro DOMAIN/s: Oxoglutarate/iron-dependent oxygenase (InterPro:IPR005123); BEST Arabidopsis thaliana protein match is: 2-oxoglutarate (2OG) and Fe(II)-dependent oxygenase superfamily protein (TAIR:AT1G17010.1); Has 8560 Blast hits to 8517…
Bin: 16.8.4	secondary metabolism.flavonoids.flavonols
	Id: seq_1333
	(at4g34131 : 397.0) UDP-glucosyl transferase 73B3 (UGT73B3); FUNCTIONS IN: transferase activity, transferring hexosyl groups, quercetin 3-O-glucosyltransferase activity, UDP-glycosyltransferase activity, UDP-glucosyltransferase activity; INVOLVED IN: response to cyclopentenone, response to other organism; LOCATED IN: endomembrane system; CONTAINS InterPro DOMAIN/s: UDP-glucuronosyl/UDP-glucosyltr…
Bin: 16.8.4	secondary metabolism.flavonoids.flavonols
	Id: seq_2074
	(at2g15490 : 150.0) UDP-glycosyltransferase 73B4 (UGT73B4); FUNCTIONS IN: quercetin 3-O-glucosyltransferase activity, UDP-glycosyltransferase activity, quercetin 7-O-glucosyltransferase activity, UDP-glucosyltransferase activity, transferase activity, transferring glycosyl groups; INVOLVED IN: response to other organism; LOCATED IN: endomembrane system; EXPRESSED IN: root; CONTAINS InterPro DOMAI…
Bin: 16.8.3.2	secondary metabolism.flavonoids.dihydroflavonols.flavanone 3-hydroxylase
	Id: seq_1118
	(p41090|fl3h_vitvi : 625.0) Naringenin,2-oxoglutarate 3-dioxygenase (EC 1.14.11.9) (Flavonone-3-hydroxylase) (F3H) (FHT) - Vitis vinifera (Grape) & (at3g51240 : 620.0) Encodes flavanone 3-hydroxylase that is coordinately expressed with chalcone synthase and chalcone isomerases. Regulates flavonoid biosynthesis.; flavanone 3-hydroxylase (F3H); CONTAINS InterPro DOMAIN/s: Oxoglutarate/iron-dependen…
Bin: 16.8.3.1	secondary metabolism.flavonoids.dihydroflavonols.dihydroflavonol 4-reductase
	Id: seq_856
	(p51110|dfra_vitvi : 585.0) Dihydroflavonol-4-reductase (EC 1.1.1.219) (DFR) (Dihydrokaempferol 4-reductase) - Vitis vinifera (Grape) & (at5g42800 : 535.0) dihydroflavonol reductase. Catalyzes the conversion of dihydroquercetin to leucocyanidin in the biosynthesis of anthocyanins.; dihydroflavonol 4-reductase (DFR); CONTAINS InterPro DOMAIN/s: NAD-dependent epimerase/dehydratase (InterPro:IPR0015…
Bin: 16.8.3	secondary metabolism.flavonoids.dihydroflavonols
	Id: seq_472
	(at1g17020 : 424.0) Encodes a novel member of the Fe(II)/ascorbate oxidase gene family; senescence-related gene.; senescence-related gene 1 (SRG1); CONTAINS InterPro DOMAIN/s: Oxoglutarate/iron-dependent oxygenase (InterPro:IPR005123); BEST Arabidopsis thaliana protein match is: 2-oxoglutarate (2OG) and Fe(II)-dependent oxygenase superfamily protein (TAIR:AT1G17010.1); Has 8560 Blast hits to 8517…
Bin: 16.8.3	secondary metabolism.flavonoids.dihydroflavonols
	Id: seq_1235
	(at1g17020 : 394.0) Encodes a novel member of the Fe(II)/ascorbate oxidase gene family; senescence-related gene.; senescence-related gene 1 (SRG1); CONTAINS InterPro DOMAIN/s: Oxoglutarate/iron-dependent oxygenase (InterPro:IPR005123); BEST Arabidopsis thaliana protein match is: 2-oxoglutarate (2OG) and Fe(II)-dependent oxygenase superfamily protein (TAIR:AT1G17010.1); Has 8560 Blast hits to 8517…
Bin: 16.8.2.2	secondary metabolism.flavonoids.chalcones.chalcone isomerase
	Id: seq_1512
	(gnl|cdd|66148 : 327.0) no description available & (p51117|cfi_vitvi : 291.0) Chalcone--flavonone isomerase (EC 5.5.1.6) (Chalcone isomerase) - Vitis vinifera (Grape) & (at3g55120 : 266.0) Catalyzes the conversion of chalcones into flavanones. Required for the accumulation of purple anthocyanins in leaves and stems.; TRANSPARENT TESTA 5 (TT5); FUNCTIONS IN: chalcone isomerase activity; INVOLVED I…
Bin: 16.8.2.1	secondary metabolism.flavonoids.chalcones.naringenin-chalcone synthase
	Id: seq_1365
	(p51075|chsy_betve : 728.0) Chalcone synthase (EC 2.3.1.74) (Naringenin-chalcone synthase) - Betula verrucosa (White birch) (Betula pendula) & (at5g13930 : 696.0) Encodes chalcone synthase (CHS), a key enzyme involved in the biosynthesis of flavonoids. Required for the accumulation of purple anthocyanins in leaves and stems. Also involved in the regulation of auxin transport and the modulation of…
Bin: 16.8.2.1	secondary metabolism.flavonoids.chalcones.naringenin-chalcone synthase
	Id: seq_1494
	(q9xj58|chs1_citsi : 521.0) Chalcone synthase 1 (EC 2.3.1.74) (Naringenin-chalcone synthase 1) - Citrus sinensis (Sweet orange) & (at5g13930 : 498.0) Encodes chalcone synthase (CHS), a key enzyme involved in the biosynthesis of flavonoids. Required for the accumulation of purple anthocyanins in leaves and stems. Also involved in the regulation of auxin transport and the modulation of root gravitr…
Bin: 16.8.2	secondary metabolism.flavonoids.chalcones
	Id: seq_496
	(at1g59960 : 380.0) NAD(P)-linked oxidoreductase superfamily protein; FUNCTIONS IN: oxidoreductase activity; INVOLVED IN: response to salt stress; EXPRESSED IN: 21 plant structures; EXPRESSED DURING: 13 growth stages; CONTAINS InterPro DOMAIN/s: Aldo/keto reductase (InterPro:IPR001395), Aldo/keto reductase subgroup (InterPro:IPR020471), Aldo/keto reductase, conserved site (InterPro:IPR018170); BE…
Bin: 16.8.2	secondary metabolism.flavonoids.chalcones
	Id: seq_1192
	(at5g05270 : 124.0) Chalcone-flavanone isomerase family protein; FUNCTIONS IN: intramolecular lyase activity, chalcone isomerase activity; INVOLVED IN: response to karrikin; LOCATED IN: cellular_component unknown; EXPRESSED IN: 20 plant structures; EXPRESSED DURING: 13 growth stages; CONTAINS InterPro DOMAIN/s: Chalcone isomerase, subgroup (InterPro:IPR003466), Chalcone isomerase, 3-layer sandwic…
Bin: 16.8.2	secondary metabolism.flavonoids.chalcones
	Id: seq_1512
	(gnl|cdd|66148 : 327.0) no description available & (p51117|cfi_vitvi : 291.0) Chalcone--flavonone isomerase (EC 5.5.1.6) (Chalcone isomerase) - Vitis vinifera (Grape) & (at3g55120 : 266.0) Catalyzes the conversion of chalcones into flavanones. Required for the accumulation of purple anthocyanins in leaves and stems.; TRANSPARENT TESTA 5 (TT5); FUNCTIONS IN: chalcone isomerase activity; INVOLVED I…
Bin: 16.8.1.1	secondary metabolism.flavonoids.anthocyanins.leucocyanidin dioxygenase
	Id: seq_253
	(p51091|ldox_maldo : 524.0) Leucoanthocyanidin dioxygenase (EC 1.14.11.19) (LDOX) (Leucocyanidin oxygenase) (Leucoanthocyanidin hydroxylase) (Anthocyanidin synthase) - Malus domestica (Apple) (Malus sylvestris) & (at4g22880 : 496.0) encodes leucoanthocyanidin dioxygenase, which is involved in proanthocyanin biosynthesis. Mutant analysis suggests that this gene is also involved in vacuole formatio…
Bin: 16.5.1.3.1	secondary metabolism.sulfur-containing.glucosinolates.degradation.myrosinase
	Id: seq_709
	(gnl|cdd|35845 : 602.0) no description available & (gnl|cdd|84629 : 476.0) no description available & (at2g44480 : 419.0) beta glucosidase 17 (BGLU17); FUNCTIONS IN: cation binding, hydrolase activity, hydrolyzing O-glycosyl compounds, catalytic activity; INVOLVED IN: carbohydrate metabolic process; EXPRESSED IN: stem, hypocotyl, sepal, male gametophyte, root; EXPRESSED DURING: 4 anthesis; CONTAI…
Bin: 16.5.1.1.1.5	secondary metabolism.sulfur-containing.glucosinolates.synthesis.aliphatic.methylthioalkylmalate dehydrogenase (MAM-D)
	Id: seq_559
	(at1g31180 : 647.0) The AtIMD3 is one out of 3 genes encoding the enzyme 3-isopropylmalate dehydrogenase involved in leucine biosynthesis in Arabidopsis. Its subcellular location has been targeted to plastids.; isopropylmalate dehydrogenase 3 (IMD3); FUNCTIONS IN: 3-isopropylmalate dehydrogenase activity; INVOLVED IN: leucine biosynthetic process, response to salt stress, metabolic process; LOCAT…
Bin: 16.5.1.1.1.4	secondary metabolism.sulfur-containing.glucosinolates.synthesis.aliphatic.methylthioalkylmalate isomerase small subunit (MAM-IS)
	Id: seq_403
	(at2g43090 : 271.0) Aconitase/3-isopropylmalate dehydratase protein; FUNCTIONS IN: hydro-lyase activity, 3-isopropylmalate dehydratase activity; INVOLVED IN: metabolic process; EXPRESSED IN: 23 plant structures; EXPRESSED DURING: 13 growth stages; CONTAINS InterPro DOMAIN/s: 3-isopropylmalate dehydratase, small subunit-like (InterPro:IPR012305), Aconitase-like core (InterPro:IPR015937), Aconitase…
Bin: 16.5.1.1.1.3	secondary metabolism.sulfur-containing.glucosinolates.synthesis.aliphatic.methylthioalkylmalate isomerase large subunit (MAM-IL)
	Id: seq_1092
	(at4g13430 : 358.0) Encodes methylthioalkylmalate isomerase.; isopropyl malate isomerase large subunit 1 (IIL1); FUNCTIONS IN: lyase activity, intramolecular transferase activity, transferring hydroxy groups; INVOLVED IN: glucosinolate biosynthetic process, response to cadmium ion, metabolic process; LOCATED IN: chloroplast stroma, chloroplast; EXPRESSED IN: 26 plant structures; EXPRESSED DURING:…
Bin: 16.5.1.1.1.3	secondary metabolism.sulfur-containing.glucosinolates.synthesis.aliphatic.methylthioalkylmalate isomerase large subunit (MAM-IL)
	Id: seq_1644
	(at4g13430 : 241.0) Encodes methylthioalkylmalate isomerase.; isopropyl malate isomerase large subunit 1 (IIL1); FUNCTIONS IN: lyase activity, intramolecular transferase activity, transferring hydroxy groups; INVOLVED IN: glucosinolate biosynthetic process, response to cadmium ion, metabolic process; LOCATED IN: chloroplast stroma, chloroplast; EXPRESSED IN: 26 plant structures; EXPRESSED DURING:…
Bin: 16.5.1.1.1.3	secondary metabolism.sulfur-containing.glucosinolates.synthesis.aliphatic.methylthioalkylmalate isomerase large subunit (MAM-IL)
	Id: seq_1949
	(at4g13430 : 337.0) Encodes methylthioalkylmalate isomerase.; isopropyl malate isomerase large subunit 1 (IIL1); FUNCTIONS IN: lyase activity, intramolecular transferase activity, transferring hydroxy groups; INVOLVED IN: glucosinolate biosynthetic process, response to cadmium ion, metabolic process; LOCATED IN: chloroplast stroma, chloroplast; EXPRESSED IN: 26 plant structures; EXPRESSED DURING:…
Bin: 16.5.1.1.1.1	secondary metabolism.sulfur-containing.glucosinolates.synthesis.aliphatic.branched-chain amino acid aminotransferase (BCAT/MAAT)
	Id: seq_1582
	(at5g65780 : 178.0) encodes a chloroplast branched-chain amino acid aminotransferase, can complement the yeast leu/iso-leu/val auxotrophy mutant; ATBCAT-5; FUNCTIONS IN: branched-chain-amino-acid transaminase activity, catalytic activity; LOCATED IN: mitochondrion, chloroplast; EXPRESSED IN: 23 plant structures; EXPRESSED DURING: 13 growth stages; BEST Arabidopsis thaliana protein match is: littl…
Bin: 16.4.2.1	secondary metabolism.N misc.betaine.betaine-aldehyde dehydrogenase
	Id: seq_367
	(at1g74920 : 259.0) Arabidopsis thaliana similar to betaine aldehyde dehydrogenase; aldehyde dehydrogenase 10A8 (ALDH10A8); FUNCTIONS IN: 3-chloroallyl aldehyde dehydrogenase activity, oxidoreductase activity; INVOLVED IN: oxidation reduction, metabolic process; EXPRESSED IN: 23 plant structures; EXPRESSED DURING: 13 growth stages; CONTAINS InterPro DOMAIN/s: Aldehyde/histidinol dehydrogenase (In…
Bin: 16.4.2.1	secondary metabolism.N misc.betaine.betaine-aldehyde dehydrogenase
	Id: seq_1685
	(at1g74920 : 159.0) Arabidopsis thaliana similar to betaine aldehyde dehydrogenase; aldehyde dehydrogenase 10A8 (ALDH10A8); FUNCTIONS IN: 3-chloroallyl aldehyde dehydrogenase activity, oxidoreductase activity; INVOLVED IN: oxidation reduction, metabolic process; EXPRESSED IN: 23 plant structures; EXPRESSED DURING: 13 growth stages; CONTAINS InterPro DOMAIN/s: Aldehyde/histidinol dehydrogenase (In…
Bin: 16.4.2.1	secondary metabolism.N misc.betaine.betaine-aldehyde dehydrogenase
	Id: seq_2060
	(at3g48170 : 197.0) Arabidopsis thaliana putative betaine aldehyde dehydrogenase; aldehyde dehydrogenase 10A9 (ALDH10A9); FUNCTIONS IN: 3-chloroallyl aldehyde dehydrogenase activity, oxidoreductase activity; INVOLVED IN: oxidation reduction, glycine betaine biosynthetic process from choline, metabolic process; LOCATED IN: peroxisome; EXPRESSED IN: 23 plant structures; EXPRESSED DURING: 13 growth …
Bin: 16.4.1	secondary metabolism.N misc.alkaloid-like
	Id: seq_562
	(at2g29260 : 355.0) NAD(P)-binding Rossmann-fold superfamily protein; FUNCTIONS IN: oxidoreductase activity, binding, catalytic activity; INVOLVED IN: oxidation reduction, metabolic process; LOCATED IN: chloroplast; EXPRESSED IN: 14 plant structures; EXPRESSED DURING: 9 growth stages; CONTAINS InterPro DOMAIN/s: NAD(P)-binding domain (InterPro:IPR016040), Glucose/ribitol dehydrogenase (InterPro:I…
Bin: 16.4.1	secondary metabolism.N misc.alkaloid-like
	Id: seq_726
	(at1g07440 : 376.0) NAD(P)-binding Rossmann-fold superfamily protein; FUNCTIONS IN: oxidoreductase activity, binding, catalytic activity; INVOLVED IN: response to cadmium ion, response to karrikin; LOCATED IN: cellular_component unknown; EXPRESSED IN: 22 plant structures; EXPRESSED DURING: 13 growth stages; CONTAINS InterPro DOMAIN/s: Short-chain dehydrogenase/reductase, conserved site (InterPro:…
Bin: 16.4.1	secondary metabolism.N misc.alkaloid-like
	Id: seq_1079
	(at1g08470 : 611.0) Although this enzyme is predicted to encode a strictosidine synthase (SS), it lacks a conserved catalytic glutamate residue found in active SS enzymes and it is not expected to have SS activity.; strictosidine synthase-like 3 (SSL3); FUNCTIONS IN: strictosidine synthase activity; INVOLVED IN: alkaloid biosynthetic process, biosynthetic process; LOCATED IN: endoplasmic reticulu…
Bin: 16.4.1	secondary metabolism.N misc.alkaloid-like
	Id: seq_1166
	(at3g51430 : 419.0) Although this enzyme is predicted to encode a strictosidine synthase (SS), it lacks a conserved catalytic glutamate residue found in active SS enzymes and it is not expected to have SS activity.; YELLOW-LEAF-SPECIFIC GENE 2 (YLS2); CONTAINS InterPro DOMAIN/s: Strictosidine synthase (InterPro:IPR004141), Strictosidine synthase, conserved region (InterPro:IPR018119), Six-bladed …
Bin: 16.4.1	secondary metabolism.N misc.alkaloid-like
	Id: seq_1497
	(at1g07440 : 315.0) NAD(P)-binding Rossmann-fold superfamily protein; FUNCTIONS IN: oxidoreductase activity, binding, catalytic activity; INVOLVED IN: response to cadmium ion, response to karrikin; LOCATED IN: cellular_component unknown; EXPRESSED IN: 22 plant structures; EXPRESSED DURING: 13 growth stages; CONTAINS InterPro DOMAIN/s: Short-chain dehydrogenase/reductase, conserved site (InterPro:…
Bin: 16.2.1.10	secondary metabolism.phenylpropanoids.lignin biosynthesis.CAD
	Id: seq_771
	(p31657|cadh_popde : 520.0) Cinnamyl alcohol dehydrogenase (EC 1.1.1.195) (CAD) - Populus deltoides (Poplar) & (at4g34230 : 484.0) Encodes a catalytically active cinnamyl alcohol dehydrogenase which uses p-coumaryl aldehyde as a preferred substrate. It can also use sinapyl, caffeyl, coniferyl and d-hydroxyconiferyl aldehydes as substrates.; cinnamyl alcohol dehydrogenase 5 (CAD5); CONTAINS InterP…
Bin: 16.2.1.10	secondary metabolism.phenylpropanoids.lignin biosynthesis.CAD
	Id: seq_800
	(at4g39330 : 541.0) cinnamyl alcohol dehydrogenase 9 (CAD9); FUNCTIONS IN: oxidoreductase activity, zinc ion binding; INVOLVED IN: oxidation reduction; LOCATED IN: apoplast; EXPRESSED IN: 25 plant structures; EXPRESSED DURING: 15 growth stages; CONTAINS InterPro DOMAIN/s: GroES-like (InterPro:IPR011032), Alcohol dehydrogenase GroES-like (InterPro:IPR013154), Alcohol dehydrogenase, zinc-containing…
Bin: 16.2.1.10	secondary metabolism.phenylpropanoids.lignin biosynthesis.CAD
	Id: seq_1859
	(at1g72680 : 129.0) cinnamyl-alcohol dehydrogenase (CAD1); FUNCTIONS IN: oxidoreductase activity, oxidoreductase activity, acting on the CH-OH group of donors, NAD or NADP as acceptor, zinc ion binding, cofactor binding; INVOLVED IN: lignin biosynthetic process; EXPRESSED IN: 25 plant structures; EXPRESSED DURING: 13 growth stages; CONTAINS InterPro DOMAIN/s: GroES-like (InterPro:IPR011032), D-is…
Bin: 16.2.1.9	secondary metabolism.phenylpropanoids.lignin biosynthesis.COMT
	Id: seq_228
	(p28002|comt1_medsa : 648.0) Caffeic acid 3-O-methyltransferase (EC 2.1.1.68) (S-adenosysl-L-methionine:caffeic acid 3-O-methyltransferase) (COMT) (CAOMT) - Medicago sativa (Alfalfa) & (at5g54160 : 593.0) A caffeic acid/5-hydroxyferulic acid O-methyltransferase. Interacts with 14-4-3 proteins in yeast 2 hybrid assay. AtOMT1 (At5g54160) encodes a flavonol 3í-O-methyltransferase that is highly acti…
Bin: 16.2.1.9	secondary metabolism.phenylpropanoids.lignin biosynthesis.COMT
	Id: seq_1475
	(q8w013|comt1_catro : 282.0) Caffeic acid 3-O-methyltransferase (EC 2.1.1.68) (S-adenosysl-L-methionine:caffeic acid 3-O-methyltransferase) (COMT) (CAOMT) - Catharanthus roseus (Rosy periwinkle) (Madagascar periwinkle) & (at5g54160 : 265.0) A caffeic acid/5-hydroxyferulic acid O-methyltransferase. Interacts with 14-4-3 proteins in yeast 2 hybrid assay. AtOMT1 (At5g54160) encodes a flavonol 3í-O-m…
Bin: 16.2.1.7	secondary metabolism.phenylpropanoids.lignin biosynthesis.CCR1
	Id: seq_1439
	(at5g58490 : 234.0) NAD(P)-binding Rossmann-fold superfamily protein; FUNCTIONS IN: coenzyme binding, binding, cinnamoyl-CoA reductase activity, catalytic activity; INVOLVED IN: lignin biosynthetic process, cellular metabolic process, metabolic process; LOCATED IN: cellular_component unknown; EXPRESSED IN: 24 plant structures; EXPRESSED DURING: 15 growth stages; CONTAINS InterPro DOMAIN/s: NAD-de…
Bin: 16.2.1.6	secondary metabolism.phenylpropanoids.lignin biosynthesis.CCoAOMT
	Id: seq_495
	(q40313|camt_medsa : 470.0) Caffeoyl-CoA O-methyltransferase (EC 2.1.1.104) (Trans-caffeoyl-CoA 3-O-methyltransferase) (CCoAMT) (CCoAOMT) - Medicago sativa (Alfalfa) & (at4g34050 : 462.0) caffeoyl coenzyme A O-methyltransferase 1 (CCoAOMT1); FUNCTIONS IN: caffeoyl-CoA O-methyltransferase activity; INVOLVED IN: coumarin biosynthetic process, response to cadmium ion; LOCATED IN: cytosol; EXPRESSED …
Bin: 16.2.1.6	secondary metabolism.phenylpropanoids.lignin biosynthesis.CCoAOMT
	Id: seq_1670
	(at4g26220 : 311.0) S-adenosyl-L-methionine-dependent methyltransferases superfamily protein; FUNCTIONS IN: O-methyltransferase activity; LOCATED IN: cytosol; EXPRESSED IN: shoot, inflorescence meristem, root, flower; EXPRESSED DURING: petal differentiation and expansion stage, seed development stages; CONTAINS InterPro DOMAIN/s: O-methyltransferase, family 3 (InterPro:IPR002935); BEST Arabidopsi…
Bin: 16.2.1.3	secondary metabolism.phenylpropanoids.lignin biosynthesis.4CL
	Id: seq_983
	(o24145|4cl1_tobac : 835.0) 4-coumarate--CoA ligase 1 (EC 6.2.1.12) (4CL 1) (4-coumaroyl-CoA synthase 1) - Nicotiana tabacum (Common tobacco) & (at3g21240 : 749.0) encodes an isoform of 4-coumarate:CoA ligase (4CL), which is involved in the last step of the general phenylpropanoid pathway. The catalytic efficiency was in the following (descending) order: p-coumaric acid, caffeic acid, ferulic aci…
Bin: 16.2.1.1	secondary metabolism.phenylpropanoids.lignin biosynthesis.PAL
	Id: seq_737
	(q9smk9|pal2_cicar : 1250.0) Phenylalanine ammonia-lyase 2 (EC 4.3.1.5) - Cicer arietinum (Chickpea) (Garbanzo) & (at3g53260 : 1221.0) Encodes phenylalanine lyase. Arabidopsis has four PALs: AT2G37040 (PAL1), AT3G53260 (PAL2), AT5G04230 (PAL3) and AT3G10340 (PAL4).; phenylalanine ammonia-lyase 2 (PAL2); FUNCTIONS IN: phenylalanine ammonia-lyase activity; INVOLVED IN: response to oxidative stress,…
Bin: 16.2.1.1	secondary metabolism.phenylpropanoids.lignin biosynthesis.PAL
	Id: seq_1440
	(o23865|pal1_dauca : 1162.0) Phenylalanine ammonia-lyase 1 (EC 4.3.1.5) - Daucus carota (Carrot) & (at2g37040 : 1139.0) Encodes PAL1, a phenylalanine ammonia-lyase. Arabidopsis has four PALs: AT2G37040 (PAL1), AT3G53260 (PAL2), AT5G04230 (PAL3) and AT3G10340 (PAL4).; PHE ammonia lyase 1 (PAL1); FUNCTIONS IN: phenylalanine ammonia-lyase activity; INVOLVED IN: in 10 processes; LOCATED IN: cytoplasm…
Bin: 16.2	secondary metabolism.phenylpropanoids
	Id: seq_659
	(at1g77670 : 707.0) Pyridoxal phosphate (PLP)-dependent transferases superfamily protein; FUNCTIONS IN: 1-aminocyclopropane-1-carboxylate synthase activity, transferase activity, transferring nitrogenous groups, pyridoxal phosphate binding, transaminase activity, catalytic activity; INVOLVED IN: asparagine catabolic process, biosynthetic process, glutamate catabolic process to oxaloacetate, aspar…
Bin: 16.2	secondary metabolism.phenylpropanoids
	Id: seq_1007
	(at2g22570 : 319.0) encodes a nicotinamidase that converts nicotinamide into nicotinic acid. As such the encoded enzyme is involved in the pyridine nucleotide salvage pathway which may be connected to the de novo NAD biosynthesis through the ABA signaling pathway.; nicotinamidase 1 (NIC1); CONTAINS InterPro DOMAIN/s: Isochorismatase-like (InterPro:IPR000868); Has 35333 Blast hits to 34131 protein…
Bin: 16.1.4.10	secondary metabolism.isoprenoids.carotenoids.carotenoid cleavage dioxygenase
	Id: seq_812
	(at3g63520 : 922.0) Encodes a protein with 9-cis-epoxycarotenoid dioxygenase activity. The enzyme was shown to act on a variety of carotenoid including β-carotene, lutein, zeaxanthin, and all-trans-violaxanthin. When those compounds are used as substrates, the major reaction product detected is a C14 dialdehyde: 4,9-dimethyldodeca-2,4,6,8,10-pentaene-1,12-dial. The enzyme did not cleave as effici…
Bin: 16.1.3.4	secondary metabolism.isoprenoids.tocopherol biosynthesis.tocopherol cyclase
	Id: seq_1153
	(at4g32770 : 681.0) Tocopherol cyclase involved in tocopherol (vitamin E)synthesis. VTE1 over-expressing plants have increased tocopherol indicating VTE1 is a major limiting factor in tocopherol synthesis. Mutants defective in this gene accumulate high amounts of zeaxanthin in conditions of high light or low temperature. Plays a role in the adaptation to low temperature stress, notably phloem loa…
Bin: 16.1.3.3	secondary metabolism.isoprenoids.tocopherol biosynthesis.MPBQ/MSBQ methyltransferase
	Id: seq_904
	(p23525|in37_spiol : 352.0) 37 kDa inner envelope membrane protein, chloroplast precursor (E37) - Spinacia oleracea (Spinach) & (at3g63410 : 335.0) Encodes a MPBQ/MSBQ methyltransferase located in the chloroplast inner envelope membrane. Mutant plants lack plastoquinone (PQ), suggesting that the APG1 protein is involved in the methylation step of PQ biosynthesis. The gene product is also involved…
Bin: 16.1.2.7	secondary metabolism.isoprenoids.mevalonate pathway.isopentenyl pyrophosphate:dimethyllallyl pyrophosphate isomerase
	Id: seq_443
	(at3g02780 : 409.0) Encodes a protein with isopentenyl diphosphate:dimethylallyl diphosphate isomerase activity. There is genetic evidence that it functions in the mevalonate, but not the MEP biosynthetic pathway.; isopentenyl pyrophosphate:dimethylallyl pyrophosphate isomerase 2 (IPP2); FUNCTIONS IN: isopentenyl-diphosphate delta-isomerase activity; INVOLVED IN: chlorophyll biosynthetic process,…
Bin: 16.1.2.6	secondary metabolism.isoprenoids.mevalonate pathway.mevalonate diphosphate decarboxylase
	Id: seq_731
	(at3g54250 : 681.0) GHMP kinase family protein; FUNCTIONS IN: diphosphomevalonate decarboxylase activity, kinase activity, ATP binding; INVOLVED IN: isoprenoid biosynthetic process, phosphorylation; LOCATED IN: cellular_component unknown; EXPRESSED IN: 19 plant structures; EXPRESSED DURING: 9 growth stages; CONTAINS InterPro DOMAIN/s: Diphosphomevalonate decarboxylase (InterPro:IPR005935), Riboso…
Bin: 16.1.2.5	secondary metabolism.isoprenoids.mevalonate pathway.phosphomevalonate kinase
	Id: seq_772
	(at1g31910 : 632.0) GHMP kinase family protein; FUNCTIONS IN: kinase activity, ATP binding; INVOLVED IN: phosphorylation; EXPRESSED IN: 24 plant structures; EXPRESSED DURING: 15 growth stages; CONTAINS InterPro DOMAIN/s: Phosphomevalonate kinase, eukaryotic (InterPro:IPR005916), Phosphomevalonate kinase, ERG8 (InterPro:IPR016005), Ribosomal protein S5 domain 2-type fold (InterPro:IPR020568), GHMP…
Bin: 16.1.2.2	secondary metabolism.isoprenoids.mevalonate pathway.HMG-CoA synthase
	Id: seq_1395
	(at4g11820 : 360.0) Encodes a protein with hydroxymethylglutaryl-CoA synthase activity which was characterized by phenotypical complementation of the S. cerevisiae mutant.; MVA1; CONTAINS InterPro DOMAIN/s: Thiolase-like (InterPro:IPR016039), Hydroxymethylglutaryl-coenzyme A synthase C-terminal (InterPro:IPR013746), Hydroxymethylglutaryl-coenzyme A synthase, N-terminal (InterPro:IPR013528), Hydro…
Bin: 16.1.2.1	secondary metabolism.isoprenoids.mevalonate pathway.acetyl-CoA C-acyltransferase
	Id: seq_531
	(at5g48230 : 632.0) acetoacetyl-CoA thiolase 2 (ACAT2); FUNCTIONS IN: transferase activity, transferring acyl groups other than amino-acyl groups, acetyl-CoA C-acetyltransferase activity, catalytic activity; INVOLVED IN: embryo development ending in seed dormancy; LOCATED IN: peroxisome, plasma membrane; EXPRESSED IN: 24 plant structures; EXPRESSED DURING: 13 growth stages; CONTAINS InterPro DOMA…
Bin: 16.1.1.10	secondary metabolism.isoprenoids.non-mevalonate pathway.geranylgeranyl pyrophosphate synthase
	Id: seq_490
	(at4g38460 : 279.0) geranylgeranyl reductase (GGR); INVOLVED IN: isoprenoid biosynthetic process; LOCATED IN: chloroplast; EXPRESSED IN: 24 plant structures; EXPRESSED DURING: 13 growth stages; CONTAINS InterPro DOMAIN/s: Polyprenyl synthetase-related (InterPro:IPR017446), Terpenoid synthase (InterPro:IPR008949), Polyprenyl synthetase (InterPro:IPR000092); BEST Arabidopsis thaliana protein match …
Bin: 16.1.1.7	secondary metabolism.isoprenoids.non-mevalonate pathway.HDR
	Id: seq_1006
[truncated: 5,865 more rows]
