# Supplementary material for: A Multi-Omics Analysis Pipeline for the Metabolic Pathway Reconstruction in the Orphan Species Quercus ilex
Source: Front Plant Sci. 2018 Jul 11;9:935. doi: 10.3389/fpls.2018.00935 (PMC6050436; doi:10.3389/fpls.2018.00935)
Supplement: TABLE S10 — Enzymes (proteins). [file Table_10.xlsx]

## Sheet: Table S10 | Enzymes_Proteins
TABLE S10 | Enzymes (Proteins)
ath01100 Metabolic pathways - Arabidopsis thaliana (thale cress) (698)
EC:1.1.1.1	Alcohol dehydrogenase; aldehyde reductase; ADH; alcohol dehydrogenase (NAD); aliphatic alcohol dehydrogenase; ethanol dehydrogenase; NAD-dependent alcohol dehydrogenase; NAD-specific aromatic alcohol dehydrogenase; NADH-alcohol dehydrogenase; NADH-aldehyde dehydrogenase; primary alcohol dehydrogenase; yeast alcohol dehydrogenase
EC:1.1.1.100	3-oxoacyl-[acyl-carrier-protein] reductase; beta-ketoacyl-[acyl-carrier protein](ACP) reductase; beta-ketoacyl acyl carrier protein (ACP) reductase; beta-ketoacyl reductase; beta-ketoacyl thioester reductase; beta-ketoacyl-ACP reductase; beta-ketoacyl-acyl carrier protein reductase; 3-ketoacyl acyl carrier protein reductase; NADPH-specific 3-oxoacyl-[acylcarrier protein]reductase; 3-oxoacyl-[ACP]…
EC:1.1.1.195	cinnamyl-alcohol dehydrogenase; cinnamyl alcohol dehydrogenase; CAD (ambiguous)
EC:1.1.1.219	dihydroflavonol 4-reductase; dihydrokaempferol 4-reductase; dihydromyricetin reductase; NADPH-dihydromyricetin reductase; dihydroquercetin reductase; DFR (gene name); cis-3,4-leucopelargonidin:NADP+ 4-oxidoreductase; dihydroflavanol 4-reductase (incorrect)
EC:1.1.1.22	UDP-glucose 6-dehydrogenase; UDP-glucose dehydrogenase; uridine diphosphoglucose dehydrogenase; UDPG dehydrogenase; UDPG:NAD oxidoreductase; UDP-alpha-D-glucose:NAD oxidoreductase; UDP-glucose:NAD+ oxidoreductase; uridine diphosphate glucose dehydrogenase; UDP-D-glucose dehydrogenase; uridine diphosphate D-glucose dehydrogenase
EC:1.1.1.23	histidinol dehydrogenase; L-histidinol dehydrogenase
EC:1.1.1.27	L-lactate dehydrogenase; lactic acid dehydrogenase; L(+)-nLDH; L-(+)-lactate dehydrogenase; L-lactic dehydrogenase; L-lactic acid dehydrogenase; lactate dehydrogenase; lactate dehydrogenase NAD+-dependent; lactic dehydrogenase; NAD+-lactate dehydrogenase
EC:1.1.1.37	malate dehydrogenase; malic dehydrogenase; L-malate dehydrogenase; NAD-L-malate dehydrogenase; malic acid dehydrogenase; NAD-dependent malic dehydrogenase; NAD-malate dehydrogenase; NAD-malic dehydrogenase; malate (NAD) dehydrogenase; NAD-dependent malate dehydrogenase; NAD-specific malate dehydrogenase; NAD-linked malate dehydrogenase; MDH; L-malate-NAD+ oxidoreductase
EC:1.1.1.39	malate dehydrogenase (decarboxylating); 'malic' enzyme; pyruvic-malic carboxylase; NAD-specific malic enzyme; NAD-malic enzyme
EC:1.1.1.40	malate dehydrogenase (oxaloacetate-decarboxylating) (NADP+); 'malic' enzyme (ambiguous); pyruvic-malic carboxylase (ambiguous); malate dehydrogenase (decarboxylating, NADP+); NADP+-linked decarboxylating malic enzyme; NADP+-malic enzyme; NADP+-specific malic enzyme; NADP+-specific malate dehydrogenase; malate dehydrogenase (NADP+, decarboxylating); L-malate:NADP+ oxidoreductase
EC:1.1.1.42	isocitrate dehydrogenase (NADP+); oxalosuccinate decarboxylase; oxalsuccinic decarboxylase; isocitrate (NADP) dehydrogenase; isocitrate (nicotinamide adenine dinucleotide phosphate) dehydrogenase; NADP-specific isocitrate dehydrogenase; NADP-linked isocitrate dehydrogenase; NADP-dependent isocitrate dehydrogenase; NADP isocitric dehydrogenase; isocitrate dehydrogenase (NADP-dependent); NADP-depen…
EC:1.1.1.49	glucose-6-phosphate dehydrogenase (NADP+); NADP-glucose-6-phosphate dehydrogenase; Zwischenferment; D-glucose 6-phosphate dehydrogenase; glucose 6-phosphate dehydrogenase (NADP); NADP-dependent glucose 6-phosphate dehydrogenase; 6-phosphoglucose dehydrogenase; Entner-Doudoroff enzyme; glucose-6-phosphate 1-dehydrogenase; G6PDH; GPD; glucose-6-phosphate dehydrogenase
EC:1.1.1.82	malate dehydrogenase (NADP+); NADP+-malic enzyme; NADP+-malate dehydrogenase; malic dehydrogenase (nicotinamide adenine dinucleotide phosphate); malate NADP+ dehydrogenase; NADP+ malate dehydrogenase; NADP+-linked malate dehydrogenase; malate dehydrogenase (NADP+)
EC:1.1.1.85	3-isopropylmalate dehydrogenase; beta-isopropylmalic enzyme; beta-isopropylmalate dehydrogenase; threo-Ds-3-isopropylmalate dehydrogenase; 3-carboxy-2-hydroxy-4-methylpentanoate:NAD+ oxidoreductase
EC:1.1.1.86	ketol-acid reductoisomerase (NADP+); dihydroxyisovalerate dehydrogenase (isomerizing); acetohydroxy acid isomeroreductase; ketol acid reductoisomerase; alpha-keto-beta-hydroxylacyl reductoisomerase; 2-hydroxy-3-keto acid reductoisomerase; acetohydroxy acid reductoisomerase; acetolactate reductoisomerase; dihydroxyisovalerate (isomerizing) dehydrogenase; isomeroreductase; reductoisomerase; ketol-a…
EC:1.1.3.15	(S)-2-hydroxy-acid oxidase; hydroxy-acid oxidase A; hydroxy-acid oxidase B; glycolate oxidase; L-2-hydroxy acid oxidase; hydroxyacid oxidase A; L-alpha-hydroxy acid oxidase
EC:1.10.2.2	quinol---cytochrome-c reductase; ubiquinol---cytochrome-c reductase; coenzyme Q-cytochrome c reductase; dihydrocoenzyme Q-cytochrome c reductase; reduced ubiquinone-cytochrome c reductase; complex III (mitochondrial electron transport); ubiquinone-cytochrome c reductase; ubiquinol-cytochrome c oxidoreductase; reduced coenzyme Q-cytochrome c reductase; ubiquinone-cytochrome c oxidoreductase; reduc…
EC:1.10.3.3	L-ascorbate oxidase; ascorbase; ascorbic acid oxidase; ascorbate oxidase; ascorbic oxidase; ascorbate dehydrogenase; L-ascorbic acid oxidase; AAO; L-ascorbate:O2 oxidoreductase; AA oxidase
EC:1.11.1.15	peroxiredoxin; thioredoxin peroxidase; tryparedoxin peroxidase; alkyl hydroperoxide reductase C22; AhpC; TrxPx; TXNPx; Prx; PRDX
EC:1.11.1.7	peroxidase; lactoperoxidase; guaiacol peroxidase; plant peroxidase; Japanese radish peroxidase; horseradish peroxidase (HRP); soybean peroxidase (SBP); extensin peroxidase; heme peroxidase; oxyperoxidase; protoheme peroxidase; pyrocatechol peroxidase; scopoletin peroxidase; Coprinus cinereus peroxidase; Arthromyces ramosus peroxidase
EC:1.13.11.12	linoleate 13S-lipoxygenase; 13-lipoxidase; carotene oxidase; 13-lipoperoxidase; fat oxidase; 13-lipoxydase; lionoleate:O2 13-oxidoreductase
EC:1.14.11.19	anthocyanidin synthase; leucocyanidin oxygenase; leucocyanidin,2-oxoglutarate:oxygen oxidoreductase; ANS (gene name)
EC:1.14.11.9	flavanone 3-dioxygenase; naringenin 3-hydroxylase; flavanone 3-hydroxylase; flavanone 3beta-hydroxylase; flavanone synthase I; (2S)-flavanone 3-hydroxylase; naringenin,2-oxoglutarate:oxygen oxidoreductase (3-hydroxylating); F3H; flavanone,2-oxoglutarate:oxygen oxidoreductase (3-hydroxylating)
EC:1.14.17.4	aminocyclopropanecarboxylate oxidase; ACC oxidase; ethylene-forming enzyme
EC:1.18.1.2	ferredoxin---NADP+ reductase; ferredoxin-nicotinamide adenine dinucleotide phosphate reductase; ferredoxin-NADP+ reductase; TPNH-ferredoxin reductase; ferredoxin-NADP+ oxidoreductase; NADP+:ferredoxin oxidoreductase; ferredoxin-TPN reductase; ferredoxin-NADP+-oxidoreductase; NADPH:ferredoxin oxidoreductase; ferredoxin-nicotinamide-adenine dinucleotide phosphate (oxidized) reductase
EC:1.2.1.12	glyceraldehyde-3-phosphate dehydrogenase (phosphorylating); triosephosphate dehydrogenase; dehydrogenase, glyceraldehyde phosphate; phosphoglyceraldehyde dehydrogenase; 3-phosphoglyceraldehyde dehydrogenase; NAD+-dependent glyceraldehyde phosphate dehydrogenase; glyceraldehyde phosphate dehydrogenase (NAD+); glyceraldehyde-3-phosphate dehydrogenase (NAD+); NADH-glyceraldehyde phosphate dehydrogen…
EC:1.2.1.13	glyceraldehyde-3-phosphate dehydrogenase (NADP+) (phosphorylating); triosephosphate dehydrogenase (NADP+); dehydrogenase, glyceraldehyde phosphate (nicotinamide adenine dinucleotide phosphate) (phosphorylating); glyceraldehyde phosphate dehydrogenase (nicotinamide adenine dinucleotide phosphate) (phosphorylating); NADP+-glyceraldehyde-3-phosphate dehydrogenase; NADP+-glyceraldehyde phosphate dehy…
EC:1.2.1.2	formate dehydrogenase; formate-NAD+ oxidoreductase; FDH I; FDH II; N-FDH; formic hydrogen-lyase; formate hydrogenlyase; hydrogenlyase; NAD+-linked formate dehydrogenase; NAD+-dependent formate dehydrogenase; formate dehydrogenase (NAD+); NAD+-formate dehydrogenase; formate benzyl-viologen oxidoreductase; formic acid dehydrogenase
EC:1.2.1.3	aldehyde dehydrogenase (NAD+); CoA-independent aldehyde dehydrogenase; m-methylbenzaldehyde dehydrogenase; NAD-aldehyde dehydrogenase; NAD-dependent 4-hydroxynonenal dehydrogenase; NAD-dependent aldehyde dehydrogenase; NAD-linked aldehyde dehydrogenase; propionaldehyde dehydrogenase; aldehyde dehydrogenase (NAD)
EC:1.2.1.38	N-acetyl-gamma-glutamyl-phosphate reductase; reductase, acetyl-gamma-glutamyl phosphate; N-acetylglutamate 5-semialdehyde dehydrogenase; N-acetylglutamic gamma-semialdehyde dehydrogenase; N-acetyl-L-glutamate gamma-semialdehyde:NADP+ oxidoreductase (phosphorylating)
EC:1.2.1.8	betaine-aldehyde dehydrogenase; betaine aldehyde oxidase; BADH; betaine aldehyde dehydrogenase; BetB
EC:1.2.1.9	glyceraldehyde-3-phosphate dehydrogenase (NADP+); triosephosphate dehydrogenase; dehydrogenase, glyceraldehyde phosphate (nicotinamide adenine dinucleotide phosphate); glyceraldehyde phosphate dehydrogenase (NADP+); glyceraldehyde 3-phosphate dehydrogenase (NADP+); NADP+-glyceraldehyde phosphate dehydrogenase; NADP+-glyceraldehyde-3-phosphate dehydrogenase; glyceraldehyde-3-phosphate:NADP+ reduct…
EC:1.2.4.1	pyruvate dehydrogenase (acetyl-transferring); MtPDC (mitochondrial pyruvate dehydrogenase complex); pyruvate decarboxylase; pyruvate dehydrogenase; pyruvate dehydrogenase (lipoamide); pyruvate dehydrogenase complex; pyruvate:lipoamide 2-oxidoreductase (decarboxylating and acceptor-acetylating); pyruvic acid dehydrogenase; pyruvic dehydrogenase
EC:1.3.1.33	protochlorophyllide reductase; NADPH2-protochlorophyllide oxidoreductase; NADPH-protochlorophyllide oxidoreductase; NADPH-protochlorophyllide reductase; protochlorophyllide oxidoreductase (ambiguous); protochlorophyllide photooxidoreductase; light-dependent protochlorophyllide reductase
EC:1.3.1.9	enoyl-[acyl-carrier-protein] reductase (NADH); enoyl-[acyl carrier protein] reductase; enoyl-ACP reductase; NADH-enoyl acyl carrier protein reductase; NADH-specific enoyl-ACP reductase; acyl-[acyl-carrier-protein]:NAD+ oxidoreductase; fabI (gene name); inhA (gene name)
EC:1.3.3.3	coproporphyrinogen oxidase; coproporphyrinogen III oxidase; coproporphyrinogenase
EC:1.3.3.4	protoporphyrinogen oxidase; protoporphyrinogen IX oxidase; protoporphyrinogenase; PPO; Protox; HemG; HemY
EC:1.3.3.6	acyl-CoA oxidase; fatty acyl-CoA oxidase; acyl coenzyme A oxidase; fatty acyl-coenzyme A oxidase
EC:1.3.5.1	succinate dehydrogenase; succinate dehydrogenase (quinone); succinate dehydrogenase (ubiquinone); succinic dehydrogenase; complex II (ambiguous); succinate dehydrogenase complex; SDH; succinate:ubiquinone oxidoreductase
EC:1.4.1.3	glutamate dehydrogenase [NAD(P)+]; glutamic dehydrogenase; glutamate dehydrogenase [NAD(P)+]
EC:1.4.3.5	pyridoxal 5'-phosphate synthase; pyridoxamine 5'-phosphate oxidase; pyridoxamine phosphate oxidase; pyridoxine (pyridoxamine)phosphate oxidase; pyridoxine (pyridoxamine) 5'-phosphate oxidase; pyridoxaminephosphate oxidase (EC 1.4.3.5: deaminating); PMP oxidase; pyridoxol-5'-phosphate:oxygen oxidoreductase (deaminating) (incorrect); pyridoxamine-phosphate oxidase; PdxH
EC:1.4.4.2	glycine dehydrogenase (aminomethyl-transferring); P-protein; glycine decarboxylase; glycine-cleavage complex; glycine:lipoylprotein oxidoreductase (decarboxylating and acceptor-aminomethylating); protein P1; glycine dehydrogenase (decarboxylating); glycine cleavage system P-protein; glycine-cleavage complex P-protein
EC:1.5.1.20	methylenetetrahydrofolate reductase [NAD(P)H]; methylenetetrahydrofolate (reduced nicotinamide adenine dinucleotide phosphate) reductase; 5,10-methylenetetrahydrofolate reductase (NADPH); 5,10-methylenetetrahydrofolic acid reductase; 5,10-CH2-H4folate reductase; methylenetetrahydrofolate reductase (NADPH2); 5-methyltetrahydrofolate:NAD+ oxidoreductase; 5-methyltetrahydrofolate:NAD+ oxidoreductase…
EC:1.6.5.3	NADH:ubiquinone reductase (H+-translocating); ubiquinone reductase (ambiguous); type 1 dehydrogenase; complex 1 dehydrogenase; coenzyme Q reductase (ambiguous); complex I (electron transport chain); complex I (mitochondrial electron transport); complex I (NADH:Q1 oxidoreductase); dihydronicotinamide adenine dinucleotide-coenzyme Q reductase (ambiguous); DPNH-coenzyme Q reductase (ambiguous); DPNH…
EC:1.6.5.4	monodehydroascorbate reductase (NADH); NADH:semidehydroascorbic acid oxidoreductase; MDHA; semidehydroascorbate reductase; AFR; AFR-reductase; ascorbic free radical reductase; ascorbate free radical reductase; SOR; MDAsA reductase (NADPH) ; SDA reductase; NADH:ascorbate radical oxidoreductase; NADH-semidehydroascorbate oxidoreductase; ascorbate free-radical reductase ; NADH:AFR oxidoreductase; mo…
EC:1.8.1.4	dihydrolipoyl dehydrogenase; LDP-Glc; LDP-Val; dehydrolipoate dehydrogenase; diaphorase; dihydrolipoamide dehydrogenase; dihydrolipoamide:NAD+ oxidoreductase; dihydrolipoic dehydrogenase; dihydrothioctic dehydrogenase; lipoamide dehydrogenase (NADH); lipoamide oxidoreductase (NADH); lipoamide reductase; lipoamide reductase (NADH); lipoate dehydrogenase; lipoic acid dehydrogenase; lipoyl dehydroge…
EC:2.1.1.104	caffeoyl-CoA O-methyltransferase; caffeoyl coenzyme A methyltransferase; caffeoyl-CoA 3-O-methyltransferase; trans-caffeoyl-CoA 3-O-methyltransferase
EC:2.1.1.14	5-methyltetrahydropteroyltriglutamate---homocysteine S-methyltransferase; tetrahydropteroyltriglutamate methyltransferase; homocysteine methylase; methyltransferase, tetrahydropteroylglutamate-homocysteine transmethylase; methyltetrahydropteroylpolyglutamate:homocysteine methyltransferase; cobalamin-independent methionine synthase; methionine synthase (cobalamin-independent); MetE
EC:2.1.1.68	caffeate O-methyltransferase; caffeate methyltransferase; caffeate 3-O-methyltransferase; S-adenosyl-L-methionine:caffeic acid-O-methyltransferase
EC:2.1.2.1	glycine hydroxymethyltransferase; serine aldolase; threonine aldolase; serine hydroxymethylase; serine hydroxymethyltransferase; allothreonine aldolase; L-serine hydroxymethyltransferase; L-threonine aldolase; serine hydroxymethyltransferase; serine transhydroxymethylase
EC:2.1.2.10	aminomethyltransferase; S-aminomethyldihydrolipoylprotein:(6S)-tetrahydrofolate aminomethyltransferase (ammonia-forming); T-protein; glycine synthase; tetrahydrofolate aminomethyltransferase; [protein]-8-S-aminomethyldihydrolipoyllysine:tetrahydrofolate aminomethyltransferase (ammonia-forming)
EC:2.1.3.3	ornithine carbamoyltransferase; citrulline phosphorylase; ornithine transcarbamylase; OTC; carbamylphosphate-ornithine transcarbamylase; L-ornithine carbamoyltransferase; L-ornithine carbamyltransferase; L-ornithine transcarbamylase; ornithine carbamyltransferase
EC:2.2.1.1	transketolase; glycolaldehydetransferase
EC:2.2.1.6	acetolactate synthase; alpha-acetohydroxy acid synthetase; alpha-acetohydroxyacid synthase; alpha-acetolactate synthase; alpha-acetolactate synthetase; acetohydroxy acid synthetase; acetohydroxyacid synthase; acetolactate pyruvate-lyase (carboxylating); acetolactic synthetase
EC:2.3.1.74	naringenin-chalcone synthase; chalcone synthase; flavanone synthase; 6'-deoxychalcone synthase; chalcone synthetase; DOCS; CHS
EC:2.3.3.1	citrate (Si)-synthase; (R)-citric synthase; citrate oxaloacetate-lyase [(pro-3S)-CH2COO-->acetyl-CoA]
EC:2.3.3.13	2-isopropylmalate synthase; 3-carboxy-3-hydroxy-4-methylpentanoate 3-methyl-2-oxobutanoate-lyase (CoA-acetylating); alpha-isopropylmalate synthetase; alpha-isopropylmalate synthase; alpha-isopropylmalic synthetase; isopropylmalate synthase; isopropylmalate synthetase
EC:2.3.3.9	malate synthase; L-malate glyoxylate-lyase (CoA-acetylating); glyoxylate transacetylase; glyoxylate transacetase; glyoxylic transacetase; malate condensing enzyme; malate synthetase; malic synthetase; malic-condensing enzyme; acetyl-CoA:glyoxylate C-acetyltransferase (thioester-hydrolysing, carboxymethyl-forming)
EC:2.4.1.1	glycogen phosphorylase; muscle phosphorylase a and b; amylophosphorylase; polyphosphorylase; amylopectin phosphorylase; glucan phosphorylase; alpha-glucan phosphorylase; 1,4-alpha-glucan phosphorylase; glucosan phosphorylase; granulose phosphorylase; maltodextrin phosphorylase; muscle phosphorylase; myophosphorylase; potato phosphorylase; starch phosphorylase; 1,4-alpha-D-glucan:phosphate alpha-D…
EC:2.4.1.13	sucrose synthase; UDPglucose-fructose glucosyltransferase; sucrose synthetase; sucrose-UDP glucosyltransferase; sucrose-uridine diphosphate glucosyltransferase; uridine diphosphoglucose-fructose glucosyltransferase; NDP-glucose:D-fructose 2-alpha-D-glucosyltransferase
EC:2.4.1.18	1,4-alpha-glucan branching enzyme; branching enzyme; amylo-(1,4->1,6)-transglycosylase; Q-enzyme; alpha-glucan-branching glycosyltransferase; amylose isomerase; enzymatic branching factor; branching glycosyltransferase; enzyme Q; glucosan transglycosylase; glycogen branching enzyme; plant branching enzyme; alpha-1,4-glucan:alpha-1,4-glucan-6-glycosyltransferase; starch branching enzyme; 1,4-alpha…
EC:2.4.1.21	starch synthase (glycosyl-transferring); ADP-glucose---starch glucosyltransferase; adenosine diphosphate glucose-starch glucosyltransferase; adenosine diphosphoglucose-starch glucosyltransferase; ADP-glucose starch synthase; ADP-glucose synthase; ADP-glucose transglucosylase; ADP-glucose-starch glucosyltransferase; ADPG starch synthetase; ADPG-starch glucosyltransferase; starch synthetase; ADP-gl…
EC:2.4.1.242	NDP-glucose---starch glucosyltransferase; granule-bound starch synthase; starch synthase II (ambiguous); waxy protein; starch granule-bound nucleoside diphosphate glucose-starch glucosyltransferase; granule-bound starch synthase I; GBSSI; granule-bound starch synthase II; GBSSII; GBSS; NDPglucose-starch glucosyltransferase
EC:2.4.1.25	4-alpha-glucanotransferase; disproportionating enzyme; dextrin glycosyltransferase; D-enzyme; debranching enzyme maltodextrin glycosyltransferase; amylomaltase; dextrin transglycosylase; 1,4-alpha-D-glucan:1,4-alpha-D-glucan 4-alpha-D-glycosyltransferase
EC:2.4.2.10	orotate phosphoribosyltransferase; orotidylic acid phosphorylase; orotidine-5'-phosphate pyrophosphorylase; OPRTase; orotate phosphoribosyl pyrophosphate transferase; orotic acid phosphoribosyltransferase; orotidine 5'-monophosphate pyrophosphorylase; orotidine monophosphate pyrophosphorylase; orotidine phosphoribosyltransferase; orotidylate phosphoribosyltransferase; orotidylate pyrophosphorylas…
EC:2.4.2.14	amidophosphoribosyltransferase; phosphoribosyldiphosphate 5-amidotransferase; glutamine phosphoribosyldiphosphate amidotransferase; alpha-5-phosphoribosyl-1-pyrophosphate amidotransferase; 5'-phosphoribosylpyrophosphate amidotransferase; 5-phosphoribosyl-1-pyrophosphate amidotransferase; 5-phosphororibosyl-1-pyrophosphate amidotransferase; glutamine 5-phosphoribosylpyrophosphate amidotransferase;…
EC:2.4.2.7	adenine phosphoribosyltransferase; AMP pyrophosphorylase; transphosphoribosidase; APRT; AMP-pyrophosphate phosphoribosyltransferase; adenine phosphoribosylpyrophosphate transferase; adenosine phosphoribosyltransferase; adenylate pyrophosphorylase; adenylic pyrophosphorylase
EC:2.4.2.9	uracil phosphoribosyltransferase; UMP pyrophosphorylase; UPRTase; UMP:pyrophosphate phosphoribosyltransferase; uridine 5'-phosphate pyrophosphorylase; uridine monophosphate pyrophosphorylase; uridylate pyrophosphorylase; uridylic pyrophosphorylase
EC:2.5.1.1	dimethylallyltranstransferase; geranyl-diphosphate synthase; prenyltransferase; dimethylallyltransferase; DMAPP:IPP-dimethylallyltransferase; (2E,6E)-farnesyl diphosphate synthetase; diprenyltransferase; geranyl pyrophosphate synthase; geranyl pyrophosphate synthetase; trans-farnesyl pyrophosphate synthetase
EC:2.5.1.16	spermidine synthase; aminopropyltransferase; putrescine aminopropyltransferase; spermidine synthetase; SpeE; S-adenosylmethioninamine:putrescine 3-aminopropyltransferase
EC:2.5.1.18	glutathione transferase; glutathione S-transferase; glutathione S-alkyltransferase; glutathione S-aryltransferase; S-(hydroxyalkyl)glutathione lyase; glutathione S-aralkyltransferase; glutathione S-alkyl transferase; GST
EC:2.5.1.19	3-phosphoshikimate 1-carboxyvinyltransferase; 5-enolpyruvylshikimate-3-phosphate synthase; 3-enolpyruvylshikimate 5-phosphate synthase; 3-enolpyruvylshikimic acid-5-phosphate synthetase; 5'-enolpyruvylshikimate-3-phosphate synthase; 5-enolpyruvyl-3-phosphoshikimate synthase; 5-enolpyruvylshikimate-3-phosphate synthetase; 5-enolpyruvylshikimate-3-phosphoric acid synthase; enolpyruvylshikimate phos…
EC:2.5.1.47	cysteine synthase; O-acetyl-L-serine sulfhydrylase; O-acetyl-L-serine sulfohydrolase; O-acetylserine (thiol)-lyase; O-acetylserine (thiol)-lyase A; O-acetylserine sulfhydrylase; O3-acetyl-L-serine acetate-lyase (adding hydrogen-sulfide); acetylserine sulfhydrylase; cysteine synthetase; S-sulfocysteine synthase; 3-O-acetyl-L-serine:hydrogen-sulfide 2-amino-2-carboxyethyltransferase; O3-acetyl-L-se…
EC:2.5.1.54	3-deoxy-7-phosphoheptulonate synthase; 2-dehydro-3-deoxy-phosphoheptonate aldolase; 2-keto-3-deoxy-D-arabino-heptonic acid 7-phosphate synthetase; 3-deoxy-D-arabino-2-heptulosonic acid 7-phosphate synthetase; 3-deoxy-D-arabino-heptolosonate-7-phosphate synthetase; 3-deoxy-D-arabino-heptulosonate 7-phosphate synthetase; 7-phospho-2-keto-3-deoxy-D-arabino-heptonate D-erythrose-4-phosphate lyase (py…
EC:2.5.1.55	3-deoxy-8-phosphooctulonate synthase; 2-dehydro-3-deoxy-D-octonate-8-phosphate D-arabinose-5-phosphate-lyase (pyruvate-phosphorylating); 2-dehydro-3-deoxy-phosphooctonate aldolase; 2-keto-3-deoxy-8-phosphooctonic synthetase; 3-deoxy-D-manno-octulosonate-8-phosphate synthase; 3-deoxy-D-mannooctulosonate-8-phosphate synthetase; 3-deoxyoctulosonic 8-phosphate synthetase; KDOP synthase; phospho-2-ket…
EC:2.5.1.6	methionine adenosyltransferase; adenosylmethionine synthetase; ATP-methionine adenosyltransferase; methionine S-adenosyltransferase; methionine-activating enzyme; S-adenosyl-L-methionine synthetase; S-adenosylmethionine synthase; S-adenosylmethionine synthetase; AdoMet synthetase
EC:2.5.1.61	hydroxymethylbilane synthase; HMB-synthase; porphobilinogen deaminase; pre-uroporphyrinogen synthase; uroporphyrinogen I synthase; uroporphyrinogen I synthetase; uroporphyrinogen synthase; uroporphyrinogen synthetase; porphobilinogen ammonia-lyase (polymerizing); (4-[2-carboxyethyl]-3-[carboxymethyl]pyrrol-2-yl)methyltransferase (hydrolysing)
EC:2.5.1.9	riboflavin synthase; heavy riboflavin synthase; light riboflavin synthase; riboflavin synthetase; riboflavine synthase; riboflavine synthetase
EC:2.6.1.1	aspartate transaminase; glutamic-oxaloacetic transaminase; glutamic-aspartic transaminase; transaminase A; AAT; AspT; 2-oxoglutarate-glutamate aminotransferase; aspartate alpha-ketoglutarate transaminase; aspartate aminotransferase; aspartate-2-oxoglutarate transaminase; aspartic acid aminotransferase; aspartic aminotransferase; aspartyl aminotransferase; AST; glutamate-oxalacetate aminotransfera…
EC:2.6.1.2	alanine transaminase; glutamic-pyruvic transaminase; glutamic-alanine transaminase; GPT (ambiguous); beta-alanine aminotransferase; alanine aminotransferase; alanine-alpha-ketoglutarate aminotransferase; alanine-pyruvate aminotransferase; ALT; glutamic acid-pyruvic acid transaminase; glutamic-pyruvic aminotransferase; L-alanine aminotransferase; L-alanine transaminase; L-alanine-alpha-ketoglutara…
EC:2.6.1.52	phosphoserine transaminase; PSAT; phosphoserine aminotransferase; 3-phosphoserine aminotransferase; hydroxypyruvic phosphate-glutamic transaminase; L-phosphoserine aminotransferase; phosphohydroxypyruvate transaminase; phosphohydroxypyruvic-glutamic transaminase; 3-O-phospho-L-serine:2-oxoglutarate aminotransferase; SerC; PdxC; 3PHP transaminase
EC:2.7.1.1	hexokinase; hexokinase type IV glucokinase; hexokinase D; hexokinase type IV; hexokinase (phosphorylating); ATP-dependent hexokinase; glucose ATP phosphotransferase
EC:2.7.1.134	inositol-tetrakisphosphate 1-kinase; 1D-myo-inositol-tetrakisphosphate 1-kinase; inositol-trisphosphate 6-kinase; 1D-myo-inositol-trisphosphate 6-kinase; ATP:1D-myo-inositol-1,3,4-trisphosphate 6-phosphotransferase; inositol-trisphosphate 5-kinase; 1D-myo-inositol-trisphosphate 5-kinase; ATP:1D-myo-inositol-1,3,4-trisphosphate 5-phosphotransferase
EC:2.7.1.19	phosphoribulokinase; phosphopentokinase; ribulose-5-phosphate kinase; phosphopentokinase; phosphoribulokinase (phosphorylating); 5-phosphoribulose kinase; ribulose phosphate kinase; PKK; PRuK; PRK
EC:2.7.1.20	adenosine kinase; adenosine kinase (phosphorylating)
EC:2.7.1.4	fructokinase; fructokinase (phosphorylating); D-fructokinase; D-fructose(D-mannose)kinase
EC:2.7.1.40	pyruvate kinase; phosphoenolpyruvate kinase; phosphoenol transphosphorylase
EC:2.7.1.90	diphosphate---fructose-6-phosphate 1-phosphotransferase; 6-phosphofructokinase (pyrophosphate); pyrophosphate-fructose 6-phosphate 1-phosphotransferase; inorganic pyrophosphate-dependent phosphofructokinase; inorganic pyrophosphate-phosphofructokinase; pyrophosphate-dependent phosphofructo-1-kinase; pyrophosphate-fructose 6-phosphate phosphotransferase
EC:2.7.2.11	glutamate 5-kinase; ATP-L-glutamate 5-phosphotransferase; ATP:gamma-L-glutamate phosphotransferase; gamma-glutamate kinase; gamma-glutamyl kinase; glutamate kinase
EC:2.7.2.3	phosphoglycerate kinase; PGK; 3-PGK; ATP-3-phospho-D-glycerate-1-phosphotransferase; ATP:D-3-phosphoglycerate 1-phosphotransferase; 3-phosphoglycerate kinase; 3-phosphoglycerate phosphokinase; 3-phosphoglyceric acid kinase; 3-phosphoglyceric acid phosphokinase; 3-phosphoglyceric kinase; glycerate 3-phosphate kinase; glycerophosphate kinase; phosphoglyceric acid kinase; phosphoglyceric kinase; pho…
EC:2.7.4.3	adenylate kinase; myokinase; 5'-AMP-kinase; adenylic kinase; adenylokinase
EC:2.7.4.6	nucleoside-diphosphate kinase; nucleoside 5'-diphosphate kinase; nucleoside diphosphate (UDP) kinase; nucleoside diphosphokinase; nucleotide phosphate kinase; UDP kinase; uridine diphosphate kinase
EC:2.7.6.1	ribose-phosphate diphosphokinase; ribose-phosphate pyrophosphokinase; PRPP synthetase; phosphoribosylpyrophosphate synthetase; PPRibP synthetase; PP-ribose P synthetase; 5-phosphoribosyl-1-pyrophosphate synthetase; 5-phosphoribose pyrophosphorylase; 5-phosphoribosyl-alpha-1-pyrophosphate synthetase; phosphoribosyl-diphosphate synthetase; phosphoribosylpyrophosphate synthase; pyrophosphoribosylpho…
EC:2.7.7.27	glucose-1-phosphate adenylyltransferase; ADP glucose pyrophosphorylase; glucose 1-phosphate adenylyltransferase; adenosine diphosphate glucose pyrophosphorylase; adenosine diphosphoglucose pyrophosphorylase; ADP-glucose pyrophosphorylase; ADP-glucose synthase; ADP-glucose synthetase; ADPG pyrophosphorylase; ADP:alpha-D-glucose-1-phosphate adenylyltransferase
EC:2.7.7.6	DNA-directed RNA polymerase; RNA polymerase; RNA nucleotidyltransferase (DNA-directed); RNA polymerase I; RNA polymerase II; RNA polymerase III; C RNA formation factors; deoxyribonucleic acid-dependent ribonucleic acid polymerase; DNA-dependent ribonucleate nucleotidyltransferase; DNA-dependent RNA nucleotidyltransferase; DNA-dependent RNA polymerase; ribonucleate nucleotidyltransferase; ribonucl…
EC:2.7.7.9	UTP---glucose-1-phosphate uridylyltransferase; UDP glucose pyrophosphorylase; glucose-1-phosphate uridylyltransferase; UDPG phosphorylase; UDPG pyrophosphorylase; uridine 5'-diphosphoglucose pyrophosphorylase; uridine diphosphoglucose pyrophosphorylase; uridine diphosphate-D-glucose pyrophosphorylase; uridine-diphosphate glucose pyrophosphorylase
EC:2.7.9.1	pyruvate, phosphate dikinase; pyruvate, orthophosphate dikinase; pyruvate-phosphate dikinase (phosphorylating); pyruvate, phosphate dikinase; pyruvate-inorganic phosphate dikinase; pyruvate-phosphate dikinase; pyruvate-phosphate ligase; pyruvic-phosphate dikinase; pyruvic-phosphate ligase; pyruvate, Pi dikinase; PPDK
EC:3.1.1.11	pectinesterase; pectin demethoxylase; pectin methoxylase; pectin methylesterase; pectase; pectin methyl esterase; pectinoesterase
EC:3.1.3.11	fructose-bisphosphatase; hexose diphosphatase; FBPase; fructose 1,6-diphosphatase; fructose 1,6-diphosphate phosphatase; D-fructose 1,6-diphosphatase; fructose 1,6-bisphosphatase; fructose diphosphatase; fructose diphosphate phosphatase; fructose bisphosphate phosphatase; fructose 1,6-bisphosphate 1-phosphatase; fructose 1,6-bisphosphate phosphatase; hexose bisphosphatase; D-fructose-1,6-bisphosp…
EC:3.1.3.25	inositol-phosphate phosphatase; myo-inositol-1(or 4)-monophosphatase; inositol 1-phosphatase; L-myo-inositol-1-phosphate phosphatase; myo-inositol 1-phosphatase; inositol phosphatase; inositol monophosphate phosphatase; inositol-1(or 4)-monophosphatase; myo-inositol-1(or 4)-phosphate phosphohydrolase; myo-inositol monophosphatase; myo-inositol-1-phosphatase
EC:3.1.3.37	sedoheptulose-bisphosphatase; SBPase; sedoheptulose 1,7-diphospate phosphatase; sedoheptulose 1,7-diphosphatase; sedoheptulose diphosphatase; sedoheptulose bisphosphatase; sedoheptulose 1,7-bisphosphatase
EC:3.1.4.4	phospholipase D; lipophosphodiesterase II; lecithinase D; choline phosphatase
EC:3.2.1.1	alpha-amylase; glycogenase; alpha amylase, alpha-amylase; endoamylase; Taka-amylase A; 1,4-alpha-D-glucan glucanohydrolase
EC:3.2.1.14	chitinase; ChiC; chitodextrinase (ambiguous); 1,4-beta-poly-N-acetylglucosaminidase; poly-beta-glucosaminidase; beta-1,4-poly-N-acetyl glucosamidinase; poly[1,4-(N-acetyl-beta-D-glucosaminide)] glycanohydrolase
EC:3.2.1.20	alpha-glucosidase; maltase; glucoinvertase; glucosidosucrase; maltase-glucoamylase; alpha-glucopyranosidase; glucosidoinvertase; alpha-D-glucosidase; alpha-glucoside hydrolase; alpha-1,4-glucosidase
EC:3.2.1.21	beta-glucosidase; gentiobiase; cellobiase; emulsin; elaterase; aryl-beta-glucosidase; beta-D-glucosidase; beta-glucoside glucohydrolase; arbutinase; amygdalinase; p-nitrophenyl beta-glucosidase; primeverosidase; amygdalase; linamarase; salicilinase; beta-1,6-glucosidase
EC:3.2.1.23	beta-galactosidase; lactase (ambiguous); beta-lactosidase; maxilact; hydrolact; beta-D-lactosidase; S 2107; lactozym; trilactase; beta-D-galactanase; oryzatym; sumiklat
EC:3.2.1.26	eta-fructofuranosidase; invertase; saccharase; glucosucrase; beta-h-fructosidase; beta-fructosidase; invertin; sucrase; maxinvert L 1000; fructosylinvertase; alkaline invertase; acid invertase
EC:3.2.1.67	galacturan 1,4-alpha-galacturonidase; exopolygalacturonase; poly(galacturonate) hydrolase; exo-D-galacturonase; exo-D-galacturonanase; exopoly-D-galacturonase; poly(1,4-alpha-D-galacturonide) galacturonohydrolase
EC:3.3.1.1	adenosylhomocysteinase; S-adenosylhomocysteine synthase; S-adenosylhomocysteine hydrolase (ambiguous); adenosylhomocysteine hydrolase; S-adenosylhomocysteinase; SAHase; AdoHcyase
EC:3.4.11.1	leucyl aminopeptidase; leucine aminopeptidase; leucyl peptidase; peptidase S; cytosol aminopeptidase; cathepsin III; L-leucine aminopeptidase; leucinaminopeptidase; leucinamide aminopeptidase; FTBL proteins; proteinates FTBL; aminopeptidase II; aminopeptidase III; aminopeptidase I
EC:3.5.1.5	urease
EC:3.5.1.53	N-carbamoylputrescine amidase; carbamoylputrescine hydrolase; NCP
EC:3.5.3.1	arginase; arginine amidinase; canavanase; L-arginase; arginine transamidinase
EC:3.6.3.14	H+-transporting two-sector ATPase; ATP synthase; F1-ATPase; FoF1-ATPase; H+-transporting ATPase; mitochondrial ATPase; coupling factors (F0, F1 and CF1); chloroplast ATPase; bacterial Ca2+/Mg2+ ATPase
EC:4.1.1.1	pyruvate decarboxylase; alpha-carboxylase (ambiguous); pyruvic decarboxylase; alpha-ketoacid carboxylase; 2-oxo-acid carboxy-lyase
EC:4.1.1.15	glutamate decarboxylase; L-glutamic acid decarboxylase; L-glutamic decarboxylase; cysteic acid decarboxylase; L-glutamate alpha-decarboxylase; aspartate 1-decarboxylase; aspartic alpha-decarboxylase; L-aspartate-alpha-decarboxylase; gamma-glutamate decarboxylase; L-glutamate 1-carboxy-lyase
EC:4.1.1.31	phosphoenolpyruvate carboxylase; phosphopyruvate (phosphate) carboxylase; PEP carboxylase; phosphoenolpyruvic carboxylase; PEPC; PEPCase; phosphate:oxaloacetate carboxy-lyase (phosphorylating)
EC:4.1.1.37	uroporphyrinogen decarboxylase; uroporphyrinogen III decarboxylase; porphyrinogen carboxy-lyase; porphyrinogen decarboxylase; uroporphyrinogen-III carboxy-lyase
EC:4.1.1.39	ribulose-bisphosphate carboxylase; D-ribulose 1,5-diphosphate carboxylase; D-ribulose-1,5-bisphosphate carboxylase; RuBP carboxylase; carboxydismutase; diphosphoribulose carboxylase; ribulose 1,5-bisphosphate carboxylase; ribulose 1,5-bisphosphate carboxylase/oxygenase; ribulose 1,5-diphosphate carboxylase; ribulose 1,5-diphosphate carboxylase/oxygenase; ribulose bisphosphate carboxylase/oxygenas…
EC:4.1.1.49	phosphoenolpyruvate carboxykinase (ATP); phosphopyruvate carboxylase (ATP); phosphoenolpyruvate carboxylase (ambiguous); phosphoenolpyruvate carboxykinase (ambiguous); phosphopyruvate carboxykinase (adenosine triphosphate); PEP carboxylase (ambiguous); PEP carboxykinase (ambiguous); PEPCK (ATP); PEPK; PEPCK; phosphoenolpyruvic carboxylase (ambiguous); phosphoenolpyruvic carboxykinase (ambiguous);…
EC:4.1.2.13	fructose-bisphosphate aldolase; aldolase; fructose-1,6-bisphosphate triosephosphate-lyase; fructose diphosphate aldolase; diphosphofructose aldolase; fructose 1,6-diphosphate aldolase; ketose 1-phosphate aldolase; phosphofructoaldolase; zymohexase; fructoaldolase; fructose 1-phosphate aldolase; fructose 1-monophosphate aldolase; 1,6-diphosphofructose aldolase; SMALDO; D-fructose-1,6-bisphosphate …
EC:4.1.3.1	isocitrate lyase; isocitrase; isocitritase; isocitratase; threo-Ds-isocitrate glyoxylate-lyase; isocitrate glyoxylate-lyase
EC:4.2.1.11	phosphopyruvate hydratase; enolase; 2-phosphoglycerate dehydratase; 14-3-2-protein; nervous-system specific enolase; phosphoenolpyruvate hydratase; 2-phosphoglycerate dehydratase; 2-phosphoglyceric dehydratase; 2-phosphoglycerate enolase; gamma-enolase; 2-phospho-D-glycerate hydro-lyase
EC:4.2.1.17	enoyl-CoA hydratase; enoyl hydrase; unsaturated acyl-CoA hydratase; beta-hydroxyacyl-CoA dehydrase; beta-hydroxyacid dehydrase; acyl coenzyme A hydrase; crotonase; crotonyl hydrase; 2-octenoyl coenzyme A hydrase; enoyl coenzyme A hydratase; 2-enoyl-CoA hydratase; short-chain enoyl-CoA hydratase; ECH; trans-2-enoyl-CoA hydratase; enoyl coenzyme A hydrase (D); enoyl coenzyme A hydrase (L); short ch…
EC:4.2.1.20	tryptophan synthase; L-tryptophan synthetase; indoleglycerol phosphate aldolase; tryptophan desmolase; tryptophan synthetase; L-serine hydro-lyase (adding indoleglycerol-phosphate); L-serine hydro-lyase [adding 1-C-(indol-3-yl)glycerol 3-phosphate, L-tryptophan and glyceraldehyde-3-phosphate-forming]
EC:4.2.1.24	porphobilinogen synthase; aminolevulinate dehydratase; delta-aminolevulinate dehydratase; delta-aminolevulinic acid dehydrase; delta-aminolevulinic acid dehydratase; aminolevulinic dehydratase; delta-aminolevulinic dehydratase; 5-levulinic acid dehydratase; 5-aminolevulinate hydro-lyase (adding 5-aminolevulinate and cyclizing); hemB (gene name)
EC:4.2.1.3	aconitate hydratase; cis-aconitase; aconitase; AcnB; 2-methylaconitate hydratase; citrate(isocitrate) hydro-lyase
EC:4.2.3.1	threonine synthase; threonine synthetase; O-phospho-L-homoserine phospho-lyase (adding water)
EC:4.3.3.2	strictosidine synthase; strictosidine synthetase; STR; 3-alpha(S)-strictosidine tryptamine-lyase
EC:5.1.3.1	ribulose-phosphate 3-epimerase; phosphoribulose epimerase; erythrose-4-phosphate isomerase; phosphoketopentose 3-epimerase; xylulose phosphate 3-epimerase; phosphoketopentose epimerase; ribulose 5-phosphate 3-epimerase; D-ribulose phosphate-3-epimerase; D-ribulose 5-phosphate epimerase; D-ribulose-5-P 3-epimerase; D-xylulose-5-phosphate 3-epimerase; pentose-5-phosphate 3-epimerase
EC:5.1.3.18	GDP-mannose 3,5-epimerase; GDP-D-mannose:GDP-L-galactose epimerase; guanosine 5'-diphosphate D-mannose:guanosine 5'-diphosphate L-galactose epimerase
EC:5.1.3.2	UDP-glucose 4-epimerase; UDP-galactose 4-epimerase; uridine diphosphoglucose epimerase; galactowaldenase; UDPG-4-epimerase; uridine diphosphate galactose 4-epimerase; uridine diphospho-galactose-4-epimerase; UDP-glucose epimerase; 4-epimerase; uridine diphosphoglucose 4-epimerase; uridine diphosphate glucose 4-epimerase; UDP-D-galactose 4-epimerase
EC:5.1.3.5	UDP-arabinose 4-epimerase; uridine diphosphoarabinose epimerase; UDP arabinose epimerase; uridine 5'-diphosphate-D-xylose 4-epimerase; UDP-D-xylose 4-epimerase
EC:5.3.1.1	triose-phosphate isomerase; phosphotriose isomerase; triose phosphoisomerase; triose phosphate mutase; D-glyceraldehyde-3-phosphate ketol-isomerase
EC:5.3.1.5	xylose isomerase; D-xylose isomerase; D-xylose ketoisomerase; D-xylose ketol-isomerase
EC:5.3.1.9	glucose-6-phosphate isomerase; phosphohexose isomerase; phosphohexomutase; oxoisomerase; hexosephosphate isomerase; phosphosaccharomutase; phosphoglucoisomerase; phosphohexoisomerase; phosphoglucose isomerase; glucose phosphate isomerase; hexose phosphate isomerase; D-glucose-6-phosphate ketol-isomerase
EC:5.4.2.2	phosphoglucomutase (alpha-D-glucose-1,6-bisphosphate-dependent); glucose phosphomutase; phosphoglucose mutase
EC:5.4.3.8	glutamate-1-semialdehyde 2,1-aminomutase; glutamate-1-semialdehyde aminotransferase
EC:5.5.1.4	inositol-3-phosphate synthase; myo-inositol-1-phosphate synthase; D-glucose 6-phosphate cycloaldolase; inositol 1-phosphate synthatase; glucose 6-phosphate cyclase; inositol 1-phosphate synthetase; glucose-6-phosphate inositol monophosphate cycloaldolase; glucocycloaldolase; 1L-myo-inositol-1-phosphate lyase (isomerizing)
EC:5.5.1.6	chalcone isomerase; chalcone-flavanone isomerase; flavanone lyase (decyclizing)
EC:6.1.1.18	glutamine---tRNA ligase; glutaminyl-tRNA synthetase; glutaminyl-transfer RNA synthetase; glutaminyl-transfer ribonucleate synthetase; glutamine-tRNA synthetase; glutamine translase; glutamate-tRNA ligase; glutaminyl ribonucleic acid; GlnRS
EC:6.2.1.12	4-coumarate---CoA ligase; 4-coumaroyl-CoA synthetase; p-coumaroyl CoA ligase; p-coumaryl coenzyme A synthetase; p-coumaryl-CoA synthetase; p-coumaryl-CoA ligase; feruloyl CoA ligase; hydroxycinnamoyl CoA synthetase; 4-coumarate:coenzyme A ligase; caffeolyl coenzyme A synthetase; p-hydroxycinnamoyl coenzyme A synthetase; feruloyl coenzyme A synthetase; sinapoyl coenzyme A synthetase; 4-coumaryl-Co…
EC:6.2.1.4	succinate---CoA ligase (GDP-forming); succinyl-CoA synthetase (GDP-forming); succinyl coenzyme A synthetase (guanosine diphosphate-forming); succinate thiokinase; succinic thiokinase; succinyl coenzyme A synthetase; succinate-phosphorylating enzyme; P-enzyme; SCS; G-STK; succinyl coenzyme A synthetase (GDP-forming); succinyl CoA synthetase; succinyl coenzyme A synthetase
EC:6.3.1.2	glutamine synthetase; glutamate---ammonia ligase; glutamylhydroxamic synthetase; L-glutamine synthetase; GS
EC:6.3.2.2	glutamate---cysteine ligase; gamma-glutamylcysteine synthetase; gamma-glutamyl-L-cysteine synthetase; gamma-glutamylcysteinyl synthetase
EC:6.3.3.1	phosphoribosylformylglycinamidine cyclo-ligase; phosphoribosylaminoimidazole synthetase; AIR synthetase; 5'-aminoimidazole ribonucleotide synthetase; 2-(formamido)-1-N-(5-phosphoribosyl)acetamidine cyclo-ligase (ADP-forming)
EC:6.3.4.13	phosphoribosylamine---glycine ligase; phosphoribosylglycinamide synthetase; glycinamide ribonucleotide synthetase; phosphoribosylglycineamide synthetase; glycineamide ribonucleotide synthetase; 2-amino-N-ribosylacetamide 5'-phosphate kinosynthase; 5'-phosphoribosylglycinamide synthetase; GAR
EC:6.3.4.3	formate---tetrahydrofolate ligase; formyltetrahydrofolate synthetase; 10-formyltetrahydrofolate synthetase; tetrahydrofolic formylase; tetrahydrofolate formylase
EC:6.3.4.4	adenylosuccinate synthase; IMP---aspartate ligase; adenylosuccinate synthetase; succinoadenylic kinosynthetase; succino-AMP synthetase
EC:6.3.5.4	asparagine synthase (glutamine-hydrolysing); asparagine synthetase (glutamine-hydrolysing); glutamine-dependent asparagine synthetase; asparagine synthetase B; AS; AS-B
EC:6.4.1.2	acetyl-CoA carboxylase; acetyl coenzyme A carboxylase
EC:6.4.1.4	methylcrotonoyl-CoA carboxylase; methylcrotonyl coenzyme A carboxylase; beta-methylcrotonyl coenzyme A carboxylase; beta-methylcrotonyl CoA carboxylase; methylcrotonyl-CoA carboxylase
EC:1.1.1.21	aldehyde reductase
EC:1.4.3.6	amine oxidase
EC:2.3.1.41	beta-ketoacyl-[acyl-carrier-protein] synthase I
EC:3.5.1.1	asparaginase
EC:4.3.3.7	4-hydroxy-tetrahydrodipicolinate synthase
EC:4.3.1.5	phenylalanine ammonia-lyase
EC:5.4.2.1	phosphoglycerate mutase
ath01110 Biosynthesis of secondary metabolites - Arabidopsis thaliana (thale cress) (457)
EC:1.1.1.1	alcohol dehydrogenase; aldehyde reductase; ADH; alcohol dehydrogenase (NAD); aliphatic alcohol dehydrogenase; ethanol dehydrogenase; NAD-dependent alcohol dehydrogenase; NAD-specific aromatic alcohol dehydrogenase; NADH-alcohol dehydrogenase; NADH-aldehyde dehydrogenase; primary alcohol dehydrogenase; yeast alcohol dehydrogenase
EC:1.1.1.195	cinnamyl-alcohol dehydrogenase; cinnamyl alcohol dehydrogenase; CAD (ambiguous)
EC:1.1.1.219	dihydroflavonol 4-reductase; dihydrokaempferol 4-reductase; dihydromyricetin reductase; NADPH-dihydromyricetin reductase; dihydroquercetin reductase; DFR (gene name); cis-3,4-leucopelargonidin:NADP+ 4-oxidoreductase; dihydroflavanol 4-reductase (incorrect)
EC:1.1.1.23	histidinol dehydrogenase; L-histidinol dehydrogenase
EC:1.1.1.27	L-lactate dehydrogenase; lactic acid dehydrogenase; L(+)-nLDH; L-(+)-lactate dehydrogenase; L-lactic dehydrogenase; L-lactic acid dehydrogenase; lactate dehydrogenase; lactate dehydrogenase NAD+-dependent; lactic dehydrogenase; NAD+-lactate dehydrogenase
EC:1.1.1.37	malate dehydrogenase; malic dehydrogenase; L-malate dehydrogenase; NAD-L-malate dehydrogenase; malic acid dehydrogenase; NAD-dependent malic dehydrogenase; NAD-malate dehydrogenase; NAD-malic dehydrogenase; malate (NAD) dehydrogenase; NAD-dependent malate dehydrogenase; NAD-specific malate dehydrogenase; NAD-linked malate dehydrogenase; MDH; L-malate-NAD+ oxidoreductase
EC:1.1.1.42	isocitrate dehydrogenase (NADP+); oxalosuccinate decarboxylase; oxalsuccinic decarboxylase; isocitrate (NADP) dehydrogenase; isocitrate (nicotinamide adenine dinucleotide phosphate) dehydrogenase; NADP-specific isocitrate dehydrogenase; NADP-linked isocitrate dehydrogenase; NADP-dependent isocitrate dehydrogenase; NADP isocitric dehydrogenase; isocitrate dehydrogenase (NADP-dependent); NADP-depen…
EC:1.1.1.49	glucose-6-phosphate dehydrogenase (NADP+); NADP-glucose-6-phosphate dehydrogenase; Zwischenferment; D-glucose 6-phosphate dehydrogenase; glucose 6-phosphate dehydrogenase (NADP); NADP-dependent glucose 6-phosphate dehydrogenase; 6-phosphoglucose dehydrogenase; Entner-Doudoroff enzyme; glucose-6-phosphate 1-dehydrogenase; G6PDH; GPD; glucose-6-phosphate dehydrogenase
EC:1.1.1.85	3-isopropylmalate dehydrogenase; beta-isopropylmalic enzyme; beta-isopropylmalate dehydrogenase; threo-Ds-3-isopropylmalate dehydrogenase; 3-carboxy-2-hydroxy-4-methylpentanoate:NAD+ oxidoreductase
EC:1.1.1.86	ketol-acid reductoisomerase (NADP+); dihydroxyisovalerate dehydrogenase (isomerizing); acetohydroxy acid isomeroreductase; ketol acid reductoisomerase; alpha-keto-beta-hydroxylacyl reductoisomerase; 2-hydroxy-3-keto acid reductoisomerase; acetohydroxy acid reductoisomerase; acetolactate reductoisomerase; dihydroxyisovalerate (isomerizing) dehydrogenase; isomeroreductase; reductoisomerase; ketol-a…
EC:1.1.3.15	(S)-2-hydroxy-acid oxidase; hydroxy-acid oxidase A; hydroxy-acid oxidase B; glycolate oxidase; L-2-hydroxy acid oxidase; hydroxyacid oxidase A; L-alpha-hydroxy acid oxidase
EC:1.11.1.15	peroxiredoxin; thioredoxin peroxidase; tryparedoxin peroxidase; alkyl hydroperoxide reductase C22; AhpC; TrxPx; TXNPx; Prx; PRDX
EC:1.11.1.6	catalase; equilase; caperase; optidase; catalase-peroxidase; CAT
EC:1.11.1.7	peroxidase; lactoperoxidase; guaiacol peroxidase; plant peroxidase; Japanese radish peroxidase; horseradish peroxidase (HRP); soybean peroxidase (SBP); extensin peroxidase; heme peroxidase; oxyperoxidase; protoheme peroxidase; pyrocatechol peroxidase; scopoletin peroxidase; Coprinus cinereus peroxidase; Arthromyces ramosus peroxidase
EC:1.13.11.12	linoleate 13S-lipoxygenase; 13-lipoxidase; carotene oxidase; 13-lipoperoxidase; fat oxidase; 13-lipoxydase; lionoleate:O2 13-oxidoreductase
EC:1.14.11.19	anthocyanidin synthase; leucocyanidin oxygenase; leucocyanidin,2-oxoglutarate:oxygen oxidoreductase; ANS (gene name)
EC:1.14.11.9	flavanone 3-dioxygenase; naringenin 3-hydroxylase; flavanone 3-hydroxylase; flavanone 3beta-hydroxylase; flavanone synthase I; (2S)-flavanone 3-hydroxylase; naringenin,2-oxoglutarate:oxygen oxidoreductase (3-hydroxylating); F3H; flavanone,2-oxoglutarate:oxygen oxidoreductase (3-hydroxylating)
EC:1.14.17.4	aminocyclopropanecarboxylate oxidase; ACC oxidase; ethylene-forming enzyme
EC:1.2.1.12	glyceraldehyde-3-phosphate dehydrogenase (phosphorylating); triosephosphate dehydrogenase; dehydrogenase, glyceraldehyde phosphate; phosphoglyceraldehyde dehydrogenase; 3-phosphoglyceraldehyde dehydrogenase; NAD+-dependent glyceraldehyde phosphate dehydrogenase; glyceraldehyde phosphate dehydrogenase (NAD+); glyceraldehyde-3-phosphate dehydrogenase (NAD+); NADH-glyceraldehyde phosphate dehydrogen…
EC:1.2.1.3	aldehyde dehydrogenase (NAD+); CoA-independent aldehyde dehydrogenase; m-methylbenzaldehyde dehydrogenase; NAD-aldehyde dehydrogenase; NAD-dependent 4-hydroxynonenal dehydrogenase; NAD-dependent aldehyde dehydrogenase; NAD-linked aldehyde dehydrogenase; propionaldehyde dehydrogenase; aldehyde dehydrogenase (NAD)
EC:1.2.1.38	N-acetyl-gamma-glutamyl-phosphate reductase; reductase, acetyl-gamma-glutamyl phosphate; N-acetylglutamate 5-semialdehyde dehydrogenase; N-acetylglutamic gamma-semialdehyde dehydrogenase; N-acetyl-L-glutamate gamma-semialdehyde:NADP+ oxidoreductase (phosphorylating)
EC:1.2.1.8	betaine-aldehyde dehydrogenase; betaine aldehyde oxidase; BADH; betaine aldehyde dehydrogenase; BetB
EC:1.2.4.1	pyruvate dehydrogenase (acetyl-transferring); MtPDC (mitochondrial pyruvate dehydrogenase complex); pyruvate decarboxylase; pyruvate dehydrogenase; pyruvate dehydrogenase (lipoamide); pyruvate dehydrogenase complex; pyruvate:lipoamide 2-oxidoreductase (decarboxylating and acceptor-acetylating); pyruvic acid dehydrogenase; pyruvic dehydrogenase
EC:1.3.1.33	protochlorophyllide reductase; NADPH2-protochlorophyllide oxidoreductase; NADPH-protochlorophyllide oxidoreductase; NADPH-protochlorophyllide reductase; protochlorophyllide oxidoreductase (ambiguous); protochlorophyllide photooxidoreductase; light-dependent protochlorophyllide reductase
EC:1.3.3.3	coproporphyrinogen oxidase; coproporphyrinogen III oxidase; coproporphyrinogenase
EC:1.3.3.4	protoporphyrinogen oxidase; protoporphyrinogen IX oxidase; protoporphyrinogenase; PPO; Protox; HemG; HemY
EC:1.3.3.6	acyl-CoA oxidase; fatty acyl-CoA oxidase; acyl coenzyme A oxidase; fatty acyl-coenzyme A oxidase
EC:1.3.5.1	succinate dehydrogenase; succinate dehydrogenase (quinone); succinate dehydrogenase (ubiquinone); succinic dehydrogenase; complex II (ambiguous); succinate dehydrogenase complex; SDH; succinate:ubiquinone oxidoreductase
EC:1.4.4.2	glycine dehydrogenase (aminomethyl-transferring); P-protein; glycine decarboxylase; glycine-cleavage complex; glycine:lipoylprotein oxidoreductase (decarboxylating and acceptor-aminomethylating); protein P1; glycine dehydrogenase (decarboxylating); glycine cleavage system P-protein; glycine-cleavage complex P-protein
EC:1.8.1.4	dihydrolipoyl dehydrogenase; LDP-Glc; LDP-Val; dehydrolipoate dehydrogenase; diaphorase; dihydrolipoamide dehydrogenase; dihydrolipoamide:NAD+ oxidoreductase; dihydrolipoic dehydrogenase; dihydrothioctic dehydrogenase; lipoamide dehydrogenase (NADH); lipoamide oxidoreductase (NADH); lipoamide reductase; lipoamide reductase (NADH); lipoate dehydrogenase; lipoic acid dehydrogenase; lipoyl dehydroge…
EC:2.1.1.104	caffeoyl-CoA O-methyltransferase; caffeoyl coenzyme A methyltransferase; caffeoyl-CoA 3-O-methyltransferase; trans-caffeoyl-CoA 3-O-methyltransferase
EC:2.1.1.14	5-methyltetrahydropteroyltriglutamate---homocysteine S-methyltransferase; tetrahydropteroyltriglutamate methyltransferase; homocysteine methylase; methyltransferase, tetrahydropteroylglutamate-homocysteine transmethylase; methyltetrahydropteroylpolyglutamate:homocysteine methyltransferase; cobalamin-independent methionine synthase; methionine synthase (cobalamin-independent); MetE
EC:2.1.1.68	caffeate O-methyltransferase; caffeate methyltransferase; caffeate 3-O-methyltransferase; S-adenosyl-L-methionine:caffeic acid-O-methyltransferase
EC:2.1.2.1	glycine hydroxymethyltransferase; serine aldolase; threonine aldolase; serine hydroxymethylase; serine hydroxymethyltransferase; allothreonine aldolase; L-serine hydroxymethyltransferase; L-threonine aldolase; serine hydroxymethyltransferase; serine transhydroxymethylase
EC:2.1.2.10	aminomethyltransferase; S-aminomethyldihydrolipoylprotein:(6S)-tetrahydrofolate aminomethyltransferase (ammonia-forming); T-protein; glycine synthase; tetrahydrofolate aminomethyltransferase; [protein]-8-S-aminomethyldihydrolipoyllysine:tetrahydrofolate aminomethyltransferase (ammonia-forming)
EC:2.1.3.3	ornithine carbamoyltransferase; citrulline phosphorylase; ornithine transcarbamylase; OTC; carbamylphosphate-ornithine transcarbamylase; L-ornithine carbamoyltransferase; L-ornithine carbamyltransferase; L-ornithine transcarbamylase; ornithine carbamyltransferase
EC:2.2.1.1	transketolase; glycolaldehydetransferase
EC:2.2.1.6	acetolactate synthase; alpha-acetohydroxy acid synthetase; alpha-acetohydroxyacid synthase; alpha-acetolactate synthase; alpha-acetolactate synthetase; acetohydroxy acid synthetase; acetohydroxyacid synthase; acetolactate pyruvate-lyase (carboxylating); acetolactic synthetase
EC:2.3.1.74	naringenin-chalcone synthase; chalcone synthase; flavanone synthase; 6'-deoxychalcone synthase; chalcone synthetase; DOCS; CHS
EC:2.3.3.1	citrate (Si)-synthase; (R)-citric synthase; citrate oxaloacetate-lyase [(pro-3S)-CH2COO-->acetyl-CoA]
EC:2.3.3.13	2-isopropylmalate synthase; 3-carboxy-3-hydroxy-4-methylpentanoate 3-methyl-2-oxobutanoate-lyase (CoA-acetylating); alpha-isopropylmalate synthetase; alpha-isopropylmalate synthase; alpha-isopropylmalic synthetase; isopropylmalate synthase; isopropylmalate synthetase
EC:2.3.3.9	malate synthase; L-malate glyoxylate-lyase (CoA-acetylating); glyoxylate transacetylase; glyoxylate transacetase; glyoxylic transacetase; malate condensing enzyme; malate synthetase; malic synthetase; malic-condensing enzyme; acetyl-CoA:glyoxylate C-acetyltransferase (thioester-hydrolysing, carboxymethyl-forming)
EC:2.4.1.1	glycogen phosphorylase; muscle phosphorylase a and b; amylophosphorylase; polyphosphorylase; amylopectin phosphorylase; glucan phosphorylase; alpha-glucan phosphorylase; 1,4-alpha-glucan phosphorylase; glucosan phosphorylase; granulose phosphorylase; maltodextrin phosphorylase; muscle phosphorylase; myophosphorylase; potato phosphorylase; starch phosphorylase; 1,4-alpha-D-glucan:phosphate alpha-D…
EC:2.4.1.18	1,4-alpha-glucan branching enzyme; branching enzyme; amylo-(1,4->1,6)-transglycosylase; Q-enzyme; alpha-glucan-branching glycosyltransferase; amylose isomerase; enzymatic branching factor; branching glycosyltransferase; enzyme Q; glucosan transglycosylase; glycogen branching enzyme; plant branching enzyme; alpha-1,4-glucan:alpha-1,4-glucan-6-glycosyltransferase; starch branching enzyme; 1,4-alpha…
EC:2.4.1.21	starch synthase (glycosyl-transferring); ADP-glucose---starch glucosyltransferase; adenosine diphosphate glucose-starch glucosyltransferase; adenosine diphosphoglucose-starch glucosyltransferase; ADP-glucose starch synthase; ADP-glucose synthase; ADP-glucose transglucosylase; ADP-glucose-starch glucosyltransferase; ADPG starch synthetase; ADPG-starch glucosyltransferase; starch synthetase; ADP-gl…
EC:2.4.1.242	NDP-glucose---starch glucosyltransferase; granule-bound starch synthase; starch synthase II (ambiguous); waxy protein; starch granule-bound nucleoside diphosphate glucose-starch glucosyltransferase; granule-bound starch synthase I; GBSSI; granule-bound starch synthase II; GBSSII; GBSS; NDPglucose-starch glucosyltransferase
EC:2.4.2.14	amidophosphoribosyltransferase; phosphoribosyldiphosphate 5-amidotransferase; glutamine phosphoribosyldiphosphate amidotransferase; alpha-5-phosphoribosyl-1-pyrophosphate amidotransferase; 5'-phosphoribosylpyrophosphate amidotransferase; 5-phosphoribosyl-1-pyrophosphate amidotransferase; 5-phosphororibosyl-1-pyrophosphate amidotransferase; glutamine 5-phosphoribosylpyrophosphate amidotransferase;…
EC:2.5.1.1	dimethylallyltranstransferase; geranyl-diphosphate synthase; prenyltransferase; dimethylallyltransferase; DMAPP:IPP-dimethylallyltransferase; (2E,6E)-farnesyl diphosphate synthetase; diprenyltransferase; geranyl pyrophosphate synthase; geranyl pyrophosphate synthetase; trans-farnesyl pyrophosphate synthetase
EC:2.5.1.19	3-phosphoshikimate 1-carboxyvinyltransferase; 5-enolpyruvylshikimate-3-phosphate synthase; 3-enolpyruvylshikimate 5-phosphate synthase; 3-enolpyruvylshikimic acid-5-phosphate synthetase; 5'-enolpyruvylshikimate-3-phosphate synthase; 5-enolpyruvyl-3-phosphoshikimate synthase; 5-enolpyruvylshikimate-3-phosphate synthetase; 5-enolpyruvylshikimate-3-phosphoric acid synthase; enolpyruvylshikimate phos…
EC:2.5.1.47	cysteine synthase; O-acetyl-L-serine sulfhydrylase; O-acetyl-L-serine sulfohydrolase; O-acetylserine (thiol)-lyase; O-acetylserine (thiol)-lyase A; O-acetylserine sulfhydrylase; O3-acetyl-L-serine acetate-lyase (adding hydrogen-sulfide); acetylserine sulfhydrylase; cysteine synthetase; S-sulfocysteine synthase; 3-O-acetyl-L-serine:hydrogen-sulfide 2-amino-2-carboxyethyltransferase; O3-acetyl-L-se…
EC:2.5.1.54	3-deoxy-7-phosphoheptulonate synthase; 2-dehydro-3-deoxy-phosphoheptonate aldolase; 2-keto-3-deoxy-D-arabino-heptonic acid 7-phosphate synthetase; 3-deoxy-D-arabino-2-heptulosonic acid 7-phosphate synthetase; 3-deoxy-D-arabino-heptolosonate-7-phosphate synthetase; 3-deoxy-D-arabino-heptulosonate 7-phosphate synthetase; 7-phospho-2-keto-3-deoxy-D-arabino-heptonate D-erythrose-4-phosphate lyase (py…
EC:2.5.1.6	methionine adenosyltransferase; adenosylmethionine synthetase; ATP-methionine adenosyltransferase; methionine S-adenosyltransferase; methionine-activating enzyme; S-adenosyl-L-methionine synthetase; S-adenosylmethionine synthase; S-adenosylmethionine synthetase; AdoMet synthetase
EC:2.5.1.61	hydroxymethylbilane synthase; HMB-synthase; porphobilinogen deaminase; pre-uroporphyrinogen synthase; uroporphyrinogen I synthase; uroporphyrinogen I synthetase; uroporphyrinogen synthase; uroporphyrinogen synthetase; porphobilinogen ammonia-lyase (polymerizing); (4-[2-carboxyethyl]-3-[carboxymethyl]pyrrol-2-yl)methyltransferase (hydrolysing)
EC:2.5.1.9	riboflavin synthase; heavy riboflavin synthase; light riboflavin synthase; riboflavin synthetase; riboflavine synthase; riboflavine synthetase
EC:2.6.1.1	aspartate transaminase; glutamic-oxaloacetic transaminase; glutamic-aspartic transaminase; transaminase A; AAT; AspT; 2-oxoglutarate-glutamate aminotransferase; aspartate alpha-ketoglutarate transaminase; aspartate aminotransferase; aspartate-2-oxoglutarate transaminase; aspartic acid aminotransferase; aspartic aminotransferase; aspartyl aminotransferase; AST; glutamate-oxalacetate aminotransfera…
EC:2.6.1.2	alanine transaminase; glutamic-pyruvic transaminase; glutamic-alanine transaminase; GPT (ambiguous); beta-alanine aminotransferase; alanine aminotransferase; alanine-alpha-ketoglutarate aminotransferase; alanine-pyruvate aminotransferase; ALT; glutamic acid-pyruvic acid transaminase; glutamic-pyruvic aminotransferase; L-alanine aminotransferase; L-alanine transaminase; L-alanine-alpha-ketoglutara…
EC:2.7.1.1	hexokinase; hexokinase type IV glucokinase; hexokinase D; hexokinase type IV; hexokinase (phosphorylating); ATP-dependent hexokinase; glucose ATP phosphotransferase
EC:2.7.1.40	pyruvate kinase; phosphoenolpyruvate kinase; phosphoenol transphosphorylase
EC:2.7.1.90	diphosphate---fructose-6-phosphate 1-phosphotransferase; 6-phosphofructokinase (pyrophosphate); pyrophosphate-fructose 6-phosphate 1-phosphotransferase; inorganic pyrophosphate-dependent phosphofructokinase; inorganic pyrophosphate-phosphofructokinase; pyrophosphate-dependent phosphofructo-1-kinase; pyrophosphate-fructose 6-phosphate phosphotransferase
EC:2.7.2.11	glutamate 5-kinase; ATP-L-glutamate 5-phosphotransferase; ATP:gamma-L-glutamate phosphotransferase; gamma-glutamate kinase; gamma-glutamyl kinase; glutamate kinase
EC:2.7.2.3	phosphoglycerate kinase; PGK; 3-PGK; ATP-3-phospho-D-glycerate-1-phosphotransferase; ATP:D-3-phosphoglycerate 1-phosphotransferase; 3-phosphoglycerate kinase; 3-phosphoglycerate phosphokinase; 3-phosphoglyceric acid kinase; 3-phosphoglyceric acid phosphokinase; 3-phosphoglyceric kinase; glycerate 3-phosphate kinase; glycerophosphate kinase; phosphoglyceric acid kinase; phosphoglyceric kinase; pho…
EC:2.7.4.3	adenylate kinase; myokinase; 5'-AMP-kinase; adenylic kinase; adenylokinase
EC:2.7.4.6	nucleoside-diphosphate kinase; nucleoside 5'-diphosphate kinase; nucleoside diphosphate (UDP) kinase; nucleoside diphosphokinase; nucleotide phosphate kinase; UDP kinase; uridine diphosphate kinase
EC:2.7.6.1	ribose-phosphate diphosphokinase; ribose-phosphate pyrophosphokinase; PRPP synthetase; phosphoribosylpyrophosphate synthetase; PPRibP synthetase; PP-ribose P synthetase; 5-phosphoribosyl-1-pyrophosphate synthetase; 5-phosphoribose pyrophosphorylase; 5-phosphoribosyl-alpha-1-pyrophosphate synthetase; phosphoribosyl-diphosphate synthetase; phosphoribosylpyrophosphate synthase; pyrophosphoribosylpho…
EC:2.7.7.27	glucose-1-phosphate adenylyltransferase; ADP glucose pyrophosphorylase; glucose 1-phosphate adenylyltransferase; adenosine diphosphate glucose pyrophosphorylase; adenosine diphosphoglucose pyrophosphorylase; ADP-glucose pyrophosphorylase; ADP-glucose synthase; ADP-glucose synthetase; ADPG pyrophosphorylase; ADP:alpha-D-glucose-1-phosphate adenylyltransferase
EC:3.1.3.11	fructose-bisphosphatase; hexose diphosphatase; FBPase; fructose 1,6-diphosphatase; fructose 1,6-diphosphate phosphatase; D-fructose 1,6-diphosphatase; fructose 1,6-bisphosphatase; fructose diphosphatase; fructose diphosphate phosphatase; fructose bisphosphate phosphatase; fructose 1,6-bisphosphate 1-phosphatase; fructose 1,6-bisphosphate phosphatase; hexose bisphosphatase; D-fructose-1,6-bisphosp…
EC:3.1.3.25	inositol-phosphate phosphatase; myo-inositol-1(or 4)-monophosphatase; inositol 1-phosphatase; L-myo-inositol-1-phosphate phosphatase; myo-inositol 1-phosphatase; inositol phosphatase; inositol monophosphate phosphatase; inositol-1(or 4)-monophosphatase; myo-inositol-1(or 4)-phosphate phosphohydrolase; myo-inositol monophosphatase; myo-inositol-1-phosphatase
EC:3.1.4.4	phospholipase D; lipophosphodiesterase II; lecithinase D; choline phosphatase
EC:3.2.1.21	beta-glucosidase; gentiobiase; cellobiase; emulsin; elaterase; aryl-beta-glucosidase; beta-D-glucosidase; beta-glucoside glucohydrolase; arbutinase; amygdalinase; p-nitrophenyl beta-glucosidase; primeverosidase; amygdalase; linamarase; salicilinase; beta-1,6-glucosidase
EC:3.5.3.1	arginase; arginine amidinase; canavanase; L-arginase; arginine transamidinase
EC:4.1.1.1	pyruvate decarboxylase; alpha-carboxylase (ambiguous); pyruvic decarboxylase; alpha-ketoacid carboxylase; 2-oxo-acid carboxy-lyase
EC:4.1.1.15	glutamate decarboxylase; L-glutamic acid decarboxylase; L-glutamic decarboxylase; cysteic acid decarboxylase; L-glutamate alpha-decarboxylase; aspartate 1-decarboxylase; aspartic alpha-decarboxylase; L-aspartate-alpha-decarboxylase; gamma-glutamate decarboxylase; L-glutamate 1-carboxy-lyase
EC:4.1.1.37	uroporphyrinogen decarboxylase; uroporphyrinogen III decarboxylase; porphyrinogen carboxy-lyase; porphyrinogen decarboxylase; uroporphyrinogen-III carboxy-lyase
EC:4.1.1.49	phosphoenolpyruvate carboxykinase (ATP); phosphopyruvate carboxylase (ATP); phosphoenolpyruvate carboxylase (ambiguous); phosphoenolpyruvate carboxykinase (ambiguous); phosphopyruvate carboxykinase (adenosine triphosphate); PEP carboxylase (ambiguous); PEP carboxykinase (ambiguous); PEPCK (ATP); PEPK; PEPCK; phosphoenolpyruvic carboxylase (ambiguous); phosphoenolpyruvic carboxykinase (ambiguous);…
EC:4.1.2.13	fructose-bisphosphate aldolase; aldolase; fructose-1,6-bisphosphate triosephosphate-lyase; fructose diphosphate aldolase; diphosphofructose aldolase; fructose 1,6-diphosphate aldolase; ketose 1-phosphate aldolase; phosphofructoaldolase; zymohexase; fructoaldolase; fructose 1-phosphate aldolase; fructose 1-monophosphate aldolase; 1,6-diphosphofructose aldolase; SMALDO; D-fructose-1,6-bisphosphate …
EC:4.1.3.1	isocitrate lyase; isocitrase; isocitritase; isocitratase; threo-Ds-isocitrate glyoxylate-lyase; isocitrate glyoxylate-lyase
EC:4.2.1.11	phosphopyruvate hydratase; enolase; 2-phosphoglycerate dehydratase; 14-3-2-protein; nervous-system specific enolase; phosphoenolpyruvate hydratase; 2-phosphoglycerate dehydratase; 2-phosphoglyceric dehydratase; 2-phosphoglycerate enolase; gamma-enolase; 2-phospho-D-glycerate hydro-lyase
EC:4.2.1.17	enoyl-CoA hydratase; enoyl hydrase; unsaturated acyl-CoA hydratase; beta-hydroxyacyl-CoA dehydrase; beta-hydroxyacid dehydrase; acyl coenzyme A hydrase; crotonase; crotonyl hydrase; 2-octenoyl coenzyme A hydrase; enoyl coenzyme A hydratase; 2-enoyl-CoA hydratase; short-chain enoyl-CoA hydratase; ECH; trans-2-enoyl-CoA hydratase; enoyl coenzyme A hydrase (D); enoyl coenzyme A hydrase (L); short ch…
EC:4.2.1.20	tryptophan synthase; L-tryptophan synthetase; indoleglycerol phosphate aldolase; tryptophan desmolase; tryptophan synthetase; L-serine hydro-lyase (adding indoleglycerol-phosphate); L-serine hydro-lyase [adding 1-C-(indol-3-yl)glycerol 3-phosphate, L-tryptophan and glyceraldehyde-3-phosphate-forming]
EC:4.2.1.24	porphobilinogen synthase; aminolevulinate dehydratase; delta-aminolevulinate dehydratase; delta-aminolevulinic acid dehydrase; delta-aminolevulinic acid dehydratase; aminolevulinic dehydratase; delta-aminolevulinic dehydratase; 5-levulinic acid dehydratase; 5-aminolevulinate hydro-lyase (adding 5-aminolevulinate and cyclizing); hemB (gene name)
EC:4.2.1.3	aconitate hydratase; cis-aconitase; aconitase; AcnB; 2-methylaconitate hydratase; citrate(isocitrate) hydro-lyase
EC:4.2.3.1	threonine synthase; threonine synthetase; O-phospho-L-homoserine phospho-lyase (adding water)
EC:4.3.3.2	strictosidine synthase; strictosidine synthetase; STR; 3-alpha(S)-strictosidine tryptamine-lyase
EC:5.1.3.1	ribulose-phosphate 3-epimerase; phosphoribulose epimerase; erythrose-4-phosphate isomerase; phosphoketopentose 3-epimerase; xylulose phosphate 3-epimerase; phosphoketopentose epimerase; ribulose 5-phosphate 3-epimerase; D-ribulose phosphate-3-epimerase; D-ribulose 5-phosphate epimerase; D-ribulose-5-P 3-epimerase; D-xylulose-5-phosphate 3-epimerase; pentose-5-phosphate 3-epimerase
EC:5.1.3.18	GDP-mannose 3,5-epimerase; GDP-D-mannose:GDP-L-galactose epimerase; guanosine 5'-diphosphate D-mannose:guanosine 5'-diphosphate L-galactose epimerase
EC:5.3.1.1	triose-phosphate isomerase; phosphotriose isomerase; triose phosphoisomerase; triose phosphate mutase; D-glyceraldehyde-3-phosphate ketol-isomerase
EC:5.3.1.9	glucose-6-phosphate isomerase; phosphohexose isomerase; phosphohexomutase; oxoisomerase; hexosephosphate isomerase; phosphosaccharomutase; phosphoglucoisomerase; phosphohexoisomerase; phosphoglucose isomerase; glucose phosphate isomerase; hexose phosphate isomerase; D-glucose-6-phosphate ketol-isomerase
EC:5.4.2.2	phosphoglucomutase (alpha-D-glucose-1,6-bisphosphate-dependent); glucose phosphomutase; phosphoglucose mutase
EC:5.4.3.8	glutamate-1-semialdehyde 2,1-aminomutase; glutamate-1-semialdehyde aminotransferase
EC:5.5.1.6	chalcone isomerase; chalcone-flavanone isomerase; flavanone lyase (decyclizing)
EC:6.2.1.12	4-coumarate---CoA ligase; 4-coumaroyl-CoA synthetase; p-coumaroyl CoA ligase; p-coumaryl coenzyme A synthetase; p-coumaryl-CoA synthetase; p-coumaryl-CoA ligase; feruloyl CoA ligase; hydroxycinnamoyl CoA synthetase; 4-coumarate:coenzyme A ligase; caffeolyl coenzyme A synthetase; p-hydroxycinnamoyl coenzyme A synthetase; feruloyl coenzyme A synthetase; sinapoyl coenzyme A synthetase; 4-coumaryl-Co…
EC:6.2.1.4	succinate---CoA ligase (GDP-forming); succinyl-CoA synthetase (GDP-forming); succinyl coenzyme A synthetase (guanosine diphosphate-forming); succinate thiokinase; succinic thiokinase; succinyl coenzyme A synthetase; succinate-phosphorylating enzyme; P-enzyme; SCS; G-STK; succinyl coenzyme A synthetase (GDP-forming); succinyl CoA synthetase; succinyl coenzyme A synthetase
EC:6.3.3.1	phosphoribosylformylglycinamidine cyclo-ligase; phosphoribosylaminoimidazole synthetase; AIR synthetase; 5'-aminoimidazole ribonucleotide synthetase; 2-(formamido)-1-N-(5-phosphoribosyl)acetamidine cyclo-ligase (ADP-forming)
EC:6.3.4.13	phosphoribosylamine---glycine ligase; phosphoribosylglycinamide synthetase; glycinamide ribonucleotide synthetase; phosphoribosylglycineamide synthetase; glycineamide ribonucleotide synthetase; 2-amino-N-ribosylacetamide 5'-phosphate kinosynthase; 5'-phosphoribosylglycinamide synthetase; GAR
EC:6.3.5.4	asparagine synthase (glutamine-hydrolysing); asparagine synthetase (glutamine-hydrolysing); glutamine-dependent asparagine synthetase; asparagine synthetase B; AS; AS-B
EC:6.4.1.2	acetyl-CoA carboxylase; acetyl coenzyme A carboxylase
EC:1.1.1.29	glycerate dehydrogenase
EC:1.4.3.6	amine oxidase
EC:3.5.1.1	asparaginase
EC:4.3.3.7	4-hydroxy-tetrahydrodipicolinate synthase
ath01200 Carbon metabolism - Arabidopsis thaliana (thale cress) (178)
EC:1.1.1.1	alcohol dehydrogenase; aldehyde reductase; ADH; alcohol dehydrogenase (NAD); aliphatic alcohol dehydrogenase; ethanol dehydrogenase; NAD-dependent alcohol dehydrogenase; NAD-specific aromatic alcohol dehydrogenase; NADH-alcohol dehydrogenase; NADH-aldehyde dehydrogenase; primary alcohol dehydrogenase; yeast alcohol dehydrogenase
EC:1.1.1.37	malate dehydrogenase; malic dehydrogenase; L-malate dehydrogenase; NAD-L-malate dehydrogenase; malic acid dehydrogenase; NAD-dependent malic dehydrogenase; NAD-malate dehydrogenase; NAD-malic dehydrogenase; malate (NAD) dehydrogenase; NAD-dependent malate dehydrogenase; NAD-specific malate dehydrogenase; NAD-linked malate dehydrogenase; MDH; L-malate-NAD+ oxidoreductase
EC:1.1.1.39	malate dehydrogenase (decarboxylating); 'malic' enzyme; pyruvic-malic carboxylase; NAD-specific malic enzyme; NAD-malic enzyme
EC:1.1.1.40	malate dehydrogenase (oxaloacetate-decarboxylating) (NADP+); 'malic' enzyme (ambiguous); pyruvic-malic carboxylase (ambiguous); malate dehydrogenase (decarboxylating, NADP+); NADP+-linked decarboxylating malic enzyme; NADP+-malic enzyme; NADP+-specific malic enzyme; NADP+-specific malate dehydrogenase; malate dehydrogenase (NADP+, decarboxylating); L-malate:NADP+ oxidoreductase
EC:1.1.1.42	isocitrate dehydrogenase (NADP+); oxalosuccinate decarboxylase; oxalsuccinic decarboxylase; isocitrate (NADP) dehydrogenase; isocitrate (nicotinamide adenine dinucleotide phosphate) dehydrogenase; NADP-specific isocitrate dehydrogenase; NADP-linked isocitrate dehydrogenase; NADP-dependent isocitrate dehydrogenase; NADP isocitric dehydrogenase; isocitrate dehydrogenase (NADP-dependent); NADP-depen…
EC:1.1.1.49	glucose-6-phosphate dehydrogenase (NADP+); NADP-glucose-6-phosphate dehydrogenase; Zwischenferment; D-glucose 6-phosphate dehydrogenase; glucose 6-phosphate dehydrogenase (NADP); NADP-dependent glucose 6-phosphate dehydrogenase; 6-phosphoglucose dehydrogenase; Entner-Doudoroff enzyme; glucose-6-phosphate 1-dehydrogenase; G6PDH; GPD; glucose-6-phosphate dehydrogenase
EC:1.1.1.82	malate dehydrogenase (NADP+); NADP+-malic enzyme; NADP+-malate dehydrogenase; malic dehydrogenase (nicotinamide adenine dinucleotide phosphate); malate NADP+ dehydrogenase; NADP+ malate dehydrogenase; NADP+-linked malate dehydrogenase; malate dehydrogenase (NADP+)
EC:1.1.3.15	(S)-2-hydroxy-acid oxidase; hydroxy-acid oxidase A; hydroxy-acid oxidase B; glycolate oxidase; L-2-hydroxy acid oxidase; hydroxyacid oxidase A; L-alpha-hydroxy acid oxidase
EC:1.11.1.6	catalase; equilase; caperase; optidase; catalase-peroxidase; CAT
EC:1.2.1.12	glyceraldehyde-3-phosphate dehydrogenase (phosphorylating); triosephosphate dehydrogenase; dehydrogenase, glyceraldehyde phosphate; phosphoglyceraldehyde dehydrogenase; 3-phosphoglyceraldehyde dehydrogenase; NAD+-dependent glyceraldehyde phosphate dehydrogenase; glyceraldehyde phosphate dehydrogenase (NAD+); glyceraldehyde-3-phosphate dehydrogenase (NAD+); NADH-glyceraldehyde phosphate dehydrogen…
EC:1.2.1.13	glyceraldehyde-3-phosphate dehydrogenase (NADP+) (phosphorylating); triosephosphate dehydrogenase (NADP+); dehydrogenase, glyceraldehyde phosphate (nicotinamide adenine dinucleotide phosphate) (phosphorylating); glyceraldehyde phosphate dehydrogenase (nicotinamide adenine dinucleotide phosphate) (phosphorylating); NADP+-glyceraldehyde-3-phosphate dehydrogenase; NADP+-glyceraldehyde phosphate dehy…
EC:1.2.1.2	formate dehydrogenase; formate-NAD+ oxidoreductase; FDH I; FDH II; N-FDH; formic hydrogen-lyase; formate hydrogenlyase; hydrogenlyase; NAD+-linked formate dehydrogenase; NAD+-dependent formate dehydrogenase; formate dehydrogenase (NAD+); NAD+-formate dehydrogenase; formate benzyl-viologen oxidoreductase; formic acid dehydrogenase
EC:1.2.1.9	glyceraldehyde-3-phosphate dehydrogenase (NADP+); triosephosphate dehydrogenase; dehydrogenase, glyceraldehyde phosphate (nicotinamide adenine dinucleotide phosphate); glyceraldehyde phosphate dehydrogenase (NADP+); glyceraldehyde 3-phosphate dehydrogenase (NADP+); NADP+-glyceraldehyde phosphate dehydrogenase; NADP+-glyceraldehyde-3-phosphate dehydrogenase; glyceraldehyde-3-phosphate:NADP+ reduct…
EC:1.2.4.1	pyruvate dehydrogenase (acetyl-transferring); MtPDC (mitochondrial pyruvate dehydrogenase complex); pyruvate decarboxylase; pyruvate dehydrogenase; pyruvate dehydrogenase (lipoamide); pyruvate dehydrogenase complex; pyruvate:lipoamide 2-oxidoreductase (decarboxylating and acceptor-acetylating); pyruvic acid dehydrogenase; pyruvic dehydrogenase
EC:1.3.5.1	succinate dehydrogenase; succinate dehydrogenase (quinone); succinate dehydrogenase (ubiquinone); succinic dehydrogenase; complex II (ambiguous); succinate dehydrogenase complex; SDH; succinate:ubiquinone oxidoreductase
EC:1.4.1.3	glutamate dehydrogenase [NAD(P)+]; glutamic dehydrogenase; glutamate dehydrogenase [NAD(P)+]
EC:1.4.4.2	glycine dehydrogenase (aminomethyl-transferring); P-protein; glycine decarboxylase; glycine-cleavage complex; glycine:lipoylprotein oxidoreductase (decarboxylating and acceptor-aminomethylating); protein P1; glycine dehydrogenase (decarboxylating); glycine cleavage system P-protein; glycine-cleavage complex P-protein
EC:1.5.1.20	methylenetetrahydrofolate reductase [NAD(P)H]; methylenetetrahydrofolate (reduced nicotinamide adenine dinucleotide phosphate) reductase; 5,10-methylenetetrahydrofolate reductase (NADPH); 5,10-methylenetetrahydrofolic acid reductase; 5,10-CH2-H4folate reductase; methylenetetrahydrofolate reductase (NADPH2); 5-methyltetrahydrofolate:NAD+ oxidoreductase; 5-methyltetrahydrofolate:NAD+ oxidoreductase…
EC:1.8.1.4	dihydrolipoyl dehydrogenase; LDP-Glc; LDP-Val; dehydrolipoate dehydrogenase; diaphorase; dihydrolipoamide dehydrogenase; dihydrolipoamide:NAD+ oxidoreductase; dihydrolipoic dehydrogenase; dihydrothioctic dehydrogenase; lipoamide dehydrogenase (NADH); lipoamide oxidoreductase (NADH); lipoamide reductase; lipoamide reductase (NADH); lipoate dehydrogenase; lipoic acid dehydrogenase; lipoyl dehydroge…
EC:2.1.2.1	glycine hydroxymethyltransferase; serine aldolase; threonine aldolase; serine hydroxymethylase; serine hydroxymethyltransferase; allothreonine aldolase; L-serine hydroxymethyltransferase; L-threonine aldolase; serine hydroxymethyltransferase; serine transhydroxymethylase
EC:2.1.2.10	aminomethyltransferase; S-aminomethyldihydrolipoylprotein:(6S)-tetrahydrofolate aminomethyltransferase (ammonia-forming); T-protein; glycine synthase; tetrahydrofolate aminomethyltransferase; [protein]-8-S-aminomethyldihydrolipoyllysine:tetrahydrofolate aminomethyltransferase (ammonia-forming)
EC:2.2.1.1	transketolase; glycolaldehydetransferase
EC:2.3.3.1	citrate (Si)-synthase; (R)-citric synthase; citrate oxaloacetate-lyase [(pro-3S)-CH2COO-->acetyl-CoA]
EC:2.3.3.9	malate synthase; L-malate glyoxylate-lyase (CoA-acetylating); glyoxylate transacetylase; glyoxylate transacetase; glyoxylic transacetase; malate condensing enzyme; malate synthetase; malic synthetase; malic-condensing enzyme; acetyl-CoA:glyoxylate C-acetyltransferase (thioester-hydrolysing, carboxymethyl-forming)
EC:2.5.1.47	cysteine synthase; O-acetyl-L-serine sulfhydrylase; O-acetyl-L-serine sulfohydrolase; O-acetylserine (thiol)-lyase; O-acetylserine (thiol)-lyase A; O-acetylserine sulfhydrylase; O3-acetyl-L-serine acetate-lyase (adding hydrogen-sulfide); acetylserine sulfhydrylase; cysteine synthetase; S-sulfocysteine synthase; 3-O-acetyl-L-serine:hydrogen-sulfide 2-amino-2-carboxyethyltransferase; O3-acetyl-L-se…
EC:2.6.1.1	aspartate transaminase; glutamic-oxaloacetic transaminase; glutamic-aspartic transaminase; transaminase A; AAT; AspT; 2-oxoglutarate-glutamate aminotransferase; aspartate alpha-ketoglutarate transaminase; aspartate aminotransferase; aspartate-2-oxoglutarate transaminase; aspartic acid aminotransferase; aspartic aminotransferase; aspartyl aminotransferase; AST; glutamate-oxalacetate aminotransfera…
EC:2.6.1.2	alanine transaminase; glutamic-pyruvic transaminase; glutamic-alanine transaminase; GPT (ambiguous); beta-alanine aminotransferase; alanine aminotransferase; alanine-alpha-ketoglutarate aminotransferase; alanine-pyruvate aminotransferase; ALT; glutamic acid-pyruvic acid transaminase; glutamic-pyruvic aminotransferase; L-alanine aminotransferase; L-alanine transaminase; L-alanine-alpha-ketoglutara…
EC:2.6.1.52	phosphoserine transaminase; PSAT; phosphoserine aminotransferase; 3-phosphoserine aminotransferase; hydroxypyruvic phosphate-glutamic transaminase; L-phosphoserine aminotransferase; phosphohydroxypyruvate transaminase; phosphohydroxypyruvic-glutamic transaminase; 3-O-phospho-L-serine:2-oxoglutarate aminotransferase; SerC; PdxC; 3PHP transaminase
EC:2.7.1.1	hexokinase; hexokinase type IV glucokinase; hexokinase D; hexokinase type IV; hexokinase (phosphorylating); ATP-dependent hexokinase; glucose ATP phosphotransferase
EC:2.7.1.19	phosphoribulokinase; phosphopentokinase; ribulose-5-phosphate kinase; phosphopentokinase; phosphoribulokinase (phosphorylating); 5-phosphoribulose kinase; ribulose phosphate kinase; PKK; PRuK; PRK
EC:2.7.1.40	pyruvate kinase; phosphoenolpyruvate kinase; phosphoenol transphosphorylase
EC:2.7.2.3	phosphoglycerate kinase; PGK; 3-PGK; ATP-3-phospho-D-glycerate-1-phosphotransferase; ATP:D-3-phosphoglycerate 1-phosphotransferase; 3-phosphoglycerate kinase; 3-phosphoglycerate phosphokinase; 3-phosphoglyceric acid kinase; 3-phosphoglyceric acid phosphokinase; 3-phosphoglyceric kinase; glycerate 3-phosphate kinase; glycerophosphate kinase; phosphoglyceric acid kinase; phosphoglyceric kinase; pho…
EC:2.7.6.1	ribose-phosphate diphosphokinase; ribose-phosphate pyrophosphokinase; PRPP synthetase; phosphoribosylpyrophosphate synthetase; PPRibP synthetase; PP-ribose P synthetase; 5-phosphoribosyl-1-pyrophosphate synthetase; 5-phosphoribose pyrophosphorylase; 5-phosphoribosyl-alpha-1-pyrophosphate synthetase; phosphoribosyl-diphosphate synthetase; phosphoribosylpyrophosphate synthase; pyrophosphoribosylpho…
EC:2.7.9.1	pyruvate, phosphate dikinase; pyruvate, orthophosphate dikinase; pyruvate-phosphate dikinase (phosphorylating); pyruvate, phosphate dikinase; pyruvate-inorganic phosphate dikinase; pyruvate-phosphate dikinase; pyruvate-phosphate ligase; pyruvic-phosphate dikinase; pyruvic-phosphate ligase; pyruvate, Pi dikinase; PPDK
EC:3.1.3.11	fructose-bisphosphatase; hexose diphosphatase; FBPase; fructose 1,6-diphosphatase; fructose 1,6-diphosphate phosphatase; D-fructose 1,6-diphosphatase; fructose 1,6-bisphosphatase; fructose diphosphatase; fructose diphosphate phosphatase; fructose bisphosphate phosphatase; fructose 1,6-bisphosphate 1-phosphatase; fructose 1,6-bisphosphate phosphatase; hexose bisphosphatase; D-fructose-1,6-bisphosp…
EC:3.1.3.37	sedoheptulose-bisphosphatase; SBPase; sedoheptulose 1,7-diphospate phosphatase; sedoheptulose 1,7-diphosphatase; sedoheptulose diphosphatase; sedoheptulose bisphosphatase; sedoheptulose 1,7-bisphosphatase
EC:4.1.1.31	phosphoenolpyruvate carboxylase; phosphopyruvate (phosphate) carboxylase; PEP carboxylase; phosphoenolpyruvic carboxylase; PEPC; PEPCase; phosphate:oxaloacetate carboxy-lyase (phosphorylating)
EC:4.1.1.39	ribulose-bisphosphate carboxylase; D-ribulose 1,5-diphosphate carboxylase; D-ribulose-1,5-bisphosphate carboxylase; RuBP carboxylase; carboxydismutase; diphosphoribulose carboxylase; ribulose 1,5-bisphosphate carboxylase; ribulose 1,5-bisphosphate carboxylase/oxygenase; ribulose 1,5-diphosphate carboxylase; ribulose 1,5-diphosphate carboxylase/oxygenase; ribulose bisphosphate carboxylase/oxygenas…
EC:4.1.1.49	phosphoenolpyruvate carboxykinase (ATP); phosphopyruvate carboxylase (ATP); phosphoenolpyruvate carboxylase (ambiguous); phosphoenolpyruvate carboxykinase (ambiguous); phosphopyruvate carboxykinase (adenosine triphosphate); PEP carboxylase (ambiguous); PEP carboxykinase (ambiguous); PEPCK (ATP); PEPK; PEPCK; phosphoenolpyruvic carboxylase (ambiguous); phosphoenolpyruvic carboxykinase (ambiguous);…
EC:4.1.2.13	fructose-bisphosphate aldolase; aldolase; fructose-1,6-bisphosphate triosephosphate-lyase; fructose diphosphate aldolase; diphosphofructose aldolase; fructose 1,6-diphosphate aldolase; ketose 1-phosphate aldolase; phosphofructoaldolase; zymohexase; fructoaldolase; fructose 1-phosphate aldolase; fructose 1-monophosphate aldolase; 1,6-diphosphofructose aldolase; SMALDO; D-fructose-1,6-bisphosphate …
EC:4.1.3.1	isocitrate lyase; isocitrase; isocitritase; isocitratase; threo-Ds-isocitrate glyoxylate-lyase; isocitrate glyoxylate-lyase
EC:4.2.1.11	phosphopyruvate hydratase; enolase; 2-phosphoglycerate dehydratase; 14-3-2-protein; nervous-system specific enolase; phosphoenolpyruvate hydratase; 2-phosphoglycerate dehydratase; 2-phosphoglyceric dehydratase; 2-phosphoglycerate enolase; gamma-enolase; 2-phospho-D-glycerate hydro-lyase
EC:4.2.1.3	aconitate hydratase; cis-aconitase; aconitase; AcnB; 2-methylaconitate hydratase; citrate(isocitrate) hydro-lyase
EC:5.1.3.1	ribulose-phosphate 3-epimerase; phosphoribulose epimerase; erythrose-4-phosphate isomerase; phosphoketopentose 3-epimerase; xylulose phosphate 3-epimerase; phosphoketopentose epimerase; ribulose 5-phosphate 3-epimerase; D-ribulose phosphate-3-epimerase; D-ribulose 5-phosphate epimerase; D-ribulose-5-P 3-epimerase; D-xylulose-5-phosphate 3-epimerase; pentose-5-phosphate 3-epimerase
EC:5.3.1.1	triose-phosphate isomerase; phosphotriose isomerase; triose phosphoisomerase; triose phosphate mutase; D-glyceraldehyde-3-phosphate ketol-isomerase
EC:5.3.1.9	glucose-6-phosphate isomerase; phosphohexose isomerase; phosphohexomutase; oxoisomerase; hexosephosphate isomerase; phosphosaccharomutase; phosphoglucoisomerase; phosphohexoisomerase; phosphoglucose isomerase; glucose phosphate isomerase; hexose phosphate isomerase; D-glucose-6-phosphate ketol-isomerase
EC:6.2.1.4	succinate---CoA ligase (GDP-forming); succinyl-CoA synthetase (GDP-forming); succinyl coenzyme A synthetase (guanosine diphosphate-forming); succinate thiokinase; succinic thiokinase; succinyl coenzyme A synthetase; succinate-phosphorylating enzyme; P-enzyme; SCS; G-STK; succinyl coenzyme A synthetase (GDP-forming); succinyl CoA synthetase; succinyl coenzyme A synthetase
EC:6.3.4.3	formate---tetrahydrofolate ligase; formyltetrahydrofolate synthetase; 10-formyltetrahydrofolate synthetase; tetrahydrofolic formylase; tetrahydrofolate formylase
EC:6.4.1.2	acetyl-CoA carboxylase; acetyl coenzyme A carboxylase
ath00940 Phenylpropanoid biosynthesis - Arabidopsis thaliana (thale cress) (140)
EC:1.1.1.195	cinnamyl-alcohol dehydrogenase; cinnamyl alcohol dehydrogenase; CAD (ambiguous)
EC:1.11.1.15	peroxiredoxin; thioredoxin peroxidase; tryparedoxin peroxidase; alkyl hydroperoxide reductase C22; AhpC; TrxPx; TXNPx; Prx; PRDX
EC:1.11.1.7	peroxidase; lactoperoxidase; guaiacol peroxidase; plant peroxidase; Japanese radish peroxidase; horseradish peroxidase (HRP); soybean peroxidase (SBP); extensin peroxidase; heme peroxidase; oxyperoxidase; protoheme peroxidase; pyrocatechol peroxidase; scopoletin peroxidase; Coprinus cinereus peroxidase; Arthromyces ramosus peroxidase
EC:2.1.1.104	caffeoyl-CoA O-methyltransferase; caffeoyl coenzyme A methyltransferase; caffeoyl-CoA 3-O-methyltransferase; trans-caffeoyl-CoA 3-O-methyltransferase
EC:2.1.1.68	caffeate O-methyltransferase; caffeate methyltransferase; caffeate 3-O-methyltransferase; S-adenosyl-L-methionine:caffeic acid-O-methyltransferase
EC:3.2.1.21	beta-glucosidase; gentiobiase; cellobiase; emulsin; elaterase; aryl-beta-glucosidase; beta-D-glucosidase; beta-glucoside glucohydrolase; arbutinase; amygdalinase; p-nitrophenyl beta-glucosidase; primeverosidase; amygdalase; linamarase; salicilinase; beta-1,6-glucosidase
EC:6.2.1.12	4-coumarate---CoA ligase; 4-coumaroyl-CoA synthetase; p-coumaroyl CoA ligase; p-coumaryl coenzyme A synthetase; p-coumaryl-CoA synthetase; p-coumaryl-CoA ligase; feruloyl CoA ligase; hydroxycinnamoyl CoA synthetase; 4-coumarate:coenzyme A ligase; caffeolyl coenzyme A synthetase; p-hydroxycinnamoyl coenzyme A synthetase; feruloyl coenzyme A synthetase; sinapoyl coenzyme A synthetase; 4-coumaryl-Co…
ath01230 Biosynthesis of amino acids - Arabidopsis thaliana (thale cress) (124)
EC:1.1.1.23	histidinol dehydrogenase; L-histidinol dehydrogenase
EC:1.1.1.42	isocitrate dehydrogenase (NADP+); oxalosuccinate decarboxylase; oxalsuccinic decarboxylase; isocitrate (NADP) dehydrogenase; isocitrate (nicotinamide adenine dinucleotide phosphate) dehydrogenase; NADP-specific isocitrate dehydrogenase; NADP-linked isocitrate dehydrogenase; NADP-dependent isocitrate dehydrogenase; NADP isocitric dehydrogenase; isocitrate dehydrogenase (NADP-dependent); NADP-depen…
EC:1.1.1.85	3-isopropylmalate dehydrogenase; beta-isopropylmalic enzyme; beta-isopropylmalate dehydrogenase; threo-Ds-3-isopropylmalate dehydrogenase; 3-carboxy-2-hydroxy-4-methylpentanoate:NAD+ oxidoreductase
EC:1.1.1.86	ketol-acid reductoisomerase (NADP+); dihydroxyisovalerate dehydrogenase (isomerizing); acetohydroxy acid isomeroreductase; ketol acid reductoisomerase; alpha-keto-beta-hydroxylacyl reductoisomerase; 2-hydroxy-3-keto acid reductoisomerase; acetohydroxy acid reductoisomerase; acetolactate reductoisomerase; dihydroxyisovalerate (isomerizing) dehydrogenase; isomeroreductase; reductoisomerase; ketol-a…
EC:1.2.1.12	glyceraldehyde-3-phosphate dehydrogenase (phosphorylating); triosephosphate dehydrogenase; dehydrogenase, glyceraldehyde phosphate; phosphoglyceraldehyde dehydrogenase; 3-phosphoglyceraldehyde dehydrogenase; NAD+-dependent glyceraldehyde phosphate dehydrogenase; glyceraldehyde phosphate dehydrogenase (NAD+); glyceraldehyde-3-phosphate dehydrogenase (NAD+); NADH-glyceraldehyde phosphate dehydrogen…
EC:1.2.1.38	N-acetyl-gamma-glutamyl-phosphate reductase; reductase, acetyl-gamma-glutamyl phosphate; N-acetylglutamate 5-semialdehyde dehydrogenase; N-acetylglutamic gamma-semialdehyde dehydrogenase; N-acetyl-L-glutamate gamma-semialdehyde:NADP+ oxidoreductase (phosphorylating)
EC:2.1.1.14	5-methyltetrahydropteroyltriglutamate---homocysteine S-methyltransferase; tetrahydropteroyltriglutamate methyltransferase; homocysteine methylase; methyltransferase, tetrahydropteroylglutamate-homocysteine transmethylase; methyltetrahydropteroylpolyglutamate:homocysteine methyltransferase; cobalamin-independent methionine synthase; methionine synthase (cobalamin-independent); MetE
EC:2.1.2.1	glycine hydroxymethyltransferase; serine aldolase; threonine aldolase; serine hydroxymethylase; serine hydroxymethyltransferase; allothreonine aldolase; L-serine hydroxymethyltransferase; L-threonine aldolase; serine hydroxymethyltransferase; serine transhydroxymethylase
EC:2.1.3.3	ornithine carbamoyltransferase; citrulline phosphorylase; ornithine transcarbamylase; OTC; carbamylphosphate-ornithine transcarbamylase; L-ornithine carbamoyltransferase; L-ornithine carbamyltransferase; L-ornithine transcarbamylase; ornithine carbamyltransferase
EC:2.2.1.1	transketolase; glycolaldehydetransferase
EC:2.2.1.6	acetolactate synthase; alpha-acetohydroxy acid synthetase; alpha-acetohydroxyacid synthase; alpha-acetolactate synthase; alpha-acetolactate synthetase; acetohydroxy acid synthetase; acetohydroxyacid synthase; acetolactate pyruvate-lyase (carboxylating); acetolactic synthetase
EC:2.3.3.1	citrate (Si)-synthase; (R)-citric synthase; citrate oxaloacetate-lyase [(pro-3S)-CH2COO-->acetyl-CoA]
EC:2.3.3.13	2-isopropylmalate synthase; 3-carboxy-3-hydroxy-4-methylpentanoate 3-methyl-2-oxobutanoate-lyase (CoA-acetylating); alpha-isopropylmalate synthetase; alpha-isopropylmalate synthase; alpha-isopropylmalic synthetase; isopropylmalate synthase; isopropylmalate synthetase
EC:2.5.1.19	3-phosphoshikimate 1-carboxyvinyltransferase; 5-enolpyruvylshikimate-3-phosphate synthase; 3-enolpyruvylshikimate 5-phosphate synthase; 3-enolpyruvylshikimic acid-5-phosphate synthetase; 5'-enolpyruvylshikimate-3-phosphate synthase; 5-enolpyruvyl-3-phosphoshikimate synthase; 5-enolpyruvylshikimate-3-phosphate synthetase; 5-enolpyruvylshikimate-3-phosphoric acid synthase; enolpyruvylshikimate phos…
EC:2.5.1.47	cysteine synthase; O-acetyl-L-serine sulfhydrylase; O-acetyl-L-serine sulfohydrolase; O-acetylserine (thiol)-lyase; O-acetylserine (thiol)-lyase A; O-acetylserine sulfhydrylase; O3-acetyl-L-serine acetate-lyase (adding hydrogen-sulfide); acetylserine sulfhydrylase; cysteine synthetase; S-sulfocysteine synthase; 3-O-acetyl-L-serine:hydrogen-sulfide 2-amino-2-carboxyethyltransferase; O3-acetyl-L-se…
EC:2.5.1.54	3-deoxy-7-phosphoheptulonate synthase; 2-dehydro-3-deoxy-phosphoheptonate aldolase; 2-keto-3-deoxy-D-arabino-heptonic acid 7-phosphate synthetase; 3-deoxy-D-arabino-2-heptulosonic acid 7-phosphate synthetase; 3-deoxy-D-arabino-heptolosonate-7-phosphate synthetase; 3-deoxy-D-arabino-heptulosonate 7-phosphate synthetase; 7-phospho-2-keto-3-deoxy-D-arabino-heptonate D-erythrose-4-phosphate lyase (py…
EC:2.5.1.6	methionine adenosyltransferase; adenosylmethionine synthetase; ATP-methionine adenosyltransferase; methionine S-adenosyltransferase; methionine-activating enzyme; S-adenosyl-L-methionine synthetase; S-adenosylmethionine synthase; S-adenosylmethionine synthetase; AdoMet synthetase
EC:2.6.1.1	aspartate transaminase; glutamic-oxaloacetic transaminase; glutamic-aspartic transaminase; transaminase A; AAT; AspT; 2-oxoglutarate-glutamate aminotransferase; aspartate alpha-ketoglutarate transaminase; aspartate aminotransferase; aspartate-2-oxoglutarate transaminase; aspartic acid aminotransferase; aspartic aminotransferase; aspartyl aminotransferase; AST; glutamate-oxalacetate aminotransfera…
EC:2.6.1.2	alanine transaminase; glutamic-pyruvic transaminase; glutamic-alanine transaminase; GPT (ambiguous); beta-alanine aminotransferase; alanine aminotransferase; alanine-alpha-ketoglutarate aminotransferase; alanine-pyruvate aminotransferase; ALT; glutamic acid-pyruvic acid transaminase; glutamic-pyruvic aminotransferase; L-alanine aminotransferase; L-alanine transaminase; L-alanine-alpha-ketoglutara…
EC:2.6.1.52	phosphoserine transaminase; PSAT; phosphoserine aminotransferase; 3-phosphoserine aminotransferase; hydroxypyruvic phosphate-glutamic transaminase; L-phosphoserine aminotransferase; phosphohydroxypyruvate transaminase; phosphohydroxypyruvic-glutamic transaminase; 3-O-phospho-L-serine:2-oxoglutarate aminotransferase; SerC; PdxC; 3PHP transaminase
EC:2.7.1.40	pyruvate kinase; phosphoenolpyruvate kinase; phosphoenol transphosphorylase
EC:2.7.2.11	glutamate 5-kinase; ATP-L-glutamate 5-phosphotransferase; ATP:gamma-L-glutamate phosphotransferase; gamma-glutamate kinase; gamma-glutamyl kinase; glutamate kinase
EC:2.7.2.3	phosphoglycerate kinase; PGK; 3-PGK; ATP-3-phospho-D-glycerate-1-phosphotransferase; ATP:D-3-phosphoglycerate 1-phosphotransferase; 3-phosphoglycerate kinase; 3-phosphoglycerate phosphokinase; 3-phosphoglyceric acid kinase; 3-phosphoglyceric acid phosphokinase; 3-phosphoglyceric kinase; glycerate 3-phosphate kinase; glycerophosphate kinase; phosphoglyceric acid kinase; phosphoglyceric kinase; pho…
EC:2.7.6.1	ribose-phosphate diphosphokinase; ribose-phosphate pyrophosphokinase; PRPP synthetase; phosphoribosylpyrophosphate synthetase; PPRibP synthetase; PP-ribose P synthetase; 5-phosphoribosyl-1-pyrophosphate synthetase; 5-phosphoribose pyrophosphorylase; 5-phosphoribosyl-alpha-1-pyrophosphate synthetase; phosphoribosyl-diphosphate synthetase; phosphoribosylpyrophosphate synthase; pyrophosphoribosylpho…
EC:3.1.3.25	inositol-phosphate phosphatase; myo-inositol-1(or 4)-monophosphatase; inositol 1-phosphatase; L-myo-inositol-1-phosphate phosphatase; myo-inositol 1-phosphatase; inositol phosphatase; inositol monophosphate phosphatase; inositol-1(or 4)-monophosphatase; myo-inositol-1(or 4)-phosphate phosphohydrolase; myo-inositol monophosphatase; myo-inositol-1-phosphatase
EC:3.5.3.1	arginase; arginine amidinase; canavanase; L-arginase; arginine transamidinase
EC:4.1.2.13	fructose-bisphosphate aldolase; aldolase; fructose-1,6-bisphosphate triosephosphate-lyase; fructose diphosphate aldolase; diphosphofructose aldolase; fructose 1,6-diphosphate aldolase; ketose 1-phosphate aldolase; phosphofructoaldolase; zymohexase; fructoaldolase; fructose 1-phosphate aldolase; fructose 1-monophosphate aldolase; 1,6-diphosphofructose aldolase; SMALDO; D-fructose-1,6-bisphosphate …
EC:4.2.1.11	phosphopyruvate hydratase; enolase; 2-phosphoglycerate dehydratase; 14-3-2-protein; nervous-system specific enolase; phosphoenolpyruvate hydratase; 2-phosphoglycerate dehydratase; 2-phosphoglyceric dehydratase; 2-phosphoglycerate enolase; gamma-enolase; 2-phospho-D-glycerate hydro-lyase
EC:4.2.1.20	tryptophan synthase; L-tryptophan synthetase; indoleglycerol phosphate aldolase; tryptophan desmolase; tryptophan synthetase; L-serine hydro-lyase (adding indoleglycerol-phosphate); L-serine hydro-lyase [adding 1-C-(indol-3-yl)glycerol 3-phosphate, L-tryptophan and glyceraldehyde-3-phosphate-forming]
EC:4.2.1.3	aconitate hydratase; cis-aconitase; aconitase; AcnB; 2-methylaconitate hydratase; citrate(isocitrate) hydro-lyase
EC:4.2.3.1	threonine synthase; threonine synthetase; O-phospho-L-homoserine phospho-lyase (adding water)
EC:5.1.3.1	ribulose-phosphate 3-epimerase; phosphoribulose epimerase; erythrose-4-phosphate isomerase; phosphoketopentose 3-epimerase; xylulose phosphate 3-epimerase; phosphoketopentose epimerase; ribulose 5-phosphate 3-epimerase; D-ribulose phosphate-3-epimerase; D-ribulose 5-phosphate epimerase; D-ribulose-5-P 3-epimerase; D-xylulose-5-phosphate 3-epimerase; pentose-5-phosphate 3-epimerase
EC:5.3.1.1	triose-phosphate isomerase; phosphotriose isomerase; triose phosphoisomerase; triose phosphate mutase; D-glyceraldehyde-3-phosphate ketol-isomerase
EC:6.3.1.2	glutamine synthetase; glutamate---ammonia ligase; glutamylhydroxamic synthetase; L-glutamine synthetase; GS
ath00500 Starch and sucrose metabolism - Arabidopsis thaliana (thale cress) (103)
EC:2.4.1.1	glycogen phosphorylase; muscle phosphorylase a and b; amylophosphorylase; polyphosphorylase; amylopectin phosphorylase; glucan phosphorylase; alpha-glucan phosphorylase; 1,4-alpha-glucan phosphorylase; glucosan phosphorylase; granulose phosphorylase; maltodextrin phosphorylase; muscle phosphorylase; myophosphorylase; potato phosphorylase; starch phosphorylase; 1,4-alpha-D-glucan:phosphate alpha-D…
EC:2.4.1.13	sucrose synthase; UDPglucose-fructose glucosyltransferase; sucrose synthetase; sucrose-UDP glucosyltransferase; sucrose-uridine diphosphate glucosyltransferase; uridine diphosphoglucose-fructose glucosyltransferase; NDP-glucose:D-fructose 2-alpha-D-glucosyltransferase
EC:2.4.1.18	1,4-alpha-glucan branching enzyme; branching enzyme; amylo-(1,4->1,6)-transglycosylase; Q-enzyme; alpha-glucan-branching glycosyltransferase; amylose isomerase; enzymatic branching factor; branching glycosyltransferase; enzyme Q; glucosan transglycosylase; glycogen branching enzyme; plant branching enzyme; alpha-1,4-glucan:alpha-1,4-glucan-6-glycosyltransferase; starch branching enzyme; 1,4-alpha…
EC:2.4.1.21	starch synthase (glycosyl-transferring); ADP-glucose---starch glucosyltransferase; adenosine diphosphate glucose-starch glucosyltransferase; adenosine diphosphoglucose-starch glucosyltransferase; ADP-glucose starch synthase; ADP-glucose synthase; ADP-glucose transglucosylase; ADP-glucose-starch glucosyltransferase; ADPG starch synthetase; ADPG-starch glucosyltransferase; starch synthetase; ADP-gl…
EC:2.4.1.242	NDP-glucose---starch glucosyltransferase; granule-bound starch synthase; starch synthase II (ambiguous); waxy protein; starch granule-bound nucleoside diphosphate glucose-starch glucosyltransferase; granule-bound starch synthase I; GBSSI; granule-bound starch synthase II; GBSSII; GBSS; NDPglucose-starch glucosyltransferase
EC:2.4.1.25	4-alpha-glucanotransferase; disproportionating enzyme; dextrin glycosyltransferase; D-enzyme; debranching enzyme maltodextrin glycosyltransferase; amylomaltase; dextrin transglycosylase; 1,4-alpha-D-glucan:1,4-alpha-D-glucan 4-alpha-D-glycosyltransferase
EC:2.7.1.1	hexokinase; hexokinase type IV glucokinase; hexokinase D; hexokinase type IV; hexokinase (phosphorylating); ATP-dependent hexokinase; glucose ATP phosphotransferase
EC:2.7.1.4	fructokinase; fructokinase (phosphorylating); D-fructokinase; D-fructose(D-mannose)kinase
EC:2.7.7.27	glucose-1-phosphate adenylyltransferase; ADP glucose pyrophosphorylase; glucose 1-phosphate adenylyltransferase; adenosine diphosphate glucose pyrophosphorylase; adenosine diphosphoglucose pyrophosphorylase; ADP-glucose pyrophosphorylase; ADP-glucose synthase; ADP-glucose synthetase; ADPG pyrophosphorylase; ADP:alpha-D-glucose-1-phosphate adenylyltransferase
EC:2.7.7.9	UTP---glucose-1-phosphate uridylyltransferase; UDP glucose pyrophosphorylase; glucose-1-phosphate uridylyltransferase; UDPG phosphorylase; UDPG pyrophosphorylase; uridine 5'-diphosphoglucose pyrophosphorylase; uridine diphosphoglucose pyrophosphorylase; uridine diphosphate-D-glucose pyrophosphorylase; uridine-diphosphate glucose pyrophosphorylase
EC:3.2.1.1	alpha-amylase; glycogenase; alpha amylase, alpha-amylase; endoamylase; Taka-amylase A; 1,4-alpha-D-glucan glucanohydrolase
EC:3.2.1.2	beta-amylase; saccharogen amylase; glycogenase; beta amylase, beta-amylase; 1,4-alpha-D-glucan maltohydrolase
EC:3.2.1.20	alpha-glucosidase; maltase; glucoinvertase; glucosidosucrase; maltase-glucoamylase; alpha-glucopyranosidase; glucosidoinvertase; alpha-D-glucosidase; alpha-glucoside hydrolase; alpha-1,4-glucosidase
EC:3.2.1.21	beta-glucosidase; gentiobiase; cellobiase; emulsin; elaterase; aryl-beta-glucosidase; beta-D-glucosidase; beta-glucoside glucohydrolase; arbutinase; amygdalinase; p-nitrophenyl beta-glucosidase; primeverosidase; amygdalase; linamarase; salicilinase; beta-1,6-glucosidase
EC:3.2.1.26	beta-fructofuranosidase; invertase; saccharase; glucosucrase; beta-h-fructosidase; beta-fructosidase; invertin; sucrase; maxinvert L 1000; fructosylinvertase; alkaline invertase; acid invertase
EC:3.2.1.39	glucan endo-1,3-beta-D-glucosidase; endo-1,3-beta-glucanase; laminarinase; laminaranase; oligo-1,3-glucosidase; endo-1,3-beta-glucanase; callase; beta-1,3-glucanase; kitalase; 1,3-beta-D-glucan 3-glucanohydrolase; endo-(1,3)-beta-D-glucanase; (1->3)-beta-glucan 3-glucanohydrolase; endo-1,3-beta-D-glucanase; endo-1,3-beta-glucosidase; 1,3-beta-D-glucan glucanohydrolase
EC:5.3.1.9	glucose-6-phosphate isomerase; phosphohexose isomerase; phosphohexomutase; oxoisomerase; hexosephosphate isomerase; phosphosaccharomutase; phosphoglucoisomerase; phosphohexoisomerase; phosphoglucose isomerase; glucose phosphate isomerase; hexose phosphate isomerase; D-glucose-6-phosphate ketol-isomerase
EC:5.4.2.2	phosphoglucomutase (alpha-D-glucose-1,6-bisphosphate-dependent); glucose phosphomutase; phosphoglucose mutase
ath00010 Glycolysis / Gluconeogenesis - Arabidopsis thaliana (thale cress) (85)
EC:1.1.1.1	alcohol dehydrogenase; aldehyde reductase; ADH; alcohol dehydrogenase (NAD); aliphatic alcohol dehydrogenase; ethanol dehydrogenase; NAD-dependent alcohol dehydrogenase; NAD-specific aromatic alcohol dehydrogenase; NADH-alcohol dehydrogenase; NADH-aldehyde dehydrogenase; primary alcohol dehydrogenase; yeast alcohol dehydrogenase
EC:1.1.1.27	L-lactate dehydrogenase; lactic acid dehydrogenase; L(+)-nLDH; L-(+)-lactate dehydrogenase; L-lactic dehydrogenase; L-lactic acid dehydrogenase; lactate dehydrogenase; lactate dehydrogenase NAD+-dependent; lactic dehydrogenase; NAD+-lactate dehydrogenase
EC:1.2.1.12	glyceraldehyde-3-phosphate dehydrogenase (phosphorylating); triosephosphate dehydrogenase; dehydrogenase, glyceraldehyde phosphate; phosphoglyceraldehyde dehydrogenase; 3-phosphoglyceraldehyde dehydrogenase; NAD+-dependent glyceraldehyde phosphate dehydrogenase; glyceraldehyde phosphate dehydrogenase (NAD+); glyceraldehyde-3-phosphate dehydrogenase (NAD+); NADH-glyceraldehyde phosphate dehydrogen…
EC:1.2.1.3	aldehyde dehydrogenase (NAD+); CoA-independent aldehyde dehydrogenase; m-methylbenzaldehyde dehydrogenase; NAD-aldehyde dehydrogenase; NAD-dependent 4-hydroxynonenal dehydrogenase; NAD-dependent aldehyde dehydrogenase; NAD-linked aldehyde dehydrogenase; propionaldehyde dehydrogenase; aldehyde dehydrogenase (NAD)
EC:1.2.1.8	betaine-aldehyde dehydrogenase; betaine aldehyde oxidase; BADH; betaine aldehyde dehydrogenase; BetB
EC:1.2.1.9	glyceraldehyde-3-phosphate dehydrogenase (NADP+); triosephosphate dehydrogenase; dehydrogenase, glyceraldehyde phosphate (nicotinamide adenine dinucleotide phosphate); glyceraldehyde phosphate dehydrogenase (NADP+); glyceraldehyde 3-phosphate dehydrogenase (NADP+); NADP+-glyceraldehyde phosphate dehydrogenase; NADP+-glyceraldehyde-3-phosphate dehydrogenase; glyceraldehyde-3-phosphate:NADP+ reduct…
EC:1.2.4.1	pyruvate dehydrogenase (acetyl-transferring); MtPDC (mitochondrial pyruvate dehydrogenase complex); pyruvate decarboxylase; pyruvate dehydrogenase; pyruvate dehydrogenase (lipoamide); pyruvate dehydrogenase complex; pyruvate:lipoamide 2-oxidoreductase (decarboxylating and acceptor-acetylating); pyruvic acid dehydrogenase; pyruvic dehydrogenase
EC:1.8.1.4	dihydrolipoyl dehydrogenase; LDP-Glc; LDP-Val; dehydrolipoate dehydrogenase; diaphorase; dihydrolipoamide dehydrogenase; dihydrolipoamide:NAD+ oxidoreductase; dihydrolipoic dehydrogenase; dihydrothioctic dehydrogenase; lipoamide dehydrogenase (NADH); lipoamide oxidoreductase (NADH); lipoamide reductase; lipoamide reductase (NADH); lipoate dehydrogenase; lipoic acid dehydrogenase; lipoyl dehydroge…
EC:2.7.1.1	hexokinase; hexokinase type IV glucokinase; hexokinase D; hexokinase type IV; hexokinase (phosphorylating); ATP-dependent hexokinase; glucose ATP phosphotransferase
EC:2.7.1.40	pyruvate kinase; phosphoenolpyruvate kinase; phosphoenol transphosphorylase
EC:2.7.1.90	diphosphate---fructose-6-phosphate 1-phosphotransferase; 6-phosphofructokinase (pyrophosphate); pyrophosphate-fructose 6-phosphate 1-phosphotransferase; inorganic pyrophosphate-dependent phosphofructokinase; inorganic pyrophosphate-phosphofructokinase; pyrophosphate-dependent phosphofructo-1-kinase; pyrophosphate-fructose 6-phosphate phosphotransferase
EC:2.7.2.3	phosphoglycerate kinase; PGK; 3-PGK; ATP-3-phospho-D-glycerate-1-phosphotransferase; ATP:D-3-phosphoglycerate 1-phosphotransferase; 3-phosphoglycerate kinase; 3-phosphoglycerate phosphokinase; 3-phosphoglyceric acid kinase; 3-phosphoglyceric acid phosphokinase; 3-phosphoglyceric kinase; glycerate 3-phosphate kinase; glycerophosphate kinase; phosphoglyceric acid kinase; phosphoglyceric kinase; pho…
EC:3.1.3.11	fructose-bisphosphatase; hexose diphosphatase; FBPase; fructose 1,6-diphosphatase; fructose 1,6-diphosphate phosphatase; D-fructose 1,6-diphosphatase; fructose 1,6-bisphosphatase; fructose diphosphatase; fructose diphosphate phosphatase; fructose bisphosphate phosphatase; fructose 1,6-bisphosphate 1-phosphatase; fructose 1,6-bisphosphate phosphatase; hexose bisphosphatase; D-fructose-1,6-bisphosp…
EC:4.1.1.1	pyruvate decarboxylase; alpha-carboxylase (ambiguous); pyruvic decarboxylase; alpha-ketoacid carboxylase; 2-oxo-acid carboxy-lyase
EC:4.1.1.49	phosphoenolpyruvate carboxykinase (ATP); phosphopyruvate carboxylase (ATP); phosphoenolpyruvate carboxylase (ambiguous); phosphoenolpyruvate carboxykinase (ambiguous); phosphopyruvate carboxykinase (adenosine triphosphate); PEP carboxylase (ambiguous); PEP carboxykinase (ambiguous); PEPCK (ATP); PEPK; PEPCK; phosphoenolpyruvic carboxylase (ambiguous); phosphoenolpyruvic carboxykinase (ambiguous);…
EC:4.1.2.13	fructose-bisphosphate aldolase; aldolase; fructose-1,6-bisphosphate triosephosphate-lyase; fructose diphosphate aldolase; diphosphofructose aldolase; fructose 1,6-diphosphate aldolase; ketose 1-phosphate aldolase; phosphofructoaldolase; zymohexase; fructoaldolase; fructose 1-phosphate aldolase; fructose 1-monophosphate aldolase; 1,6-diphosphofructose aldolase; SMALDO; D-fructose-1,6-bisphosphate …
EC:4.2.1.11	phosphopyruvate hydratase; enolase; 2-phosphoglycerate dehydratase; 14-3-2-protein; nervous-system specific enolase; phosphoenolpyruvate hydratase; 2-phosphoglycerate dehydratase; 2-phosphoglyceric dehydratase; 2-phosphoglycerate enolase; gamma-enolase; 2-phospho-D-glycerate hydro-lyase
EC:5.3.1.1	triose-phosphate isomerase; phosphotriose isomerase; triose phosphoisomerase; triose phosphate mutase; D-glyceraldehyde-3-phosphate ketol-isomerase
EC:5.3.1.9	glucose-6-phosphate isomerase; phosphohexose isomerase; phosphohexomutase; oxoisomerase; hexosephosphate isomerase; phosphosaccharomutase; phosphoglucoisomerase; phosphohexoisomerase; phosphoglucose isomerase; glucose phosphate isomerase; hexose phosphate isomerase; D-glucose-6-phosphate ketol-isomerase
EC:5.4.2.2	phosphoglucomutase (alpha-D-glucose-1,6-bisphosphate-dependent); glucose phosphomutase; phosphoglucose mutase
ath00480 Glutathione metabolism - Arabidopsis thaliana (thale cress) (84)
EC:1.1.1.42	isocitrate dehydrogenase (NADP+); oxalosuccinate decarboxylase; oxalsuccinic decarboxylase; isocitrate (NADP) dehydrogenase; isocitrate (nicotinamide adenine dinucleotide phosphate) dehydrogenase; NADP-specific isocitrate dehydrogenase; NADP-linked isocitrate dehydrogenase; NADP-dependent isocitrate dehydrogenase; NADP isocitric dehydrogenase; isocitrate dehydrogenase (NADP-dependent); NADP-depen…
EC:1.1.1.49	glucose-6-phosphate dehydrogenase (NADP+); NADP-glucose-6-phosphate dehydrogenase; Zwischenferment; D-glucose 6-phosphate dehydrogenase; glucose 6-phosphate dehydrogenase (NADP); NADP-dependent glucose 6-phosphate dehydrogenase; 6-phosphoglucose dehydrogenase; Entner-Doudoroff enzyme; glucose-6-phosphate 1-dehydrogenase; G6PDH; GPD; glucose-6-phosphate dehydrogenase
EC:1.11.1.11	L-ascorbate peroxidase; L-ascorbic acid peroxidase; L-ascorbic acid-specific peroxidase; ascorbate peroxidase; ascorbic acid peroxidase
EC:1.11.1.9	glutathione peroxidase; GSH peroxidase; selenium-glutathione peroxidase; reduced glutathione peroxidase
EC:1.8.1.7	glutathione-disulfide reductase; glutathione reductase; glutathione reductase (NADPH); NADPH-glutathione reductase; GSH reductase; GSSG reductase; NADPH-GSSG reductase; glutathione S-reductase; NADPH:oxidized-glutathione oxidoreductase
EC:2.5.1.16	spermidine synthase; aminopropyltransferase; putrescine aminopropyltransferase; spermidine synthetase; SpeE; S-adenosylmethioninamine:putrescine 3-aminopropyltransferase
EC:2.5.1.18	glutathione transferase; glutathione S-transferase; glutathione S-alkyltransferase; glutathione S-aryltransferase; S-(hydroxyalkyl)glutathione lyase; glutathione S-aralkyltransferase; glutathione S-alkyl transferase; GST
EC:3.4.11.1	leucyl aminopeptidase; leucine aminopeptidase; leucyl peptidase; peptidase S; cytosol aminopeptidase; cathepsin III; L-leucine aminopeptidase; leucinaminopeptidase; leucinamide aminopeptidase; FTBL proteins; proteinates FTBL; aminopeptidase II; aminopeptidase III; aminopeptidase I
EC:6.3.2.2	glutamate---cysteine ligase; gamma-glutamylcysteine synthetase; gamma-glutamyl-L-cysteine synthetase; gamma-glutamylcysteinyl synthetase
EC:1.11.1.12	phospholipid-hydroperoxide glutathione peroxidase
ath00710 Carbon fixation in photosynthetic organisms - Arabidopsis thaliana (thale cress) (65)
EC:1.1.1.37	malate dehydrogenase; malic dehydrogenase; L-malate dehydrogenase; NAD-L-malate dehydrogenase; malic acid dehydrogenase; NAD-dependent malic dehydrogenase; NAD-malate dehydrogenase; NAD-malic dehydrogenase; malate (NAD) dehydrogenase; NAD-dependent malate dehydrogenase; NAD-specific malate dehydrogenase; NAD-linked malate dehydrogenase; MDH; L-malate-NAD+ oxidoreductase
EC:1.1.1.39	malate dehydrogenase (decarboxylating); 'malic' enzyme; pyruvic-malic carboxylase; NAD-specific malic enzyme; NAD-malic enzyme
EC:1.1.1.40	malate dehydrogenase (oxaloacetate-decarboxylating) (NADP+); 'malic' enzyme (ambiguous); pyruvic-malic carboxylase (ambiguous); malate dehydrogenase (decarboxylating, NADP+); NADP+-linked decarboxylating malic enzyme; NADP+-malic enzyme; NADP+-specific malic enzyme; NADP+-specific malate dehydrogenase; malate dehydrogenase (NADP+, decarboxylating); L-malate:NADP+ oxidoreductase
EC:1.1.1.82	malate dehydrogenase (NADP+); NADP+-malic enzyme; NADP+-malate dehydrogenase; malic dehydrogenase (nicotinamide adenine dinucleotide phosphate); malate NADP+ dehydrogenase; NADP+ malate dehydrogenase; NADP+-linked malate dehydrogenase; malate dehydrogenase (NADP+)
EC:1.2.1.12	glyceraldehyde-3-phosphate dehydrogenase (phosphorylating); triosephosphate dehydrogenase; dehydrogenase, glyceraldehyde phosphate; phosphoglyceraldehyde dehydrogenase; 3-phosphoglyceraldehyde dehydrogenase; NAD+-dependent glyceraldehyde phosphate dehydrogenase; glyceraldehyde phosphate dehydrogenase (NAD+); glyceraldehyde-3-phosphate dehydrogenase (NAD+); NADH-glyceraldehyde phosphate dehydrogen…
EC:1.2.1.13	glyceraldehyde-3-phosphate dehydrogenase (NADP+) (phosphorylating); triosephosphate dehydrogenase (NADP+); dehydrogenase, glyceraldehyde phosphate (nicotinamide adenine dinucleotide phosphate) (phosphorylating); glyceraldehyde phosphate dehydrogenase (nicotinamide adenine dinucleotide phosphate) (phosphorylating); NADP+-glyceraldehyde-3-phosphate dehydrogenase; NADP+-glyceraldehyde phosphate dehy…
EC:2.2.1.1	transketolase; glycolaldehydetransferase
EC:2.6.1.1	aspartate transaminase; glutamic-oxaloacetic transaminase; glutamic-aspartic transaminase; transaminase A; AAT; AspT; 2-oxoglutarate-glutamate aminotransferase; aspartate alpha-ketoglutarate transaminase; aspartate aminotransferase; aspartate-2-oxoglutarate transaminase; aspartic acid aminotransferase; aspartic aminotransferase; aspartyl aminotransferase; AST; glutamate-oxalacetate aminotransfera…
EC:2.6.1.2	alanine transaminase; glutamic-pyruvic transaminase; glutamic-alanine transaminase; GPT (ambiguous); beta-alanine aminotransferase; alanine aminotransferase; alanine-alpha-ketoglutarate aminotransferase; alanine-pyruvate aminotransferase; ALT; glutamic acid-pyruvic acid transaminase; glutamic-pyruvic aminotransferase; L-alanine aminotransferase; L-alanine transaminase; L-alanine-alpha-ketoglutara…
EC:2.7.1.19	phosphoribulokinase; phosphopentokinase; ribulose-5-phosphate kinase; phosphopentokinase; phosphoribulokinase (phosphorylating); 5-phosphoribulose kinase; ribulose phosphate kinase; PKK; PRuK; PRK
EC:2.7.2.3	phosphoglycerate kinase; PGK; 3-PGK; ATP-3-phospho-D-glycerate-1-phosphotransferase; ATP:D-3-phosphoglycerate 1-phosphotransferase; 3-phosphoglycerate kinase; 3-phosphoglycerate phosphokinase; 3-phosphoglyceric acid kinase; 3-phosphoglyceric acid phosphokinase; 3-phosphoglyceric kinase; glycerate 3-phosphate kinase; glycerophosphate kinase; phosphoglyceric acid kinase; phosphoglyceric kinase; pho…
EC:2.7.9.1	pyruvate, phosphate dikinase; pyruvate, orthophosphate dikinase; pyruvate-phosphate dikinase (phosphorylating); pyruvate, phosphate dikinase; pyruvate-inorganic phosphate dikinase; pyruvate-phosphate dikinase; pyruvate-phosphate ligase; pyruvic-phosphate dikinase; pyruvic-phosphate ligase; pyruvate, Pi dikinase; PPDK
EC:3.1.3.11	fructose-bisphosphatase; hexose diphosphatase; FBPase; fructose 1,6-diphosphatase; fructose 1,6-diphosphate phosphatase; D-fructose 1,6-diphosphatase; fructose 1,6-bisphosphatase; fructose diphosphatase; fructose diphosphate phosphatase; fructose bisphosphate phosphatase; fructose 1,6-bisphosphate 1-phosphatase; fructose 1,6-bisphosphate phosphatase; hexose bisphosphatase; D-fructose-1,6-bisphosp…
EC:3.1.3.37	sedoheptulose-bisphosphatase; SBPase; sedoheptulose 1,7-diphospate phosphatase; sedoheptulose 1,7-diphosphatase; sedoheptulose diphosphatase; sedoheptulose bisphosphatase; sedoheptulose 1,7-bisphosphatase
EC:4.1.1.31	phosphoenolpyruvate carboxylase; phosphopyruvate (phosphate) carboxylase; PEP carboxylase; phosphoenolpyruvic carboxylase; PEPC; PEPCase; phosphate:oxaloacetate carboxy-lyase (phosphorylating)
EC:4.1.1.39	ribulose-bisphosphate carboxylase; D-ribulose 1,5-diphosphate carboxylase; D-ribulose-1,5-bisphosphate carboxylase; RuBP carboxylase; carboxydismutase; diphosphoribulose carboxylase; ribulose 1,5-bisphosphate carboxylase; ribulose 1,5-bisphosphate carboxylase/oxygenase; ribulose 1,5-diphosphate carboxylase; ribulose 1,5-diphosphate carboxylase/oxygenase; ribulose bisphosphate carboxylase/oxygenas…
EC:4.1.1.49	phosphoenolpyruvate carboxykinase (ATP); phosphopyruvate carboxylase (ATP); phosphoenolpyruvate carboxylase (ambiguous); phosphoenolpyruvate carboxykinase (ambiguous); phosphopyruvate carboxykinase (adenosine triphosphate); PEP carboxylase (ambiguous); PEP carboxykinase (ambiguous); PEPCK (ATP); PEPK; PEPCK; phosphoenolpyruvic carboxylase (ambiguous); phosphoenolpyruvic carboxykinase (ambiguous);…
EC:4.1.2.13	fructose-bisphosphate aldolase; aldolase; fructose-1,6-bisphosphate triosephosphate-lyase; fructose diphosphate aldolase; diphosphofructose aldolase; fructose 1,6-diphosphate aldolase; ketose 1-phosphate aldolase; phosphofructoaldolase; zymohexase; fructoaldolase; fructose 1-phosphate aldolase; fructose 1-monophosphate aldolase; 1,6-diphosphofructose aldolase; SMALDO; D-fructose-1,6-bisphosphate …
EC:5.1.3.1	ribulose-phosphate 3-epimerase; phosphoribulose epimerase; erythrose-4-phosphate isomerase; phosphoketopentose 3-epimerase; xylulose phosphate 3-epimerase; phosphoketopentose epimerase; ribulose 5-phosphate 3-epimerase; D-ribulose phosphate-3-epimerase; D-ribulose 5-phosphate epimerase; D-ribulose-5-P 3-epimerase; D-xylulose-5-phosphate 3-epimerase; pentose-5-phosphate 3-epimerase
EC:5.3.1.1	triose-phosphate isomerase; phosphotriose isomerase; triose phosphoisomerase; triose phosphate mutase; D-glyceraldehyde-3-phosphate ketol-isomerase
ath00620 Pyruvate metabolism - Arabidopsis thaliana (thale cress) (64)
EC:1.1.1.27	L-lactate dehydrogenase; lactic acid dehydrogenase; L(+)-nLDH; L-(+)-lactate dehydrogenase; L-lactic dehydrogenase; L-lactic acid dehydrogenase; lactate dehydrogenase; lactate dehydrogenase NAD+-dependent; lactic dehydrogenase; NAD+-lactate dehydrogenase
EC:1.1.1.37	malate dehydrogenase; malic dehydrogenase; L-malate dehydrogenase; NAD-L-malate dehydrogenase; malic acid dehydrogenase; NAD-dependent malic dehydrogenase; NAD-malate dehydrogenase; NAD-malic dehydrogenase; malate (NAD) dehydrogenase; NAD-dependent malate dehydrogenase; NAD-specific malate dehydrogenase; NAD-linked malate dehydrogenase; MDH; L-malate-NAD+ oxidoreductase
EC:1.1.1.39	malate dehydrogenase (decarboxylating); 'malic' enzyme; pyruvic-malic carboxylase; NAD-specific malic enzyme; NAD-malic enzyme
EC:1.1.1.40	malate dehydrogenase (oxaloacetate-decarboxylating) (NADP+); 'malic' enzyme (ambiguous); pyruvic-malic carboxylase (ambiguous); malate dehydrogenase (decarboxylating, NADP+); NADP+-linked decarboxylating malic enzyme; NADP+-malic enzyme; NADP+-specific malic enzyme; NADP+-specific malate dehydrogenase; malate dehydrogenase (NADP+, decarboxylating); L-malate:NADP+ oxidoreductase
EC:1.1.1.82	malate dehydrogenase (NADP+); NADP+-malic enzyme; NADP+-malate dehydrogenase; malic dehydrogenase (nicotinamide adenine dinucleotide phosphate); malate NADP+ dehydrogenase; NADP+ malate dehydrogenase; NADP+-linked malate dehydrogenase; malate dehydrogenase (NADP+)
EC:1.2.1.3	aldehyde dehydrogenase (NAD+); CoA-independent aldehyde dehydrogenase; m-methylbenzaldehyde dehydrogenase; NAD-aldehyde dehydrogenase; NAD-dependent 4-hydroxynonenal dehydrogenase; NAD-dependent aldehyde dehydrogenase; NAD-linked aldehyde dehydrogenase; propionaldehyde dehydrogenase; aldehyde dehydrogenase (NAD)
EC:1.2.1.8	betaine-aldehyde dehydrogenase; betaine aldehyde oxidase; BADH; betaine aldehyde dehydrogenase; BetB
EC:1.2.4.1	pyruvate dehydrogenase (acetyl-transferring); MtPDC (mitochondrial pyruvate dehydrogenase complex); pyruvate decarboxylase; pyruvate dehydrogenase; pyruvate dehydrogenase (lipoamide); pyruvate dehydrogenase complex; pyruvate:lipoamide 2-oxidoreductase (decarboxylating and acceptor-acetylating); pyruvic acid dehydrogenase; pyruvic dehydrogenase
EC:1.8.1.4	dihydrolipoyl dehydrogenase; LDP-Glc; LDP-Val; dehydrolipoate dehydrogenase; diaphorase; dihydrolipoamide dehydrogenase; dihydrolipoamide:NAD+ oxidoreductase; dihydrolipoic dehydrogenase; dihydrothioctic dehydrogenase; lipoamide dehydrogenase (NADH); lipoamide oxidoreductase (NADH); lipoamide reductase; lipoamide reductase (NADH); lipoate dehydrogenase; lipoic acid dehydrogenase; lipoyl dehydroge…
EC:2.3.3.13	2-isopropylmalate synthase; 3-carboxy-3-hydroxy-4-methylpentanoate 3-methyl-2-oxobutanoate-lyase (CoA-acetylating); alpha-isopropylmalate synthetase; alpha-isopropylmalate synthase; alpha-isopropylmalic synthetase; isopropylmalate synthase; isopropylmalate synthetase
EC:2.3.3.9	malate synthase; L-malate glyoxylate-lyase (CoA-acetylating); glyoxylate transacetylase; glyoxylate transacetase; glyoxylic transacetase; malate condensing enzyme; malate synthetase; malic synthetase; malic-condensing enzyme; acetyl-CoA:glyoxylate C-acetyltransferase (thioester-hydrolysing, carboxymethyl-forming)
EC:2.7.1.40	pyruvate kinase; phosphoenolpyruvate kinase; phosphoenol transphosphorylase
EC:2.7.9.1	pyruvate, phosphate dikinase; pyruvate, orthophosphate dikinase; pyruvate-phosphate dikinase (phosphorylating); pyruvate, phosphate dikinase; pyruvate-inorganic phosphate dikinase; pyruvate-phosphate dikinase; pyruvate-phosphate ligase; pyruvic-phosphate dikinase; pyruvic-phosphate ligase; pyruvate, Pi dikinase; PPDK
EC:4.1.1.31	phosphoenolpyruvate carboxylase; phosphopyruvate (phosphate) carboxylase; PEP carboxylase; phosphoenolpyruvic carboxylase; PEPC; PEPCase; phosphate:oxaloacetate carboxy-lyase (phosphorylating)
EC:4.1.1.49	phosphoenolpyruvate carboxykinase (ATP); phosphopyruvate carboxylase (ATP); phosphoenolpyruvate carboxylase (ambiguous); phosphoenolpyruvate carboxykinase (ambiguous); phosphopyruvate carboxykinase (adenosine triphosphate); PEP carboxylase (ambiguous); PEP carboxykinase (ambiguous); PEPCK (ATP); PEPK; PEPCK; phosphoenolpyruvic carboxylase (ambiguous); phosphoenolpyruvic carboxykinase (ambiguous);…
EC:4.4.1.5	lactoylglutathione lyase; methylglyoxalase; aldoketomutase; ketone-aldehyde mutase; glyoxylase I; (R)-S-lactoylglutathione methylglyoxal-lyase (isomerizing)
EC:6.4.1.2	acetyl-CoA carboxylase; acetyl coenzyme A carboxylase
ath00520 Amino sugar and nucleotide sugar metabolism - Arabidopsis thaliana (thale cress) (62)
EC:1.1.1.22	UDP-glucose 6-dehydrogenase; UDP-glucose dehydrogenase; uridine diphosphoglucose dehydrogenase; UDPG dehydrogenase; UDPG:NAD oxidoreductase; UDP-alpha-D-glucose:NAD oxidoreductase; UDP-glucose:NAD+ oxidoreductase; uridine diphosphate glucose dehydrogenase; UDP-D-glucose dehydrogenase; uridine diphosphate D-glucose dehydrogenase
EC:2.7.1.1	hexokinase; hexokinase type IV glucokinase; hexokinase D; hexokinase type IV; hexokinase (phosphorylating); ATP-dependent hexokinase; glucose ATP phosphotransferase
EC:2.7.1.4	fructokinase; fructokinase (phosphorylating); D-fructokinase; D-fructose(D-mannose)kinase
EC:2.7.7.27	glucose-1-phosphate adenylyltransferase; ADP glucose pyrophosphorylase; glucose 1-phosphate adenylyltransferase; adenosine diphosphate glucose pyrophosphorylase; adenosine diphosphoglucose pyrophosphorylase; ADP-glucose pyrophosphorylase; ADP-glucose synthase; ADP-glucose synthetase; ADPG pyrophosphorylase; ADP:alpha-D-glucose-1-phosphate adenylyltransferase
EC:2.7.7.9	UTP---glucose-1-phosphate uridylyltransferase; UDP glucose pyrophosphorylase; glucose-1-phosphate uridylyltransferase; UDPG phosphorylase; UDPG pyrophosphorylase; uridine 5'-diphosphoglucose pyrophosphorylase; uridine diphosphoglucose pyrophosphorylase; uridine diphosphate-D-glucose pyrophosphorylase; uridine-diphosphate glucose pyrophosphorylase
EC:3.13.1.1	UDP-sulfoquinovose synthase; sulfite:UDP-glucose sulfotransferase; UDPsulfoquinovose synthase; UDP-6-sulfo-6-deoxyglucose sulfohydrolase
EC:3.2.1.14	chitinase; ChiC; chitodextrinase (ambiguous); 1,4-beta-poly-N-acetylglucosaminidase; poly-beta-glucosaminidase; beta-1,4-poly-N-acetyl glucosamidinase; poly[1,4-(N-acetyl-beta-D-glucosaminide)] glycanohydrolase
EC:5.1.3.18	GDP-mannose 3,5-epimerase; GDP-D-mannose:GDP-L-galactose epimerase; guanosine 5'-diphosphate D-mannose:guanosine 5'-diphosphate L-galactose epimerase
EC:5.1.3.2	UDP-glucose 4-epimerase; UDP-galactose 4-epimerase; uridine diphosphoglucose epimerase; galactowaldenase; UDPG-4-epimerase; uridine diphosphate galactose 4-epimerase; uridine diphospho-galactose-4-epimerase; UDP-glucose epimerase; 4-epimerase; uridine diphosphoglucose 4-epimerase; uridine diphosphate glucose 4-epimerase; UDP-D-galactose 4-epimerase
EC:5.1.3.5	UDP-arabinose 4-epimerase; uridine diphosphoarabinose epimerase; UDP arabinose epimerase; uridine 5'-diphosphate-D-xylose 4-epimerase; UDP-D-xylose 4-epimerase
EC:5.3.1.9	glucose-6-phosphate isomerase; phosphohexose isomerase; phosphohexomutase; oxoisomerase; hexosephosphate isomerase; phosphosaccharomutase; phosphoglucoisomerase; phosphohexoisomerase; phosphoglucose isomerase; glucose phosphate isomerase; hexose phosphate isomerase; D-glucose-6-phosphate ketol-isomerase
EC:5.4.2.2	phosphoglucomutase (alpha-D-glucose-1,6-bisphosphate-dependent); glucose phosphomutase; phosphoglucose mutase
ath00230 Purine metabolism - Arabidopsis thaliana (thale cress) (57)
EC:2.4.2.14	amidophosphoribosyltransferase; phosphoribosyldiphosphate 5-amidotransferase; glutamine phosphoribosyldiphosphate amidotransferase; alpha-5-phosphoribosyl-1-pyrophosphate amidotransferase; 5'-phosphoribosylpyrophosphate amidotransferase; 5-phosphoribosyl-1-pyrophosphate amidotransferase; 5-phosphororibosyl-1-pyrophosphate amidotransferase; glutamine 5-phosphoribosylpyrophosphate amidotransferase;…
EC:2.4.2.7	adenine phosphoribosyltransferase; AMP pyrophosphorylase; transphosphoribosidase; APRT; AMP-pyrophosphate phosphoribosyltransferase; adenine phosphoribosylpyrophosphate transferase; adenosine phosphoribosyltransferase; adenylate pyrophosphorylase; adenylic pyrophosphorylase
EC:2.7.1.20	adenosine kinase; adenosine kinase (phosphorylating)
EC:2.7.1.40	pyruvate kinase; phosphoenolpyruvate kinase; phosphoenol transphosphorylase
EC:2.7.4.3	adenylate kinase; myokinase; 5'-AMP-kinase; adenylic kinase; adenylokinase
EC:2.7.4.6	nucleoside-diphosphate kinase; nucleoside 5'-diphosphate kinase; nucleoside diphosphate (UDP) kinase; nucleoside diphosphokinase; nucleotide phosphate kinase; UDP kinase; uridine diphosphate kinase
EC:2.7.6.1	ribose-phosphate diphosphokinase; ribose-phosphate pyrophosphokinase; PRPP synthetase; phosphoribosylpyrophosphate synthetase; PPRibP synthetase; PP-ribose P synthetase; 5-phosphoribosyl-1-pyrophosphate synthetase; 5-phosphoribose pyrophosphorylase; 5-phosphoribosyl-alpha-1-pyrophosphate synthetase; phosphoribosyl-diphosphate synthetase; phosphoribosylpyrophosphate synthase; pyrophosphoribosylpho…
EC:2.7.7.6	DNA-directed RNA polymerase; RNA polymerase; RNA nucleotidyltransferase (DNA-directed); RNA polymerase I; RNA polymerase II; RNA polymerase III; C RNA formation factors; deoxyribonucleic acid-dependent ribonucleic acid polymerase; DNA-dependent ribonucleate nucleotidyltransferase; DNA-dependent RNA nucleotidyltransferase; DNA-dependent RNA polymerase; ribonucleate nucleotidyltransferase; ribonucl…
EC:3.5.1.5	urease
EC:5.4.2.2	phosphoglucomutase (alpha-D-glucose-1,6-bisphosphate-dependent); glucose phosphomutase; phosphoglucose mutase
EC:6.3.3.1	phosphoribosylformylglycinamidine cyclo-ligase; phosphoribosylaminoimidazole synthetase; AIR synthetase; 5'-aminoimidazole ribonucleotide synthetase; 2-(formamido)-1-N-(5-phosphoribosyl)acetamidine cyclo-ligase (ADP-forming)
EC:6.3.4.13	phosphoribosylamine---glycine ligase; phosphoribosylglycinamide synthetase; glycinamide ribonucleotide synthetase; phosphoribosylglycineamide synthetase; glycineamide ribonucleotide synthetase; 2-amino-N-ribosylacetamide 5'-phosphate kinosynthase; 5'-phosphoribosylglycinamide synthetase; GAR
EC:6.3.4.4	adenylosuccinate synthase; IMP---aspartate ligase; adenylosuccinate synthetase; succinoadenylic kinosynthetase; succino-AMP synthetase
ath00630 Glyoxylate and dicarboxylate metabolism - Arabidopsis thaliana (thale cress) (57)
EC:1.1.1.37	malate dehydrogenase; malic dehydrogenase; L-malate dehydrogenase; NAD-L-malate dehydrogenase; malic acid dehydrogenase; NAD-dependent malic dehydrogenase; NAD-malate dehydrogenase; NAD-malic dehydrogenase; malate (NAD) dehydrogenase; NAD-dependent malate dehydrogenase; NAD-specific malate dehydrogenase; NAD-linked malate dehydrogenase; MDH; L-malate-NAD+ oxidoreductase
EC:1.1.3.15	(S)-2-hydroxy-acid oxidase; hydroxy-acid oxidase A; hydroxy-acid oxidase B; glycolate oxidase; L-2-hydroxy acid oxidase; hydroxyacid oxidase A; L-alpha-hydroxy acid oxidase
EC:1.11.1.6	catalase; equilase; caperase; optidase; catalase-peroxidase; CAT
EC:1.2.1.2	formate dehydrogenase; formate-NAD+ oxidoreductase; FDH I; FDH II; N-FDH; formic hydrogen-lyase; formate hydrogenlyase; hydrogenlyase; NAD+-linked formate dehydrogenase; NAD+-dependent formate dehydrogenase; formate dehydrogenase (NAD+); NAD+-formate dehydrogenase; formate benzyl-viologen oxidoreductase; formic acid dehydrogenase
EC:1.4.4.2	glycine dehydrogenase (aminomethyl-transferring); P-protein; glycine decarboxylase; glycine-cleavage complex; glycine:lipoylprotein oxidoreductase (decarboxylating and acceptor-aminomethylating); protein P1; glycine dehydrogenase (decarboxylating); glycine cleavage system P-protein; glycine-cleavage complex P-protein
EC:1.4.7.1	glutamate synthase (ferredoxin); ferredoxin-dependent glutamate synthase; ferredoxin-glutamate synthase; glutamate synthase (ferredoxin-dependent)
EC:1.8.1.4	dihydrolipoyl dehydrogenase; LDP-Glc; LDP-Val; dehydrolipoate dehydrogenase; diaphorase; dihydrolipoamide dehydrogenase; dihydrolipoamide:NAD+ oxidoreductase; dihydrolipoic dehydrogenase; dihydrothioctic dehydrogenase; lipoamide dehydrogenase (NADH); lipoamide oxidoreductase (NADH); lipoamide reductase; lipoamide reductase (NADH); lipoate dehydrogenase; lipoic acid dehydrogenase; lipoyl dehydroge…
EC:2.1.2.1	glycine hydroxymethyltransferase; serine aldolase; threonine aldolase; serine hydroxymethylase; serine hydroxymethyltransferase; allothreonine aldolase; L-serine hydroxymethyltransferase; L-threonine aldolase; serine hydroxymethyltransferase; serine transhydroxymethylase
EC:2.1.2.10	aminomethyltransferase; S-aminomethyldihydrolipoylprotein:(6S)-tetrahydrofolate aminomethyltransferase (ammonia-forming); T-protein; glycine synthase; tetrahydrofolate aminomethyltransferase; [protein]-8-S-aminomethyldihydrolipoyllysine:tetrahydrofolate aminomethyltransferase (ammonia-forming)
EC:2.3.3.1	citrate (Si)-synthase; (R)-citric synthase; citrate oxaloacetate-lyase [(pro-3S)-CH2COO-->acetyl-CoA]
EC:2.3.3.9	malate synthase; L-malate glyoxylate-lyase (CoA-acetylating); glyoxylate transacetylase; glyoxylate transacetase; glyoxylic transacetase; malate condensing enzyme; malate synthetase; malic synthetase; malic-condensing enzyme; acetyl-CoA:glyoxylate C-acetyltransferase (thioester-hydrolysing, carboxymethyl-forming)
EC:2.6.1.2	alanine transaminase; glutamic-pyruvic transaminase; glutamic-alanine transaminase; GPT (ambiguous); beta-alanine aminotransferase; alanine aminotransferase; alanine-alpha-ketoglutarate aminotransferase; alanine-pyruvate aminotransferase; ALT; glutamic acid-pyruvic acid transaminase; glutamic-pyruvic aminotransferase; L-alanine aminotransferase; L-alanine transaminase; L-alanine-alpha-ketoglutara…
EC:4.1.1.39	ribulose-bisphosphate carboxylase; D-ribulose 1,5-diphosphate carboxylase; D-ribulose-1,5-bisphosphate carboxylase; RuBP carboxylase; carboxydismutase; diphosphoribulose carboxylase; ribulose 1,5-bisphosphate carboxylase; ribulose 1,5-bisphosphate carboxylase/oxygenase; ribulose 1,5-diphosphate carboxylase; ribulose 1,5-diphosphate carboxylase/oxygenase; ribulose bisphosphate carboxylase/oxygenas…
EC:4.1.3.1	isocitrate lyase; isocitrase; isocitritase; isocitratase; threo-Ds-isocitrate glyoxylate-lyase; isocitrate glyoxylate-lyase
EC:4.2.1.3	aconitate hydratase; cis-aconitase; aconitase; AcnB; 2-methylaconitate hydratase; citrate(isocitrate) hydro-lyase
EC:6.3.1.2	glutamine synthetase; glutamate---ammonia ligase; glutamylhydroxamic synthetase; L-glutamine synthetase; GS
ath00460 Cyanoamino acid metabolism - Arabidopsis thaliana (thale cress) (52)
EC:2.1.2.1	glycine hydroxymethyltransferase; serine aldolase; threonine aldolase; serine hydroxymethylase; serine hydroxymethyltransferase; allothreonine aldolase; L-serine hydroxymethyltransferase; L-threonine aldolase; serine hydroxymethyltransferase; serine transhydroxymethylase
EC:2.5.1.47	cysteine synthase; O-acetyl-L-serine sulfhydrylase; O-acetyl-L-serine sulfohydrolase; O-acetylserine (thiol)-lyase; O-acetylserine (thiol)-lyase A; O-acetylserine sulfhydrylase; O3-acetyl-L-serine acetate-lyase (adding hydrogen-sulfide); acetylserine sulfhydrylase; cysteine synthetase; S-sulfocysteine synthase; 3-O-acetyl-L-serine:hydrogen-sulfide 2-amino-2-carboxyethyltransferase; O3-acetyl-L-se…
EC:3.2.1.21	beta-glucosidase; gentiobiase; cellobiase; emulsin; elaterase; aryl-beta-glucosidase; beta-D-glucosidase; beta-glucoside glucohydrolase; arbutinase; amygdalinase; p-nitrophenyl beta-glucosidase; primeverosidase; amygdalase; linamarase; salicilinase; beta-1,6-glucosidase
EC:3.5.5.1	nitrilase; acetonitrilase; benzonitrilase
EC:3.5.1.1	asparaginase
ath00190 Oxidative phosphorylation - Arabidopsis thaliana (thale cress) (51)
EC:1.10.2.2	quinol---cytochrome-c reductase; ubiquinol---cytochrome-c reductase; coenzyme Q-cytochrome c reductase; dihydrocoenzyme Q-cytochrome c reductase; reduced ubiquinone-cytochrome c reductase; complex III (mitochondrial electron transport); ubiquinone-cytochrome c reductase; ubiquinol-cytochrome c oxidoreductase; reduced coenzyme Q-cytochrome c reductase; ubiquinone-cytochrome c oxidoreductase; reduc…
EC:1.3.5.1	succinate dehydrogenase; succinate dehydrogenase (quinone); succinate dehydrogenase (ubiquinone); succinic dehydrogenase; complex II (ambiguous); succinate dehydrogenase complex; SDH; succinate:ubiquinone oxidoreductase
EC:1.6.5.3	NADH:ubiquinone reductase (H+-translocating); ubiquinone reductase (ambiguous); type 1 dehydrogenase; complex 1 dehydrogenase; coenzyme Q reductase (ambiguous); complex I (electron transport chain); complex I (mitochondrial electron transport); complex I (NADH:Q1 oxidoreductase); dihydronicotinamide adenine dinucleotide-coenzyme Q reductase (ambiguous); DPNH-coenzyme Q reductase (ambiguous); DPNH…
EC:3.6.1.1	inorganic diphosphatase
EC:3.6.3.14	H+-transporting two-sector ATPase; ATP synthase; F1-ATPase; FoF1-ATPase; H+-transporting ATPase; mitochondrial ATPase; coupling factors (F0, F1 and CF1); chloroplast ATPase; bacterial Ca2+/Mg2+ ATPase
ath04626 Plant-pathogen interaction - Arabidopsis thaliana (thale cress) (47)
EC:2.7.11.1	non-specific serine/threonine protein kinase; A-kinase; AP50 kinase; ATP-protein transphosphorylase; calcium-dependent protein kinase C; calcium/phospholipid-dependent protein kinase; cAMP-dependent protein kinase; cAMP-dependent protein kinase A; casein kinase; casein kinase (phosphorylating); casein kinase 2; casein kinase I; casein kinase II; cGMP-dependent protein kinase; CK-2; CKI; CKII; cyc…
EC:2.7.11.24	mitogen-activated protein kinase; c-Jun N-terminal kinase; Dp38; ERK; ERK1; ERK2; extracellular signal-regulated kinase; JNK; JNK3alpha1; LeMPK3; MAP kinase; MAP-2 kinase; MAPK; MBP kinase I; MBP kinase II; microtubule-associated protein 2 kinase; microtubule-associated protein kinase; myelin basic protein kinase; p38delta; p38-2; p42 mitogen-activated protein kinase; p42mapk; PMK-1; PMK-2; PMK-3…
ath04016 MAPK signaling pathway - plant - Arabidopsis thaliana (thale cress) (44)
EC:1.11.1.6	catalase; equilase; caperase; optidase; catalase-peroxidase; CAT
EC:2.7.11.1	non-specific serine/threonine protein kinase; A-kinase; AP50 kinase; ATP-protein transphosphorylase; calcium-dependent protein kinase C; calcium/phospholipid-dependent protein kinase; cAMP-dependent protein kinase; cAMP-dependent protein kinase A; casein kinase; casein kinase (phosphorylating); casein kinase 2; casein kinase I; casein kinase II; cGMP-dependent protein kinase; CK-2; CKI; CKII; cyc…
EC:2.7.11.24	mitogen-activated protein kinase; c-Jun N-terminal kinase; Dp38; ERK; ERK1; ERK2; extracellular signal-regulated kinase; JNK; JNK3alpha1; LeMPK3; MAP kinase; MAP-2 kinase; MAPK; MBP kinase I; MBP kinase II; microtubule-associated protein 2 kinase; microtubule-associated protein kinase; myelin basic protein kinase; p38delta; p38-2; p42 mitogen-activated protein kinase; p42mapk; PMK-1; PMK-2; PMK-3…
EC:2.7.4.6	nucleoside-diphosphate kinase; nucleoside 5'-diphosphate kinase; nucleoside diphosphate (UDP) kinase; nucleoside diphosphokinase; nucleotide phosphate kinase; UDP kinase; uridine diphosphate kinase
EC:3.1.3.16	protein-serine/threonine phosphatase; phosphoprotein phosphatase (ambiguous); protein phosphatase-1; protein phosphatase-2A; protein phosphatase-2B; protein phosphatase-2C; protein D phosphatase; phosphospectrin phosphatase; casein phosphatase; Aspergillus awamori acid protein phosphatase; calcineurin; phosphatase 2A; phosphatase 2B; phosphatase II; phosphatase IB; phosphatase C-II; polycation mo…
EC:3.2.1.14	chitinase; ChiC; chitodextrinase (ambiguous); 1,4-beta-poly-N-acetylglucosaminidase; poly-beta-glucosaminidase; beta-1,4-poly-N-acetyl glucosamidinase; poly[1,4-(N-acetyl-beta-D-glucosaminide)] glycanohydrolase
ath00270 Cysteine and methionine metabolism - Arabidopsis thaliana (thale cress) (42)
EC:1.1.1.27	L-lactate dehydrogenase; lactic acid dehydrogenase; L(+)-nLDH; L-(+)-lactate dehydrogenase; L-lactic dehydrogenase; L-lactic acid dehydrogenase; lactate dehydrogenase; lactate dehydrogenase NAD+-dependent; lactic dehydrogenase; NAD+-lactate dehydrogenase
EC:1.1.1.37	malate dehydrogenase; malic dehydrogenase; L-malate dehydrogenase; NAD-L-malate dehydrogenase; malic acid dehydrogenase; NAD-dependent malic dehydrogenase; NAD-malate dehydrogenase; NAD-malic dehydrogenase; malate (NAD) dehydrogenase; NAD-dependent malate dehydrogenase; NAD-specific malate dehydrogenase; NAD-linked malate dehydrogenase; MDH; L-malate-NAD+ oxidoreductase
EC:1.14.17.4	aminocyclopropanecarboxylate oxidase; ACC oxidase; ethylene-forming enzyme
EC:2.1.1.14	5-methyltetrahydropteroyltriglutamate---homocysteine S-methyltransferase; tetrahydropteroyltriglutamate methyltransferase; homocysteine methylase; methyltransferase, tetrahydropteroylglutamate-homocysteine transmethylase; methyltetrahydropteroylpolyglutamate:homocysteine methyltransferase; cobalamin-independent methionine synthase; methionine synthase (cobalamin-independent); MetE
EC:2.5.1.16	spermidine synthase; aminopropyltransferase; putrescine aminopropyltransferase; spermidine synthetase; SpeE; S-adenosylmethioninamine:putrescine 3-aminopropyltransferase
EC:2.5.1.47	cysteine synthase; O-acetyl-L-serine sulfhydrylase; O-acetyl-L-serine sulfohydrolase; O-acetylserine (thiol)-lyase; O-acetylserine (thiol)-lyase A; O-acetylserine sulfhydrylase; O3-acetyl-L-serine acetate-lyase (adding hydrogen-sulfide); acetylserine sulfhydrylase; cysteine synthetase; S-sulfocysteine synthase; 3-O-acetyl-L-serine:hydrogen-sulfide 2-amino-2-carboxyethyltransferase; O3-acetyl-L-se…
EC:2.5.1.6	methionine adenosyltransferase; adenosylmethionine synthetase; ATP-methionine adenosyltransferase; methionine S-adenosyltransferase; methionine-activating enzyme; S-adenosyl-L-methionine synthetase; S-adenosylmethionine synthase; S-adenosylmethionine synthetase; AdoMet synthetase
EC:2.6.1.1	aspartate transaminase; glutamic-oxaloacetic transaminase; glutamic-aspartic transaminase; transaminase A; AAT; AspT; 2-oxoglutarate-glutamate aminotransferase; aspartate alpha-ketoglutarate transaminase; aspartate aminotransferase; aspartate-2-oxoglutarate transaminase; aspartic acid aminotransferase; aspartic aminotransferase; aspartyl aminotransferase; AST; glutamate-oxalacetate aminotransfera…
EC:3.3.1.1	adenosylhomocysteinase; S-adenosylhomocysteine synthase; S-adenosylhomocysteine hydrolase (ambiguous); adenosylhomocysteine hydrolase; S-adenosylhomocysteinase; SAHase; AdoHcyase
EC:6.3.2.2	glutamate---cysteine ligase; gamma-glutamylcysteine synthetase; gamma-glutamyl-L-cysteine synthetase; gamma-glutamylcysteinyl synthetase
ath00040 Pentose and glucuronate interconversions - Arabidopsis thaliana (thale cress) (40)
EC:1.1.1.22	UDP-glucose 6-dehydrogenase; UDP-glucose dehydrogenase; uridine diphosphoglucose dehydrogenase; UDPG dehydrogenase; UDPG:NAD oxidoreductase; UDP-alpha-D-glucose:NAD oxidoreductase; UDP-glucose:NAD+ oxidoreductase; uridine diphosphate glucose dehydrogenase; UDP-D-glucose dehydrogenase; uridine diphosphate D-glucose dehydrogenase
EC:2.7.7.9	UTP---glucose-1-phosphate uridylyltransferase; UDP glucose pyrophosphorylase; glucose-1-phosphate uridylyltransferase; UDPG phosphorylase; UDPG pyrophosphorylase; uridine 5'-diphosphoglucose pyrophosphorylase; uridine diphosphoglucose pyrophosphorylase; uridine diphosphate-D-glucose pyrophosphorylase; uridine-diphosphate glucose pyrophosphorylase
EC:3.1.1.11	pectinesterase; pectin demethoxylase; pectin methoxylase; pectin methylesterase; pectase; pectin methyl esterase; pectinoesterase
EC:3.2.1.67	galacturan 1,4-alpha-galacturonidase; exopolygalacturonase; poly(galacturonate) hydrolase; exo-D-galacturonase; exo-D-galacturonanase; exopoly-D-galacturonase; poly(1,4-alpha-D-galacturonide) galacturonohydrolase
EC:5.1.3.1	ribulose-phosphate 3-epimerase; phosphoribulose epimerase; erythrose-4-phosphate isomerase; phosphoketopentose 3-epimerase; xylulose phosphate 3-epimerase; phosphoketopentose epimerase; ribulose 5-phosphate 3-epimerase; D-ribulose phosphate-3-epimerase; D-ribulose 5-phosphate epimerase; D-ribulose-5-P 3-epimerase; D-xylulose-5-phosphate 3-epimerase; pentose-5-phosphate 3-epimerase
EC:5.3.1.5	xylose isomerase; D-xylose isomerase; D-xylose ketoisomerase; D-xylose ketol-isomerase
EC:1.1.1.21	aldehyde reductase
ath00020 Citrate cycle (TCA cycle) - Arabidopsis thaliana (thale cress) (39)
EC:1.1.1.37	malate dehydrogenase; malic dehydrogenase; L-malate dehydrogenase; NAD-L-malate dehydrogenase; malic acid dehydrogenase; NAD-dependent malic dehydrogenase; NAD-malate dehydrogenase; NAD-malic dehydrogenase; malate (NAD) dehydrogenase; NAD-dependent malate dehydrogenase; NAD-specific malate dehydrogenase; NAD-linked malate dehydrogenase; MDH; L-malate-NAD+ oxidoreductase
EC:1.1.1.42	isocitrate dehydrogenase (NADP+); oxalosuccinate decarboxylase; oxalsuccinic decarboxylase; isocitrate (NADP) dehydrogenase; isocitrate (nicotinamide adenine dinucleotide phosphate) dehydrogenase; NADP-specific isocitrate dehydrogenase; NADP-linked isocitrate dehydrogenase; NADP-dependent isocitrate dehydrogenase; NADP isocitric dehydrogenase; isocitrate dehydrogenase (NADP-dependent); NADP-depen…
EC:1.2.4.1	pyruvate dehydrogenase (acetyl-transferring); MtPDC (mitochondrial pyruvate dehydrogenase complex); pyruvate decarboxylase; pyruvate dehydrogenase; pyruvate dehydrogenase (lipoamide); pyruvate dehydrogenase complex; pyruvate:lipoamide 2-oxidoreductase (decarboxylating and acceptor-acetylating); pyruvic acid dehydrogenase; pyruvic dehydrogenase
EC:1.3.5.1	succinate dehydrogenase; succinate dehydrogenase (quinone); succinate dehydrogenase (ubiquinone); succinic dehydrogenase; complex II (ambiguous); succinate dehydrogenase complex; SDH; succinate:ubiquinone oxidoreductase
EC:1.8.1.4	dihydrolipoyl dehydrogenase; LDP-Glc; LDP-Val; dehydrolipoate dehydrogenase; diaphorase; dihydrolipoamide dehydrogenase; dihydrolipoamide:NAD+ oxidoreductase; dihydrolipoic dehydrogenase; dihydrothioctic dehydrogenase; lipoamide dehydrogenase (NADH); lipoamide oxidoreductase (NADH); lipoamide reductase; lipoamide reductase (NADH); lipoate dehydrogenase; lipoic acid dehydrogenase; lipoyl dehydroge…
EC:2.3.3.1	citrate (Si)-synthase; (R)-citric synthase; citrate oxaloacetate-lyase [(pro-3S)-CH2COO-->acetyl-CoA]
EC:4.1.1.49	phosphoenolpyruvate carboxykinase (ATP); phosphopyruvate carboxylase (ATP); phosphoenolpyruvate carboxylase (ambiguous); phosphoenolpyruvate carboxykinase (ambiguous); phosphopyruvate carboxykinase (adenosine triphosphate); PEP carboxylase (ambiguous); PEP carboxykinase (ambiguous); PEPCK (ATP); PEPK; PEPCK; phosphoenolpyruvic carboxylase (ambiguous); phosphoenolpyruvic carboxykinase (ambiguous);…
EC:4.2.1.3	aconitate hydratase; cis-aconitase; aconitase; AcnB; 2-methylaconitate hydratase; citrate(isocitrate) hydro-lyase
EC:6.2.1.4	succinate---CoA ligase (GDP-forming); succinyl-CoA synthetase (GDP-forming); succinyl coenzyme A synthetase (guanosine diphosphate-forming); succinate thiokinase; succinic thiokinase; succinyl coenzyme A synthetase; succinate-phosphorylating enzyme; P-enzyme; SCS; G-STK; succinyl coenzyme A synthetase (GDP-forming); succinyl CoA synthetase; succinyl coenzyme A synthetase
ath00030 Pentose phosphate pathway - Arabidopsis thaliana (thale cress) (35)
EC:1.1.1.49	glucose-6-phosphate dehydrogenase (NADP+); NADP-glucose-6-phosphate dehydrogenase; Zwischenferment; D-glucose 6-phosphate dehydrogenase; glucose 6-phosphate dehydrogenase (NADP); NADP-dependent glucose 6-phosphate dehydrogenase; 6-phosphoglucose dehydrogenase; Entner-Doudoroff enzyme; glucose-6-phosphate 1-dehydrogenase; G6PDH; GPD; glucose-6-phosphate dehydrogenase
EC:1.2.1.9	glyceraldehyde-3-phosphate dehydrogenase (NADP+); triosephosphate dehydrogenase; dehydrogenase, glyceraldehyde phosphate (nicotinamide adenine dinucleotide phosphate); glyceraldehyde phosphate dehydrogenase (NADP+); glyceraldehyde 3-phosphate dehydrogenase (NADP+); NADP+-glyceraldehyde phosphate dehydrogenase; NADP+-glyceraldehyde-3-phosphate dehydrogenase; glyceraldehyde-3-phosphate:NADP+ reduct…
EC:2.2.1.1	transketolase; glycolaldehydetransferase
EC:2.7.1.90	diphosphate---fructose-6-phosphate 1-phosphotransferase; 6-phosphofructokinase (pyrophosphate); pyrophosphate-fructose 6-phosphate 1-phosphotransferase; inorganic pyrophosphate-dependent phosphofructokinase; inorganic pyrophosphate-phosphofructokinase; pyrophosphate-dependent phosphofructo-1-kinase; pyrophosphate-fructose 6-phosphate phosphotransferase
EC:2.7.6.1	ribose-phosphate diphosphokinase; ribose-phosphate pyrophosphokinase; PRPP synthetase; phosphoribosylpyrophosphate synthetase; PPRibP synthetase; PP-ribose P synthetase; 5-phosphoribosyl-1-pyrophosphate synthetase; 5-phosphoribose pyrophosphorylase; 5-phosphoribosyl-alpha-1-pyrophosphate synthetase; phosphoribosyl-diphosphate synthetase; phosphoribosylpyrophosphate synthase; pyrophosphoribosylpho…
EC:3.1.3.11	fructose-bisphosphatase; hexose diphosphatase; FBPase; fructose 1,6-diphosphatase; fructose 1,6-diphosphate phosphatase; D-fructose 1,6-diphosphatase; fructose 1,6-bisphosphatase; fructose diphosphatase; fructose diphosphate phosphatase; fructose bisphosphate phosphatase; fructose 1,6-bisphosphate 1-phosphatase; fructose 1,6-bisphosphate phosphatase; hexose bisphosphatase; D-fructose-1,6-bisphosp…
EC:4.1.2.13	fructose-bisphosphate aldolase; aldolase; fructose-1,6-bisphosphate triosephosphate-lyase; fructose diphosphate aldolase; diphosphofructose aldolase; fructose 1,6-diphosphate aldolase; ketose 1-phosphate aldolase; phosphofructoaldolase; zymohexase; fructoaldolase; fructose 1-phosphate aldolase; fructose 1-monophosphate aldolase; 1,6-diphosphofructose aldolase; SMALDO; D-fructose-1,6-bisphosphate …
EC:5.1.3.1	ribulose-phosphate 3-epimerase; phosphoribulose epimerase; erythrose-4-phosphate isomerase; phosphoketopentose 3-epimerase; xylulose phosphate 3-epimerase; phosphoketopentose epimerase; ribulose 5-phosphate 3-epimerase; D-ribulose phosphate-3-epimerase; D-ribulose 5-phosphate epimerase; D-ribulose-5-P 3-epimerase; D-xylulose-5-phosphate 3-epimerase; pentose-5-phosphate 3-epimerase
EC:5.3.1.9	glucose-6-phosphate isomerase; phosphohexose isomerase; phosphohexomutase; oxoisomerase; hexosephosphate isomerase; phosphosaccharomutase; phosphoglucoisomerase; phosphohexoisomerase; phosphoglucose isomerase; glucose phosphate isomerase; hexose phosphate isomerase; D-glucose-6-phosphate ketol-isomerase
EC:5.4.2.2	phosphoglucomutase (alpha-D-glucose-1,6-bisphosphate-dependent); glucose phosphomutase; phosphoglucose mutase
ath00053 Ascorbate and aldarate metabolism - Arabidopsis thaliana (thale cress) (35)
EC:1.1.1.22	UDP-glucose 6-dehydrogenase; UDP-glucose dehydrogenase; uridine diphosphoglucose dehydrogenase; UDPG dehydrogenase; UDPG:NAD oxidoreductase; UDP-alpha-D-glucose:NAD oxidoreductase; UDP-glucose:NAD+ oxidoreductase; uridine diphosphate glucose dehydrogenase; UDP-D-glucose dehydrogenase; uridine diphosphate D-glucose dehydrogenase
EC:1.10.3.3	L-ascorbate oxidase; ascorbase; ascorbic acid oxidase; ascorbate oxidase; ascorbic oxidase; ascorbate dehydrogenase; L-ascorbic acid oxidase; AAO; L-ascorbate:O2 oxidoreductase; AA oxidase
EC:1.11.1.11	L-ascorbate peroxidase; L-ascorbic acid peroxidase; L-ascorbic acid-specific peroxidase; ascorbate peroxidase; ascorbic acid peroxidase
EC:1.2.1.3	aldehyde dehydrogenase (NAD+); CoA-independent aldehyde dehydrogenase; m-methylbenzaldehyde dehydrogenase; NAD-aldehyde dehydrogenase; NAD-dependent 4-hydroxynonenal dehydrogenase; NAD-dependent aldehyde dehydrogenase; NAD-linked aldehyde dehydrogenase; propionaldehyde dehydrogenase; aldehyde dehydrogenase (NAD)
EC:1.2.1.8	betaine-aldehyde dehydrogenase; betaine aldehyde oxidase; BADH; betaine aldehyde dehydrogenase; BetB
EC:1.6.5.4	monodehydroascorbate reductase (NADH); NADH:semidehydroascorbic acid oxidoreductase; MDHA; semidehydroascorbate reductase; AFR; AFR-reductase; ascorbic free radical reductase; ascorbate free radical reductase; SOR; MDAsA reductase (NADPH) ; SDA reductase; NADH:ascorbate radical oxidoreductase; NADH-semidehydroascorbate oxidoreductase; ascorbate free-radical reductase ; NADH:AFR oxidoreductase; mo…
EC:2.5.1.18	glutathione transferase; glutathione S-transferase; glutathione S-alkyltransferase; glutathione S-aryltransferase; S-(hydroxyalkyl)glutathione lyase; glutathione S-aralkyltransferase; glutathione S-alkyl transferase; GST
EC:3.1.3.25	inositol-phosphate phosphatase; myo-inositol-1(or 4)-monophosphatase; inositol 1-phosphatase; L-myo-inositol-1-phosphate phosphatase; myo-inositol 1-phosphatase; inositol phosphatase; inositol monophosphate phosphatase; inositol-1(or 4)-monophosphatase; myo-inositol-1(or 4)-phosphate phosphohydrolase; myo-inositol monophosphatase; myo-inositol-1-phosphatase
EC:5.1.3.18	GDP-mannose 3,5-epimerase; GDP-D-mannose:GDP-L-galactose epimerase; guanosine 5'-diphosphate D-mannose:guanosine 5'-diphosphate L-galactose epimerase
ath04075 Plant hormone signal transduction - Arabidopsis thaliana (thale cress) (34)
EC:2.7.11.1	non-specific serine/threonine protein kinase; A-kinase; AP50 kinase; ATP-protein transphosphorylase; calcium-dependent protein kinase C; calcium/phospholipid-dependent protein kinase; cAMP-dependent protein kinase; cAMP-dependent protein kinase A; casein kinase; casein kinase (phosphorylating); casein kinase 2; casein kinase I; casein kinase II; cGMP-dependent protein kinase; CK-2; CKI; CKII; cyc…
EC:2.7.11.24	mitogen-activated protein kinase; c-Jun N-terminal kinase; Dp38; ERK; ERK1; ERK2; extracellular signal-regulated kinase; JNK; JNK3alpha1; LeMPK3; MAP kinase; MAP-2 kinase; MAPK; MBP kinase I; MBP kinase II; microtubule-associated protein 2 kinase; microtubule-associated protein kinase; myelin basic protein kinase; p38delta; p38-2; p42 mitogen-activated protein kinase; p42mapk; PMK-1; PMK-2; PMK-3…
EC:3.1.3.16	protein-serine/threonine phosphatase; phosphoprotein phosphatase (ambiguous); protein phosphatase-1; protein phosphatase-2A; protein phosphatase-2B; protein phosphatase-2C; protein D phosphatase; phosphospectrin phosphatase; casein phosphatase; Aspergillus awamori acid protein phosphatase; calcineurin; phosphatase 2A; phosphatase 2B; phosphatase II; phosphatase IB; phosphatase C-II; polycation mo…
ath00051 Fructose and mannose metabolism - Arabidopsis thaliana (thale cress) (32)
EC:2.7.1.1	hexokinase; hexokinase type IV glucokinase; hexokinase D; hexokinase type IV; hexokinase (phosphorylating); ATP-dependent hexokinase; glucose ATP phosphotransferase
EC:2.7.1.4	fructokinase; fructokinase (phosphorylating); D-fructokinase; D-fructose(D-mannose)kinase
EC:2.7.1.90	diphosphate---fructose-6-phosphate 1-phosphotransferase; 6-phosphofructokinase (pyrophosphate); pyrophosphate-fructose 6-phosphate 1-phosphotransferase; inorganic pyrophosphate-dependent phosphofructokinase; inorganic pyrophosphate-phosphofructokinase; pyrophosphate-dependent phosphofructo-1-kinase; pyrophosphate-fructose 6-phosphate phosphotransferase
EC:3.1.3.11	fructose-bisphosphatase; hexose diphosphatase; FBPase; fructose 1,6-diphosphatase; fructose 1,6-diphosphate phosphatase; D-fructose 1,6-diphosphatase; fructose 1,6-bisphosphatase; fructose diphosphatase; fructose diphosphate phosphatase; fructose bisphosphate phosphatase; fructose 1,6-bisphosphate 1-phosphatase; fructose 1,6-bisphosphate phosphatase; hexose bisphosphatase; D-fructose-1,6-bisphosp…
EC:4.1.2.13	fructose-bisphosphate aldolase; aldolase; fructose-1,6-bisphosphate triosephosphate-lyase; fructose diphosphate aldolase; diphosphofructose aldolase; fructose 1,6-diphosphate aldolase; ketose 1-phosphate aldolase; phosphofructoaldolase; zymohexase; fructoaldolase; fructose 1-phosphate aldolase; fructose 1-monophosphate aldolase; 1,6-diphosphofructose aldolase; SMALDO; D-fructose-1,6-bisphosphate …
EC:5.3.1.1	triose-phosphate isomerase; phosphotriose isomerase; triose phosphoisomerase; triose phosphate mutase; D-glyceraldehyde-3-phosphate ketol-isomerase
EC:5.3.1.5	xylose isomerase; D-xylose isomerase; D-xylose ketoisomerase; D-xylose ketol-isomerase
EC:1.1.1.21	aldehyde reductase
ath01210 2-Oxocarboxylic acid metabolism - Arabidopsis thaliana (thale cress) (31)
EC:1.1.1.42	isocitrate dehydrogenase (NADP+); oxalosuccinate decarboxylase; oxalsuccinic decarboxylase; isocitrate (NADP) dehydrogenase; isocitrate (nicotinamide adenine dinucleotide phosphate) dehydrogenase; NADP-specific isocitrate dehydrogenase; NADP-linked isocitrate dehydrogenase; NADP-dependent isocitrate dehydrogenase; NADP isocitric dehydrogenase; isocitrate dehydrogenase (NADP-dependent); NADP-depen…
EC:1.1.1.85	3-isopropylmalate dehydrogenase; beta-isopropylmalic enzyme; beta-isopropylmalate dehydrogenase; threo-Ds-3-isopropylmalate dehydrogenase; 3-carboxy-2-hydroxy-4-methylpentanoate:NAD+ oxidoreductase
EC:1.1.1.86	ketol-acid reductoisomerase (NADP+); dihydroxyisovalerate dehydrogenase (isomerizing); acetohydroxy acid isomeroreductase; ketol acid reductoisomerase; alpha-keto-beta-hydroxylacyl reductoisomerase; 2-hydroxy-3-keto acid reductoisomerase; acetohydroxy acid reductoisomerase; acetolactate reductoisomerase; dihydroxyisovalerate (isomerizing) dehydrogenase; isomeroreductase; reductoisomerase; ketol-a…
EC:1.2.1.38	N-acetyl-gamma-glutamyl-phosphate reductase; reductase, acetyl-gamma-glutamyl phosphate; N-acetylglutamate 5-semialdehyde dehydrogenase; N-acetylglutamic gamma-semialdehyde dehydrogenase; N-acetyl-L-glutamate gamma-semialdehyde:NADP+ oxidoreductase (phosphorylating)
EC:2.2.1.6	acetolactate synthase; alpha-acetohydroxy acid synthetase; alpha-acetohydroxyacid synthase; alpha-acetolactate synthase; alpha-acetolactate synthetase; acetohydroxy acid synthetase; acetohydroxyacid synthase; acetolactate pyruvate-lyase (carboxylating); acetolactic synthetase
EC:2.3.3.1	citrate (Si)-synthase; (R)-citric synthase; citrate oxaloacetate-lyase [(pro-3S)-CH2COO-->acetyl-CoA]
EC:2.3.3.13	2-isopropylmalate synthase; 3-carboxy-3-hydroxy-4-methylpentanoate 3-methyl-2-oxobutanoate-lyase (CoA-acetylating); alpha-isopropylmalate synthetase; alpha-isopropylmalate synthase; alpha-isopropylmalic synthetase; isopropylmalate synthase; isopropylmalate synthetase
EC:2.6.1.1	aspartate transaminase; glutamic-oxaloacetic transaminase; glutamic-aspartic transaminase; transaminase A; AAT; AspT; 2-oxoglutarate-glutamate aminotransferase; aspartate alpha-ketoglutarate transaminase; aspartate aminotransferase; aspartate-2-oxoglutarate transaminase; aspartic acid aminotransferase; aspartic aminotransferase; aspartyl aminotransferase; AST; glutamate-oxalacetate aminotransfera…
EC:2.6.1.2	alanine transaminase; glutamic-pyruvic transaminase; glutamic-alanine transaminase; GPT (ambiguous); beta-alanine aminotransferase; alanine aminotransferase; alanine-alpha-ketoglutarate aminotransferase; alanine-pyruvate aminotransferase; ALT; glutamic acid-pyruvic acid transaminase; glutamic-pyruvic aminotransferase; L-alanine aminotransferase; L-alanine transaminase; L-alanine-alpha-ketoglutara…
EC:4.2.1.3	aconitate hydratase; cis-aconitase; aconitase; AcnB; 2-methylaconitate hydratase; citrate(isocitrate) hydro-lyase
ath00052 Galactose metabolism - Arabidopsis thaliana (thale cress) (30)
EC:2.7.1.1	hexokinase; hexokinase type IV glucokinase; hexokinase D; hexokinase type IV; hexokinase (phosphorylating); ATP-dependent hexokinase; glucose ATP phosphotransferase
EC:2.7.7.9	UTP---glucose-1-phosphate uridylyltransferase; UDP glucose pyrophosphorylase; glucose-1-phosphate uridylyltransferase; UDPG phosphorylase; UDPG pyrophosphorylase; uridine 5'-diphosphoglucose pyrophosphorylase; uridine diphosphoglucose pyrophosphorylase; uridine diphosphate-D-glucose pyrophosphorylase; uridine-diphosphate glucose pyrophosphorylase
EC:3.2.1.20	alpha-glucosidase; maltase; glucoinvertase; glucosidosucrase; maltase-glucoamylase; alpha-glucopyranosidase; glucosidoinvertase; alpha-D-glucosidase; alpha-glucoside hydrolase; alpha-1,4-glucosidase
EC:3.2.1.22	alpha-galactosidase; melibiase; alpha-D-galactosidase; alpha-galactosidase A; alpha-galactoside galactohydrolase
EC:3.2.1.23	beta-galactosidase; lactase (ambiguous); beta-lactosidase; maxilact; hydrolact; beta-D-lactosidase; S 2107; lactozym; trilactase; beta-D-galactanase; oryzatym; sumiklat
EC:3.2.1.26	beta-fructofuranosidase; invertase; saccharase; glucosucrase; beta-h-fructosidase; beta-fructosidase; invertin; sucrase; maxinvert L 1000; fructosylinvertase; alkaline invertase; acid invertase
EC:5.1.3.2	UDP-glucose 4-epimerase; UDP-galactose 4-epimerase; uridine diphosphoglucose epimerase; galactowaldenase; UDPG-4-epimerase; uridine diphosphate galactose 4-epimerase; uridine diphospho-galactose-4-epimerase; UDP-glucose epimerase; 4-epimerase; uridine diphosphoglucose 4-epimerase; uridine diphosphate glucose 4-epimerase; UDP-D-galactose 4-epimerase
EC:5.4.2.2	phosphoglucomutase (alpha-D-glucose-1,6-bisphosphate-dependent); glucose phosphomutase; phosphoglucose mutase
EC:1.1.1.21	aldehyde reductase
ath00250 Alanine, aspartate and glutamate metabolism - Arabidopsis thaliana (thale cress) (29)
EC:1.4.1.3	glutamate dehydrogenase [NAD(P)+]; glutamic dehydrogenase; glutamate dehydrogenase [NAD(P)+]
EC:2.4.2.14	amidophosphoribosyltransferase; phosphoribosyldiphosphate 5-amidotransferase; glutamine phosphoribosyldiphosphate amidotransferase; alpha-5-phosphoribosyl-1-pyrophosphate amidotransferase; 5'-phosphoribosylpyrophosphate amidotransferase; 5-phosphoribosyl-1-pyrophosphate amidotransferase; 5-phosphororibosyl-1-pyrophosphate amidotransferase; glutamine 5-phosphoribosylpyrophosphate amidotransferase;…
EC:2.6.1.1	aspartate transaminase; glutamic-oxaloacetic transaminase; glutamic-aspartic transaminase; transaminase A; AAT; AspT; 2-oxoglutarate-glutamate aminotransferase; aspartate alpha-ketoglutarate transaminase; aspartate aminotransferase; aspartate-2-oxoglutarate transaminase; aspartic acid aminotransferase; aspartic aminotransferase; aspartyl aminotransferase; AST; glutamate-oxalacetate aminotransfera…
EC:2.6.1.2	alanine transaminase; glutamic-pyruvic transaminase; glutamic-alanine transaminase; GPT (ambiguous); beta-alanine aminotransferase; alanine aminotransferase; alanine-alpha-ketoglutarate aminotransferase; alanine-pyruvate aminotransferase; ALT; glutamic acid-pyruvic acid transaminase; glutamic-pyruvic aminotransferase; L-alanine aminotransferase; L-alanine transaminase; L-alanine-alpha-ketoglutara…
EC:4.1.1.15	glutamate decarboxylase; L-glutamic acid decarboxylase; L-glutamic decarboxylase; cysteic acid decarboxylase; L-glutamate alpha-decarboxylase; aspartate 1-decarboxylase; aspartic alpha-decarboxylase; L-aspartate-alpha-decarboxylase; gamma-glutamate decarboxylase; L-glutamate 1-carboxy-lyase
EC:6.3.1.2	glutamine synthetase; glutamate---ammonia ligase; glutamylhydroxamic synthetase; L-glutamine synthetase; GS
EC:6.3.4.4	adenylosuccinate synthase; IMP---aspartate ligase; adenylosuccinate synthetase; succinoadenylic kinosynthetase; succino-AMP synthetase
EC:6.3.5.4	asparagine synthase (glutamine-hydrolysing); asparagine synthetase (glutamine-hydrolysing); glutamine-dependent asparagine synthetase; asparagine synthetase B; AS; AS-B
EC:3.5.1.1	asparaginase
ath00260 Glycine, serine and threonine metabolism - Arabidopsis thaliana (thale cress) (29)
EC:1.2.1.3	aldehyde dehydrogenase (NAD+); CoA-independent aldehyde dehydrogenase; m-methylbenzaldehyde dehydrogenase; NAD-aldehyde dehydrogenase; NAD-dependent 4-hydroxynonenal dehydrogenase; NAD-dependent aldehyde dehydrogenase; NAD-linked aldehyde dehydrogenase; propionaldehyde dehydrogenase; aldehyde dehydrogenase (NAD)
EC:1.2.1.8	betaine-aldehyde dehydrogenase; betaine aldehyde oxidase; BADH; betaine aldehyde dehydrogenase; BetB
EC:1.4.4.2	glycine dehydrogenase (aminomethyl-transferring); P-protein; glycine decarboxylase; glycine-cleavage complex; glycine:lipoylprotein oxidoreductase (decarboxylating and acceptor-aminomethylating); protein P1; glycine dehydrogenase (decarboxylating); glycine cleavage system P-protein; glycine-cleavage complex P-protein
EC:1.8.1.4	dihydrolipoyl dehydrogenase; LDP-Glc; LDP-Val; dehydrolipoate dehydrogenase; diaphorase; dihydrolipoamide dehydrogenase; dihydrolipoamide:NAD+ oxidoreductase; dihydrolipoic dehydrogenase; dihydrothioctic dehydrogenase; lipoamide dehydrogenase (NADH); lipoamide oxidoreductase (NADH); lipoamide reductase; lipoamide reductase (NADH); lipoate dehydrogenase; lipoic acid dehydrogenase; lipoyl dehydroge…
EC:2.1.2.1	glycine hydroxymethyltransferase; serine aldolase; threonine aldolase; serine hydroxymethylase; serine hydroxymethyltransferase; allothreonine aldolase; L-serine hydroxymethyltransferase; L-threonine aldolase; serine hydroxymethyltransferase; serine transhydroxymethylase
EC:2.1.2.10	aminomethyltransferase; S-aminomethyldihydrolipoylprotein:(6S)-tetrahydrofolate aminomethyltransferase (ammonia-forming); T-protein; glycine synthase; tetrahydrofolate aminomethyltransferase; [protein]-8-S-aminomethyldihydrolipoyllysine:tetrahydrofolate aminomethyltransferase (ammonia-forming)
EC:2.6.1.2	alanine transaminase; glutamic-pyruvic transaminase; glutamic-alanine transaminase; GPT (ambiguous); beta-alanine aminotransferase; alanine aminotransferase; alanine-alpha-ketoglutarate aminotransferase; alanine-pyruvate aminotransferase; ALT; glutamic acid-pyruvic acid transaminase; glutamic-pyruvic aminotransferase; L-alanine aminotransferase; L-alanine transaminase; L-alanine-alpha-ketoglutara…
EC:2.6.1.52	phosphoserine transaminase; PSAT; phosphoserine aminotransferase; 3-phosphoserine aminotransferase; hydroxypyruvic phosphate-glutamic transaminase; L-phosphoserine aminotransferase; phosphohydroxypyruvate transaminase; phosphohydroxypyruvic-glutamic transaminase; 3-O-phospho-L-serine:2-oxoglutarate aminotransferase; SerC; PdxC; 3PHP transaminase
EC:4.2.1.20	tryptophan synthase; L-tryptophan synthetase; indoleglycerol phosphate aldolase; tryptophan desmolase; tryptophan synthetase; L-serine hydro-lyase (adding indoleglycerol-phosphate); L-serine hydro-lyase [adding 1-C-(indol-3-yl)glycerol 3-phosphate, L-tryptophan and glyceraldehyde-3-phosphate-forming]
EC:4.2.3.1	threonine synthase; threonine synthetase; O-phospho-L-homoserine phospho-lyase (adding water)
EC:1.4.3.6	amine oxidase
ath00910 Nitrogen metabolism - Arabidopsis thaliana (thale cress) (29)
EC:1.4.1.3	glutamate dehydrogenase [NAD(P)+]; glutamic dehydrogenase; glutamate dehydrogenase [NAD(P)+]
EC:1.4.7.1	glutamate synthase (ferredoxin); ferredoxin-dependent glutamate synthase; ferredoxin-glutamate synthase; glutamate synthase (ferredoxin-dependent)
EC:1.7.1.1	nitrate reductase (NADH); assimilatory nitrate reductase; NADH-nitrate reductase; NADH-dependent nitrate reductase; assimilatory NADH: nitrate reductase; nitrate reductase (NADH2); NADH2:nitrate oxidoreductase
EC:3.5.5.1	nitrilase; acetonitrilase; benzonitrilase
EC:4.2.1.1	carbonic anhydrase; carbonate dehydratase; anhydrase; carbonate anhydrase; carbonic acid anhydrase; carboxyanhydrase; carbonic anhydrase A; carbonate hydro-lyase; carbonate hydro-lyase (carbon-dioxide-forming)
EC:6.3.1.2	glutamine synthetase; glutamate---ammonia ligase; glutamylhydroxamic synthetase; L-glutamine synthetase; GS
ath01212 Fatty acid metabolism - Arabidopsis thaliana (thale cress) (27)
EC:1.1.1.100	3-oxoacyl-[acyl-carrier-protein] reductase; beta-ketoacyl-[acyl-carrier protein](ACP) reductase; beta-ketoacyl acyl carrier protein (ACP) reductase; beta-ketoacyl reductase; beta-ketoacyl thioester reductase; beta-ketoacyl-ACP reductase; beta-ketoacyl-acyl carrier protein reductase; 3-ketoacyl acyl carrier protein reductase; NADPH-specific 3-oxoacyl-[acylcarrier protein]reductase; 3-oxoacyl-[ACP]…
EC:1.14.19.2	stearoyl-[acyl-carrier-protein] 9-desaturase; stearyl acyl carrier protein desaturase; stearyl-ACP desaturase; acyl-[acyl-carrier-protein] desaturase; acyl-[acyl-carrier protein],hydrogen-donor:oxygen oxidoreductase
EC:1.3.1.9	enoyl-[acyl-carrier-protein] reductase (NADH); enoyl-[acyl carrier protein] reductase; enoyl-ACP reductase; NADH-enoyl acyl carrier protein reductase; NADH-specific enoyl-ACP reductase; acyl-[acyl-carrier-protein]:NAD+ oxidoreductase; fabI (gene name); inhA (gene name)
EC:1.3.3.6	acyl-CoA oxidase; fatty acyl-CoA oxidase; acyl coenzyme A oxidase; fatty acyl-coenzyme A oxidase
EC:4.2.1.17	enoyl-CoA hydratase; enoyl hydrase; unsaturated acyl-CoA hydratase; beta-hydroxyacyl-CoA dehydrase; beta-hydroxyacid dehydrase; acyl coenzyme A hydrase; crotonase; crotonyl hydrase; 2-octenoyl coenzyme A hydrase; enoyl coenzyme A hydratase; 2-enoyl-CoA hydratase; short-chain enoyl-CoA hydratase; ECH; trans-2-enoyl-CoA hydratase; enoyl coenzyme A hydrase (D); enoyl coenzyme A hydrase (L); short ch…
EC:6.4.1.2	acetyl-CoA carboxylase; acetyl coenzyme A carboxylase
ath04146 Peroxisome - Arabidopsis thaliana (thale cress) (26)
EC:1.1.1.42	isocitrate dehydrogenase (NADP+); oxalosuccinate decarboxylase; oxalsuccinic decarboxylase; isocitrate (NADP) dehydrogenase; isocitrate (nicotinamide adenine dinucleotide phosphate) dehydrogenase; NADP-specific isocitrate dehydrogenase; NADP-linked isocitrate dehydrogenase; NADP-dependent isocitrate dehydrogenase; NADP isocitric dehydrogenase; isocitrate dehydrogenase (NADP-dependent); NADP-depen…
EC:1.1.3.15	(S)-2-hydroxy-acid oxidase; hydroxy-acid oxidase A; hydroxy-acid oxidase B; glycolate oxidase; L-2-hydroxy acid oxidase; hydroxyacid oxidase A; L-alpha-hydroxy acid oxidase
EC:1.11.1.6	catalase; equilase; caperase; optidase; catalase-peroxidase; CAT
EC:1.15.1.1	superoxide dismutase; superoxidase dismutase; copper-zinc superoxide dismutase; Cu-Zn superoxide dismutase; ferrisuperoxide dismutase; superoxide dismutase I; superoxide dismutase II; SOD; Cu,Zn-SOD; Mn-SOD; Fe-SOD; SODF; SODS; SOD-1; SOD-2; SOD-3; SOD-4; hemocuprein; erythrocuprein; cytocuprein; cuprein; hepatocuprein
EC:1.3.3.6	acyl-CoA oxidase; fatty acyl-CoA oxidase; acyl coenzyme A oxidase; fatty acyl-coenzyme A oxidase
ath00071 Fatty acid degradation - Arabidopsis thaliana (thale cress) (24)
EC:1.1.1.1	alcohol dehydrogenase; aldehyde reductase; ADH; alcohol dehydrogenase (NAD); aliphatic alcohol dehydrogenase; ethanol dehydrogenase; NAD-dependent alcohol dehydrogenase; NAD-specific aromatic alcohol dehydrogenase; NADH-alcohol dehydrogenase; NADH-aldehyde dehydrogenase; primary alcohol dehydrogenase; yeast alcohol dehydrogenase
EC:1.2.1.3	aldehyde dehydrogenase (NAD+); CoA-independent aldehyde dehydrogenase; m-methylbenzaldehyde dehydrogenase; NAD-aldehyde dehydrogenase; NAD-dependent 4-hydroxynonenal dehydrogenase; NAD-dependent aldehyde dehydrogenase; NAD-linked aldehyde dehydrogenase; propionaldehyde dehydrogenase; aldehyde dehydrogenase (NAD)
EC:1.2.1.8	betaine-aldehyde dehydrogenase; betaine aldehyde oxidase; BADH; betaine aldehyde dehydrogenase; BetB
EC:1.3.3.6	acyl-CoA oxidase; fatty acyl-CoA oxidase; acyl coenzyme A oxidase; fatty acyl-coenzyme A oxidase
EC:4.2.1.17	enoyl-CoA hydratase; enoyl hydrase; unsaturated acyl-CoA hydratase; beta-hydroxyacyl-CoA dehydrase; beta-hydroxyacid dehydrase; acyl coenzyme A hydrase; crotonase; crotonyl hydrase; 2-octenoyl coenzyme A hydrase; enoyl coenzyme A hydratase; 2-enoyl-CoA hydratase; short-chain enoyl-CoA hydratase; ECH; trans-2-enoyl-CoA hydratase; enoyl coenzyme A hydrase (D); enoyl coenzyme A hydrase (L); short ch…
ath03050 Proteasome - Arabidopsis thaliana (thale cress) (23)
EC:3.4.25.1	proteasome endopeptidase complex; ingensin; macropain; multicatalytic endopeptidase complex; prosome; multicatalytic proteinase (complex); MCP; proteasome; large multicatalytic protease; multicatalytic proteinase; proteasome organelle; alkaline protease; 26S protease; tricorn proteinase; tricorn protease
ath00220 Arginine biosynthesis - Arabidopsis thaliana (thale cress) (23)
EC:1.2.1.38	N-acetyl-gamma-glutamyl-phosphate reductase; reductase, acetyl-gamma-glutamyl phosphate; N-acetylglutamate 5-semialdehyde dehydrogenase; N-acetylglutamic gamma-semialdehyde dehydrogenase; N-acetyl-L-glutamate gamma-semialdehyde:NADP+ oxidoreductase (phosphorylating)
EC:1.4.1.3	glutamate dehydrogenase [NAD(P)+]; glutamic dehydrogenase; glutamate dehydrogenase [NAD(P)+]
EC:2.1.3.3	ornithine carbamoyltransferase; citrulline phosphorylase; ornithine transcarbamylase; OTC; carbamylphosphate-ornithine transcarbamylase; L-ornithine carbamoyltransferase; L-ornithine carbamyltransferase; L-ornithine transcarbamylase; ornithine carbamyltransferase
EC:2.6.1.1	aspartate transaminase; glutamic-oxaloacetic transaminase; glutamic-aspartic transaminase; transaminase A; AAT; AspT; 2-oxoglutarate-glutamate aminotransferase; aspartate alpha-ketoglutarate transaminase; aspartate aminotransferase; aspartate-2-oxoglutarate transaminase; aspartic acid aminotransferase; aspartic aminotransferase; aspartyl aminotransferase; AST; glutamate-oxalacetate aminotransfera…
EC:2.6.1.2	alanine transaminase; glutamic-pyruvic transaminase; glutamic-alanine transaminase; GPT (ambiguous); beta-alanine aminotransferase; alanine aminotransferase; alanine-alpha-ketoglutarate aminotransferase; alanine-pyruvate aminotransferase; ALT; glutamic acid-pyruvic acid transaminase; glutamic-pyruvic aminotransferase; L-alanine aminotransferase; L-alanine transaminase; L-alanine-alpha-ketoglutara…
EC:3.5.1.5	urease
EC:3.5.3.1	arginase; arginine amidinase; canavanase; L-arginase; arginine transamidinase
EC:6.3.1.2	glutamine synthetase; glutamate---ammonia ligase; glutamylhydroxamic synthetase; L-glutamine synthetase; GS
ath01040 Biosynthesis of unsaturated fatty acids - Arabidopsis thaliana (thale cress) (19)
EC:1.1.1.100	3-oxoacyl-[acyl-carrier-protein] reductase; beta-ketoacyl-[acyl-carrier protein](ACP) reductase; beta-ketoacyl acyl carrier protein (ACP) reductase; beta-ketoacyl reductase; beta-ketoacyl thioester reductase; beta-ketoacyl-ACP reductase; beta-ketoacyl-acyl carrier protein reductase; 3-ketoacyl acyl carrier protein reductase; NADPH-specific 3-oxoacyl-[acylcarrier protein]reductase; 3-oxoacyl-[ACP]…
EC:1.14.19.2	stearoyl-[acyl-carrier-protein] 9-desaturase; stearyl acyl carrier protein desaturase; stearyl-ACP desaturase; acyl-[acyl-carrier-protein] desaturase; acyl-[acyl-carrier protein],hydrogen-donor:oxygen oxidoreductase
EC:1.3.3.6	acyl-CoA oxidase; fatty acyl-CoA oxidase; acyl coenzyme A oxidase; fatty acyl-coenzyme A oxidase
ath00900 Terpenoid backbone biosynthesis - Arabidopsis thaliana (thale cress) (19)
EC:1.8.3.5	prenylcysteine oxidase; prenylcysteine lyase
EC:2.5.1.1	dimethylallyltranstransferase; geranyl-diphosphate synthase; prenyltransferase; dimethylallyltransferase; DMAPP:IPP-dimethylallyltransferase; (2E,6E)-farnesyl diphosphate synthetase; diprenyltransferase; geranyl pyrophosphate synthase; geranyl pyrophosphate synthetase; trans-farnesyl pyrophosphate synthetase
ath04141 Protein processing in endoplasmic reticulum - Arabidopsis thaliana (thale cress) (19)
EC:2.7.11.1	non-specific serine/threonine protein kinase; A-kinase; AP50 kinase; ATP-protein transphosphorylase; calcium-dependent protein kinase C; calcium/phospholipid-dependent protein kinase; cAMP-dependent protein kinase; cAMP-dependent protein kinase A; casein kinase; casein kinase (phosphorylating); casein kinase 2; casein kinase I; casein kinase II; cGMP-dependent protein kinase; CK-2; CKI; CKII; cyc…
EC:5.3.4.1	protein disulfide-isomerase; S-S rearrangase
ath00330 Arginine and proline metabolism - Arabidopsis thaliana (thale cress) (19)
EC:1.2.1.3	aldehyde dehydrogenase (NAD+); CoA-independent aldehyde dehydrogenase; m-methylbenzaldehyde dehydrogenase; NAD-aldehyde dehydrogenase; NAD-dependent 4-hydroxynonenal dehydrogenase; NAD-dependent aldehyde dehydrogenase; NAD-linked aldehyde dehydrogenase; propionaldehyde dehydrogenase; aldehyde dehydrogenase (NAD)
EC:1.2.1.8	betaine-aldehyde dehydrogenase; betaine aldehyde oxidase; BADH; betaine aldehyde dehydrogenase; BetB
EC:2.5.1.16	spermidine synthase; aminopropyltransferase; putrescine aminopropyltransferase; spermidine synthetase; SpeE; S-adenosylmethioninamine:putrescine 3-aminopropyltransferase
EC:2.6.1.1	aspartate transaminase; glutamic-oxaloacetic transaminase; glutamic-aspartic transaminase; transaminase A; AAT; AspT; 2-oxoglutarate-glutamate aminotransferase; aspartate alpha-ketoglutarate transaminase; aspartate aminotransferase; aspartate-2-oxoglutarate transaminase; aspartic acid aminotransferase; aspartic aminotransferase; aspartyl aminotransferase; AST; glutamate-oxalacetate aminotransfera…
EC:2.7.2.11	glutamate 5-kinase; ATP-L-glutamate 5-phosphotransferase; ATP:gamma-L-glutamate phosphotransferase; gamma-glutamate kinase; gamma-glutamyl kinase; glutamate kinase
EC:3.5.1.53	N-carbamoylputrescine amidase; carbamoylputrescine hydrolase; NCP
EC:3.5.3.1	arginase; arginine amidinase; canavanase; L-arginase; arginine transamidinase
ath00061 Fatty acid biosynthesis - Arabidopsis thaliana (thale cress) (18)
EC:1.1.1.100	3-oxoacyl-[acyl-carrier-protein] reductase; beta-ketoacyl-[acyl-carrier protein](ACP) reductase; beta-ketoacyl acyl carrier protein (ACP) reductase; beta-ketoacyl reductase; beta-ketoacyl thioester reductase; beta-ketoacyl-ACP reductase; beta-ketoacyl-acyl carrier protein reductase; 3-ketoacyl acyl carrier protein reductase; NADPH-specific 3-oxoacyl-[acylcarrier protein]reductase; 3-oxoacyl-[ACP]…
EC:1.14.19.2	stearoyl-[acyl-carrier-protein] 9-desaturase; stearyl acyl carrier protein desaturase; stearyl-ACP desaturase; acyl-[acyl-carrier-protein] desaturase; acyl-[acyl-carrier protein],hydrogen-donor:oxygen oxidoreductase
EC:1.3.1.9	enoyl-[acyl-carrier-protein] reductase (NADH); enoyl-[acyl carrier protein] reductase; enoyl-ACP reductase; NADH-enoyl acyl carrier protein reductase; NADH-specific enoyl-ACP reductase; acyl-[acyl-carrier-protein]:NAD+ oxidoreductase; fabI (gene name); inhA (gene name)
EC:6.4.1.2	acetyl-CoA carboxylase; acetyl coenzyme A carboxylase
ath03015 mRNA surveillance pathway - Arabidopsis thaliana (thale cress) (18)
EC:3.1.3.16	protein-serine/threonine phosphatase; phosphoprotein phosphatase (ambiguous); protein phosphatase-1; protein phosphatase-2A; protein phosphatase-2B; protein phosphatase-2C; protein D phosphatase; phosphospectrin phosphatase; casein phosphatase; Aspergillus awamori acid protein phosphatase; calcineurin; phosphatase 2A; phosphatase 2B; phosphatase II; phosphatase IB; phosphatase C-II; polycation mo…
ath00360 Phenylalanine metabolism - Arabidopsis thaliana (thale cress) (17)
EC:2.1.1.104	caffeoyl-CoA O-methyltransferase; caffeoyl coenzyme A methyltransferase; caffeoyl-CoA 3-O-methyltransferase; trans-caffeoyl-CoA 3-O-methyltransferase
EC:2.6.1.1	aspartate transaminase; glutamic-oxaloacetic transaminase; glutamic-aspartic transaminase; transaminase A; AAT; AspT; 2-oxoglutarate-glutamate aminotransferase; aspartate alpha-ketoglutarate transaminase; aspartate aminotransferase; aspartate-2-oxoglutarate transaminase; aspartic acid aminotransferase; aspartic aminotransferase; aspartyl aminotransferase; AST; glutamate-oxalacetate aminotransfera…
EC:6.2.1.12	4-coumarate---CoA ligase; 4-coumaroyl-CoA synthetase; p-coumaroyl CoA ligase; p-coumaryl coenzyme A synthetase; p-coumaryl-CoA synthetase; p-coumaryl-CoA ligase; feruloyl CoA ligase; hydroxycinnamoyl CoA synthetase; 4-coumarate:coenzyme A ligase; caffeolyl coenzyme A synthetase; p-hydroxycinnamoyl coenzyme A synthetase; feruloyl coenzyme A synthetase; sinapoyl coenzyme A synthetase; 4-coumaryl-Co…
EC:1.4.3.6	amine oxidase
ath00400 Phenylalanine, tyrosine and tryptophan biosynthesis - Arabidopsis thaliana (thale cress) (17)
EC:2.5.1.19	3-phosphoshikimate 1-carboxyvinyltransferase; 5-enolpyruvylshikimate-3-phosphate synthase; 3-enolpyruvylshikimate 5-phosphate synthase; 3-enolpyruvylshikimic acid-5-phosphate synthetase; 5'-enolpyruvylshikimate-3-phosphate synthase; 5-enolpyruvyl-3-phosphoshikimate synthase; 5-enolpyruvylshikimate-3-phosphate synthetase; 5-enolpyruvylshikimate-3-phosphoric acid synthase; enolpyruvylshikimate phos…
EC:2.5.1.54	3-deoxy-7-phosphoheptulonate synthase; 2-dehydro-3-deoxy-phosphoheptonate aldolase; 2-keto-3-deoxy-D-arabino-heptonic acid 7-phosphate synthetase; 3-deoxy-D-arabino-2-heptulosonic acid 7-phosphate synthetase; 3-deoxy-D-arabino-heptolosonate-7-phosphate synthetase; 3-deoxy-D-arabino-heptulosonate 7-phosphate synthetase; 7-phospho-2-keto-3-deoxy-D-arabino-heptonate D-erythrose-4-phosphate lyase (py…
EC:2.6.1.1	aspartate transaminase; glutamic-oxaloacetic transaminase; glutamic-aspartic transaminase; transaminase A; AAT; AspT; 2-oxoglutarate-glutamate aminotransferase; aspartate alpha-ketoglutarate transaminase; aspartate aminotransferase; aspartate-2-oxoglutarate transaminase; aspartic acid aminotransferase; aspartic aminotransferase; aspartyl aminotransferase; AST; glutamate-oxalacetate aminotransfera…
EC:4.2.1.20	tryptophan synthase; L-tryptophan synthetase; indoleglycerol phosphate aldolase; tryptophan desmolase; tryptophan synthetase; L-serine hydro-lyase (adding indoleglycerol-phosphate); L-serine hydro-lyase [adding 1-C-(indol-3-yl)glycerol 3-phosphate, L-tryptophan and glyceraldehyde-3-phosphate-forming]
ath00240 Pyrimidine metabolism - Arabidopsis thaliana (thale cress) (16)
EC:2.4.2.10	orotate phosphoribosyltransferase; orotidylic acid phosphorylase; orotidine-5'-phosphate pyrophosphorylase; OPRTase; orotate phosphoribosyl pyrophosphate transferase; orotic acid phosphoribosyltransferase; orotidine 5'-monophosphate pyrophosphorylase; orotidine monophosphate pyrophosphorylase; orotidine phosphoribosyltransferase; orotidylate phosphoribosyltransferase; orotidylate pyrophosphorylas…
EC:2.4.2.9	uracil phosphoribosyltransferase; UMP pyrophosphorylase; UPRTase; UMP:pyrophosphate phosphoribosyltransferase; uridine 5'-phosphate pyrophosphorylase; uridine monophosphate pyrophosphorylase; uridylate pyrophosphorylase; uridylic pyrophosphorylase
EC:2.7.4.6	nucleoside-diphosphate kinase; nucleoside 5'-diphosphate kinase; nucleoside diphosphate (UDP) kinase; nucleoside diphosphokinase; nucleotide phosphate kinase; UDP kinase; uridine diphosphate kinase
EC:2.7.7.6	DNA-directed RNA polymerase; RNA polymerase; RNA nucleotidyltransferase (DNA-directed); RNA polymerase I; RNA polymerase II; RNA polymerase III; C RNA formation factors; deoxyribonucleic acid-dependent ribonucleic acid polymerase; DNA-dependent ribonucleate nucleotidyltransferase; DNA-dependent RNA nucleotidyltransferase; DNA-dependent RNA polymerase; ribonucleate nucleotidyltransferase; ribonucl…
ath00350 Tyrosine metabolism - Arabidopsis thaliana (thale cress) (15)
EC:1.1.1.1	alcohol dehydrogenase; aldehyde reductase; ADH; alcohol dehydrogenase (NAD); aliphatic alcohol dehydrogenase; ethanol dehydrogenase; NAD-dependent alcohol dehydrogenase; NAD-specific aromatic alcohol dehydrogenase; NADH-alcohol dehydrogenase; NADH-aldehyde dehydrogenase; primary alcohol dehydrogenase; yeast alcohol dehydrogenase
EC:2.6.1.1	aspartate transaminase; glutamic-oxaloacetic transaminase; glutamic-aspartic transaminase; transaminase A; AAT; AspT; 2-oxoglutarate-glutamate aminotransferase; aspartate alpha-ketoglutarate transaminase; aspartate aminotransferase; aspartate-2-oxoglutarate transaminase; aspartic acid aminotransferase; aspartic aminotransferase; aspartyl aminotransferase; AST; glutamate-oxalacetate aminotransfera…
EC:1.4.3.6	amine oxidase
ath00860 Porphyrin and chlorophyll metabolism - Arabidopsis thaliana (thale cress) (15)
EC:1.16.3.1	ferroxidase; ceruloplasmin; caeruloplasmin; ferroxidase I; iron oxidase; iron(II):oxygen oxidoreductase; ferro:O2 oxidoreductase; iron II:oxygen oxidoreductase; hephaestin; HEPH
EC:1.3.1.33	protochlorophyllide reductase; NADPH2-protochlorophyllide oxidoreductase; NADPH-protochlorophyllide oxidoreductase; NADPH-protochlorophyllide reductase; protochlorophyllide oxidoreductase (ambiguous); protochlorophyllide photooxidoreductase; light-dependent protochlorophyllide reductase
EC:1.3.3.3	coproporphyrinogen oxidase; coproporphyrinogen III oxidase; coproporphyrinogenase
EC:1.3.3.4	protoporphyrinogen oxidase; protoporphyrinogen IX oxidase; protoporphyrinogenase; PPO; Protox; HemG; HemY
EC:2.5.1.61	hydroxymethylbilane synthase; HMB-synthase; porphobilinogen deaminase; pre-uroporphyrinogen synthase; uroporphyrinogen I synthase; uroporphyrinogen I synthetase; uroporphyrinogen synthase; uroporphyrinogen synthetase; porphobilinogen ammonia-lyase (polymerizing); (4-[2-carboxyethyl]-3-[carboxymethyl]pyrrol-2-yl)methyltransferase (hydrolysing)
EC:4.1.1.37	uroporphyrinogen decarboxylase; uroporphyrinogen III decarboxylase; porphyrinogen carboxy-lyase; porphyrinogen decarboxylase; uroporphyrinogen-III carboxy-lyase
EC:4.2.1.24	porphobilinogen synthase; aminolevulinate dehydratase; delta-aminolevulinate dehydratase; delta-aminolevulinic acid dehydrase; delta-aminolevulinic acid dehydratase; aminolevulinic dehydratase; delta-aminolevulinic dehydratase; 5-levulinic acid dehydratase; 5-aminolevulinate hydro-lyase (adding 5-aminolevulinate and cyclizing); hemB (gene name)
EC:5.4.3.8	glutamate-1-semialdehyde 2,1-aminomutase; glutamate-1-semialdehyde aminotransferase
ath00592 alpha-Linolenic acid metabolism - Arabidopsis thaliana (thale cress) (15)
EC:1.1.1.1	alcohol dehydrogenase; aldehyde reductase; ADH; alcohol dehydrogenase (NAD); aliphatic alcohol dehydrogenase; ethanol dehydrogenase; NAD-dependent alcohol dehydrogenase; NAD-specific aromatic alcohol dehydrogenase; NADH-alcohol dehydrogenase; NADH-aldehyde dehydrogenase; primary alcohol dehydrogenase; yeast alcohol dehydrogenase
EC:1.13.11.12	linoleate 13S-lipoxygenase; 13-lipoxidase; carotene oxidase; 13-lipoperoxidase; fat oxidase; 13-lipoxydase; lionoleate:O2 13-oxidoreductase
EC:1.3.3.6	acyl-CoA oxidase; fatty acyl-CoA oxidase; acyl coenzyme A oxidase; fatty acyl-coenzyme A oxidase
EC:4.2.1.17	enoyl-CoA hydratase; enoyl hydrase; unsaturated acyl-CoA hydratase; beta-hydroxyacyl-CoA dehydrase; beta-hydroxyacid dehydrase; acyl coenzyme A hydrase; crotonase; crotonyl hydrase; 2-octenoyl coenzyme A hydrase; enoyl coenzyme A hydratase; 2-enoyl-CoA hydratase; short-chain enoyl-CoA hydratase; ECH; trans-2-enoyl-CoA hydratase; enoyl coenzyme A hydrase (D); enoyl coenzyme A hydrase (L); short ch…
ath00564 Glycerophospholipid metabolism - Arabidopsis thaliana (thale cress) (15)
EC:2.1.1.103	phosphoethanolamine N-methyltransferase; phosphoethanolamine methyltransferase
EC:3.1.4.4	phospholipase D; lipophosphodiesterase II; lecithinase D; choline phosphatase
ath00410 beta-Alanine metabolism - Arabidopsis thaliana (thale cress) (14)
EC:1.2.1.3	aldehyde dehydrogenase (NAD+); CoA-independent aldehyde dehydrogenase; m-methylbenzaldehyde dehydrogenase; NAD-aldehyde dehydrogenase; NAD-dependent 4-hydroxynonenal dehydrogenase; NAD-dependent aldehyde dehydrogenase; NAD-linked aldehyde dehydrogenase; propionaldehyde dehydrogenase; aldehyde dehydrogenase (NAD)
EC:1.2.1.8	betaine-aldehyde dehydrogenase; betaine aldehyde oxidase; BADH; betaine aldehyde dehydrogenase; BetB
EC:2.5.1.16	spermidine synthase; aminopropyltransferase; putrescine aminopropyltransferase; spermidine synthetase; SpeE; S-adenosylmethioninamine:putrescine 3-aminopropyltransferase
EC:4.1.1.15	glutamate decarboxylase; L-glutamic acid decarboxylase; L-glutamic decarboxylase; cysteic acid decarboxylase; L-glutamate alpha-decarboxylase; aspartate 1-decarboxylase; aspartic alpha-decarboxylase; L-aspartate-alpha-decarboxylase; gamma-glutamate decarboxylase; L-glutamate 1-carboxy-lyase
EC:1.4.3.6	amine oxidase
ath00562 Inositol phosphate metabolism - Arabidopsis thaliana (thale cress) (14)
EC:2.7.1.134	inositol-tetrakisphosphate 1-kinase; 1D-myo-inositol-tetrakisphosphate 1-kinase; inositol-trisphosphate 6-kinase; 1D-myo-inositol-trisphosphate 6-kinase; ATP:1D-myo-inositol-1,3,4-trisphosphate 6-phosphotransferase; inositol-trisphosphate 5-kinase; 1D-myo-inositol-trisphosphate 5-kinase; ATP:1D-myo-inositol-1,3,4-trisphosphate 5-phosphotransferase
EC:3.1.3.16	protein-serine/threonine phosphatase; phosphoprotein phosphatase (ambiguous); protein phosphatase-1; protein phosphatase-2A; protein phosphatase-2B; protein phosphatase-2C; protein D phosphatase; phosphospectrin phosphatase; casein phosphatase; Aspergillus awamori acid protein phosphatase; calcineurin; phosphatase 2A; phosphatase 2B; phosphatase II; phosphatase IB; phosphatase C-II; polycation mo…
EC:3.1.3.25	inositol-phosphate phosphatase; myo-inositol-1(or 4)-monophosphatase; inositol 1-phosphatase; L-myo-inositol-1-phosphate phosphatase; myo-inositol 1-phosphatase; inositol phosphatase; inositol monophosphate phosphatase; inositol-1(or 4)-monophosphatase; myo-inositol-1(or 4)-phosphate phosphohydrolase; myo-inositol monophosphatase; myo-inositol-1-phosphatase
EC:5.3.1.1	triose-phosphate isomerase; phosphotriose isomerase; triose phosphoisomerase; triose phosphate mutase; D-glyceraldehyde-3-phosphate ketol-isomerase
EC:5.5.1.4	inositol-3-phosphate synthase; myo-inositol-1-phosphate synthase; D-glucose 6-phosphate cycloaldolase; inositol 1-phosphate synthatase; glucose 6-phosphate cyclase; inositol 1-phosphate synthetase; glucose-6-phosphate inositol monophosphate cycloaldolase; glucocycloaldolase; 1L-myo-inositol-1-phosphate lyase (isomerizing)
ath00640 Propanoate metabolism - Arabidopsis thaliana (thale cress) (13)
EC:1.1.1.27	L-lactate dehydrogenase; lactic acid dehydrogenase; L(+)-nLDH; L-(+)-lactate dehydrogenase; L-lactic dehydrogenase; L-lactic acid dehydrogenase; lactate dehydrogenase; lactate dehydrogenase NAD+-dependent; lactic dehydrogenase; NAD+-lactate dehydrogenase
EC:1.8.1.4	dihydrolipoyl dehydrogenase; LDP-Glc; LDP-Val; dehydrolipoate dehydrogenase; diaphorase; dihydrolipoamide dehydrogenase; dihydrolipoamide:NAD+ oxidoreductase; dihydrolipoic dehydrogenase; dihydrothioctic dehydrogenase; lipoamide dehydrogenase (NADH); lipoamide oxidoreductase (NADH); lipoamide reductase; lipoamide reductase (NADH); lipoate dehydrogenase; lipoic acid dehydrogenase; lipoyl dehydroge…
EC:6.2.1.4	succinate---CoA ligase (GDP-forming); succinyl-CoA synthetase (GDP-forming); succinyl coenzyme A synthetase (guanosine diphosphate-forming); succinate thiokinase; succinic thiokinase; succinyl coenzyme A synthetase; succinate-phosphorylating enzyme; P-enzyme; SCS; G-STK; succinyl coenzyme A synthetase (GDP-forming); succinyl CoA synthetase; succinyl coenzyme A synthetase
EC:6.4.1.2	acetyl-CoA carboxylase; acetyl coenzyme A carboxylase
ath00941 Flavonoid biosynthesis - Arabidopsis thaliana (thale cress) (12)
EC:1.1.1.219	dihydroflavonol 4-reductase; dihydrokaempferol 4-reductase; dihydromyricetin reductase; NADPH-dihydromyricetin reductase; dihydroquercetin reductase; DFR (gene name); cis-3,4-leucopelargonidin:NADP+ 4-oxidoreductase; dihydroflavanol 4-reductase (incorrect)
EC:1.14.11.19	anthocyanidin synthase; leucocyanidin oxygenase; leucocyanidin,2-oxoglutarate:oxygen oxidoreductase; ANS (gene name)
EC:1.14.11.9	flavanone 3-dioxygenase; naringenin 3-hydroxylase; flavanone 3-hydroxylase; flavanone 3beta-hydroxylase; flavanone synthase I; (2S)-flavanone 3-hydroxylase; naringenin,2-oxoglutarate:oxygen oxidoreductase (3-hydroxylating); F3H; flavanone,2-oxoglutarate:oxygen oxidoreductase (3-hydroxylating)
EC:2.1.1.104	caffeoyl-CoA O-methyltransferase; caffeoyl coenzyme A methyltransferase; caffeoyl-CoA 3-O-methyltransferase; trans-caffeoyl-CoA 3-O-methyltransferase
EC:2.3.1.74	naringenin-chalcone synthase; chalcone synthase; flavanone synthase; 6'-deoxychalcone synthase; chalcone synthetase; DOCS; CHS
EC:5.5.1.6	chalcone isomerase; chalcone-flavanone isomerase; flavanone lyase (decyclizing)
EC:2.3.1.170	6'-deoxychalcone synthase
ath04144 Endocytosis - Arabidopsis thaliana (thale cress) (12)
EC:3.1.4.4	phospholipase D; lipophosphodiesterase II; lecithinase D; choline phosphatase
ath00280 Valine, leucine and isoleucine degradation - Arabidopsis thaliana (thale cress) (12)
EC:1.2.1.3	aldehyde dehydrogenase (NAD+); CoA-independent aldehyde dehydrogenase; m-methylbenzaldehyde dehydrogenase; NAD-aldehyde dehydrogenase; NAD-dependent 4-hydroxynonenal dehydrogenase; NAD-dependent aldehyde dehydrogenase; NAD-linked aldehyde dehydrogenase; propionaldehyde dehydrogenase; aldehyde dehydrogenase (NAD)
EC:1.2.1.8	betaine-aldehyde dehydrogenase; betaine aldehyde oxidase; BADH; betaine aldehyde dehydrogenase; BetB
EC:1.8.1.4	dihydrolipoyl dehydrogenase; LDP-Glc; LDP-Val; dehydrolipoate dehydrogenase; diaphorase; dihydrolipoamide dehydrogenase; dihydrolipoamide:NAD+ oxidoreductase; dihydrolipoic dehydrogenase; dihydrothioctic dehydrogenase; lipoamide dehydrogenase (NADH); lipoamide oxidoreductase (NADH); lipoamide reductase; lipoamide reductase (NADH); lipoate dehydrogenase; lipoic acid dehydrogenase; lipoyl dehydroge…
EC:6.4.1.4	methylcrotonoyl-CoA carboxylase; methylcrotonyl coenzyme A carboxylase; beta-methylcrotonyl coenzyme A carboxylase; beta-methylcrotonyl CoA carboxylase; methylcrotonyl-CoA carboxylase
ath00565 Ether lipid metabolism - Arabidopsis thaliana (thale cress) (12)
EC:3.1.4.4	phospholipase D; lipophosphodiesterase II; lecithinase D; choline phosphatase
ath00380 Tryptophan metabolism - Arabidopsis thaliana (thale cress) (12)
EC:1.11.1.6	catalase; equilase; caperase; optidase; catalase-peroxidase; CAT
EC:1.2.1.3	aldehyde dehydrogenase (NAD+); CoA-independent aldehyde dehydrogenase; m-methylbenzaldehyde dehydrogenase; NAD-aldehyde dehydrogenase; NAD-dependent 4-hydroxynonenal dehydrogenase; NAD-dependent aldehyde dehydrogenase; NAD-linked aldehyde dehydrogenase; propionaldehyde dehydrogenase; aldehyde dehydrogenase (NAD)
EC:1.2.1.8	betaine-aldehyde dehydrogenase; betaine aldehyde oxidase; BADH; betaine aldehyde dehydrogenase; BetB
EC:3.5.5.1	nitrilase; acetonitrilase; benzonitrilase
ath00670 One carbon pool by folate - Arabidopsis thaliana (thale cress) (11)
EC:1.5.1.20	methylenetetrahydrofolate reductase [NAD(P)H]; methylenetetrahydrofolate (reduced nicotinamide adenine dinucleotide phosphate) reductase; 5,10-methylenetetrahydrofolate reductase (NADPH); 5,10-methylenetetrahydrofolic acid reductase; 5,10-CH2-H4folate reductase; methylenetetrahydrofolate reductase (NADPH2); 5-methyltetrahydrofolate:NAD+ oxidoreductase; 5-methyltetrahydrofolate:NAD+ oxidoreductase…
EC:2.1.2.1	glycine hydroxymethyltransferase; serine aldolase; threonine aldolase; serine hydroxymethylase; serine hydroxymethyltransferase; allothreonine aldolase; L-serine hydroxymethyltransferase; L-threonine aldolase; serine hydroxymethyltransferase; serine transhydroxymethylase
EC:2.1.2.10	aminomethyltransferase; S-aminomethyldihydrolipoylprotein:(6S)-tetrahydrofolate aminomethyltransferase (ammonia-forming); T-protein; glycine synthase; tetrahydrofolate aminomethyltransferase; [protein]-8-S-aminomethyldihydrolipoyllysine:tetrahydrofolate aminomethyltransferase (ammonia-forming)
EC:6.3.4.3	formate---tetrahydrofolate ligase; formyltetrahydrofolate synthetase; 10-formyltetrahydrofolate synthetase; tetrahydrofolic formylase; tetrahydrofolate formylase
ath03008 Ribosome biogenesis in eukaryotes - Arabidopsis thaliana (thale cress) (11)
EC:2.7.11.1	non-specific serine/threonine protein kinase; A-kinase; AP50 kinase; ATP-protein transphosphorylase; calcium-dependent protein kinase C; calcium/phospholipid-dependent protein kinase; cAMP-dependent protein kinase; cAMP-dependent protein kinase A; casein kinase; casein kinase (phosphorylating); casein kinase 2; casein kinase I; casein kinase II; cGMP-dependent protein kinase; CK-2; CKI; CKII; cyc…
EC:2.7.4.3	adenylate kinase; myokinase; 5'-AMP-kinase; adenylic kinase; adenylokinase
ath00920 Sulfur metabolism - Arabidopsis thaliana (thale cress) (10)
EC:2.5.1.47	cysteine synthase; O-acetyl-L-serine sulfhydrylase; O-acetyl-L-serine sulfohydrolase; O-acetylserine (thiol)-lyase; O-acetylserine (thiol)-lyase A; O-acetylserine sulfhydrylase; O3-acetyl-L-serine acetate-lyase (adding hydrogen-sulfide); acetylserine sulfhydrylase; cysteine synthetase; S-sulfocysteine synthase; 3-O-acetyl-L-serine:hydrogen-sulfide 2-amino-2-carboxyethyltransferase; O3-acetyl-L-se…
ath00650 Butanoate metabolism - Arabidopsis thaliana (thale cress) (10)
EC:2.2.1.6	acetolactate synthase; alpha-acetohydroxy acid synthetase; alpha-acetohydroxyacid synthase; alpha-acetolactate synthase; alpha-acetolactate synthetase; acetohydroxy acid synthetase; acetohydroxyacid synthase; acetolactate pyruvate-lyase (carboxylating); acetolactic synthetase
EC:4.1.1.15	glutamate decarboxylase; L-glutamic acid decarboxylase; L-glutamic decarboxylase; cysteic acid decarboxylase; L-glutamate alpha-decarboxylase; aspartate 1-decarboxylase; aspartic alpha-decarboxylase; L-aspartate-alpha-decarboxylase; gamma-glutamate decarboxylase; L-glutamate 1-carboxy-lyase
ath00561 Glycerolipid metabolism - Arabidopsis thaliana (thale cress) (10)
EC:1.2.1.3	aldehyde dehydrogenase (NAD+); CoA-independent aldehyde dehydrogenase; m-methylbenzaldehyde dehydrogenase; NAD-aldehyde dehydrogenase; NAD-dependent 4-hydroxynonenal dehydrogenase; NAD-dependent aldehyde dehydrogenase; NAD-linked aldehyde dehydrogenase; propionaldehyde dehydrogenase; aldehyde dehydrogenase (NAD)
EC:1.2.1.8	betaine-aldehyde dehydrogenase; betaine aldehyde oxidase; BADH; betaine aldehyde dehydrogenase; BetB
EC:3.13.1.1	UDP-sulfoquinovose synthase; sulfite:UDP-glucose sulfotransferase; UDPsulfoquinovose synthase; UDP-6-sulfo-6-deoxyglucose sulfohydrolase
EC:3.2.1.22	alpha-galactosidase; melibiase; alpha-D-galactosidase; alpha-galactosidase A; alpha-galactoside galactohydrolase
EC:1.1.1.21	aldehyde reductase
ath03020 RNA polymerase - Arabidopsis thaliana (thale cress) (10)
EC:2.7.7.6	DNA-directed RNA polymerase; RNA polymerase; RNA nucleotidyltransferase (DNA-directed); RNA polymerase I; RNA polymerase II; RNA polymerase III; C RNA formation factors; deoxyribonucleic acid-dependent ribonucleic acid polymerase; DNA-dependent ribonucleate nucleotidyltransferase; DNA-dependent RNA nucleotidyltransferase; DNA-dependent RNA polymerase; ribonucleate nucleotidyltransferase; ribonucl…
ath04136 Autophagy - other - Arabidopsis thaliana (thale cress) (10)
EC:2.7.11.1	non-specific serine/threonine protein kinase; A-kinase; AP50 kinase; ATP-protein transphosphorylase; calcium-dependent protein kinase C; calcium/phospholipid-dependent protein kinase; cAMP-dependent protein kinase; cAMP-dependent protein kinase A; casein kinase; casein kinase (phosphorylating); casein kinase 2; casein kinase I; casein kinase II; cGMP-dependent protein kinase; CK-2; CKI; CKII; cyc…
EC:3.1.3.16	protein-serine/threonine phosphatase; phosphoprotein phosphatase (ambiguous); protein phosphatase-1; protein phosphatase-2A; protein phosphatase-2B; protein phosphatase-2C; protein D phosphatase; phosphospectrin phosphatase; casein phosphatase; Aspergillus awamori acid protein phosphatase; calcineurin; phosphatase 2A; phosphatase 2B; phosphatase II; phosphatase IB; phosphatase C-II; polycation mo…
ath04070 Phosphatidylinositol signaling system - Arabidopsis thaliana (thale cress) (9)
EC:2.7.1.134	inositol-tetrakisphosphate 1-kinase; 1D-myo-inositol-tetrakisphosphate 1-kinase; inositol-trisphosphate 6-kinase; 1D-myo-inositol-trisphosphate 6-kinase; ATP:1D-myo-inositol-1,3,4-trisphosphate 6-phosphotransferase; inositol-trisphosphate 5-kinase; 1D-myo-inositol-trisphosphate 5-kinase; ATP:1D-myo-inositol-1,3,4-trisphosphate 5-phosphotransferase
EC:3.1.3.16	protein-serine/threonine phosphatase; phosphoprotein phosphatase (ambiguous); protein phosphatase-1; protein phosphatase-2A; protein phosphatase-2B; protein phosphatase-2C; protein D phosphatase; phosphospectrin phosphatase; casein phosphatase; Aspergillus awamori acid protein phosphatase; calcineurin; phosphatase 2A; phosphatase 2B; phosphatase II; phosphatase IB; phosphatase C-II; polycation mo…
EC:3.1.3.25	inositol-phosphate phosphatase; myo-inositol-1(or 4)-monophosphatase; inositol 1-phosphatase; L-myo-inositol-1-phosphate phosphatase; myo-inositol 1-phosphatase; inositol phosphatase; inositol monophosphate phosphatase; inositol-1(or 4)-monophosphatase; myo-inositol-1(or 4)-phosphate phosphohydrolase; myo-inositol monophosphatase; myo-inositol-1-phosphatase
ath00290 Valine, leucine and isoleucine biosynthesis - Arabidopsis thaliana (thale cress) (9)
EC:1.1.1.85	3-isopropylmalate dehydrogenase; beta-isopropylmalic enzyme; beta-isopropylmalate dehydrogenase; threo-Ds-3-isopropylmalate dehydrogenase; 3-carboxy-2-hydroxy-4-methylpentanoate:NAD+ oxidoreductase
EC:1.1.1.86	ketol-acid reductoisomerase (NADP+); dihydroxyisovalerate dehydrogenase (isomerizing); acetohydroxy acid isomeroreductase; ketol acid reductoisomerase; alpha-keto-beta-hydroxylacyl reductoisomerase; 2-hydroxy-3-keto acid reductoisomerase; acetohydroxy acid reductoisomerase; acetolactate reductoisomerase; dihydroxyisovalerate (isomerizing) dehydrogenase; isomeroreductase; reductoisomerase; ketol-a…
EC:2.2.1.6	acetolactate synthase; alpha-acetohydroxy acid synthetase; alpha-acetohydroxyacid synthase; alpha-acetolactate synthase; alpha-acetolactate synthetase; acetohydroxy acid synthetase; acetohydroxyacid synthase; acetolactate pyruvate-lyase (carboxylating); acetolactic synthetase
EC:2.3.3.13	2-isopropylmalate synthase; 3-carboxy-3-hydroxy-4-methylpentanoate 3-methyl-2-oxobutanoate-lyase (CoA-acetylating); alpha-isopropylmalate synthetase; alpha-isopropylmalate synthase; alpha-isopropylmalic synthetase; isopropylmalate synthase; isopropylmalate synthetase
ath00340 Histidine metabolism - Arabidopsis thaliana (thale cress) (8)
EC:1.1.1.23	histidinol dehydrogenase; L-histidinol dehydrogenase
EC:1.2.1.3	aldehyde dehydrogenase (NAD+); CoA-independent aldehyde dehydrogenase; m-methylbenzaldehyde dehydrogenase; NAD-aldehyde dehydrogenase; NAD-dependent 4-hydroxynonenal dehydrogenase; NAD-dependent aldehyde dehydrogenase; NAD-linked aldehyde dehydrogenase; propionaldehyde dehydrogenase; aldehyde dehydrogenase (NAD)
EC:1.2.1.8	betaine-aldehyde dehydrogenase; betaine aldehyde oxidase; BADH; betaine aldehyde dehydrogenase; BetB
EC:3.1.3.25	inositol-phosphate phosphatase; myo-inositol-1(or 4)-monophosphatase; inositol 1-phosphatase; L-myo-inositol-1-phosphate phosphatase; myo-inositol 1-phosphatase; inositol phosphatase; inositol monophosphate phosphatase; inositol-1(or 4)-monophosphatase; myo-inositol-1(or 4)-phosphate phosphohydrolase; myo-inositol monophosphatase; myo-inositol-1-phosphatase
ath00590 Arachidonic acid metabolism - Arabidopsis thaliana (thale cress) (8)
EC:1.11.1.9	glutathione peroxidase; GSH peroxidase; selenium-glutathione peroxidase; reduced glutathione peroxidase
ath00730 Thiamine metabolism - Arabidopsis thaliana (thale cress) (8)
EC:2.7.4.3	adenylate kinase; myokinase; 5'-AMP-kinase; adenylic kinase; adenylokinase
ath00970 Aminoacyl-tRNA biosynthesis - Arabidopsis thaliana (thale cress) (8)
EC:6.1.1.10	methionine---tRNA ligase; methionyl-tRNA synthetase; methionyl-transfer ribonucleic acid synthetase; methionyl-transfer ribonucleate synthetase; methionyl-transfer RNA synthetase; methionine translase; MetRS
EC:6.1.1.11	serine---tRNA ligase; seryl-tRNA synthetase; SerRS; seryl-transfer ribonucleate synthetase; seryl-transfer RNA synthetase; seryl-transfer ribonucleic acid synthetase; serine translase
EC:6.1.1.18	glutamine---tRNA ligase; glutaminyl-tRNA synthetase; glutaminyl-transfer RNA synthetase; glutaminyl-transfer ribonucleate synthetase; glutamine-tRNA synthetase; glutamine translase; glutamate-tRNA ligase; glutaminyl ribonucleic acid; GlnRS
EC:6.1.1.6	lysine---tRNA ligase; lysyl-tRNA synthetase; lysyl-transfer ribonucleate synthetase; lysyl-transfer RNA synthetase; L-lysine-transfer RNA ligase; lysine-tRNA synthetase; lysine translase
ath00130 Ubiquinone and other terpenoid-quinone biosynthesis - Arabidopsis thaliana (thale cress) (7)
EC:6.2.1.12	4-coumarate---CoA ligase; 4-coumaroyl-CoA synthetase; p-coumaroyl CoA ligase; p-coumaryl coenzyme A synthetase; p-coumaryl-CoA synthetase; p-coumaryl-CoA ligase; feruloyl CoA ligase; hydroxycinnamoyl CoA synthetase; 4-coumarate:coenzyme A ligase; caffeolyl coenzyme A synthetase; p-hydroxycinnamoyl coenzyme A synthetase; feruloyl coenzyme A synthetase; sinapoyl coenzyme A synthetase; 4-coumaryl-Co…
ath00600 Sphingolipid metabolism - Arabidopsis thaliana (thale cress) (6)
EC:3.2.1.22	alpha-galactosidase; melibiase; alpha-D-galactosidase; alpha-galactosidase A; alpha-galactoside galactohydrolase
EC:3.2.1.23	beta-galactosidase; lactase (ambiguous); beta-lactosidase; maxilact; hydrolact; beta-D-lactosidase; S 2107; lactozym; trilactase; beta-D-galactanase; oryzatym; sumiklat
ath00450 Selenocompound metabolism - Arabidopsis thaliana (thale cress) (6)
EC:2.1.1.12	methionine S-methyltransferase; S-adenosyl methionine:methionine methyl transferase; methionine methyltransferase; S-adenosylmethionine transmethylase; S-adenosylmethionine-methionine methyltransferase
EC:2.1.1.14	5-methyltetrahydropteroyltriglutamate---homocysteine S-methyltransferase; tetrahydropteroyltriglutamate methyltransferase; homocysteine methylase; methyltransferase, tetrahydropteroylglutamate-homocysteine transmethylase; methyltetrahydropteroylpolyglutamate:homocysteine methyltransferase; cobalamin-independent methionine synthase; methionine synthase (cobalamin-independent); MetE
EC:6.1.1.10	methionine---tRNA ligase; methionyl-tRNA synthetase; methionyl-transfer ribonucleic acid synthetase; methionyl-transfer ribonucleate synthetase; methionyl-transfer RNA synthetase; methionine translase; MetRS
ath00960 Tropane, piperidine and pyridine alkaloid biosynthesis - Arabidopsis thaliana (thale cress) (6)
EC:2.6.1.1	aspartate transaminase; glutamic-oxaloacetic transaminase; glutamic-aspartic transaminase; transaminase A; AAT; AspT; 2-oxoglutarate-glutamate aminotransferase; aspartate alpha-ketoglutarate transaminase; aspartate aminotransferase; aspartate-2-oxoglutarate transaminase; aspartic acid aminotransferase; aspartic aminotransferase; aspartyl aminotransferase; AST; glutamate-oxalacetate aminotransfera…
EC:1.4.3.6	amine oxidase
ath00195 Photosynthesis - Arabidopsis thaliana (thale cress) (6)
EC:1.18.1.2	ferredoxin---NADP+ reductase; ferredoxin-nicotinamide adenine dinucleotide phosphate reductase; ferredoxin-NADP+ reductase; TPNH-ferredoxin reductase; ferredoxin-NADP+ oxidoreductase; NADP+:ferredoxin oxidoreductase; ferredoxin-TPN reductase; ferredoxin-NADP+-oxidoreductase; NADPH:ferredoxin oxidoreductase; ferredoxin-nicotinamide-adenine dinucleotide phosphate (oxidized) reductase
EC:3.6.3.14	H+-transporting two-sector ATPase; ATP synthase; F1-ATPase; FoF1-ATPase; H+-transporting ATPase; mitochondrial ATPase; coupling factors (F0, F1 and CF1); chloroplast ATPase; bacterial Ca2+/Mg2+ ATPase
EC:1.10.9.1	plastoquinol-plastocyanin reductase
ath00310 Lysine degradation - Arabidopsis thaliana (thale cress) (6)
EC:1.2.1.3	aldehyde dehydrogenase (NAD+); CoA-independent aldehyde dehydrogenase; m-methylbenzaldehyde dehydrogenase; NAD-aldehyde dehydrogenase; NAD-dependent 4-hydroxynonenal dehydrogenase; NAD-dependent aldehyde dehydrogenase; NAD-linked aldehyde dehydrogenase; propionaldehyde dehydrogenase; aldehyde dehydrogenase (NAD)
EC:1.2.1.8	betaine-aldehyde dehydrogenase; betaine aldehyde oxidase; BADH; betaine aldehyde dehydrogenase; BetB
ath00780 Biotin metabolism - Arabidopsis thaliana (thale cress) (6)
EC:1.1.1.100	3-oxoacyl-[acyl-carrier-protein] reductase; beta-ketoacyl-[acyl-carrier protein](ACP) reductase; beta-ketoacyl acyl carrier protein (ACP) reductase; beta-ketoacyl reductase; beta-ketoacyl thioester reductase; beta-ketoacyl-ACP reductase; beta-ketoacyl-acyl carrier protein reductase; 3-ketoacyl acyl carrier protein reductase; NADPH-specific 3-oxoacyl-[acylcarrier protein]reductase; 3-oxoacyl-[ACP]…
EC:1.3.1.9	enoyl-[acyl-carrier-protein] reductase (NADH); enoyl-[acyl carrier protein] reductase; enoyl-ACP reductase; NADH-enoyl acyl carrier protein reductase; NADH-specific enoyl-ACP reductase; acyl-[acyl-carrier-protein]:NAD+ oxidoreductase; fabI (gene name); inhA (gene name)
ath00950 Isoquinoline alkaloid biosynthesis - Arabidopsis thaliana (thale cress) (6)
EC:2.6.1.1	aspartate transaminase; glutamic-oxaloacetic transaminase; glutamic-aspartic transaminase; transaminase A; AAT; AspT; 2-oxoglutarate-glutamate aminotransferase; aspartate alpha-ketoglutarate transaminase; aspartate aminotransferase; aspartate-2-oxoglutarate transaminase; aspartic acid aminotransferase; aspartic aminotransferase; aspartyl aminotransferase; AST; glutamate-oxalacetate aminotransfera…
EC:1.4.3.6	amine oxidase
ath00430 Taurine and hypotaurine metabolism - Arabidopsis thaliana (thale cress) (5)
EC:4.1.1.15	glutamate decarboxylase; L-glutamic acid decarboxylase; L-glutamic decarboxylase; cysteic acid decarboxylase; L-glutamate alpha-decarboxylase; aspartate 1-decarboxylase; aspartic alpha-decarboxylase; L-aspartate-alpha-decarboxylase; gamma-glutamate decarboxylase; L-glutamate 1-carboxy-lyase
ath00750 Vitamin B6 metabolism - Arabidopsis thaliana (thale cress) (5)
EC:1.4.3.5	pyridoxal 5'-phosphate synthase; pyridoxamine 5'-phosphate oxidase; pyridoxamine phosphate oxidase; pyridoxine (pyridoxamine)phosphate oxidase; pyridoxine (pyridoxamine) 5'-phosphate oxidase; pyridoxaminephosphate oxidase (EC 1.4.3.5: deaminating); PMP oxidase; pyridoxol-5'-phosphate:oxygen oxidoreductase (deaminating) (incorrect); pyridoxamine-phosphate oxidase; PdxH
EC:2.6.1.52	phosphoserine transaminase; PSAT; phosphoserine aminotransferase; 3-phosphoserine aminotransferase; hydroxypyruvic phosphate-glutamic transaminase; L-phosphoserine aminotransferase; phosphohydroxypyruvate transaminase; phosphohydroxypyruvic-glutamic transaminase; 3-O-phospho-L-serine:2-oxoglutarate aminotransferase; SerC; PdxC; 3PHP transaminase
EC:4.2.3.1	threonine synthase; threonine synthetase; O-phospho-L-homoserine phospho-lyase (adding water)
ath00660 C5-Branched dibasic acid metabolism - Arabidopsis thaliana (thale cress) (5)
EC:1.1.1.85	3-isopropylmalate dehydrogenase; beta-isopropylmalic enzyme; beta-isopropylmalate dehydrogenase; threo-Ds-3-isopropylmalate dehydrogenase; 3-carboxy-2-hydroxy-4-methylpentanoate:NAD+ oxidoreductase
EC:2.2.1.6	acetolactate synthase; alpha-acetohydroxy acid synthetase; alpha-acetohydroxyacid synthase; alpha-acetolactate synthase; alpha-acetolactate synthetase; acetohydroxy acid synthetase; acetohydroxyacid synthase; acetolactate pyruvate-lyase (carboxylating); acetolactic synthetase
ath04712 Circadian rhythm - plant - Arabidopsis thaliana (thale cress) (5)
EC:2.3.1.74	naringenin-chalcone synthase; chalcone synthase; flavanone synthase; 6'-deoxychalcone synthase; chalcone synthetase; DOCS; CHS
EC:2.7.11.1	non-specific serine/threonine protein kinase; A-kinase; AP50 kinase; ATP-protein transphosphorylase; calcium-dependent protein kinase C; calcium/phospholipid-dependent protein kinase; cAMP-dependent protein kinase; cAMP-dependent protein kinase A; casein kinase; casein kinase (phosphorylating); casein kinase 2; casein kinase I; casein kinase II; cGMP-dependent protein kinase; CK-2; CKI; CKII; cyc…
ath03018 RNA degradation - Arabidopsis thaliana (thale cress) (4)
EC:4.2.1.11	phosphopyruvate hydratase; enolase; 2-phosphoglycerate dehydratase; 14-3-2-protein; nervous-system specific enolase; phosphoenolpyruvate hydratase; 2-phosphoglycerate dehydratase; 2-phosphoglyceric dehydratase; 2-phosphoglycerate enolase; gamma-enolase; 2-phospho-D-glycerate hydro-lyase
ath00945 Stilbenoid, diarylheptanoid and gingerol biosynthesis - Arabidopsis thaliana (thale cress) (4)
EC:2.1.1.104	caffeoyl-CoA O-methyltransferase; caffeoyl coenzyme A methyltransferase; caffeoyl-CoA 3-O-methyltransferase; trans-caffeoyl-CoA 3-O-methyltransferase
ath03060 Protein export - Arabidopsis thaliana (thale cress) (4)
ath00770 Pantothenate and CoA biosynthesis - Arabidopsis thaliana (thale cress) (4)
EC:1.1.1.86	ketol-acid reductoisomerase (NADP+); dihydroxyisovalerate dehydrogenase (isomerizing); acetohydroxy acid isomeroreductase; ketol acid reductoisomerase; alpha-keto-beta-hydroxylacyl reductoisomerase; 2-hydroxy-3-keto acid reductoisomerase; acetohydroxy acid reductoisomerase; acetolactate reductoisomerase; dihydroxyisovalerate (isomerizing) dehydrogenase; isomeroreductase; reductoisomerase; ketol-a…
EC:2.2.1.6	acetolactate synthase; alpha-acetohydroxy acid synthetase; alpha-acetohydroxyacid synthase; alpha-acetolactate synthase; alpha-acetolactate synthetase; acetohydroxy acid synthetase; acetohydroxyacid synthase; acetolactate pyruvate-lyase (carboxylating); acetolactic synthetase
ath00591 Linoleic acid metabolism - Arabidopsis thaliana (thale cress) (4)
EC:1.13.11.12	linoleate 13S-lipoxygenase; 13-lipoxidase; carotene oxidase; 13-lipoperoxidase; fat oxidase; 13-lipoxydase; lionoleate:O2 13-oxidoreductase
ath00511 Other glycan degradation - Arabidopsis thaliana (thale cress) (3)
EC:3.2.1.23	beta-galactosidase; lactase (ambiguous); beta-lactosidase; maxilact; hydrolact; beta-D-lactosidase; S 2107; lactozym; trilactase; beta-D-galactanase; oryzatym; sumiklat
ath00603 Glycosphingolipid biosynthesis - globo and isoglobo series - Arabidopsis thaliana (thale cress) (3)
EC:3.2.1.22	alpha-galactosidase; melibiase; alpha-D-galactosidase; alpha-galactosidase A; alpha-galactoside galactohydrolase
ath00901 Indole alkaloid biosynthesis - Arabidopsis thaliana (thale cress) (3)
EC:4.3.3.2	strictosidine synthase; strictosidine synthetase; STR; 3-alpha(S)-strictosidine tryptamine-lyase
ath00531 Glycosaminoglycan degradation - Arabidopsis thaliana (thale cress) (2)
EC:3.2.1.23	beta-galactosidase; lactase (ambiguous); beta-lactosidase; maxilact; hydrolact; beta-D-lactosidase; S 2107; lactozym; trilactase; beta-D-galactanase; oryzatym; sumiklat
ath03040 Spliceosome - Arabidopsis thaliana (thale cress) (2)
EC:5.2.1.8	peptidylprolyl isomerase; PPIase; cyclophilin [misleading, see comments]; peptide bond isomerase; peptidyl-prolyl cis-trans isomerase
ath04933 AGE-RAGE signaling pathway in diabetic complications - Arabidopsis thaliana (thale cress) (2)
EC:2.7.11.24	mitogen-activated protein kinase; c-Jun N-terminal kinase; Dp38; ERK; ERK1; ERK2; extracellular signal-regulated kinase; JNK; JNK3alpha1; LeMPK3; MAP kinase; MAP-2 kinase; MAPK; MBP kinase I; MBP kinase II; microtubule-associated protein 2 kinase; microtubule-associated protein kinase; myelin basic protein kinase; p38delta; p38-2; p42 mitogen-activated protein kinase; p42mapk; PMK-1; PMK-2; PMK-3…
ath00604 Glycosphingolipid biosynthesis - ganglio series - Arabidopsis thaliana (thale cress) (2)
EC:3.2.1.23	beta-galactosidase; lactase (ambiguous); beta-lactosidase; maxilact; hydrolact; beta-D-lactosidase; S 2107; lactozym; trilactase; beta-D-galactanase; oryzatym; sumiklat
ath04120 Ubiquitin mediated proteolysis - Arabidopsis thaliana (thale cress) (1)
EC:5.2.1.8	peptidylprolyl isomerase; PPIase; cyclophilin [misleading, see comments]; peptide bond isomerase; peptidyl-prolyl cis-trans isomerase
ath00740 Riboflavin metabolism - Arabidopsis thaliana (thale cress) (1)
EC:2.5.1.9	riboflavin synthase; heavy riboflavin synthase; light riboflavin synthase; riboflavin synthetase; riboflavine synthase; riboflavine synthetase
ath00966 Glucosinolate biosynthesis - Arabidopsis thaliana (thale cress) (1)
EC:1.1.1.85	3-isopropylmalate dehydrogenase; beta-isopropylmalic enzyme; beta-isopropylmalate dehydrogenase; threo-Ds-3-isopropylmalate dehydrogenase; 3-carboxy-2-hydroxy-4-methylpentanoate:NAD+ oxidoreductase
ath00100 Steroid biosynthesis - Arabidopsis thaliana (thale cress) (1)
ath03410 Base excision repair - Arabidopsis thaliana (thale cress) (1)
ath03440 Homologous recombination - Arabidopsis thaliana (thale cress) (1)
EC:2.7.11.1	non-specific serine/threonine protein kinase; A-kinase; AP50 kinase; ATP-protein transphosphorylase; calcium-dependent protein kinase C; calcium/phospholipid-dependent protein kinase; cAMP-dependent protein kinase; cAMP-dependent protein kinase A; casein kinase; casein kinase (phosphorylating); casein kinase 2; casein kinase I; casein kinase II; cGMP-dependent protein kinase; CK-2; CKI; CKII; cyc…
EC:2.7.8.23	carboxyvinyl-carboxyphosphonate phosphorylmutase
ath03450 Non-homologous end-joining - Arabidopsis thaliana (thale cress) (1)
ath03030 DNA replication - Arabidopsis thaliana (thale cress) (1)
ath04145 Phagosome - Arabidopsis thaliana (thale cress) (1)
EC:3.6.3.14	H+-transporting two-sector ATPase; ATP synthase; F1-ATPase; FoF1-ATPase; H+-transporting ATPase; mitochondrial ATPase; coupling factors (F0, F1 and CF1); chloroplast ATPase; bacterial Ca2+/Mg2+ ATPase
